# County-Level Estimates of Excess Mortality Associated with COVID-19 in the United States

Calvin A. Ackley\*<sup>1</sup>, Dielle J. Lundberg<sup>2</sup>, Lei Ma<sup>3</sup>, Irma T. Elo<sup>4</sup>, Samuel H. Preston<sup>4</sup>,  
and Andrew C. Stokes<sup>2</sup>

<sup>1</sup>U.S. Bureau of Economic Analysis, Washington, D.C.

<sup>2</sup>Department of Global Health, Boston University School of Public Health, Boston, MA

<sup>3</sup>Department of Economics, Boston University, Boston, MA

<sup>4</sup>Department of Sociology, University of Pennsylvania, Philadelphia, PA

July 20, 2021

## Abstract

The COVID-19 pandemic in the US has been largely monitored on the basis of death certificates containing reference to COVID-19. However, prior analyses reveal that a significant percentage of excess deaths associated with the pandemic were not directly assigned to COVID-19 on death records. In the present study, we estimate a generalized linear model of expected mortality in 2020 based on historical trends in deaths by county of residence between 2011 and 2019. We use the results of the model to generate county estimates of excess mortality and excess deaths not assigned to COVID-19 for each county in the US. Overall, we estimate that 437,849 excess deaths occurred in 2020, among which 88% were assigned to COVID-19. The proportion assigned to COVID-19 was lower in the West (82%) and South (83%) as compared to counties in the Midwest (90%) and Northeast (97%). Urban counties (87%) reported lower proportions of excess deaths assigned to COVID-19 than rural areas (93%). The New England Census Division stood out as the only division where directly assigned COVID-19 deaths actually exceeded excess deaths, indicating that reductions in mortality from other causes of death may have occurred. Across individual counties, the percentage of excess deaths not assigned to COVID-19 varied substantially, with some counties' direct COVID-19 tallies capturing only a small fraction of total excess deaths. Our findings suggest that consideration of excess deaths across counties is critical for a full accounting of geographic inequities in mortality during the pandemic.

## 1 Introduction

Estimates of excess deaths are critical to tracking the direct and indirect effects of the COVID-19 pandemic and for developing adequate and equitable policy responses.[1] Provisional estimates from the Center for Disease Control and Prevention (CDC) indicate that between 545,600 and 660,200 excess deaths

---

\*The authors would like to thank Robert N. Anderson and Farida B. Ahmad from the National Center for Health Statistics, Katherine Hempstead from the Robert Wood Johnson Foundation (RWJF), and Abe Dunn from the Bureau of Economic Analysis (BEA) for their input and technical support. Stokes gratefully acknowledges financial support from the RWJF. The views expressed in this paper are those of the authors and not necessarily the views of the BEA or RWJF.

occurred in the United States from January 26, 2020 to February 27, 2021.[2] The CDC further estimates that between 75 and 88% of excess deaths were directly assigned to COVID-19 on death certificates, suggesting that between 12 and 25% of excess deaths were not assigned to COVID-19.[2] Other prior estimates of excess mortality have also found significant discrepancies between direct COVID-19 deaths and excess mortality [2, 3, 4, 5].

Excess deaths not assigned to COVID-19 may reflect a variety of factors, including COVID-19 deaths that were ascribed to other causes of death due to limited testing,[6] indirect deaths caused by interruptions in the provision of health care services,[7, 8] or indirect deaths caused by the broader social and economic consequences of the pandemic.[9, 10, 11] Furthermore, the percent of excess deaths not assigned to COVID-19 varied significantly at the state-level, suggesting that attribution of deaths to COVID-19 may not be uniform across the country. Prior studies have found that the proportion of excess deaths not assigned to COVID-19 also differed significantly by county-level sociodemographic and health care factors, suggesting that state estimates mask significant community-level heterogeneity. [5, 12] While these studies produced estimates of the proportion of excess deaths not assigned to COVID-19 for groups of counties, they did not report individual county estimates.

While prior estimates of excess mortality at the national and state levels are useful for understanding the impact of the pandemic on mortality levels broadly, estimation of excess mortality at the county level may be valuable for several reasons. First, prior studies of direct COVID-19 mortality demonstrate that states are heterogeneous units and that geographic differences in mortality are present within states.[13, 14] Second, deaths are registered at the county-level.[15] Thus, it is reasonable to assume that administrative differences may exist between counties in the processing and assignment of deaths. For example, a county with a large medical examiner office may have more resources for death investigation than a small coroner's office, resulting in differential assignment to COVID-19. Another important reason to study excess mortality at the local level is that these data are essential for informing community and policy interventions. If a county's direct COVID-19 tallies are substantially underestimated, measuring excess mortality at the county-level may be an important step to appreciating the full burden of the COVID-19 pandemic in an area and allocating response resources appropriately. Additionally, providing accurate data to residents could result in a positive behavior feedback loop, which encourages residents to understand the extent of mortality in their area and take protective actions such as wearing masks and pursuing vaccination. In the event that direct tallies substantially underestimate excess mortality, residents may not accurately assess risk in their area and thus will be less likely to take these steps, resulting in a negative behavior loop that leads to further disease spread throughout their community.[16]

The objective of the present study is to generate valid estimates of excess mortality at the county-level and examine geographic variation in excess mortality and the proportion of excess deaths not assigned to COVID-19. Examining excess deaths at the county-level has the potential to identify counties with high excess mortality but low directly assigned COVID-19 mortality, indicating that COVID-19 is underreported on death certificates or substantial numbers of indirect deaths have occurred in these areas. These counties could represent regions that have been especially hard hit by the COVID-19 pandemic but whose mortality impacts did not appear in direct COVID-19 tallies and whose excess mortality has thus been hidden. In estimating excess mortality at the county-level, this study seeks to provide communities with estimates of the severity of the pandemic in their area which can be used to inform pandemic preparedness and response at the county, state, and national levels.

## 2 Data

We used provisional data from the National Center for Health Statistics (NCHS) on COVID-19 mortality and all-cause mortality by county of residence from January 1 to December 31, 2020 reported by June 3, 2021. We used data with a twenty-two week lag (December 31, 2020 to June 3, 2021) to improve the completeness of data, since prior analysis of provisional NCHS vital statistics reveal low completeness within the month following a death but more than 75 percent completeness after eight-weeks.[17]

COVID-19 deaths were identified using the International Statistical Classification of Diseases and Related Health Problems, Tenth Revision (ICD-10) code *U07.1* and include deaths assigned to COVID-19 as the underlying cause as well as deaths in which COVID-19 was reported as a cause that contributed to death on the death certificate. Prior reports indicate that COVID-19 was assigned as the underlying cause on death certificate in 92% of deaths.[18] For our historical comparison period, we used CDC Wonder data on all-cause mortality by county of residence from 2011 to 2019. To compute death rates, we used data on estimated populations from the U.S. Census Bureau for the years 2011 through 2020.

To assess geographic patterns in mortality, we classify counties on the basis of urbanicity (urban/rural), metropolitan-nonmetropolitan categories (large central metro, large metro suburb, small/medium metro, and nonmetro)[19] and U.S. Census region (West, Northeast, South, and Midwest). The classifications for urbanicity were developed by the US Department of Agriculture (USDA) Economic Research Service (ERS) and modified by the National Center for Health Statistics. Large central metros include counties in metropolitan statistical areas with a population of more than 1 million. Large metro suburbs are counties that surround the large central metros. Small or medium metros include counties in metropolitan statistical areas with a population between 50,000 and 999,999. Nonmetropolitan areas include all other counties. We also examine patterns by 10 modified U.S. Census Divisions. These include the 9 Census Divisions (New England (CT, ME, MA, NH, RI, VT), Middle Atlantic (NJ, NY, PA), East North Central (IL, IN, MI, OH, WI), West North Central (IA, KS, MN, MO, NE, ND, SD), South Atlantic (DE, DC, FL, GA, MD, NC, SC, VA), East South Central (AL, KY, MS, TN), West South Central (AR, LA, OK, TX), Mountain (AZ, CO, ID, MT, NV, NM, UT, WY), and Pacific (AK, CA, HI, OR, WA)) and Appalachia, as defined by the Appalachian Regional Commission to include all of West Virginia and counties from 12 other states. We then stratified these divisions by metropolitan-nonmetropolitan categories to yield 40 distinct geographic units. Further details about these geographic units are provided by Elo et al.[19]

Our provisional data includes 3139 counties with reported all-cause mortality for 2020. We exclude counties for which we do not have mortality information over the entire period from 2011 to 2019, resulting in a final sample of 3,080 counties.

The present investigation relied on de-identified publicly available data and was therefore exempted from review by the Boston University Medical Center Institutional Review Board. Analyses were conducted using STATA 16 and R/R Studio. Additional details about the data along with programming code for replicating the analyses of the present study are available from the linked GitHub repository.

## 3 Methodology

### 3.1 General Model for County-Level Mortality

To generate a prediction of expected mortality in 2020, we estimate a statistical model of mortality using historical mortality data from 2011-2019. Specifically, we model mortality at the county-year level

using a quasi-poisson generalized linear model (QP-GLM) of the following form:<sup>12</sup>

$$E[Y_{it}|\mathbf{Z}_{it}] = \exp(\alpha_i + \phi Y_{t-1} + \delta t + \beta_i t) \quad (1)$$

Here,  $Y_{it}$  denotes the number of all-cause deaths divided by the total population of county  $i$  in year  $t$ . In the linear index, we include a county-specific intercept term,  $\alpha_i$ , which captures latent characteristics of each county that may be correlated with mortality. Importantly, this term picks up relevant information such as the distribution of age and health in each county.<sup>3</sup> We include one lag of the dependent variable,  $Y_{t-1}$ , to capture potential serial correlation in mortality.<sup>4</sup> We include a time trend,  $t$ , and allow the time trend to vary across counties according to  $\beta_i$ . This accounts for demographic and other trends across granular geographies that may affect mortality.

We use the model estimates described above to compute fitted values of total deaths and the death rate per 1000 person-years for each county and year from 2011-2020.<sup>5</sup>

## 3.2 Excess Deaths

We define excess deaths as the difference between the number of predicted all-cause deaths in 2020 and the number of observed all-cause deaths in 2020. For each county in our sample, we produced an excess death rate for 2020 as well as a ratio of observed to expected deaths. Additionally, we compute a z-score-like statistic, which we call adjusted excess deaths, by dividing the excess death estimate by the standard error of the prediction. This adjusts for county-level variation in the precision of expected death estimates.

## 3.3 Excess Deaths Not Assigned to COVID-19

We define excess deaths not assigned to COVID-19 as the difference between the number of excess deaths in 2020 and the number of observed directly assigned COVID-19 deaths in 2020. For each county in our sample, we decomposed the excess death rate into: (1) the observed death rate from COVID-19 and (2) the excess death rate not assigned to COVID-19. Next, we define the proportion of excess deaths assigned to COVID-19 as the ratio of the COVID-19 death rate to the excess death rate.

## 4 Results

Across 3,080 counties in the U.S., we estimated that 437,849 excess deaths occurred in 2020. **Figure 1** shows the distribution of all-cause mortality, excess mortality, and excess mortality not assigned to COVID-19 across counties comparing the year 2020 to the years 2011 through 2019. The distribution of all-cause mortality, excess mortality, and excess mortality not assigned to COVID-19 were all shifted to the right compared to previous years, indicating that mortality was higher in most counties in 2020 than in prior years.

---

<sup>1</sup>See, for example, McCullaugh and Nelder (1989)[20]

<sup>2</sup>Details on how our exact specification was chosen are given in Appendix B

<sup>3</sup>It may be desirable to explicitly include measures of such information to the extent that they vary significantly within counties over time. At present, we exclude such variables as few official county-level estimates of this type of information is presently available for 2020.

<sup>4</sup>There could be positive serial correlation due persistent shocks, such as natural or other disasters, or there could be negative serial correlation due to survivorship bias. Our baseline estimate of  $\phi$  is .011, which suggests that there is positive correlation on average.

<sup>5</sup>We selected 2011 as the first year in our sample by comparing the predictive performance of our baseline Poisson GLM on 2019 mortality using different starting windows from 2009 to 2015.

**Table 1** presents summary statistics of the number of excess deaths across U.S. Census Regions, U.S. Census Divisions, indicators of urbanicity, and metropolitan-nonmetropolitan categories. Among the total excess deaths, 151,160 excess deaths (34.5%) occurred in large metro areas, 94,260 (21.5%) occurred in large fringe metros, 121,835 (27.8%) occurred in small or medium metro areas, and 70,594 (16.1%) occurred in nonmetro areas.

Excess death rates were highest in nonmetro areas (153.2 deaths per 100,000 residents) and large metro areas (148.3 deaths per 100,000 residents) compared to small or medium metro areas (122.3 deaths per 100,000 residents) and large fringe metros (113.0 deaths per 100,000 residents). Across U.S. Census Divisions, excess mortality was highest in the Middle Atlantic (215.5 deaths per 100,000 residents), East South Central (152.7 deaths per 100,000 residents), East North Central (145.2 deaths per 100,000 residents) and West South Central (144.8 deaths per 100,000 residents). **Figure 2** shows observed deaths across counties in the U.S. as a percentage of expected deaths, highlighting counties with higher excess mortality in darker blue. This figure highlights the geographic dispersion of the COVID-19 pandemic, along with areas where excess mortality is notably higher such as the East South Central Division.

Across the metropolitan-nonmetropolitan categories, excess death rates were highest in metro areas in some U.S. Census Divisions (Middle Atlantic, New England, East North Central, and Pacific) while excess death rates were highest in nonmetro areas in other Divisions (West South Central, East South Central, Appalachia, West North Central, South Atlantic, and Mountain). **Figure 3** shows excess death rates for each metropolitan-nonmetropolitan category across U.S. Census Divisions, highlighting the geographic variation in the urban-rural gradient. Metro areas in the Middle Atlantic Division reported the highest excess mortality, with 305 deaths per 100,000 residents. In contrast, nonmetro areas in New England and the Pacific Division had the lowest excess death rates, with 31 deaths per 100,000 residents and 33 deaths per 100,000 residents respectively.

There was also significant variation in the proportion of excess deaths assigned to COVID-19 across counties in the U.S.. **Figure 4** shows the percentage of excess deaths assigned to COVID-19 across counties in the U.S., labeling counties with low assignment (between 25 and 100% of excess deaths not assigned to COVID-19), counties with moderate assignment (between 0 and 25% of excess deaths not assigned to COVID-19), and counties with high assignment (COVID-19 deaths exceed excess deaths). This map indicates that there is lower assignment of excess deaths to COVID-19 in specific U.S. Census Divisions, including East South Central (79.8% assigned to COVID-19), Mountain (81.7% assigned to COVID-19), Pacific (82.7% assigned to COVID-19), and West South Central (83.3% assigned to COVID-19). There is also lower assignment of excess deaths to COVID-19 in large central metro areas (79.6% assigned to COVID-19) compared to nonmetro areas (92.6% assigned to COVID-19).

Throughout the United States, there were also areas where COVID-19 deaths exceeded excess deaths, primarily in the New England Division. In this Division, 128.8% of the predicted excess deaths were assigned to COVID-19. **Appendix Figure A1** shows the proportion of excess deaths assigned to COVID-19 in New England across metropolitan-nonmetropolitan categories. Across all areas in New England, directly assigned COVID-19 deaths exceeded excess deaths. In nonmetro areas in New England, 146% of excess deaths were assigned to COVID-19, 140% in large fringe metro areas, 128% in medium or small metros, and 112% in large central metro areas. **Figure 5** shows the counties in the U.S. with the highest excess mortality rates and the highest proportion of excess deaths not assigned to COVID-19.

**Appendix Figure A2** and **Appendix Figure A3** display a time series of observed death rates from 2011 to 2019 and a comparison of the 2020 predicted death rate and the 2020 expected death rate. In the East South Central region where a relatively larger share of excess deaths were not assigned to COVID-19, the observed death rate in 2020 substantially exceeds the expected 2020 death rate and the expected 2020 death rate plus COVID-19 deaths. In New England, however, where direct COVID-19

deaths exceeded excess deaths, the opposite occurs – with the expected death rate plus COVID-19 deaths exceeding the observed death rate in 2020.

Few areas experienced negative excess mortality (where observed mortality was less than expected mortality). Even fewer among the counties had statistically significant negative excess death rates where the uncertainty intervals for the excess death rates did not overlap with 0. This suggests that most counties across the U.S. experienced positive excess mortality in 2020. **Appendix Table C1** provides estimates of excess death rates and their uncertainty intervals for 3,080 counties across the U.S.. These data are available for download as excess death rates and counts in a .csv file format as **Appendix Spreadsheet C2**.

## 5 Discussion

In this study, we produced county-level estimates of excess mortality and the proportion of excess deaths not assigned to COVID-19 and examined geographic variation in mortality across 3,080 county units throughout the United States. Excess death rates in 2020 were highest in large central metro and nonmetro areas and in the Middle Atlantic, East South Central, East North Central, and West South Central Divisions. The proportion of excess deaths assigned to COVID-19 in 2020 was lowest in large central metro areas and in the East South Central, Mountain, Pacific, and West South Central Divisions. The New England Division was unique in reporting more direct COVID-19 deaths than excess deaths.

Across counties in the U.S., we estimated that 437,849 total excess deaths occurred in 2020. This estimate is similar to an estimate of 458,000 excess deaths in the U.S. during 2020 produced by Islam et al. Recent estimates by Woolf et al. calculated 522,368 excess deaths between March 1, 2020, and January 2, 2021, which is higher than our estimate. Our estimate may be more conservative than Woolf et al. because we incorporated historical data from 2011 through 2019 for our calculations of expected mortality whereas Woolf et al. used trends from 2014 through 2019. Ahmed et al. found an increase of 503,976 deaths between 2019 and 2020, which is also higher than our estimate of excess mortality. However, these estimates were descriptive and did not control for recent mortality trends.

Our study also reveals substantial heterogeneity in excess deaths and the proportion of excess deaths not assigned to COVID-19 across counties, which are the administrative unit for death registration. This highlights the value of studying excess mortality at the county-level since state and national- estimates mask significant variability within states. This finding is in line with studies of excess deaths in California that found significant differences in excess deaths by race/ethnicity and education, which vary by county.[21, 22]

Consistent with previous results, we find evidence of wide gaps between excess mortality and directly assigned COVID-19 mortality in many areas across the United States. There are several potential explanations for the discrepancy between excess mortality and directly assigned COVID-19 mortality. One explanation is that the gap reflects underreporting of COVID-19 deaths. Especially early in the pandemic, testing was severely limited, which may have reduced the likelihood of COVID-19 being assigned to the death certificate. Underreporting may have also related to a lack of awareness of the clinical manifestations of COVID-19 early in the pandemic as well as various social, health care, and political factors.[23, 24, 12] In addition to underreporting, gaps between excess and direct mortality may in part be explained by the indirect effects of the pandemic on mortality levels. Indirect effects could relate to interruptions or delays in health care or the broader social and economic upheaval caused by the pandemic, including loss of employment, social isolation and loneliness, and other factors.[25, 26, 27] Many states have reported increases in overdose deaths during the COVID-19 pandemic, and NCHS data suggest that approximately 19,000 more deaths from unintentional injuries occurred in 2020 than in 2019.[28]

Our study made use of data through December 31, 2020 reported by June 3, 2021, meaning that deaths could be reported for up to five months after they occurred. As a result, our estimate of the proportion of excess deaths not assigned to COVID-19 should be interpreted accordingly, indicating that after accounting for five months of potential reporting and processing delays, 12.4% of excess deaths were still not assigned to COVID-19. It is important to acknowledge that COVID-19 mortality surveillance data sources such as local health system dashboards that the public uses to interact with county-level data in real-time more substantially underestimate excess mortality due to significant delays in COVID-19 reporting that are not accounted for. Similarly, our estimate of the proportion of excess deaths not assigned to COVID-19 (12%) is lower than a previous study using county-level data (17%), which only incorporated a two and a half month delay between occurrence and reporting.

We also observed a number of counties in which the direct COVID-19 death rate exceeded our estimates of excess mortality, especially in New England. This finding could have occurred for several reasons. First, increases in mortality in 2020 due to COVID-19 may have been offset by declines in deaths from other causes. Provisional data on cause of death for 2020 indicates that flu deaths declined significantly relative to prior years, which may explain part of the offset.[29] Other causes of death may also have experienced reductions in 2020. For example NCHS data indicates that there were approximately 2,600 fewer suicide deaths in 2020 relative to 2019.[28] Shelter-in-place policies may have also been associated with reductions in non-natural deaths.[30] Another reason direct deaths may have exceeded our estimates of excess deaths is if medical certifiers in a county over-assigned COVID-19 to death certificates. In addition, the differences could at least partially relate to how directly assigned COVID-19 deaths were counted by NCHS; while COVID-19 was listed as the underlying cause in the vast majority of cases, in about 8% of cases, COVID-19 was listed as a contributing cause and still directly assigned to COVID-19. Finally, frailty selection may have occurred if deaths from COVID-19 occurred among individuals who were likely to die from other causes, resulting in reductions in those causes of death. It is also important to note that in instances where directly assigned COVID-19 deaths exceeded excess deaths in the overall population, patterns could differ among population subgroups related to age, race/ethnicity, and income.

Accurate county-level predictions of excess mortality, and their associated levels of uncertainty, are an important addition to existing work on excess mortality at the state and national level. County-level estimates can enable researchers to examine geographic variation in excess mortality and leverage county-level variation in sociodemographic, health, and structural factors to examine inequities in excess deaths. They may also be relevant to local public health departments, to be used in conjunction with their existing efforts to monitor deaths directly assigned to COVID-19. Accurate death tallies at the county level may play an important role in motivating individual and community responses, including vaccine uptake. Our study indicates that directly assigned COVID-19 death rates have been less accurate measures of excess mortality in areas such as the East South Central and Mountain Divisions, which are also areas that are experiencing the slowest vaccine uptake.[31]

This analysis had several limitations. First, unlike prior state-level analyses which leveraged weekly data on deaths, the present study used cumulative data on COVID-19 and all-cause mortality for all of 2020. Given this limitation in the available data, it was not possible to examine changes in excess mortality over time or trends in the proportion of deaths not assigned to COVID-19 at the county level. Examining trends in excess mortality using small-area data is a priority for future research which may help to distinguish the direct effects of the pandemic from indirect consequences associated with interruptions in health care and the social and economic consequences of pandemic response measures. Second, when considering patterns of excess mortality across the United States, an important caveat is that age structure differs across counties. Since COVID-19 mortality is more common in older populations, some of the patterns observed across counties may simply reflect differences in age structure. Thus, an important

future direction for county-level analyses of excess mortality is to age standardize the estimates when age-specific mortality data become available. Third, the provisional county-level mortality files released by the NCHS did not include information on cause of death, and therefore it was not possible to disentangle the sources of excess deaths in 2020. Decomposing excess deaths by cause of death will be critical to understanding why some counties have a higher fraction of unassigned deaths than others and the extent to which the discrepancies are explained by COVID-19 death undercounts versus indirect pandemic effects. For example, such an analysis might partition natural from non-natural deaths under the assumption that non-natural causes of death are unlikely to represent misascribed COVID-19 deaths. Information on cause of death will also be valuable for understanding the extent to which declines in mortality from other causes have offset COVID-19 deaths, thereby leading to smaller estimates of both excess deaths and the percent of excess deaths that were not assigned to COVID-19. Given the potential for offset from other causes of death, it is likely our overall finding that 12% of excess deaths were not assigned to COVID-19 represents a lower bound on the percent unassigned. Finally, the data used in the present study are provisional in nature and may be subject to further corrections by the NCHS in the process of generating final death counts by cause of death for 2020.

In conclusion, the present study builds on prior work by extending estimates of excess mortality and excess deaths not assigned to COVID-19 to US counties. The added geographic detail of these estimates compared to prior studies may facilitate additional research on the causes and consequences of the COVID-19 pandemic on population health and provide useful data for local area health policy and planning.



## References

- [1] DA Leon, et al., COVID-19: a need for real-time monitoring of weekly excess deaths. *Lancet* **395**, e81 (2020).
- [2] LM Rossen, AM Branum, FB Ahmad, PD Sutton, RN Anderson, Notes from the field: Update on excess deaths associated with the COVID-19 pandemic - united states, january 26, 2020-february 27, 2021. *MMWR Morb. Mortal. Wkly. Rep.* **70**, 570–571 (2021).
- [3] DM Weinberger, et al., Estimation of excess deaths associated with the COVID-19 pandemic in the united states, march to may 2020. *JAMA Intern. Med.* **180**, 1336–1344 (2020).
- [4] SH Woolf, DA Chapman, RT Sabo, EB Zimmerman, Excess deaths from COVID-19 and other causes in the US, march 1, 2020, to january 2, 2021. *JAMA* (2021).
- [5] AC Stokes, et al., COVID-19 and excess mortality in the united states: A county-level analysis. *PLoS Med.* **18**, e1003571 (2021).
- [6] MV Kiang, RA Irizarry, CO Buckee, S Balsari, Every body counts: Measuring mortality from the COVID-19 pandemic. *Ann. Intern. Med.* **173**, 1004–1007 (2020).
- [7] AB Friedman, et al., Delayed emergencies: The composition and magnitude of non-respiratory emergency department visits during the COVID-19 pandemic. *J Am Coll Emerg Physicians Open* **2**, e12349 (2021).
- [8] KP Hartnett, et al., Impact of the COVID-19 pandemic on emergency department visits - united states, january 1, 2019-may 30, 2020. *MMWR Morb. Mortal. Wkly. Rep.* **69**, 699–704 (2020).
- [9] EC Matthay, KA Duchowny, AR Riley, S Galea, Projected All-Cause deaths attributable to COVID-19-Related unemployment in the united states. *Am. J. Public Health* **111**, 696–699 (2021).
- [10] JS Faust, et al., Mortality from drug overdoses, homicides, unintentional injuries, motor vehicle crashes, and suicides during the pandemic, March-August 2020. *JAMA* **326**, 84–86 (2021).
- [11] LE Egede, RJ Walker, Structural racism, social risk factors, and covid-19 - a dangerous convergence for black americans. *N. Engl. J. Med.* **383**, e77 (2020).
- [12] AC Stokes, et al., Association of health care factors with excess deaths not assigned to COVID-19. *JAMA Network Open; Forthcoming* (2021).
- [13] JT Chen, N Krieger, Revealing the unequal burden of COVID-19 by income, Race/Ethnicity, and household crowding: US county versus zip code analyses. *J. Public Health Manag. Pract.* **27 Suppl 1**, **COVID-19 and Public Health: Looking Back, Moing Forward**, S43–S56 (2021).
- [14] SB Tan, P deSouza, M Raifman, Structural racism and COVID-19 in the USA: a County-Level empirical analysis. *J Racial Ethn Health Disparities* (2021).
- [15] I of Medicine, *Medicolegal Death Investigation System: Workshop Summary*. (The National Academies Press, Washington, DC), (2003).
- [16] E Gutierrez, A Rubli, T Tavares, Information and behavioral responses during a pandemic: Evidence from delays in COVID-19 death reports. (2021).

- [17] MR Spencer, F Ahmad, Timeliness of death certificate data for mortality surveillance and provisional estimates. *National Vital Statistics Rapid Release* **001** (2016).
- [18] National Center for Health Statistics, Technical notes: Provisional death counts for coronavirus disease ([https://www.cdc.gov/nchs/nvss/vsrr/covid19/tech\\_notes.htm](https://www.cdc.gov/nchs/nvss/vsrr/covid19/tech_notes.htm))(2021) Accessed : 2021 – 3 – 29.
- [19] IT Elo, AS Hendi, JY Ho, YC Vierboom, SH Preston, Trends in Non-Hispanic white mortality in the united states by Metropolitan-Nonmetropolitan status and region, 1990-2016. *Popul. Dev. Rev.* **45**, 549–583 (2019).
- [20] P McCullagh, J Nelder, Binary data in *Generalized linear models*. (Springer), pp. 98–148 (1989).
- [21] AR Riley, et al., Excess death among latino people in california during the COVID-19 pandemic (2021).
- [22] YH Chen, et al., Excess mortality in california during the coronavirus disease 2019 pandemic, march to august 2020. *JAMA Intern. Med.* (2020).
- [23] M Boukhris, et al., Cardiovascular implications of the COVID-19 pandemic: A global perspective. *Can. J. Cardiol.* **36**, 1068–1080 (2020).
- [24] AC Stokes, et al., Assessing the impact of the covid-19 pandemic on US mortality: A County-Level analysis. *medRxiv* (2020).
- [25] JA Wolfson, CW Leung, Food insecurity and COVID-19: Disparities in early effects for US adults. *Nutrients* **12** (2020).
- [26] SJ Lange, et al., Potential indirect effects of the COVID-19 pandemic on use of emergency departments for acute Life-Threatening conditions — united states, January–May 2020 (2020).
- [27] B Wu, Social isolation and loneliness among older adults in the context of COVID-19: a global challenge. *Glob Health Res Policy* **5**, 27 (2020).
- [28] FB Ahmad, RN Anderson, The leading causes of death in the US for 2020. *JAMA* (2021).
- [29] SJ Olsen, et al., Decreased influenza activity during the COVID-19 pandemic — united states, australia, chile, and south africa, 2020 (2020).
- [30] R Catalano, M Maria Glymour, YH Chen, K Bibbins-Domingo, Sheltering in place and the likelihood of nonnatural death (2021).
- [31] U.S. Department of Health & Human Services, ASPE predictions of vaccine hesitancy for COVID-19 vaccines by geographic and sociodemographic features (<https://aspe.hhs.gov/pdf-report/vaccine-hesitancy>) (2021) Accessed: 2021-5-1.
- [32] C Gourieroux, A Monfort, A Trognon, Pseudo maximum likelihood methods: Theory. *Econometrica: journal of the Econometric Society*, 681–700 (1984).
- [33] JM Wooldridge, Distribution-free estimation of some nonlinear panel data models. *Journal of Econometrics* **90**, 77–97 (1999).
- [34] AC Cameron, PK Trivedi, *Regression analysis of count data*. (Cambridge university press) Vol. 53, (2013).

- [35] A Gelman, J Hill, *Data analysis using regression and multilevel/hierarchical models*. (Cambridge university press), (2006).
- [36] SH Woolf, et al., Excess deaths from COVID-19 and other causes, March-July 2020. *JAMA* **324**, 1562–1564 (2020).

Table 1: Excess All-Cause Mortality and COVID-19 Mortality by US Census Region, Division, and Urbanicity

| Geography                       | Expected Deaths | Observed Deaths | Observed/Expected | Excess Deaths | Excess Per 100,000 | COVID-19 Deaths | COVID-19 to Excess Ratio (%) | N     |
|---------------------------------|-----------------|-----------------|-------------------|---------------|--------------------|-----------------|------------------------------|-------|
| All                             | 2,943,403       | 3,381,252       | 1.15              | 437,849       | 132.3              | 383,442         | 87.6                         | 3,080 |
| <b>Rural/Urban</b>              |                 |                 |                   |               |                    |                 |                              |       |
| Rural                           | 506,725         | 567,667         | 1.12              | 60,942        | 143.6              | 56,344          | 92.5                         | 1,827 |
| Urban                           | 2,436,678       | 2,813,585       | 1.15              | 376,907       | 130.6              | 327,098         | 86.8                         | 1,253 |
| <b>By Metro-Nonmetro Status</b> |                 |                 |                   |               |                    |                 |                              |       |
| Lg central metro                | 750,109         | 901,269         | 1.20              | 151,160       | 148.3              | 120,259         | 79.6                         | 68    |
| Lg fringe metro                 | 689,585         | 783,845         | 1.14              | 94,260        | 113.0              | 89,883          | 95.4                         | 368   |
| Md/Sm metro                     | 955,613         | 1,077,448       | 1.13              | 121,835       | 122.3              | 107,895         | 88.6                         | 728   |
| Nonmetro                        | 548,096         | 618,690         | 1.13              | 70,594        | 153.2              | 65,405          | 92.6                         | 1,916 |
| <b>By US Census Region</b>      |                 |                 |                   |               |                    |                 |                              |       |
| Midwest                         | 668,461         | 765,471         | 1.15              | 97,010        | 141.4              | 87,610          | 90.3                         | 1,035 |
| Northeast                       | 510,822         | 608,496         | 1.19              | 97,674        | 174.0              | 94,534          | 96.8                         | 217   |
| South                           | 1,170,331       | 1,334,653       | 1.14              | 164,322       | 129.3              | 136,375         | 83.0                         | 1,410 |
| West                            | 593,789         | 672,632         | 1.13              | 78,843        | 99.5               | 64,923          | 82.3                         | 418   |
| <b>By US Census Division</b>    |                 |                 |                   |               |                    |                 |                              |       |
| Appalachia                      | 298,527         | 333,516         | 1.12              | 34,989        | 136.0              | 30,437          | 87.0                         | 420   |
| East North Central              | 440,316         | 505,730         | 1.15              | 65,414        | 145.2              | 57,509          | 87.9                         | 405   |
| East South Central              | 118,206         | 135,599         | 1.15              | 17,393        | 152.7              | 13,879          | 79.8                         | 196   |
| Middle Atlantic                 | 292,423         | 366,899         | 1.25              | 74,476        | 215.5              | 66,387          | 89.1                         | 84    |
| Mountain                        | 201,593         | 232,746         | 1.15              | 31,153        | 123.3              | 25,463          | 81.7                         | 265   |
| New England                     | 138,460         | 153,761         | 1.11              | 15,301        | 102.4              | 19,706          | 128.8                        | 67    |
| Pacific                         | 392,196         | 439,886         | 1.12              | 47,690        | 88.3               | 39,460          | 82.7                         | 153   |
| South Atlantic                  | 525,435         | 588,948         | 1.12              | 63,513        | 110.5              | 53,841          | 84.8                         | 433   |
| West North Central              | 202,929         | 231,356         | 1.14              | 28,427        | 131.9              | 27,232          | 95.8                         | 598   |
| West South Central              | 333,318         | 392,811         | 1.18              | 59,493        | 144.8              | 49,528          | 83.3                         | 459   |

*Notes:* Aggregated results by various geographic regions. Aggregate rates are computed by summing actual and predicted counts over counties in a particular region and dividing by the summed population. Note that this is equivalent to the population-weighted means of the county-level rates. COVID-19 deaths refer to deaths that appeared as either an underlying or contributing cause on the death certificate.

Figure 1: Distribution of All-Cause Deaths, Excess Deaths, and Excess Deaths Excluding COVID-19 Deaths per 100,000 Person-Years Across 3,080 U.S. Counties

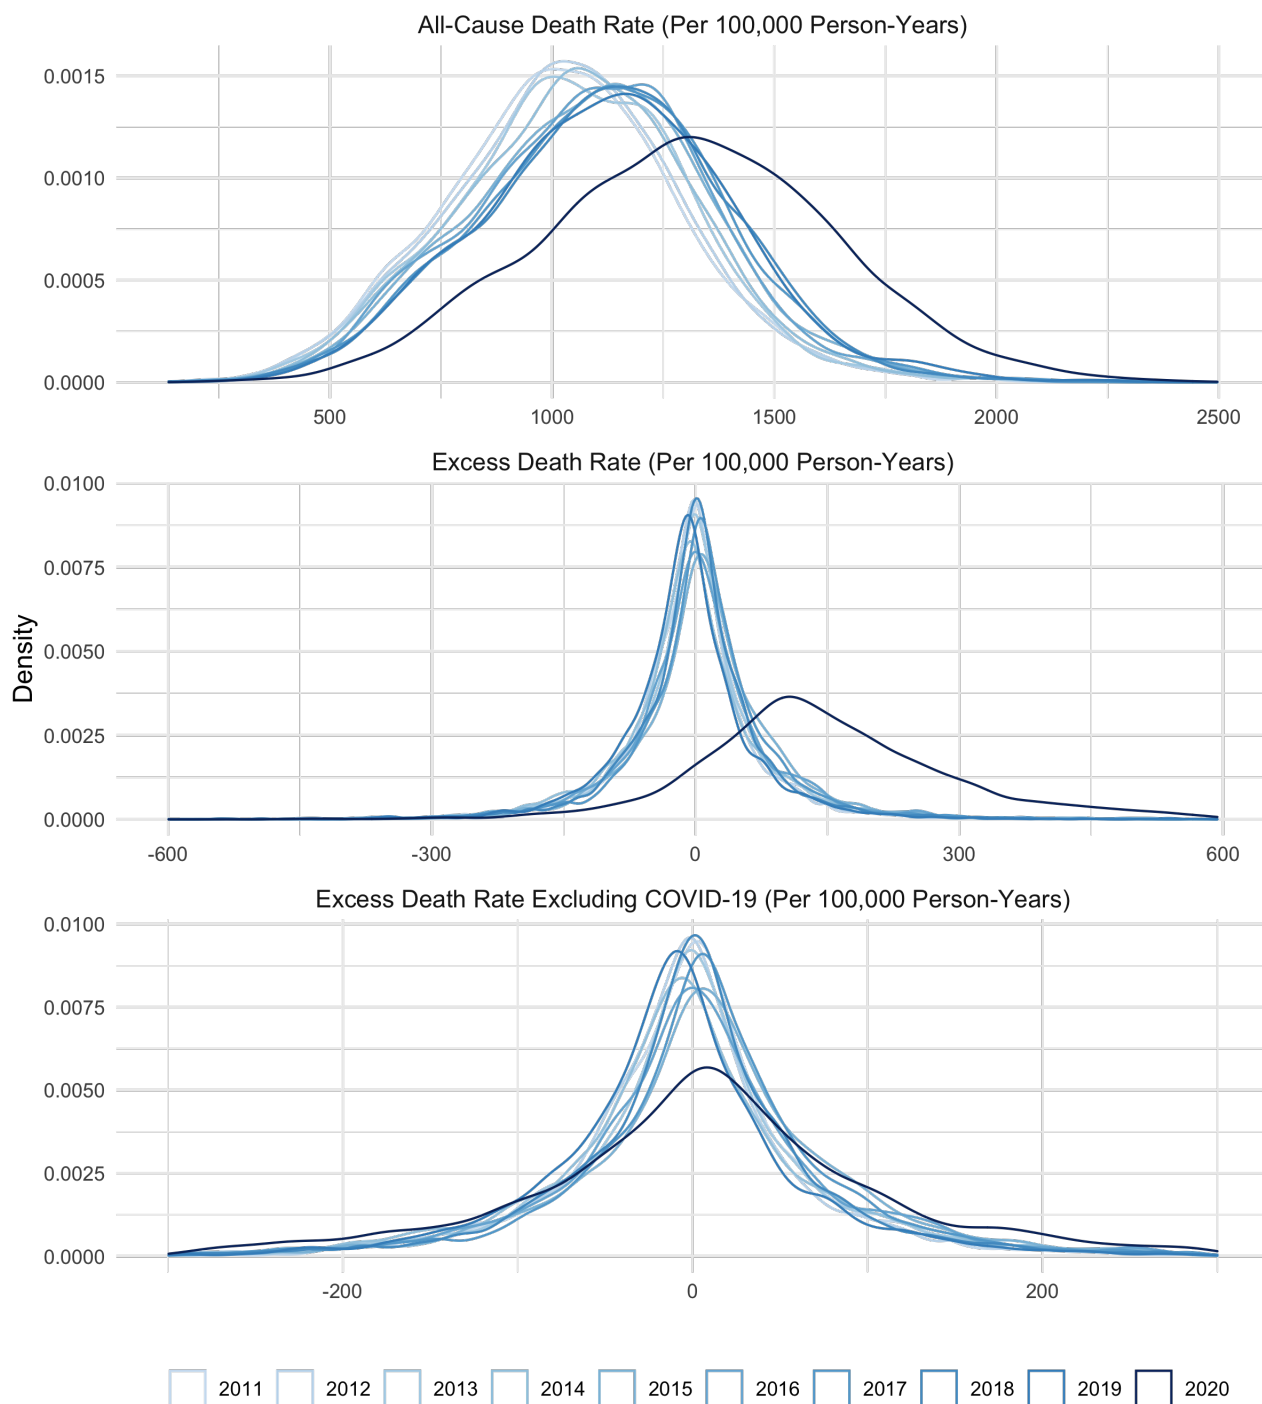

Notes: Expected deaths are computed as the in-sample fitted value for years 2011-2019. For 2020, expected deaths are computed as the out-of-sample fitted value.

Figure 2: Observed All-Cause Deaths as a Percentage of Expected All-Cause Deaths across U.S. Counties

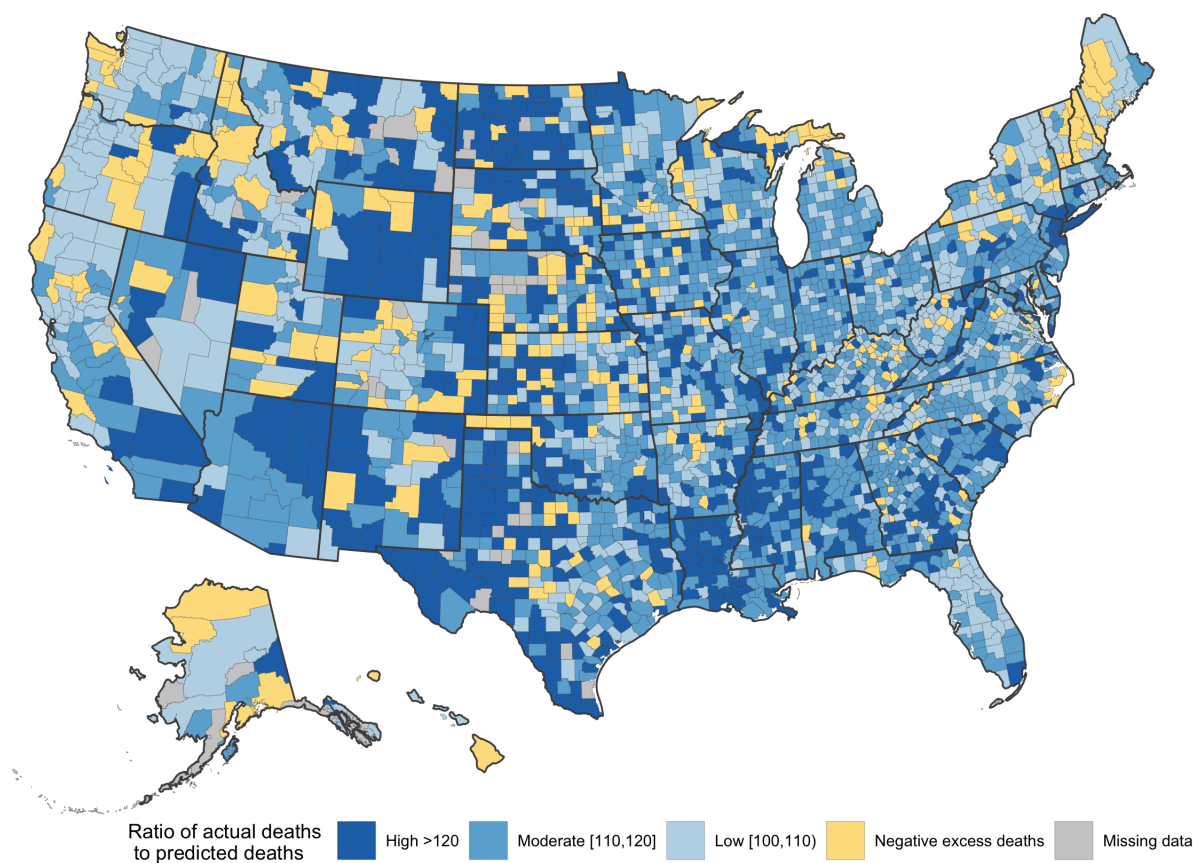

*Notes:* U.S. counties labeled according to the ratio of observed deaths to expected deaths. Negative excess deaths refer to counties in which the expected all-cause death rate in 2020 exceeded the observed all-cause death rate in that year.

Figure 3: Excess All-Cause Deaths per 100,000 Person-Years by U.S. Census Division and Metropolitan Status

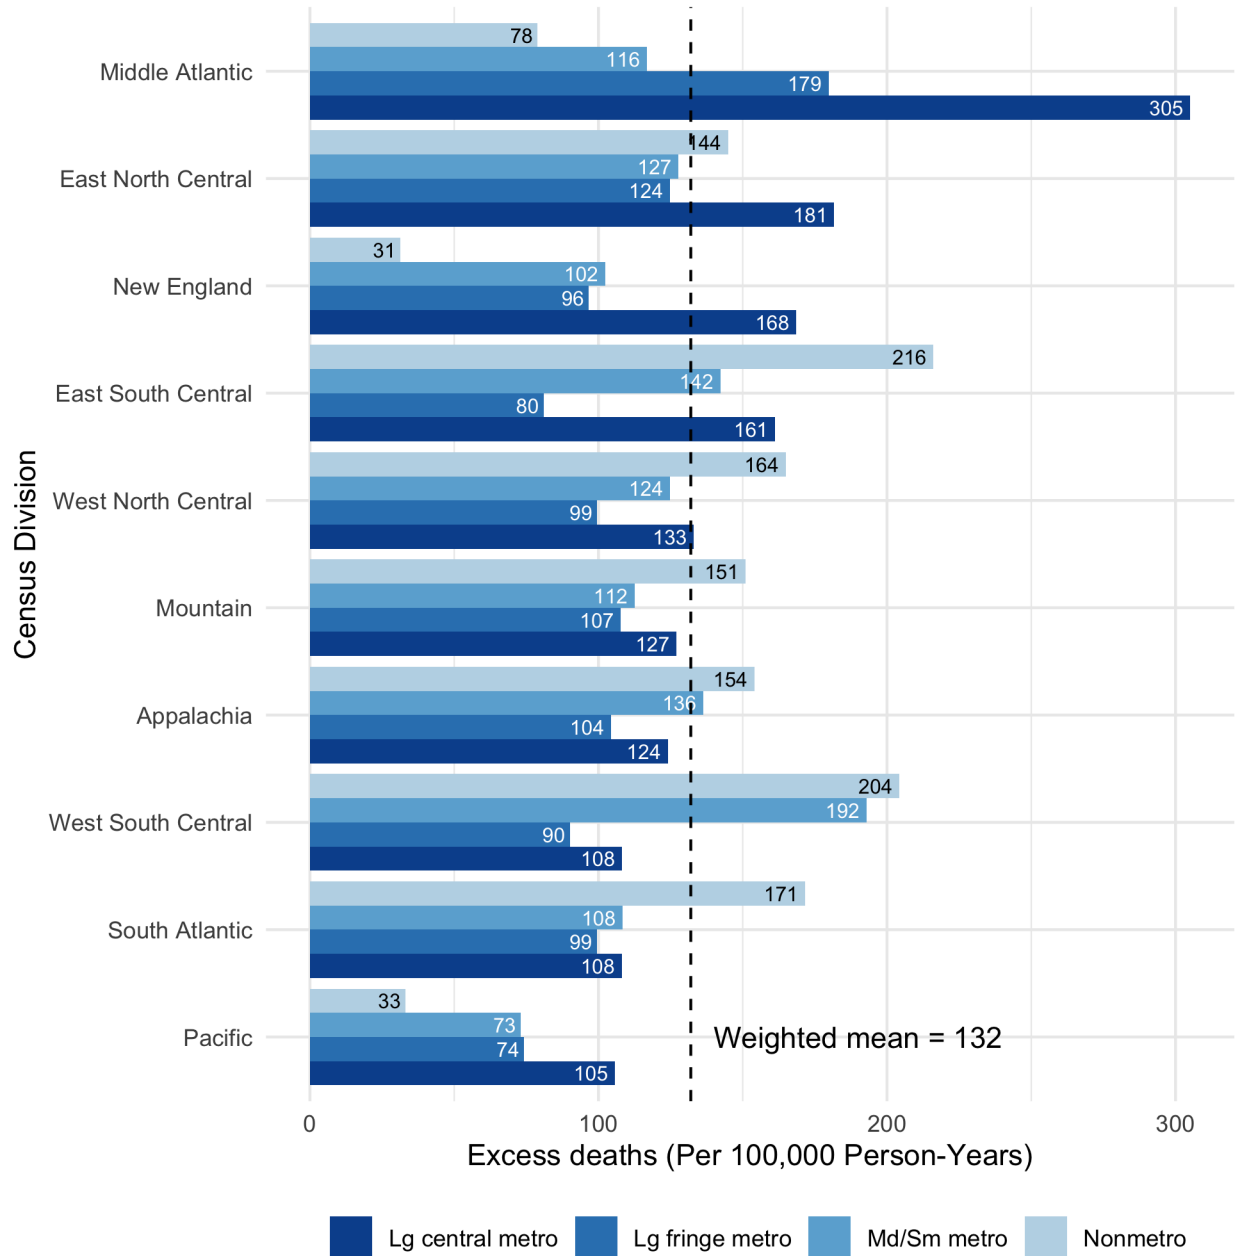

Notes: The weighted mean value indicates the excess all-cause death rate for the US.

Figure 4: Percent of All-Cause Excess Deaths not Assigned to COVID-19 across U.S. Counties

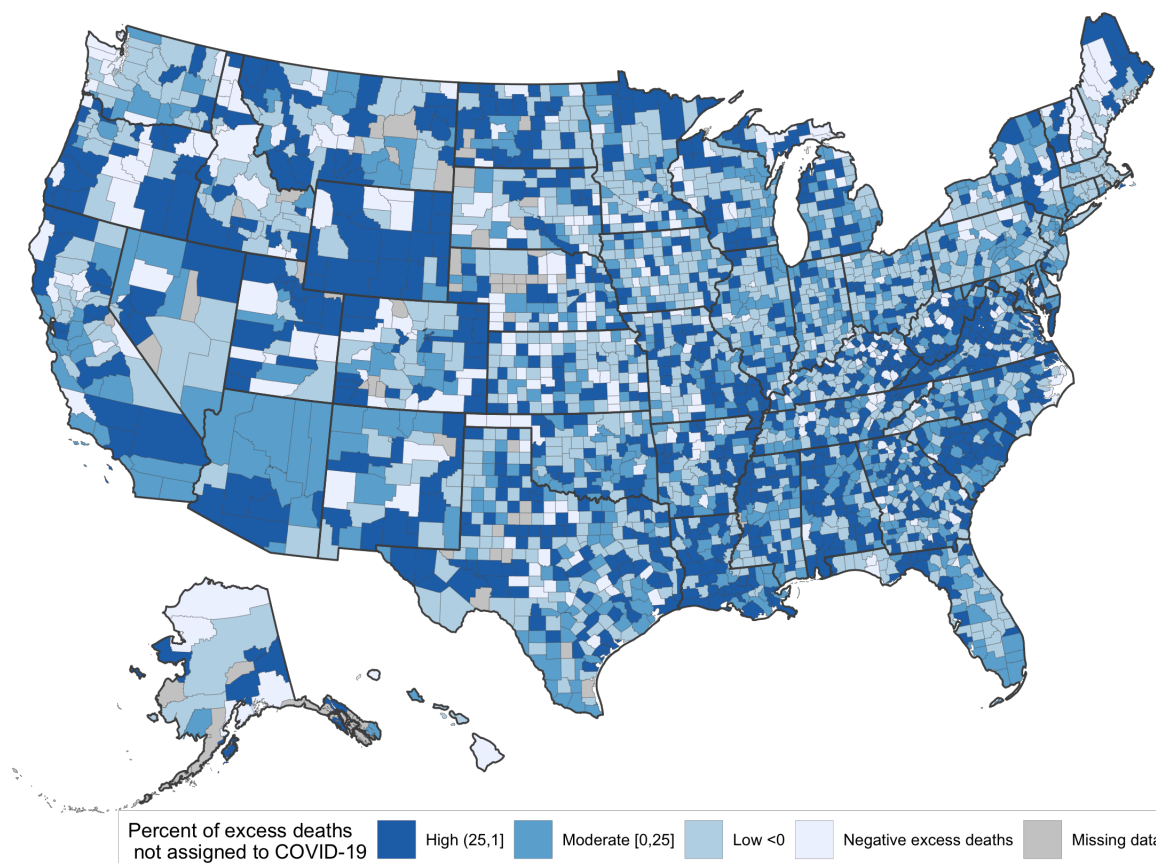

*Notes:* U.S. counties are classified according to the percent of all-cause excess deaths not assigned to COVID-19. Percent values are calculated as one minus the ratio of COVID-19 deaths to excess all-cause deaths. Negative excess deaths refer to counties in which the expected all-cause death rate in 2020 exceeded the observed all-cause death rate in that year.



Figure 5: Decomposition of Excess Deaths for U.S. Counties with High Excess Mortality Rates and Low COVID-19 to Excess Death Ratios

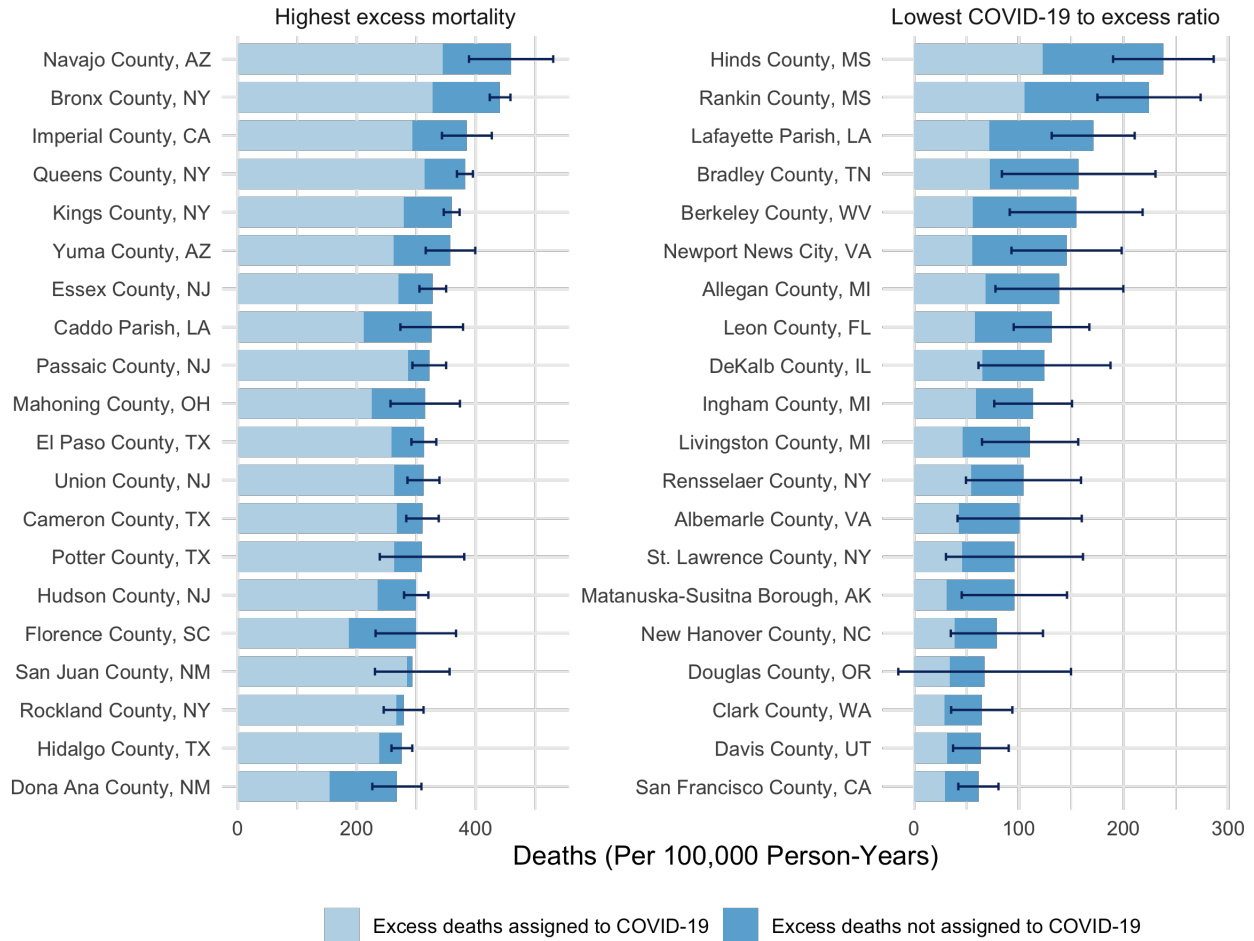

Notes: Decomposition of excess deaths per 100,000 person-years for the counties with the highest excess mortality rates per 100,000 person-years and the lowest COVID-19 to excess death ratios. The selection of counties is restricted to areas with 100,000 or more residents in 2020. For each county, the light blue region reflects excess deaths assigned to COVID-19 and the dark blue region reflects excess deaths not assigned to COVID-19, which is defined as total excess deaths minus direct COVID-19 deaths. The 95% confidence intervals indicate uncertainty in the excess death estimates as calculated by the bootstrapping procedure.

## 6 Appendix A: Tables and Figures

Figure A1: Ratio of COVID-19 Deaths to Excess Deaths by Census Division and Metropolitan Status

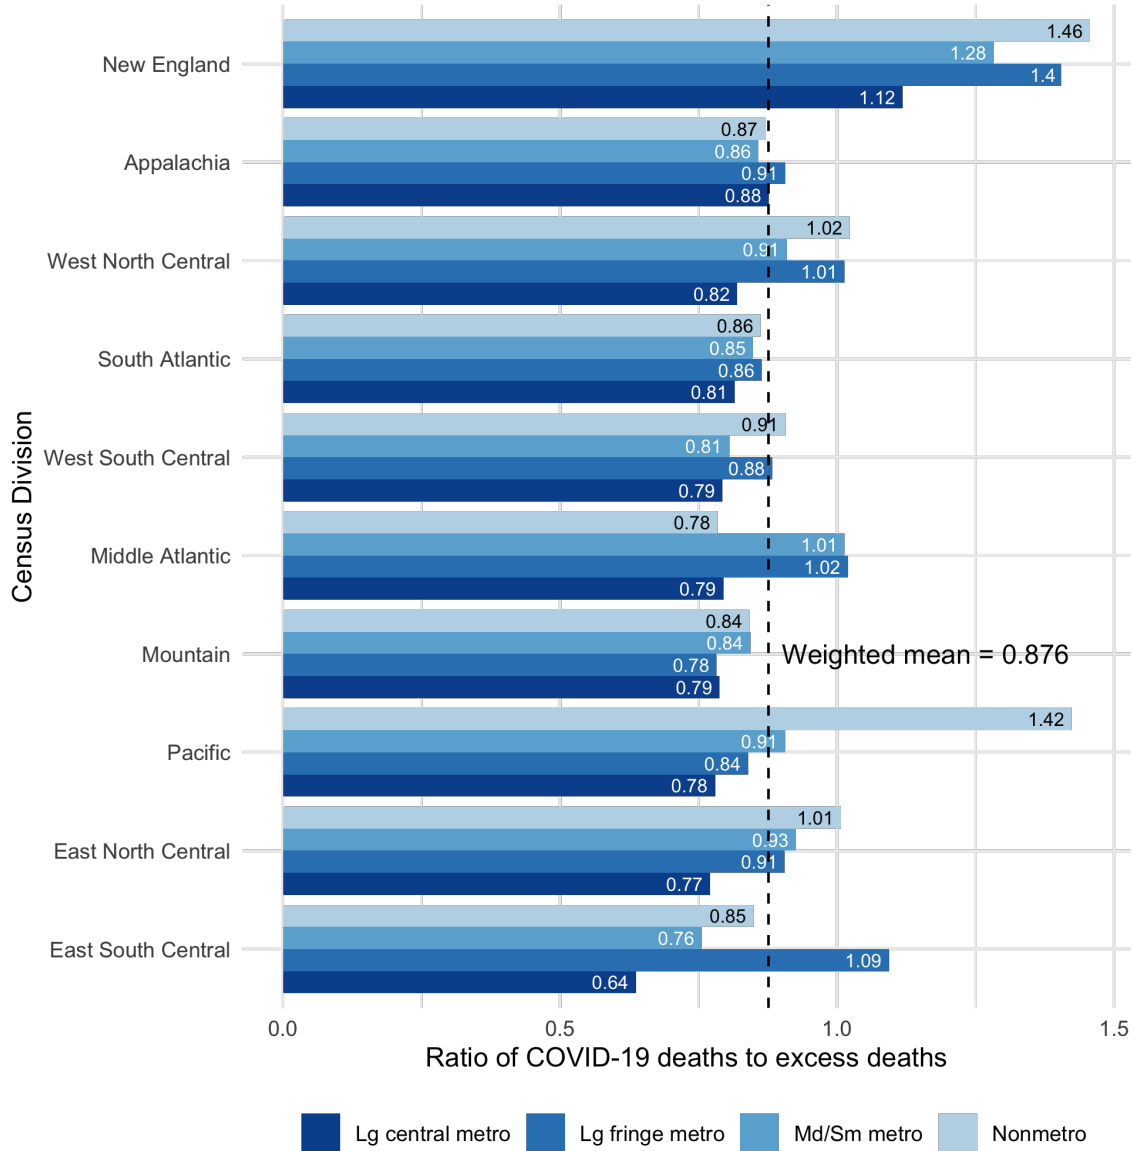

Figure A2: Comparison of Observed and Expected Deaths in Large Counties, 2011-2020

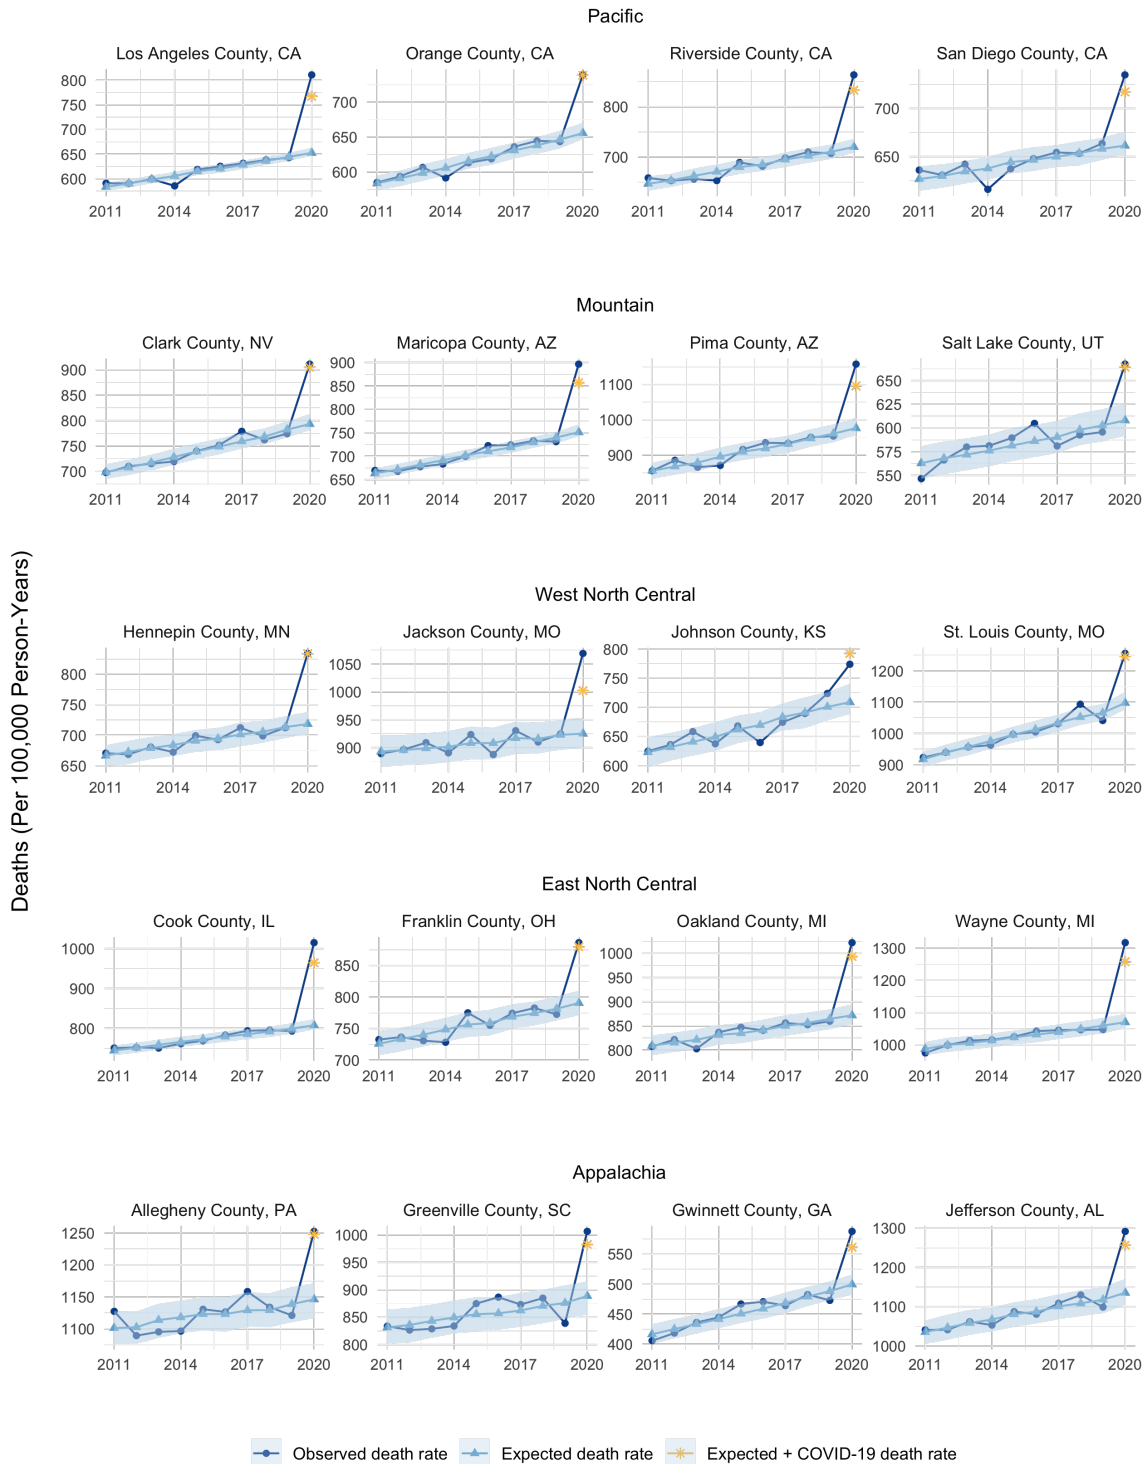

Notes: Observed and expected deaths for largest counties by population in each Census Division from 2011-2020. Expected death counts are generated using a Poisson GLM with data from 2011-2019. The shaded area represents a 95% prediction region for each point. These regions are generated using a parametric bootstrap.

Figure A3: Comparison of Observed and Expected Deaths in Large Counties, 2011-2020

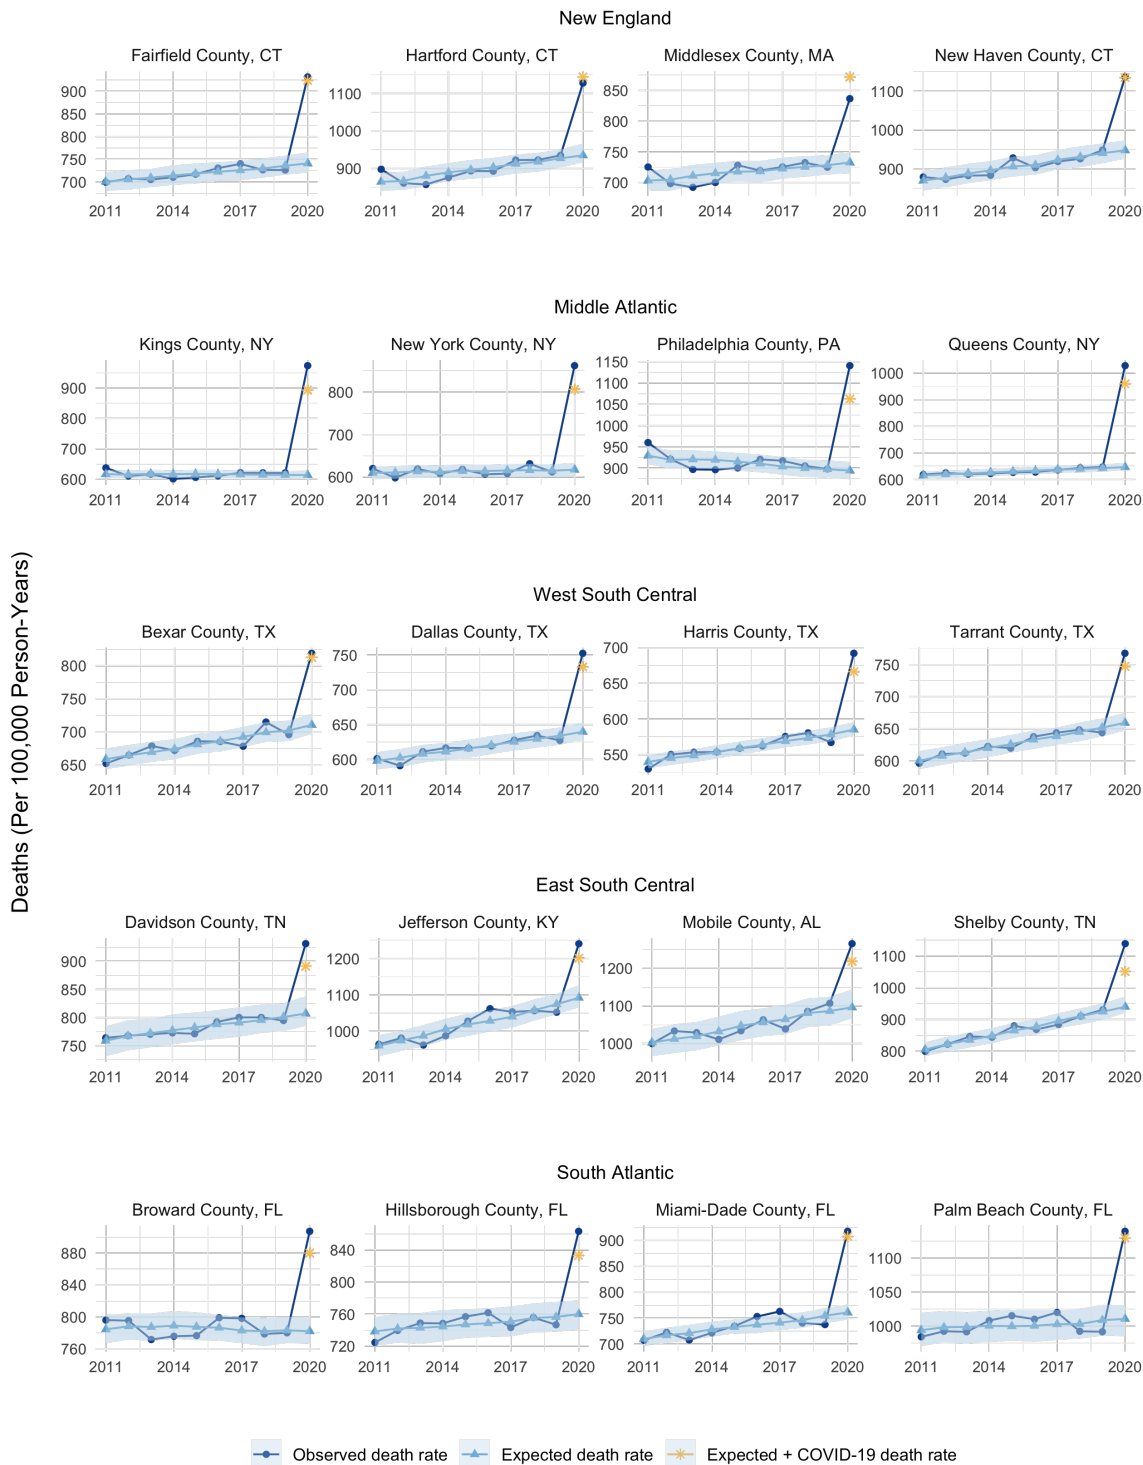

## 7 Appendix B: Details on Model Selection and Estimation

To select our primary specification for a distribution and link function, we computed both in-sample and out-of-sample predictive accuracy for a number of candidate specifications. Specifically, we estimated for three canonical GLM specifications for continuous and count data: Gaussian-identity, Poisson, and gamma models using data from 2010-2018.<sup>6</sup> We then used the estimated model parameters to make out-of-sample predictions of 2019 mortality, and computed the mean-squared prediction error and mean absolute prediction error for each. Some prior studies have used a simple average of mortality in prior years to compute excess mortality in 2020. This has the advantage of being much simpler than fitting a high-dimensional GLM, although it will fail to capture trends, and may overweight more recent years. To gauge the improvement (if any) of using a regression model rather than a prior mean to predict deaths, we compute the predictive accuracy using both a one-year lagged value as well as a six-year prior average. **Table A1** reports the mean squared and mean absolute prediction error, both in-sample and out-of-sample, associated with each model. Unsurprisingly, all of the GLMs provide a much better fit in terms of in-sample deviations than lagged value or prior mean. The GLMs also perform better in predicting mortality rates in 2019. Overall, the Gaussian and Poisson GLMs perform similarly on both metrics, with the Poisson providing a slightly better in-sample fit and the Gaussian a slightly better forecast of 2019. Given these results, and the results of using alternative windows for estimation and prediction, we chose the Poisson specification as our primary specification.<sup>78</sup> To obtain predicted mortality in each county in 2020, we apply our estimated parametric conditional expectation function to 2020 data.

### 7.1 Uncertainty Intervals

We also construct a 95% prediction interval around the predicted death rates for 2020 to help identify counties in which 2020 mortality falls outside the normal range of year-to-year fluctuations. Importantly, while the point estimates of predicted mortality do not depend on the particular variance function assumed, the prediction intervals depend on both the variance of estimated parameters and the variance of outcome variable.<sup>9</sup> To compute the prediction intervals, we first compute cluster-robust standard errors (Wooldridge, 1999)[33] for the individual parameter estimates, and then perform a parametric bootstrap procedure over the parameter and outcome distributions.<sup>10</sup>

---

<sup>6</sup>The negative binomial model was infeasible to estimate with our high-dimensional fixed effects

<sup>7</sup>Using alternative years to predict mortality results in the same general pattern of results, but with the Poisson and Gaussian specifications flip-flopping in terms of out-of-sample accuracy.

<sup>8</sup>It is worth pointing out that, in addition to providing good fit and predictive performance, the Poisson model has attractive robustness properties. Most importantly, achieving consistent parameter estimates does not depend on the assumption of a Poisson distribution. Moreover, our model allows for overdispersion or underdispersion of the outcome variable and there is no restriction on time dependence within clusters. See, for example, Gourieroux, Monfort, and Trognon (1984)[32] and Wooldridge (1999)[33] for details.

<sup>9</sup>In the standard Poisson GLM, the variance of the outcome variable is assumed to be equal to the mean. In practice this is highly restrictive, and so variance functions that permit overdispersion are common. Cameron and Trivedi (2013)[34] detail a number such specifications.

<sup>10</sup>This procedure is based on Gelman and Hill (2006)[35]. Woolf et al. (2020) use a similar procedure in an analogous setting at the state level to generate predictive intervals.[36]

Table B1: Prediction Accuracy of Different Models

|                       | In Sample     |                | Out-of-Sample |                |
|-----------------------|---------------|----------------|---------------|----------------|
|                       | Mean Sq. Err. | Mean Abs. Err. | Mean Sq. Err. | Mean Abs. Err. |
| Prior Year            | 1.704         | 0.894          | 1.913         | 0.933          |
| Prior 6-Year Mean     | 1.190         | 0.763          | 1.792         | 0.979          |
| Gaussian-Identity GLM | 0.725         | 0.560          | 1.627         | 0.838          |
| Poisson GLM           | 0.717         | 0.555          | 1.688         | 0.846          |
| Gamma GLM             | 0.733         | 0.562          | 1.784         | 0.871          |

*Notes:* Mean squared error and mean absolute error of different statistical models of mortality. Models are estimated on annual mortality data from the CDC Wonder database from 2010 to 2018. Predictions and out-of-sample errors are then generated for 2019. Numerous other permutations, including using different window sizes, functional form specifications, and in-sample and out-of-sample windows have been estimated. These alternative specifications generally produce poorer in-sample and out-of-sample fit.

## 8 Appendix C: All Estimates

Table C1 below includes all of our primary estimates for each county. Mortality rates are in units per 100,000 person-years. All-cause and COVID-19 deaths are based on provisional data from the National Center for Health Statistics. Lower CI and upper CI denote the approximate lower and upper bounds on the 95% prediction interval around expected and excess deaths in 2020. Note that the ratio of COVID-19 to excess deaths is negative in some cases, indicating that the point estimate on excess deaths is negative for the county. In these cases the ratio does not have a clear interpretation.

Table C1: Primary Estimates for Each County

| County         | Expected Deaths | Expected Deaths 95% CI | Observed Deaths | Observed/Expected | Excess Deaths | Excess Deaths 95% CI | Excess Deaths Per 100,000 | COVID-19 Deaths | COVID-19 Excess Ratio (%) |
|----------------|-----------------|------------------------|-----------------|-------------------|---------------|----------------------|---------------------------|-----------------|---------------------------|
| Autauga, AL    | 558             | (508,613)              | 651             | 1.17              | 93            | (38,143)             | 166                       | 59              | 63.4                      |
| Baldwin, AL    | 2417            | (2305,2530)            | 2691            | 1.11              | 274           | (161,386)            | 120                       | 179             | 65.3                      |
| Barbour, AL    | 316             | (289,366)              | 378             | 1.20              | 62            | (12,89)              | 255                       | 42              | 67.7                      |
| Bibb, AL       | 267             | (238,311)              | 297             | 1.11              | 30            | (-14,59)             | 136                       | 48              | 160.0                     |
| Blount, AL     | 751             | (713,832)              | 849             | 1.13              | 98            | (17,136)             | 169                       | 97              | 99.0                      |
| Bullock, AL    | 125             | (101,149)              | 149             | 1.19              | 24            | (0,48)               | 238                       | 21              | 87.5                      |
| Butler, AL     | 262             | (227,298)              | 312             | 1.19              | 50            | (14,85)              | 260                       | 55              | 110.0                     |
| Calhoun, AL    | 1571            | (1473,1653)            | 1783            | 1.13              | 212           | (130,310)            | 187                       | 190             | 89.6                      |
| Chambers, AL   | 423             | (378,466)              | 597             | 1.41              | 174           | (131,219)            | 522                       | 81              | 46.6                      |
| Cherokee, AL   | 376             | (337,426)              | 460             | 1.22              | 84            | (34,123)             | 317                       | 41              | 48.8                      |
| Chilton, AL    | 511             | (456,556)              | 630             | 1.23              | 119           | (74,174)             | 269                       | 76              | 63.9                      |
| Choctaw, AL    | 194             | (166,228)              | 188             | 0.97              | -6            | (-40,22)             | -47                       | 33              | NA                        |
| Clarke, AL     | 322             | (302,383)              | 436             | 1.35              | 114           | (53,134)             | 484                       | 45              | 39.5                      |
| Clay, AL       | 170             | (142,201)              | 251             | 1.48              | 81            | (50,109)             | 619                       | 42              | 51.9                      |
| Cleburne, AL   | 208             | (175,243)              | 235             | 1.13              | 27            | (-8,60)              | 178                       | 28              | 103.7                     |
| Coffee, AL     | 575             | (530,639)              | 707             | 1.23              | 132           | (68,177)             | 253                       | 77              | 58.3                      |
| Colbert, AL    | 774             | (717,838)              | 817             | 1.06              | 43            | (-21,100)            | 78                        | 88              | 204.7                     |
| Conecuh, AL    | 175             | (150,209)              | 219             | 1.25              | 44            | (10,69)              | 368                       | 28              | 63.6                      |
| Coosa, AL      | 148             | (119,172)              | 175             | 1.18              | 27            | (3,56)               | 254                       | 22              | 81.5                      |
| Covington, AL  | 583             | (533,642)              | 679             | 1.16              | 96            | (37,146)             | 261                       | 95              | 99.0                      |
| Crenshaw, AL   | 194             | (168,228)              | 249             | 1.28              | 55            | (21,81)              | 400                       | 29              | 52.7                      |
| Cullman, AL    | 1118            | (1055,1205)            | 1259            | 1.13              | 141           | (54,204)             | 167                       | 129             | 91.5                      |
| Dale, AL       | 572             | (525,630)              | 635             | 1.11              | 63            | (5,110)              | 130                       | 92              | 146.0                     |
| Dallas, AL     | 531             | (475,574)              | 632             | 1.19              | 101           | (58,157)             | 276                       | 104             | 103.0                     |
| DeKalb, AL     | 865             | (805,930)              | 1024            | 1.18              | 159           | (94,219)             | 223                       | 130             | 81.8                      |
| Elmore, AL     | 876             | (819,953)              | 1014            | 1.16              | 138           | (61,195)             | 167                       | 102             | 73.9                      |
| Escambia, AL   | 497             | (453,551)              | 602             | 1.21              | 105           | (51,149)             | 290                       | 64              | 61.0                      |
| Etowah, AL     | 1442            | (1350,1522)            | 1687            | 1.17              | 245           | (165,337)            | 241                       | 226             | 92.2                      |
| Fayette, AL    | 227             | (195,258)              | 269             | 1.19              | 42            | (11,74)              | 257                       | 45              | 107.1                     |
| Franklin, AL   | 354             | (314,398)              | 461             | 1.30              | 107           | (63,147)             | 346                       | 54              | 50.5                      |
| Geneva, AL     | 385             | (346,428)              | 467             | 1.21              | 82            | (39,121)             | 314                       | 57              | 69.5                      |
| Greene, AL     | 110             | (83,130)               | 161             | 1.46              | 51            | (31,78)              | 632                       | 21              | 41.2                      |
| Hale, AL       | 195             | (174,238)              | 252             | 1.29              | 57            | (14,78)              | 391                       | 42              | 73.7                      |
| Henry, AL      | 226             | (192,260)              | 267             | 1.18              | 41            | (7,75)               | 236                       | 25              | 61.0                      |
| Houston, AL    | 1207            | (1141,1297)            | 1427            | 1.18              | 220           | (130,286)            | 209                       | 179             | 81.4                      |
| Jackson, AL    | 742             | (688,804)              | 897             | 1.21              | 155           | (93,209)             | 302                       | 71              | 45.8                      |
| Jefferson, AL  | 7479            | (7274,7708)            | 8509            | 1.14              | 1030          | (801,1235)           | 156                       | 798             | 77.5                      |
| Lamar, AL      | 191             | (161,220)              | 249             | 1.30              | 58            | (29,88)              | 423                       | 50              | 86.2                      |
| Lauderdale, AL | 1149            | (1084,1228)            | 1335            | 1.16              | 186           | (107,251)            | 202                       | 136             | 73.1                      |
| Lawrence, AL   | 420             | (376,465)              | 526             | 1.25              | 106           | (61,150)             | 324                       | 66              | 62.3                      |
| Lee, AL        | 1220            | (1161,1322)            | 1307            | 1.07              | 87            | (-15,146)            | 52                        | 153             | 175.9                     |
| Limestone, AL  | 909             | (846,979)              | 1085            | 1.19              | 176           | (106,239)            | 175                       | 105             | 59.7                      |
| Lowndes, AL    | 143             | (122,175)              | 178             | 1.24              | 35            | (3,56)               | 360                       | 41              | 117.1                     |
| Macon, AL      | 260             | (234,307)              | 319             | 1.23              | 59            | (12,85)              | 333                       | 45              | 76.3                      |
| Madison, AL    | 3588            | (3485,3742)            | 3763            | 1.05              | 175           | (21,278)             | 47                        | 232             | 132.6                     |
| Marengo, AL    | 294             | (265,340)              | 332             | 1.13              | 38            | (-8,67)              | 206                       | 35              | 92.1                      |
| Marion, AL     | 424             | (381,468)              | 533             | 1.26              | 109           | (65,152)             | 367                       | 67              | 61.5                      |
| Marshall, AL   | 1207            | (1128,1290)            | 1414            | 1.17              | 207           | (124,286)            | 213                       | 157             | 75.8                      |
| Mobile, AL     | 4516            | (4400,4709)            | 5214            | 1.15              | 698           | (505,814)            | 169                       | 503             | 72.1                      |
| Monroe, AL     | 279             | (244,317)              | 332             | 1.19              | 53            | (15,88)              | 257                       | 30              | 56.6                      |
| Montgomery, AL | 2175            | (2065,2282)            | 2771            | 1.27              | 596           | (489,706)            | 267                       | 356             | 59.7                      |
| Morgan, AL     | 1461            | (1399,1567)            | 1735            | 1.19              | 274           | (168,336)            | 229                       | 180             | 65.7                      |
| Perry, AL      | 119             | (99,147)               | 169             | 1.42              | 50            | (22,70)              | 569                       | 28              | 56.0                      |
| Pickens, AL    | 225             | (200,264)              | 329             | 1.46              | 104           | (65,129)             | 534                       | 41              | 39.4                      |
| Pike, AL       | 323             | (293,366)              | 426             | 1.32              | 103           | (60,133)             | 311                       | 47              | 45.6                      |
| Randolph, AL   | 327             | (281,364)              | 358             | 1.09              | 31            | (-6,77)              | 136                       | 56              | 180.6                     |
| Russell, AL    | 675             | (613,737)              | 750             | 1.11              | 75            | (13,137)             | 126                       | 77              | 102.7                     |
| St. Clair, AL  | 1027            | (962,1105)             | 1221            | 1.19              | 194           | (116,259)            | 215                       | 142             | 73.2                      |
| Shelby, AL     | 1623            | (1555,1741)            | 1841            | 1.13              | 218           | (100,286)            | 99                        | 159             | 72.9                      |
| Sumter, AL     | 162             | (138,192)              | 191             | 1.18              | 29            | (-1,53)              | 231                       | 27              | 93.1                      |
| Talladega, AL  | 1044            | (973,1113)             | 1194            | 1.14              | 150           | (81,221)             | 189                       | 137             | 91.3                      |
| Tallapoosa, AL | 573             | (549,659)              | 628             | 1.10              | 55            | (-31,79)             | 137                       | 80              | 145.5                     |
| Tuscaloosa, AL | 1821            | (1715,1904)            | 2205            | 1.21              | 384           | (301,490)            | 182                       | 265             | 69.0                      |
| Walker, AL     | 1064            | (982,1129)             | 1299            | 1.22              | 235           | (170,317)            | 372                       | 172             | 73.2                      |



Table C1: Primary Estimates for Each County

| County                   | Expected Deaths | Expected Deaths 95% CI | Observed Deaths | Observed/Expected | Excess Deaths | Excess Deaths 95% CI | Excess Deaths Per 100,000 | COVID-19 Deaths | COVID-19 Excess Ratio (%) |
|--------------------------|-----------------|------------------------|-----------------|-------------------|---------------|----------------------|---------------------------|-----------------|---------------------------|
| Washington, AL           | 201             | (166,231)              | 209             | 1.04              | 8             | (-22,43)             | 50                        | 25              | 312.5                     |
| Wilcox, AL               | 155             | (130,185)              | 167             | 1.08              | 12            | (-18,37)             | 115                       | 23              | 191.7                     |
| Winston, AL              | 324             | (288,368)              | 380             | 1.17              | 56            | (12,92)              | 238                       | 41              | 73.2                      |
| Anchorage, AK            | 1835            | (1763,1951)            | 2076            | 1.13              | 241           | (125,313)            | 84                        | 139             | 57.7                      |
| Bethel, AK               | 133             | (109,160)              | 144             | 1.08              | 11            | (-16,35)             | 60                        | 15              | 136.4                     |
| Dillingham, AK           | 41              | (28,57)                | 46              | 1.12              | 5             | (-11,18)             | 98                        | 5               | 100.0                     |
| Fairbanks North Star, AK | 495             | (450,544)              | 544             | 1.10              | 49            | (0,94)               | 50                        | 21              | 42.9                      |
| Haines, AK               | 10              | (4,17)                 | 24              | 2.40              | 14            | (7,20)               | 586                       | 0               | 0.0                       |
| Juneau, AK               | 195             | (166,228)              | 207             | 1.06              | 12            | (-21,41)             | 37                        | 5               | 41.7                      |
| Kenai Peninsula, AK      | 504             | (453,549)              | 470             | 0.93              | -34           | (-79,17)             | -58                       | 21              | NA                        |
| Ketchikan Gateway, AK    | 102             | (81,130)               | 108             | 1.06              | 6             | (-22,27)             | 43                        | 5               | 83.3                      |
| Kodiak Island, AK        | 64              | (48,82)                | 76              | 1.19              | 12            | (-6,28)              | 92                        | 5               | 41.7                      |
| Matanuska-Susitna, AK    | 656             | (604,715)              | 761             | 1.16              | 105           | (46,157)             | 95                        | 34              | 32.4                      |
| Nome, AK                 | 76              | (60,99)                | 83              | 1.09              | 7             | (-16,23)             | 69                        | 0               | 0.0                       |
| North Slope, AK          | 59              | (42,76)                | 54              | 0.92              | -5            | (-22,12)             | -50                       | 5               | NA                        |
| Northwest Arctic, AK     | 63              | (49,82)                | 57              | 0.90              | -6            | (-25,8)              | -80                       | 5               | NA                        |
| Sitka, AK                | 62              | (44,79)                | 64              | 1.03              | 2             | (-15,20)             | 23                        | 0               | 0.0                       |
| Southeast Fairbanks, AK  | 53              | (38,72)                | 68              | 1.28              | 15            | (-4,30)              | 215                       | 5               | 33.3                      |
| Valdez-Cordova, AK       | 65              | (48,84)                | 59              | 0.91              | -6            | (-25,11)             | -66                       | 5               | NA                        |
| Yukon-Koyukuk, AK        | 52              | (37,67)                | 54              | 1.04              | 2             | (-13,17)             | 39                        | 5               | 250.0                     |
| Apache, AZ               | 784             | (728,853)              | 1172            | 1.49              | 388           | (319,444)            | 537                       | 315             | 81.2                      |
| Cochise, AZ              | 1493            | (1430,1609)            | 1634            | 1.09              | 141           | (25,204)             | 110                       | 181             | 128.4                     |
| Coconino, AZ             | 926             | (866,996)              | 1178            | 1.27              | 252           | (182,312)            | 174                       | 219             | 86.9                      |
| Gila, AZ                 | 841             | (776,903)              | 975             | 1.16              | 134           | (72,199)             | 246                       | 131             | 97.8                      |
| Graham, AZ               | 324             | (291,368)              | 383             | 1.18              | 59            | (15,92)              | 150                       | 54              | 91.5                      |
| Greenlee, AZ             | 60              | (44,79)                | 75              | 1.25              | 15            | (-4,31)              | 158                       | 5               | 33.3                      |
| La Paz, AZ               | 351             | (319,403)              | 365             | 1.04              | 14            | (-38,46)             | 65                        | 36              | 257.1                     |
| Maricopa, AZ             | 34320           | (33940,35057)          | 40958           | 1.19              | 6638          | (5901,7018)          | 145                       | 4829            | 72.7                      |
| Mohave, AZ               | 3651            | (3554,3840)            | 4041            | 1.11              | 390           | (201,487)            | 182                       | 363             | 93.1                      |
| Navajo, AZ               | 1217            | (1184,1338)            | 1737            | 1.43              | 520           | (399,553)            | 460                       | 390             | 75.0                      |
| Pima, AZ                 | 10372           | (10174,10678)          | 12296           | 1.19              | 1924          | (1618,2122)          | 181                       | 1268            | 65.9                      |
| Pinal, AZ                | 3620            | (3482,3747)            | 4291            | 1.19              | 671           | (544,809)            | 140                       | 431             | 64.2                      |
| Santa Cruz, AZ           | 316             | (281,364)              | 464             | 1.47              | 148           | (100,183)            | 320                       | 112             | 75.7                      |
| Yavapai, AZ              | 3353            | (3205,3501)            | 3719            | 1.11              | 366           | (218,514)            | 153                       | 280             | 76.5                      |
| Yuma, AZ                 | 1678            | (1603,1783)            | 2453            | 1.46              | 775           | (670,850)            | 357                       | 568             | 73.3                      |
| Arkansas, AR             | 250             | (224,293)              | 308             | 1.23              | 58            | (15,84)              | 331                       | 25              | 43.1                      |
| Ashley, AR               | 271             | (238,309)              | 310             | 1.14              | 39            | (1,72)               | 200                       | 22              | 56.4                      |
| Baxter, AR               | 705             | (648,769)              | 835             | 1.18              | 130           | (66,187)             | 308                       | 80              | 61.5                      |
| Benton, AR               | 2004            | (1901,2103)            | 2301            | 1.15              | 297           | (198,400)            | 104                       | 294             | 99.0                      |
| Boone, AR                | 476             | (429,526)              | 552             | 1.16              | 76            | (26,123)             | 203                       | 68              | 89.5                      |
| Bradley, AR              | 153             | (127,182)              | 185             | 1.21              | 32            | (3,58)               | 292                       | 28              | 87.5                      |
| Calhoun, AR              | 90              | (74,117)               | 83              | 0.92              | -7            | (-34,9)              | -130                      | 5               | NA                        |
| Carroll, AR              | 352             | (313,397)              | 386             | 1.10              | 34            | (-11,73)             | 118                       | 39              | 114.7                     |
| Chicot, AR               | 146             | (125,183)              | 168             | 1.15              | 22            | (-15,43)             | 219                       | 30              | 136.4                     |
| Clark, AR                | 232             | (199,265)              | 302             | 1.30              | 70            | (37,103)             | 321                       | 21              | 30.0                      |
| Clay, AR                 | 244             | (212,278)              | 260             | 1.07              | 16            | (-18,48)             | 109                       | 31              | 193.8                     |
| Cleburne, AR             | 390             | (346,436)              | 425             | 1.09              | 35            | (-11,79)             | 141                       | 39              | 111.4                     |
| Cleveland, AR            | 112             | (90,137)               | 126             | 1.12              | 14            | (-11,36)             | 182                       | 21              | 150.0                     |
| Columbia, AR             | 275             | (236,308)              | 364             | 1.32              | 89            | (56,128)             | 384                       | 44              | 49.4                      |
| Conway, AR               | 300             | (262,339)              | 288             | 0.96              | -12           | (-51,26)             | -57                       | 13              | NA                        |
| Craighead, AR            | 993             | (924,1070)             | 1183            | 1.19              | 190           | (113,259)            | 170                       | 135             | 71.1                      |
| Crawford, AR             | 676             | (620,737)              | 785             | 1.16              | 109           | (48,165)             | 169                       | 65              | 59.6                      |
| Crittenden, AR           | 526             | (491,587)              | 638             | 1.21              | 112           | (51,147)             | 235                       | 90              | 80.4                      |
| Cross, AR                | 245             | (216,285)              | 260             | 1.06              | 15            | (-25,44)             | 92                        | 34              | 226.7                     |
| Dallas, AR               | 111             | (89,135)               | 126             | 1.14              | 15            | (-9,37)              | 219                       | 15              | 100.0                     |
| Desha, AR                | 174             | (141,199)              | 175             | 1.01              | 1             | (-24,34)             | 9                         | 14              | 1400.0                    |
| Drew, AR                 | 232             | (199,265)              | 283             | 1.22              | 51            | (18,84)              | 280                       | 25              | 49.0                      |
| Faulkner, AR             | 1104            | (1046,1192)            | 1122            | 1.02              | 18            | (-70,76)             | 14                        | 92              | 511.1                     |
| Franklin, AR             | 231             | (200,265)              | 273             | 1.18              | 42            | (8,73)               | 237                       | 28              | 66.7                      |
| Fulton, AR               | 204             | (176,241)              | 220             | 1.08              | 16            | (-21,44)             | 127                       | 37              | 231.2                     |
| Garland, AR              | 1471            | (1393,1568)            | 1604            | 1.09              | 133           | (36,211)             | 132                       | 152             | 114.3                     |
| Grant, AR                | 208             | (184,249)              | 227             | 1.09              | 19            | (-22,43)             | 103                       | 18              | 94.7                      |
| Greene, AR               | 516             | (467,567)              | 573             | 1.11              | 57            | (6,106)              | 124                       | 61              | 107.0                     |
| Hempstead, AR            | 252             | (221,292)              | 268             | 1.06              | 16            | (-24,47)             | 75                        | 21              | 131.2                     |

Table C1: Primary Estimates for Each County

| County           | Expected Deaths | Expected Deaths 95% CI | Observed Deaths | Observed/Expected | Excess Deaths | Excess Deaths 95% CI | Excess Deaths Per 100,000 | COVID-19 Deaths | COVID-19 to Excess Ratio (%) |
|------------------|-----------------|------------------------|-----------------|-------------------|---------------|----------------------|---------------------------|-----------------|------------------------------|
| Hot Spring, AR   | 463             | (416,513)              | 519             | 1.12              | 56            | (6,103)              | 165                       | 59              | 105.4                        |
| Howard, AR       | 178             | (149,205)              | 195             | 1.10              | 17            | (-10,46)             | 128                       | 21              | 123.5                        |
| Independence, AR | 429             | (376,471)              | 529             | 1.23              | 100           | (58,153)             | 262                       | 83              | 83.0                         |
| Izard, AR        | 209             | (178,242)              | 222             | 1.06              | 13            | (-20,44)             | 97                        | 16              | 123.1                        |
| Jackson, AR      | 227             | (196,261)              | 292             | 1.29              | 65            | (31,96)              | 398                       | 29              | 44.6                         |
| Jefferson, AR    | 840             | (774,907)              | 1032            | 1.23              | 192           | (125,258)            | 291                       | 139             | 72.4                         |
| Johnson, AR      | 293             | (257,338)              | 316             | 1.08              | 23            | (-22,59)             | 84                        | 22              | 95.7                         |
| Lafayette, AR    | 97              | (84,128)               | 131             | 1.35              | 34            | (3,47)               | 530                       | 12              | 35.3                         |
| Lawrence, AR     | 247             | (219,286)              | 279             | 1.13              | 32            | (-7,60)              | 198                       | 36              | 112.5                        |
| Lee, AR          | 112             | (94,138)               | 175             | 1.56              | 63            | (37,81)              | 727                       | 18              | 28.6                         |
| Lincoln, AR      | 164             | (141,197)              | 186             | 1.13              | 22            | (-11,45)             | 167                       | 29              | 131.8                        |
| Little River, AR | 181             | (156,212)              | 227             | 1.25              | 46            | (15,71)              | 377                       | 39              | 84.8                         |
| Logan, AR        | 305             | (268,345)              | 341             | 1.12              | 36            | (-4,73)              | 166                       | 15              | 41.7                         |
| Lonoke, AR       | 737             | (684,800)              | 804             | 1.09              | 67            | (4,120)              | 89                        | 88              | 131.3                        |
| Madison, AR      | 217             | (178,246)              | 186             | 0.86              | -31           | (-60,8)              | -185                      | 11              | NA                           |
| Marion, AR       | 296             | (252,327)              | 331             | 1.12              | 35            | (4,79)               | 203                       | 25              | 71.4                         |
| Miller, AR       | 528             | (481,585)              | 597             | 1.13              | 69            | (12,116)             | 160                       | 65              | 94.2                         |
| Mississippi, AR  | 522             | (485,588)              | 670             | 1.28              | 148           | (82,185)             | 373                       | 93              | 62.8                         |
| Monroe, AR       | 137             | (115,165)              | 138             | 1.01              | 1             | (-27,23)             | 15                        | 11              | 1100.0                       |
| Montgomery, AR   | 143             | (117,170)              | 164             | 1.15              | 21            | (-6,47)              | 235                       | 21              | 100.0                        |
| Nevada, AR       | 122             | (97,147)               | 131             | 1.07              | 9             | (-16,34)             | 108                       | 24              | 266.7                        |
| Newton, AR       | 104             | (81,124)               | 144             | 1.38              | 40            | (20,63)              | 517                       | 19              | 47.5                         |
| Ouachita, AR     | 344             | (312,393)              | 397             | 1.15              | 53            | (4,85)               | 229                       | 40              | 75.5                         |
| Perry, AR        | 133             | (112,161)              | 140             | 1.05              | 7             | (-21,28)             | 67                        | 11              | 157.1                        |
| Phillips, AR     | 237             | (204,271)              | 310             | 1.31              | 73            | (39,106)             | 429                       | 39              | 53.4                         |
| Pike, AR         | 144             | (120,172)              | 152             | 1.06              | 8             | (-20,32)             | 76                        | 18              | 225.0                        |
| Poinsett, AR     | 356             | (316,400)              | 419             | 1.18              | 63            | (19,103)             | 266                       | 56              | 88.9                         |
| Polk, AR         | 287             | (253,329)              | 309             | 1.08              | 22            | (-20,56)             | 111                       | 56              | 254.5                        |
| Pope, AR         | 643             | (593,699)              | 768             | 1.19              | 125           | (69,175)             | 193                       | 65              | 52.0                         |
| Prairie, AR      | 112             | (91,138)               | 154             | 1.38              | 42            | (16,63)              | 543                       | 15              | 35.7                         |
| Pulaski, AR      | 3901            | (3778,4080)            | 4479            | 1.15              | 578           | (399,701)            | 148                       | 394             | 68.2                         |
| Randolph, AR     | 275             | (235,310)              | 292             | 1.06              | 17            | (-18,57)             | 91                        | 45              | 264.7                        |
| St. Francis, AR  | 261             | (228,297)              | 316             | 1.21              | 55            | (19,88)              | 225                       | 36              | 65.5                         |
| Saline, AR       | 1299            | (1226,1395)            | 1316            | 1.01              | 17            | (-79,90)             | 14                        | 119             | 700.0                        |
| Scott, AR        | 143             | (123,174)              | 168             | 1.17              | 25            | (-6,45)              | 245                       | 17              | 68.0                         |
| Searcy, AR       | 122             | (101,150)              | 122             | 1.00              | 0             | (-28,21)             | 0                         | 15              | Inf                          |
| Sebastian, AR    | 1356            | (1278,1449)            | 1569            | 1.16              | 213           | (120,291)            | 167                       | 136             | 63.8                         |
| Sevier, AR       | 155             | (129,183)              | 209             | 1.35              | 54            | (26,80)              | 315                       | 34              | 63.0                         |
| Sharp, AR        | 311             | (276,358)              | 300             | 0.96              | -11           | (-58,24)             | -62                       | 27              | NA                           |
| Stone, AR        | 175             | (145,209)              | 226             | 1.29              | 51            | (17,81)              | 414                       | 31              | 60.8                         |
| Union, AR        | 545             | (495,597)              | 629             | 1.15              | 84            | (32,134)             | 218                       | 80              | 95.2                         |
| Van Buren, AR    | 263             | (236,310)              | 240             | 0.91              | -23           | (-70,4)              | -137                      | 13              | NA                           |
| Washington, AR   | 1792            | (1707,1897)            | 1943            | 1.08              | 151           | (46,236)             | 62                        | 233             | 154.3                        |
| White, AR        | 881             | (816,955)              | 995             | 1.13              | 114           | (40,179)             | 146                       | 62              | 54.4                         |
| Woodruff, AR     | 106             | (88,134)               | 118             | 1.11              | 12            | (-16,30)             | 191                       | 5               | 41.7                         |
| Yell, AR         | 285             | (249,322)              | 289             | 1.01              | 4             | (-33,40)             | 19                        | 45              | 1125.0                       |
| Alameda, CA      | 10130           | (9885,10384)           | 11237           | 1.11              | 1107          | (853,1352)           | 66                        | 689             | 62.2                         |
| Amador, CA       | 460             | (414,516)              | 512             | 1.11              | 52            | (-4,98)              | 129                       | 37              | 71.2                         |
| Butte, CA        | 2560            | (2409,2644)            | 2343            | 0.92              | -217          | (-301,-66)           | -92                       | 148             | NA                           |
| Calaveras, CA    | 539             | (495,598)              | 555             | 1.03              | 16            | (-43,60)             | 35                        | 22              | 137.5                        |
| Colusa, CA       | 169             | (141,198)              | 175             | 1.04              | 6             | (-23,34)             | 28                        | 17              | 283.3                        |
| Contra Costa, CA | 8078            | (7839,8299)            | 8800            | 1.09              | 722           | (501,961)            | 62                        | 480             | 66.5                         |
| Del Norte, CA    | 321             | (287,366)              | 335             | 1.04              | 14            | (-31,48)             | 50                        | 5               | 35.7                         |
| El Dorado, CA    | 1692            | (1593,1779)            | 1809            | 1.07              | 117           | (30,216)             | 60                        | 78              | 66.7                         |
| Fresno, CA       | 7324            | (7156,7551)            | 8763            | 1.20              | 1439          | (1212,1607)          | 142                       | 1017            | 70.7                         |
| Glenn, CA        | 287             | (249,320)              | 276             | 0.96              | -11           | (-44,27)             | -39                       | 22              | NA                           |
| Humboldt, CA     | 1401            | (1331,1497)            | 1396            | 1.00              | -5            | (-101,65)            | -4                        | 25              | NA                           |
| Imperial, CA     | 1187            | (1110,1265)            | 1892            | 1.59              | 705           | (627,782)            | 385                       | 537             | 76.2                         |
| Inyo, CA         | 226             | (199,261)              | 243             | 1.08              | 17            | (-18,44)             | 94                        | 28              | 164.7                        |
| Kern, CA         | 6531            | (6400,6757)            | 7667            | 1.17              | 1136          | (910,1267)           | 125                       | 761             | 67.0                         |
| Kings, CA        | 926             | (866,1004)             | 1071            | 1.16              | 145           | (67,205)             | 95                        | 129             | 89.0                         |
| Lake, CA         | 905             | (835,965)              | 860             | 0.95              | -45           | (-105,25)            | -69                       | 45              | NA                           |
| Lassen, CA       | 269             | (237,309)              | 289             | 1.07              | 20            | (-20,52)             | 65                        | 17              | 85.0                         |
| Los Angeles, CA  | 65747           | (65206,66773)          | 81703           | 1.24              | 15956         | (14930,16497)        | 158                       | 11573           | 72.5                         |

Table C1: Primary Estimates for Each County

| County              | Expected Deaths | Expected Deaths 95% CI | Observed Deaths | Observed/Expected | Excess Deaths | Excess Deaths 95% CI | Excess Deaths Per 100,000 | COVID-19 Deaths | COVID-19 Excess Ratio (%) |
|---------------------|-----------------|------------------------|-----------------|-------------------|---------------|----------------------|---------------------------|-----------------|---------------------------|
| Madera, CA          | 1168            | (1093,1243)            | 1326            | 1.14              | 158           | (83,233)             | 98                        | 184             | 116.5                     |
| Marin, CA           | 1965            | (1868,2068)            | 2119            | 1.08              | 154           | (51,251)             | 59                        | 132             | 85.7                      |
| Mariposa, CA        | 232             | (200,267)              | 202             | 0.87              | -30           | (-65,2)              | -171                      | 5               | NA                        |
| Mendocino, CA       | 878             | (818,952)              | 1041            | 1.19              | 163           | (89,223)             | 187                       | 38              | 23.3                      |
| Merced, CA          | 1905            | (1811,1995)            | 2278            | 1.20              | 373           | (283,467)            | 133                       | 282             | 75.6                      |
| Modoc, CA           | 115             | (95,141)               | 117             | 1.02              | 2             | (-24,22)             | 23                        | 5               | 250.0                     |
| Mono, CA            | 58              | (42,75)                | 52              | 0.90              | -6            | (-23,10)             | -42                       | 5               | NA                        |
| Monterey, CA        | 2723            | (2605,2830)            | 3026            | 1.11              | 303           | (196,421)            | 69                        | 265             | 87.5                      |
| Napa, CA            | 1233            | (1159,1312)            | 1254            | 1.02              | 21            | (-58,95)             | 15                        | 47              | 223.8                     |
| Nevada, CA          | 1113            | (1042,1189)            | 1174            | 1.05              | 61            | (-15,132)            | 61                        | 70              | 114.8                     |
| Orange, CA          | 20966           | (20697,21431)          | 23626           | 1.13              | 2660          | (2195,2929)          | 83                        | 2647            | 99.5                      |
| Placer, CA          | 3514            | (3358,3628)            | 3583            | 1.02              | 69            | (-45,225)            | 17                        | 187             | 271.0                     |
| Plumas, CA          | 233             | (196,263)              | 268             | 1.15              | 35            | (5,72)               | 185                       | 5               | 14.3                      |
| Riverside, CA       | 18133           | (17851,18530)          | 21744           | 1.20              | 3611          | (3214,3893)          | 143                       | 2849            | 78.9                      |
| Sacramento, CA      | 12328           | (12041,12617)          | 13454           | 1.09              | 1126          | (837,1413)           | 72                        | 1052            | 93.4                      |
| San Benito, CA      | 394             | (355,440)              | 423             | 1.07              | 29            | (-17,68)             | 45                        | 35              | 120.7                     |
| San Bernardino, CA  | 15504           | (15282,15871)          | 19383           | 1.25              | 3879          | (3512,4101)          | 176                       | 2884            | 74.3                      |
| San Diego, CA       | 22309           | (22000,22793)          | 24788           | 1.11              | 2479          | (1995,2788)          | 73                        | 1883            | 76.0                      |
| San Francisco, CA   | 5805            | (5637,5977)            | 6351            | 1.09              | 546           | (374,714)            | 61                        | 263             | 48.2                      |
| San Joaquin, CA     | 5958            | (5774,6131)            | 7038            | 1.18              | 1080          | (907,1264)           | 140                       | 855             | 79.2                      |
| San Luis Obispo, CA | 2516            | (2416,2635)            | 2512            | 1.00              | -4            | (-123,96)            | -1                        | 122             | NA                        |
| San Mateo, CA       | 4722            | (4557,4875)            | 5028            | 1.06              | 306           | (153,471)            | 40                        | 268             | 87.6                      |
| Santa Barbara, CA   | 3308            | (3184,3454)            | 3499            | 1.06              | 191           | (45,315)             | 43                        | 188             | 98.4                      |
| Santa Clara, CA     | 10448           | (10219,10705)          | 11468           | 1.10              | 1020          | (763,1249)           | 52                        | 886             | 86.9                      |
| Santa Cruz, CA      | 1747            | (1663,1854)            | 1889            | 1.08              | 142           | (35,226)             | 52                        | 129             | 90.8                      |
| Shasta, CA          | 2365            | (2253,2462)            | 2451            | 1.04              | 86            | (-11,198)            | 48                        | 112             | 130.2                     |
| Sierra, CA          | 35              | (24,50)                | 39              | 1.11              | 4             | (-11,15)             | 136                       | 0               | 0.0                       |
| Siskiyou, CA        | 611             | (559,666)              | 636             | 1.04              | 25            | (-30,77)             | 57                        | 17              | 68.0                      |
| Solano, CA          | 3674            | (3557,3829)            | 3764            | 1.02              | 90            | (-65,207)            | 20                        | 198             | 220.0                     |
| Sonoma, CA          | 4168            | (4039,4331)            | 4440            | 1.07              | 272           | (109,401)            | 55                        | 221             | 81.2                      |
| Stanislaus, CA      | 4615            | (4459,4780)            | 5353            | 1.16              | 738           | (573,894)            | 132                       | 685             | 92.8                      |
| Sutter, CA          | 896             | (832,970)              | 944             | 1.05              | 48            | (-26,112)            | 49                        | 66              | 137.5                     |
| Tehama, CA          | 784             | (738,864)              | 793             | 1.01              | 9             | (-71,55)             | 14                        | 50              | 555.6                     |
| Trinity, CA         | 159             | (135,189)              | 166             | 1.04              | 7             | (-23,31)             | 58                        | 5               | 71.4                      |
| Tulare, CA          | 3243            | (3111,3360)            | 3928            | 1.21              | 685           | (568,817)            | 145                       | 533             | 77.8                      |
| Tuolumne, CA        | 729             | (667,790)              | 763             | 1.05              | 34            | (-27,96)             | 61                        | 41              | 120.6                     |
| Ventura, CA         | 6053            | (5887,6254)            | 6615            | 1.09              | 562           | (361,728)            | 66                        | 437             | 77.8                      |
| Yolo, CA            | 1381            | (1290,1457)            | 1506            | 1.09              | 125           | (49,216)             | 56                        | 127             | 101.6                     |
| Yuba, CA            | 729             | (662,789)              | 677             | 0.93              | -52           | (-112,15)            | -64                       | 32              | NA                        |
| Adams, CO           | 3130            | (3003,3263)            | 3702            | 1.18              | 572           | (439,699)            | 109                       | 502             | 87.8                      |
| Alamosa, CO         | 157             | (132,188)              | 167             | 1.06              | 10            | (-21,35)             | 59                        | 23              | 230.0                     |
| Arapahoe, CO        | 4113            | (3977,4256)            | 4923            | 1.20              | 810           | (667,946)            | 122                       | 568             | 70.1                      |
| Archuleta, CO       | 121             | (97,147)               | 116             | 0.96              | -5            | (-31,19)             | -34                       | 5               | NA                        |
| Baca, CO            | 50              | (33,63)                | 77              | 1.54              | 27            | (14,44)              | 744                       | 5               | 18.5                      |
| Bent, CO            | 78              | (62,101)               | 78              | 1.00              | 0             | (-23,16)             | 0                         | 12              | Inf                       |
| Boulder, CO         | 2012            | (1926,2134)            | 2166            | 1.08              | 154           | (32,240)             | 47                        | 167             | 108.4                     |
| Broomfield, CO      | 410             | (369,453)              | 530             | 1.29              | 120           | (77,161)             | 168                       | 61              | 50.8                      |
| Chaffee, CO         | 194             | (160,221)              | 210             | 1.08              | 16            | (-11,50)             | 77                        | 18              | 112.5                     |
| Cheyenne, CO        | 18              | (9,27)                 | 25              | 1.39              | 7             | (-2,16)              | 368                       | 5               | 71.4                      |
| Clear Creek, CO     | 70              | (54,92)                | 67              | 0.96              | -3            | (-25,13)             | -31                       | 5               | NA                        |
| Conejos, CO         | 90              | (69,110)               | 92              | 1.02              | 2             | (-18,23)             | 24                        | 5               | 250.0                     |
| Costilla, CO        | 44              | (29,58)                | 41              | 0.93              | -3            | (-17,12)             | -76                       | 5               | NA                        |
| Crowley, CO         | 50              | (35,67)                | 74              | 1.48              | 24            | (7,39)               | 400                       | 12              | 50.0                      |
| Custer, CO          | 51              | (35,65)                | 56              | 1.10              | 5             | (-9,21)              | 98                        | 5               | 100.0                     |
| Delta, CO           | 456             | (420,513)              | 452             | 0.99              | -4            | (-61,32)             | -13                       | 31              | NA                        |
| Denver, CO          | 4633            | (4463,4776)            | 5758            | 1.24              | 1125          | (982,1295)           | 152                       | 734             | 65.2                      |
| Dolores, CO         | 24              | (14,36)                | 23              | 0.96              | -1            | (-13,9)              | -47                       | 0               | 0.0                       |
| Douglas, CO         | 1634            | (1551,1730)            | 1922            | 1.18              | 288           | (192,371)            | 81                        | 193             | 67.0                      |
| Eagle, CO           | 159             | (133,189)              | 159             | 1.00              | 0             | (-30,26)             | 0                         | 14              | Inf                       |
| Elbert, CO          | 166             | (139,198)              | 170             | 1.02              | 4             | (-28,31)             | 15                        | 15              | 375.0                     |
| El Paso, CO         | 5431            | (5312,5649)            | 6176            | 1.14              | 745           | (527,864)            | 101                       | 595             | 79.9                      |
| Fremont, CO         | 606             | (560,662)              | 623             | 1.03              | 17            | (-39,63)             | 35                        | 32              | 188.2                     |
| Garfield, CO        | 395             | (352,440)              | 394             | 1.00              | -1            | (-46,42)             | -2                        | 40              | NA                        |
| Gilpin, CO          | 34              | (23,50)                | 34              | 1.00              | 0             | (-16,11)             | 0                         | 5               | Inf                       |

Table C1: Primary Estimates for Each County

| County                   | Expected Deaths | Expected Deaths 95% CI | Observed Deaths | Observed/Expected | Excess Deaths | Excess Deaths 95% CI | Excess Deaths Per 100,000 | COVID-19 Deaths | COVID-19 Excess Ratio (%) |
|--------------------------|-----------------|------------------------|-----------------|-------------------|---------------|----------------------|---------------------------|-----------------|---------------------------|
| Grand, CO                | 84              | (65,102)               | 81              | 0.96              | -3            | (-21,16)             | -19                       | 5               | NA                        |
| Gunnison, CO             | 81              | (63,103)               | 86              | 1.06              | 5             | (-17,23)             | 28                        | 5               | 100.0                     |
| Huerfano, CO             | 122             | (97,146)               | 143             | 1.17              | 21            | (-3,46)              | 283                       | 11              | 52.4                      |
| Jefferson, CO            | 4704            | (4558,4874)            | 5300            | 1.13              | 596           | (426,742)            | 101                       | 579             | 97.1                      |
| Kiowa, CO                | 22              | (11,31)                | 20              | 0.91              | -2            | (-11,9)              | -141                      | 5               | NA                        |
| Kit Carson, CO           | 72              | (55,92)                | 93              | 1.29              | 21            | (1,38)               | 292                       | 5               | 23.8                      |
| Lake, CO                 | 37              | (24,50)                | 36              | 0.97              | -1            | (-14,12)             | -13                       | 0               | 0.0                       |
| La Plata, CO             | 373             | (330,415)              | 418             | 1.12              | 45            | (3,88)               | 78                        | 30              | 66.7                      |
| Larimer, CO              | 2546            | (2430,2655)            | 2663            | 1.05              | 117           | (8,233)              | 32                        | 139             | 118.8                     |
| Las Animas, CO           | 190             | (162,226)              | 189             | 0.99              | -1            | (-37,27)             | -7                        | 5               | NA                        |
| Lincoln, CO              | 60              | (43,78)                | 62              | 1.03              | 2             | (-16,19)             | 35                        | 5               | 250.0                     |
| Logan, CO                | 220             | (192,257)              | 309             | 1.40              | 89            | (52,117)             | 416                       | 58              | 65.2                      |
| Mesa, CO                 | 1663            | (1588,1778)            | 1801            | 1.08              | 138           | (23,213)             | 88                        | 141             | 102.2                     |
| Moffat, CO               | 109             | (90,136)               | 160             | 1.47              | 51            | (24,70)              | 382                       | 21              | 41.2                      |
| Montezuma, CO            | 273             | (246,316)              | 310             | 1.14              | 37            | (-6,64)              | 141                       | 16              | 43.2                      |
| Montrose, CO             | 459             | (409,506)              | 492             | 1.07              | 33            | (-14,83)             | 77                        | 32              | 97.0                      |
| Morgan, CO               | 283             | (246,321)              | 352             | 1.24              | 69            | (31,106)             | 236                       | 78              | 113.0                     |
| Otero, CO                | 253             | (221,290)              | 309             | 1.22              | 56            | (19,88)              | 303                       | 44              | 78.6                      |
| Ouray, CO                | 31              | (19,43)                | 27              | 0.87              | -4            | (-16,8)              | -82                       | 5               | NA                        |
| Park, CO                 | 118             | (95,142)               | 123             | 1.04              | 5             | (-19,28)             | 25                        | 5               | 100.0                     |
| Phillips, CO             | 51              | (34,64)                | 79              | 1.55              | 28            | (15,45)              | 656                       | 5               | 17.9                      |
| Pitkin, CO               | 64              | (47,82)                | 70              | 1.09              | 6             | (-12,23)             | 33                        | 5               | 83.3                      |
| Prowers, CO              | 137             | (110,161)              | 170             | 1.24              | 33            | (9,60)               | 267                       | 20              | 60.6                      |
| Pueblo, CO               | 1935            | (1857,2059)            | 2328            | 1.20              | 393           | (269,471)            | 231                       | 302             | 76.8                      |
| Rio Blanco, CO           | 53              | (38,68)                | 60              | 1.13              | 7             | (-8,22)              | 112                       | 5               | 71.4                      |
| Rio Grande, CO           | 137             | (114,167)              | 161             | 1.18              | 24            | (-6,47)              | 216                       | 5               | 20.8                      |
| Routt, CO                | 136             | (113,162)              | 133             | 0.98              | -3            | (-29,20)             | -11                       | 21              | NA                        |
| Saguache, CO             | 63              | (44,77)                | 66              | 1.05              | 3             | (-11,22)             | 41                        | 5               | 166.7                     |
| San Miguel, CO           | 22              | (13,33)                | 26              | 1.18              | 4             | (-7,13)              | 47                        | 0               | 0.0                       |
| Sedgwick, CO             | 36              | (21,46)                | 46              | 1.28              | 10            | (0,25)               | 446                       | 5               | 50.0                      |
| Summit, CO               | 77              | (58,95)                | 90              | 1.17              | 13            | (-5,32)              | 42                        | 5               | 38.5                      |
| Teller, CO               | 197             | (166,229)              | 210             | 1.07              | 13            | (-19,44)             | 50                        | 11              | 84.6                      |
| Washington, CO           | 53              | (36,67)                | 82              | 1.55              | 29            | (15,46)              | 597                       | 14              | 48.3                      |
| Weld, CO                 | 2012            | (1903,2100)            | 2233            | 1.11              | 221           | (133,330)            | 66                        | 295             | 133.5                     |
| Yuma, CO                 | 93              | (72,115)               | 116             | 1.25              | 23            | (1,44)               | 229                       | 12              | 52.2                      |
| Fairfield, CT            | 6990            | (6802,7215)            | 8790            | 1.26              | 1800          | (1575,1988)          | 191                       | 1726            | 95.9                      |
| Hartford, CT             | 8324            | (8163,8601)            | 10038           | 1.21              | 1714          | (1437,1875)          | 193                       | 1859            | 108.5                     |
| Litchfield, CT           | 1933            | (1861,2053)            | 2209            | 1.14              | 276           | (156,348)            | 154                       | 261             | 94.6                      |
| Middlesex, CT            | 1668            | (1588,1772)            | 1806            | 1.08              | 138           | (34,218)             | 85                        | 241             | 174.6                     |
| New Haven, CT            | 8107            | (7928,8324)            | 9727            | 1.20              | 1620          | (1403,1799)          | 189                       | 1606            | 99.1                      |
| New London, CT           | 2621            | (2536,2770)            | 2787            | 1.06              | 166           | (17,251)             | 63                        | 300             | 180.7                     |
| Tolland, CT              | 1165            | (1104,1258)            | 1204            | 1.03              | 39            | (-54,100)            | 26                        | 128             | 328.2                     |
| Windham, CT              | 1179            | (1111,1270)            | 1270            | 1.08              | 91            | (0,159)              | 77                        | 93              | 102.2                     |
| Kent, DE                 | 1801            | (1717,1904)            | 2026            | 1.12              | 225           | (122,309)            | 123                       | 197             | 87.6                      |
| New Castle, DE           | 5104            | (4978,5315)            | 5761            | 1.13              | 657           | (446,783)            | 116                       | 511             | 77.8                      |
| Sussex, DE               | 2962            | (2845,3093)            | 3284            | 1.11              | 322           | (191,439)            | 134                       | 330             | 102.5                     |
| District of Columbia, DC | 5035            | (4854,5176)            | 6198            | 1.23              | 1163          | (1022,1344)          | 163                       | 885             | 76.1                      |
| Alachua, FL              | 2115            | (2020,2228)            | 2309            | 1.09              | 194           | (81,289)             | 70                        | 155             | 79.9                      |
| Baker, FL                | 280             | (244,316)              | 301             | 1.07              | 21            | (-15,57)             | 73                        | 38              | 181.0                     |
| Bay, FL                  | 2135            | (2044,2261)            | 2130            | 1.00              | -5            | (-131,86)            | -3                        | 204             | NA                        |
| Bradford, FL             | 356             | (316,397)              | 355             | 1.00              | -1            | (-42,39)             | -4                        | 20              | NA                        |
| Brevard, FL              | 8202            | (8008,8489)            | 8383            | 1.02              | 181           | (-106,375)           | 29                        | 518             | 286.2                     |
| Broward, FL              | 15507           | (15201,15843)          | 17985           | 1.16              | 2478          | (2142,2784)          | 125                       | 1940            | 78.3                      |
| Calhoun, FL              | 209             | (180,242)              | 210             | 1.00              | 1             | (-32,30)             | 7                         | 22              | 2200.0                    |
| Charlotte, FL            | 2887            | (2737,2994)            | 3183            | 1.10              | 296           | (189,446)            | 154                       | 268             | 90.5                      |
| Citrus, FL               | 2872            | (2714,2989)            | 3219            | 1.12              | 347           | (230,505)            | 227                       | 241             | 69.5                      |
| Clay, FL                 | 2013            | (1932,2119)            | 2207            | 1.10              | 194           | (88,275)             | 87                        | 157             | 80.9                      |
| Collier, FL              | 3675            | (3567,3850)            | 4044            | 1.10              | 369           | (194,477)            | 94                        | 363             | 98.4                      |
| Columbia, FL             | 860             | (802,930)              | 968             | 1.13              | 108           | (38,166)             | 151                       | 103             | 95.4                      |
| DeSoto, FL               | 404             | (357,448)              | 450             | 1.11              | 46            | (2,93)               | 120                       | 58              | 126.1                     |
| Dixie, FL                | 246             | (212,277)              | 247             | 1.00              | 1             | (-30,35)             | 6                         | 16              | 1600.0                    |
| Duval, FL                | 9037            | (8874,9366)            | 10131           | 1.12              | 1094          | (765,1257)           | 112                       | 762             | 69.7                      |
| Escambia, FL             | 3696            | (3613,3890)            | 4225            | 1.14              | 529           | (335,612)            | 165                       | 341             | 64.5                      |
| Flagler, FL              | 1509            | (1456,1636)            | 1613            | 1.07              | 104           | (-23,157)            | 89                        | 58              | 55.8                      |

Table C1: Primary Estimates for Each County

| County           | Expected Deaths | Expected Deaths 95% CI | Observed Deaths | Observed/Expected | Excess Deaths | Excess Deaths 95% CI | Excess Deaths Per 100,000 | COVID-19 Deaths | COVID-19 to Excess Ratio (%) |
|------------------|-----------------|------------------------|-----------------|-------------------|---------------|----------------------|---------------------------|-----------------|------------------------------|
| Franklin, FL     | 141             | (119,172)              | 169             | 1.20              | 28            | (-3,50)              | 231                       | 5               | 17.9                         |
| Gadsden, FL      | 497             | (452,548)              | 566             | 1.14              | 69            | (18,114)             | 149                       | 58              | 84.1                         |
| Gilchrist, FL    | 222             | (186,252)              | 229             | 1.03              | 7             | (-23,43)             | 37                        | 15              | 214.3                        |
| Glades, FL       | 138             | (113,168)              | 152             | 1.10              | 14            | (-16,39)             | 100                       | 16              | 114.3                        |
| Gulf, FL         | 211             | (187,252)              | 232             | 1.10              | 21            | (-20,45)             | 128                       | 23              | 109.5                        |
| Hamilton, FL     | 167             | (141,197)              | 202             | 1.21              | 35            | (5,61)               | 244                       | 22              | 62.9                         |
| Hardee, FL       | 243             | (214,284)              | 250             | 1.03              | 7             | (-34,36)             | 26                        | 22              | 314.3                        |
| Hendry, FL       | 354             | (317,398)              | 374             | 1.06              | 20            | (-24,57)             | 47                        | 55              | 275.0                        |
| Hernando, FL     | 3004            | (2874,3141)            | 3175            | 1.06              | 171           | (34,301)             | 86                        | 236             | 138.0                        |
| Highlands, FL    | 1735            | (1677,1876)            | 1869            | 1.08              | 134           | (-7,192)             | 124                       | 195             | 145.5                        |
| Hillsborough, FL | 11308           | (11017,11564)          | 12845           | 1.14              | 1537          | (1281,1828)          | 103                       | 1088            | 70.8                         |
| Holmes, FL       | 298             | (271,347)              | 326             | 1.09              | 28            | (-21,55)             | 142                       | 29              | 103.6                        |
| Indian River, FL | 2256            | (2158,2383)            | 2387            | 1.06              | 131           | (4,229)              | 80                        | 152             | 116.0                        |
| Jackson, FL      | 696             | (644,761)              | 783             | 1.12              | 87            | (22,139)             | 180                       | 110             | 126.4                        |
| Jefferson, FL    | 177             | (150,209)              | 222             | 1.25              | 45            | (13,72)              | 310                       | 14              | 31.1                         |
| Lafayette, FL    | 90              | (72,114)               | 110             | 1.22              | 20            | (-4,38)              | 226                       | 19              | 95.0                         |
| Lake, FL         | 4903            | (4758,5085)            | 5147            | 1.05              | 244           | (62,389)             | 64                        | 321             | 131.6                        |
| Lee, FL          | 7806            | (7586,8034)            | 8620            | 1.10              | 814           | (586,1034)           | 104                       | 680             | 83.5                         |
| Leon, FL         | 2051            | (1972,2185)            | 2438            | 1.19              | 387           | (253,466)            | 131                       | 171             | 44.2                         |
| Levy, FL         | 590             | (527,641)              | 643             | 1.09              | 53            | (2,116)              | 127                       | 33              | 62.3                         |
| Liberty, FL      | 82              | (63,102)               | 96              | 1.17              | 14            | (-6,33)              | 162                       | 16              | 114.3                        |
| Madison, FL      | 243             | (211,281)              | 312             | 1.28              | 69            | (31,101)             | 370                       | 41              | 59.4                         |
| Manatee, FL      | 4446            | (4292,4638)            | 4834            | 1.09              | 388           | (196,542)            | 94                        | 450             | 116.0                        |
| Marion, FL       | 5631            | (5487,5860)            | 6145            | 1.09              | 514           | (285,658)            | 138                       | 489             | 95.1                         |
| Martin, FL       | 2050            | (1953,2168)            | 2338            | 1.14              | 288           | (170,385)            | 177                       | 184             | 63.9                         |
| Miami-Dade, FL   | 21248           | (20865,21672)          | 25621           | 1.21              | 4373          | (3949,4756)          | 157                       | 4092            | 93.6                         |
| Monroe, FL       | 716             | (647,761)              | 770             | 1.08              | 54            | (9,123)              | 75                        | 42              | 77.8                         |
| Nassau, FL       | 1068            | (994,1135)             | 1079            | 1.01              | 11            | (-56,85)             | 12                        | 71              | 645.5                        |
| Okaloosa, FL     | 2021            | (1912,2113)            | 2231            | 1.10              | 210           | (118,319)            | 98                        | 221             | 105.2                        |
| Okeechobee, FL   | 516             | (473,574)              | 556             | 1.08              | 40            | (-18,83)             | 95                        | 58              | 145.0                        |
| Orange, FL       | 8857            | (8647,9089)            | 9855            | 1.11              | 998           | (766,1208)           | 70                        | 818             | 82.0                         |
| Osceola, FL      | 2707            | (2609,2842)            | 3004            | 1.11              | 297           | (162,395)            | 75                        | 298             | 100.3                        |
| Palm Beach, FL   | 15321           | (14937,15628)          | 17273           | 1.13              | 1952          | (1645,2336)          | 129                       | 1806            | 92.5                         |
| Pasco, FL        | 6791            | (6569,6996)            | 7259            | 1.07              | 468           | (263,690)            | 82                        | 420             | 89.7                         |
| Pinellas, FL     | 12411           | (12110,12777)          | 13290           | 1.07              | 879           | (513,1180)           | 89                        | 935             | 106.4                        |
| Polk, FL         | 7818            | (7589,8018)            | 8595            | 1.10              | 777           | (577,1006)           | 103                       | 760             | 97.8                         |
| Putnam, FL       | 1100            | (1025,1178)            | 1168            | 1.06              | 68            | (-10,143)            | 90                        | 78              | 114.7                        |
| St. Johns, FL    | 2311            | (2190,2397)            | 2362            | 1.02              | 51            | (-35,172)            | 18                        | 111             | 217.6                        |
| St. Lucie, FL    | 3635            | (3502,3787)            | 3982            | 1.10              | 347           | (195,480)            | 103                       | 381             | 109.8                        |
| Santa Rosa, FL   | 1785            | (1713,1911)            | 1866            | 1.05              | 81            | (-45,153)            | 43                        | 134             | 165.4                        |
| Sarasota, FL     | 6154            | (5970,6362)            | 6800            | 1.10              | 646           | (438,830)            | 147                       | 447             | 69.2                         |
| Seminole, FL     | 3815            | (3673,3971)            | 4012            | 1.05              | 197           | (41,339)             | 41                        | 284             | 144.2                        |
| Sumter, FL       | 2281            | (2199,2438)            | 2407            | 1.06              | 126           | (-31,208)            | 92                        | 129             | 102.4                        |
| Suwannee, FL     | 615             | (558,674)              | 681             | 1.11              | 66            | (7,123)              | 145                       | 74              | 112.1                        |
| Taylor, FL       | 288             | (254,329)              | 340             | 1.18              | 52            | (11,86)              | 240                       | 33              | 63.5                         |
| Union, FL        | 270             | (235,306)              | 306             | 1.13              | 36            | (0,71)               | 241                       | 66              | 183.3                        |
| Volusia, FL      | 7900            | (7681,8141)            | 8245            | 1.04              | 345           | (104,564)            | 61                        | 446             | 129.3                        |
| Wakulla, FL      | 318             | (284,361)              | 389             | 1.22              | 71            | (28,105)             | 209                       | 30              | 42.3                         |
| Walton, FL       | 776             | (714,839)              | 807             | 1.04              | 31            | (-32,93)             | 40                        | 53              | 171.0                        |
| Washington, FL   | 388             | (357,446)              | 350             | 0.90              | -38           | (-96,-7)             | -149                      | 33              | NA                           |
| Appling, GA      | 230             | (197,264)              | 263             | 1.14              | 33            | (-1,66)              | 177                       | 49              | 148.5                        |
| Atkinson, GA     | 91              | (74,117)               | 93              | 1.02              | 2             | (-24,19)             | 24                        | 11              | 550.0                        |
| Bacon, GA        | 143             | (116,168)              | 164             | 1.15              | 21            | (-4,48)              | 189                       | 26              | 123.8                        |
| Baker, GA        | 38              | (25,51)                | 43              | 1.13              | 5             | (-8,18)              | 171                       | 5               | 100.0                        |
| Baldwin, GA      | 521             | (476,582)              | 569             | 1.09              | 48            | (-13,93)             | 108                       | 52              | 108.3                        |
| Banks, GA        | 209             | (177,241)              | 202             | 0.97              | -7            | (-39,25)             | -36                       | 21              | NA                           |
| Barrow, GA       | 708             | (650,774)              | 739             | 1.04              | 31            | (-35,89)             | 36                        | 68              | 219.4                        |
| Bartow, GA       | 1010            | (956,1095)             | 1202            | 1.19              | 192           | (107,246)            | 176                       | 121             | 63.0                         |
| Ben Hill, GA     | 235             | (204,274)              | 297             | 1.26              | 62            | (23,93)              | 380                       | 50              | 80.6                         |
| Berrien, GA      | 255             | (224,296)              | 274             | 1.07              | 19            | (-22,50)             | 97                        | 32              | 168.4                        |
| Bibb, GA         | 1766            | (1679,1871)            | 2148            | 1.22              | 382           | (277,469)            | 249                       | 208             | 54.5                         |
| Bleckley, GA     | 142             | (113,162)              | 192             | 1.35              | 50            | (30,79)              | 386                       | 32              | 64.0                         |
| Brantley, GA     | 218             | (190,255)              | 248             | 1.14              | 30            | (-7,58)              | 157                       | 32              | 106.7                        |
| Brooks, GA       | 225             | (199,266)              | 237             | 1.05              | 12            | (-29,38)             | 79                        | 31              | 258.3                        |

Table C1: Primary Estimates for Each County

| County            | Expected Deaths | Expected Deaths 95% CI | Observed Deaths | Observed/Expected | Excess Deaths | Excess Deaths 95% CI | Excess Deaths Per 100,000 | COVID-19 Deaths | COVID-19 Excess Ratio (%) |
|-------------------|-----------------|------------------------|-----------------|-------------------|---------------|----------------------|---------------------------|-----------------|---------------------------|
| Bryan, GA         | 308             | (267,341)              | 357             | 1.16              | 49            | (16,90)              | 121                       | 21              | 42.9                      |
| Bulloch, GA       | 577             | (526,629)              | 647             | 1.12              | 70            | (18,121)             | 88                        | 57              | 81.4                      |
| Burke, GA         | 245             | (209,277)              | 293             | 1.20              | 48            | (16,84)              | 216                       | 28              | 58.3                      |
| Butts, GA         | 296             | (262,338)              | 344             | 1.16              | 48            | (6,82)               | 196                       | 43              | 89.6                      |
| Calhoun, GA       | 64              | (45,81)                | 84              | 1.31              | 20            | (3,39)               | 320                       | 10              | 50.0                      |
| Camden, GA        | 413             | (376,462)              | 430             | 1.04              | 17            | (-32,54)             | 31                        | 23              | 135.3                     |
| Candler, GA       | 152             | (118,170)              | 197             | 1.30              | 45            | (27,79)              | 408                       | 35              | 77.8                      |
| Carroll, GA       | 1180            | (1101,1257)            | 1346            | 1.14              | 166           | (89,245)             | 138                       | 128             | 77.1                      |
| Catoosa, GA       | 747             | (681,803)              | 773             | 1.03              | 26            | (-30,92)             | 38                        | 63              | 242.3                     |
| Charlton, GA      | 125             | (103,153)              | 161             | 1.29              | 36            | (8,58)               | 269                       | 19              | 52.8                      |
| Chatham, GA       | 2536            | (2448,2674)            | 2884            | 1.14              | 348           | (210,436)            | 121                       | 212             | 60.9                      |
| Chattahoochee, GA | 46              | (32,62)                | 44              | 0.96              | -2            | (-18,12)             | -17                       | 5               | NA                        |
| Chattooga, GA     | 360             | (320,403)              | 389             | 1.08              | 29            | (-14,69)             | 116                       | 39              | 134.5                     |
| Cherokee, GA      | 1802            | (1719,1905)            | 1927            | 1.07              | 125           | (22,208)             | 47                        | 132             | 105.6                     |
| Clarke, GA        | 797             | (734,861)              | 841             | 1.06              | 44            | (-20,107)            | 34                        | 53              | 120.5                     |
| Clay, GA          | 43              | (36,66)                | 45              | 1.05              | 2             | (-21,9)              | 73                        | 5               | 250.0                     |
| Clayton, GA       | 1946            | (1853,2056)            | 2207            | 1.13              | 261           | (151,354)            | 87                        | 213             | 81.6                      |
| Clinch, GA        | 91              | (73,115)               | 120             | 1.32              | 29            | (5,47)               | 439                       | 15              | 51.7                      |
| Cobb, GA          | 4704            | (4573,4883)            | 5362            | 1.14              | 658           | (479,789)            | 86                        | 503             | 76.4                      |
| Coffee, GA        | 449             | (407,495)              | 561             | 1.25              | 112           | (66,154)             | 259                       | 101             | 90.2                      |
| Colquitt, GA      | 506             | (458,556)              | 641             | 1.27              | 135           | (85,183)             | 297                       | 57              | 42.2                      |
| Columbia, GA      | 1038            | (982,1123)             | 1211            | 1.17              | 173           | (88,229)             | 108                       | 110             | 63.6                      |
| Cook, GA          | 204             | (167,230)              | 244             | 1.20              | 40            | (14,77)              | 235                       | 34              | 85.0                      |
| Coweta, GA        | 1173            | (1101,1253)            | 1318            | 1.12              | 145           | (65,217)             | 96                        | 112             | 77.2                      |
| Crawford, GA      | 151             | (134,187)              | 166             | 1.10              | 15            | (-21,32)             | 121                       | 5               | 33.3                      |
| Crisp, GA         | 265             | (240,312)              | 375             | 1.42              | 110           | (63,135)             | 492                       | 47              | 42.7                      |
| Dade, GA          | 199             | (165,231)              | 239             | 1.20              | 40            | (8,74)               | 249                       | 5               | 12.5                      |
| Dawson, GA        | 288             | (251,323)              | 271             | 0.94              | -17           | (-52,20)             | -64                       | 19              | NA                        |
| Decatur, GA       | 338             | (302,386)              | 431             | 1.28              | 93            | (45,129)             | 353                       | 46              | 49.5                      |
| DeKalb, GA        | 4787            | (4663,4970)            | 5601            | 1.17              | 814           | (631,938)            | 106                       | 522             | 64.1                      |
| Dodge, GA         | 220             | (194,258)              | 326             | 1.48              | 106           | (68,132)             | 523                       | 71              | 67.0                      |
| Dooly, GA         | 124             | (100,149)              | 187             | 1.51              | 63            | (38,87)              | 467                       | 20              | 31.7                      |
| Dougherty, GA     | 1010            | (950,1096)             | 1253            | 1.24              | 243           | (157,303)            | 274                       | 199             | 81.9                      |
| Douglas, GA       | 1063            | (996,1134)             | 1238            | 1.16              | 175           | (104,242)            | 118                       | 113             | 64.6                      |
| Early, GA         | 145             | (121,180)              | 190             | 1.31              | 45            | (10,69)              | 445                       | 36              | 80.0                      |
| Echols, GA        | 23              | (14,35)                | 41              | 1.78              | 18            | (6,27)               | 436                       | 5               | 27.8                      |
| Effingham, GA     | 544             | (501,599)              | 541             | 0.99              | -3            | (-58,40)             | -5                        | 32              | NA                        |
| Elbert, GA        | 271             | (235,310)              | 357             | 1.32              | 86            | (47,122)             | 450                       | 30              | 34.9                      |
| Emanuel, GA       | 320             | (291,370)              | 352             | 1.10              | 32            | (-18,61)             | 142                       | 51              | 159.4                     |
| Evans, GA         | 121             | (94,142)               | 147             | 1.21              | 26            | (5,53)               | 244                       | 12              | 46.2                      |
| Fannin, GA        | 381             | (342,430)              | 422             | 1.11              | 41            | (-8,80)              | 150                       | 30              | 73.2                      |
| Fayette, GA       | 961             | (893,1028)             | 1049            | 1.09              | 88            | (21,156)             | 76                        | 74              | 84.1                      |
| Floyd, GA         | 1200            | (1135,1287)            | 1347            | 1.12              | 147           | (60,212)             | 148                       | 120             | 81.6                      |
| Forsyth, GA       | 1337            | (1249,1408)            | 1415            | 1.06              | 78            | (7,166)              | 31                        | 81              | 103.8                     |
| Franklin, GA      | 330             | (288,372)              | 381             | 1.15              | 51            | (9,93)               | 218                       | 35              | 68.6                      |
| Fulton, GA        | 6999            | (6814,7204)            | 8201            | 1.17              | 1202          | (997,1387)           | 112                       | 753             | 62.6                      |
| Gilmer, GA        | 431             | (394,486)              | 422             | 0.98              | -9            | (-64,28)             | -28                       | 35              | NA                        |
| Glascocock, GA    | 39              | (27,55)                | 42              | 1.08              | 3             | (-13,15)             | 104                       | 11              | 366.7                     |
| Glynn, GA         | 943             | (880,1009)             | 1112            | 1.18              | 169           | (103,232)            | 197                       | 118             | 69.8                      |
| Gordon, GA        | 615             | (575,680)              | 690             | 1.12              | 75            | (10,115)             | 127                       | 65              | 86.7                      |
| Grady, GA         | 283             | (251,329)              | 315             | 1.11              | 32            | (-14,64)             | 130                       | 40              | 125.0                     |
| Greene, GA        | 229             | (198,265)              | 251             | 1.10              | 22            | (-14,53)             | 118                       | 27              | 122.7                     |
| Gwinnett, GA      | 4721            | (4562,4870)            | 5557            | 1.18              | 836           | (687,995)            | 88                        | 586             | 70.1                      |
| Habersham, GA     | 507             | (460,560)              | 596             | 1.18              | 89            | (36,136)             | 191                       | 79              | 88.8                      |
| Hall, GA          | 1698            | (1606,1791)            | 2004            | 1.18              | 306           | (213,398)            | 147                       | 220             | 71.9                      |
| Hancock, GA       | 119             | (95,144)               | 186             | 1.56              | 67            | (42,91)              | 819                       | 41              | 61.2                      |
| Haralson, GA      | 381             | (330,411)              | 466             | 1.22              | 85            | (55,136)             | 282                       | 52              | 61.2                      |
| Harris, GA        | 331             | (297,378)              | 331             | 1.00              | 0             | (-47,34)             | 0                         | 31              | Inf                       |
| Hart, GA          | 325             | (279,358)              | 367             | 1.13              | 42            | (9,88)               | 157                       | 39              | 92.9                      |
| Hardy, GA         | 150             | (123,174)              | 154             | 1.03              | 4             | (-20,31)             | 33                        | 5               | 125.0                     |
| Henry, GA         | 1748            | (1658,1841)            | 2036            | 1.16              | 288           | (195,378)            | 120                       | 158             | 54.9                      |
| Houston, GA       | 1344            | (1277,1435)            | 1532            | 1.14              | 188           | (97,255)             | 117                       | 118             | 62.8                      |
| Irwin, GA         | 134             | (110,159)              | 145             | 1.08              | 11            | (-14,35)             | 115                       | 19              | 172.7                     |
| Jackson, GA       | 680             | (615,727)              | 787             | 1.16              | 107           | (60,172)             | 140                       | 82              | 76.6                      |

Table C1: Primary Estimates for Each County

| County         | Expected Deaths | Expected Deaths 95% CI | Observed Deaths | Observed/Expected | Excess Deaths | Excess Deaths 95% CI | Excess Deaths Per 100,000 | COVID-19 Deaths | COVID-19 Excess Ratio (%) |
|----------------|-----------------|------------------------|-----------------|-------------------|---------------|----------------------|---------------------------|-----------------|---------------------------|
| Jasper, GA     | 162             | (136,189)              | 178             | 1.10              | 16            | (-11,42)             | 112                       | 17              | 106.2                     |
| Jeff Davis, GA | 175             | (144,205)              | 220             | 1.26              | 45            | (15,76)              | 299                       | 30              | 66.7                      |
| Jefferson, GA  | 229             | (194,264)              | 295             | 1.29              | 66            | (31,101)             | 438                       | 41              | 62.1                      |
| Jenkins, GA    | 98              | (77,121)               | 122             | 1.24              | 24            | (1,45)               | 281                       | 26              | 108.3                     |
| Johnson, GA    | 115             | (99,148)               | 144             | 1.25              | 29            | (-4,45)              | 298                       | 29              | 100.0                     |
| Jones, GA      | 283             | (248,327)              | 310             | 1.10              | 27            | (-17,62)             | 93                        | 21              | 77.8                      |
| Lamar, GA      | 231             | (194,262)              | 267             | 1.16              | 36            | (5,73)               | 186                       | 33              | 91.7                      |
| Lanier, GA     | 103             | (83,126)               | 102             | 0.99              | -1            | (-24,19)             | -10                       | 12              | NA                        |
| Laurens, GA    | 594             | (557,662)              | 722             | 1.22              | 128           | (60,165)             | 270                       | 107             | 83.6                      |
| Lee, GA        | 261             | (235,301)              | 315             | 1.21              | 54            | (14,80)              | 178                       | 35              | 64.8                      |
| Liberty, GA    | 427             | (383,471)              | 461             | 1.08              | 34            | (-10,78)             | 56                        | 37              | 108.8                     |
| Lincoln, GA    | 100             | (79,121)               | 116             | 1.16              | 16            | (-5,37)              | 199                       | 18              | 112.5                     |
| Long, GA       | 96              | (74,114)               | 121             | 1.26              | 25            | (7,47)               | 128                       | 5               | 20.0                      |
| Lowndes, GA    | 1005            | (947,1088)             | 1159            | 1.15              | 154           | (71,212)             | 130                       | 111             | 72.1                      |
| Lumpkin, GA    | 328             | (290,368)              | 332             | 1.01              | 4             | (-36,42)             | 12                        | 22              | 550.0                     |
| McDuffie, GA   | 272             | (243,313)              | 288             | 1.06              | 16            | (-25,45)             | 74                        | 24              | 150.0                     |
| McIntosh, GA   | 157             | (128,183)              | 179             | 1.14              | 22            | (-4,51)              | 148                       | 14              | 63.6                      |
| Macon, GA      | 168             | (144,203)              | 171             | 1.02              | 3             | (-32,27)             | 23                        | 11              | 366.7                     |
| Madison, GA    | 318             | (282,364)              | 340             | 1.07              | 22            | (-24,58)             | 72                        | 27              | 122.7                     |
| Marion, GA     | 93              | (75,118)               | 114             | 1.23              | 21            | (-4,39)              | 256                       | 5               | 23.8                      |
| Meriwether, GA | 297             | (263,337)              | 337             | 1.13              | 40            | (0,74)               | 189                       | 21              | 52.5                      |
| Miller, GA     | 93              | (71,114)               | 103             | 1.11              | 10            | (-11,32)             | 184                       | 5               | 50.0                      |
| Mitchell, GA   | 298             | (264,341)              | 334             | 1.12              | 36            | (-7,70)              | 163                       | 54              | 150.0                     |
| Monroe, GA     | 326             | (287,363)              | 369             | 1.13              | 43            | (6,82)               | 153                       | 49              | 114.0                     |
| Montgomery, GA | 102             | (82,128)               | 115             | 1.13              | 13            | (-13,33)             | 140                       | 17              | 130.8                     |
| Morgan, GA     | 207             | (174,234)              | 250             | 1.21              | 43            | (16,76)              | 217                       | 13              | 30.2                      |
| Murray, GA     | 397             | (363,449)              | 472             | 1.19              | 75            | (23,109)             | 187                       | 43              | 57.3                      |
| Muscogee, GA   | 2123            | (2050,2259)            | 2356            | 1.11              | 233           | (97,306)             | 119                       | 218             | 93.6                      |
| Newton, GA     | 958             | (901,1045)             | 1172            | 1.22              | 214           | (127,271)            | 190                       | 117             | 54.7                      |
| Oconee, GA     | 309             | (276,351)              | 345             | 1.12              | 36            | (-6,69)              | 86                        | 31              | 86.1                      |
| Oglethorpe, GA | 169             | (140,198)              | 187             | 1.11              | 18            | (-11,47)             | 117                       | 5               | 27.8                      |
| Paulding, GA   | 1099            | (1034,1176)            | 1215            | 1.11              | 116           | (39,181)             | 67                        | 112             | 96.6                      |
| Peach, GA      | 339             | (301,382)              | 373             | 1.10              | 34            | (-9,72)              | 123                       | 36              | 105.9                     |
| Pickens, GA    | 367             | (331,417)              | 409             | 1.11              | 42            | (-8,78)              | 128                       | 25              | 59.5                      |
| Pierce, GA     | 234             | (207,278)              | 298             | 1.27              | 64            | (20,91)              | 324                       | 38              | 59.4                      |
| Pike, GA       | 216             | (188,252)              | 215             | 1.00              | -1            | (-37,27)             | -5                        | 33              | NA                        |
| Polk, GA       | 522             | (477,580)              | 580             | 1.11              | 58            | (0,103)              | 133                       | 51              | 87.9                      |
| Pulaski, GA    | 119             | (97,145)               | 133             | 1.12              | 14            | (-12,36)             | 129                       | 23              | 164.3                     |
| Putnam, GA     | 254             | (215,285)              | 296             | 1.17              | 42            | (11,81)              | 191                       | 31              | 73.8                      |
| Quitman, GA    | 36              | (30,57)                | 41              | 1.14              | 5             | (-16,11)             | 232                       | 5               | 100.0                     |
| Rabun, GA      | 230             | (198,265)              | 296             | 1.29              | 66            | (31,98)              | 381                       | 26              | 39.4                      |
| Randolph, GA   | 94              | (77,118)               | 123             | 1.31              | 29            | (5,46)               | 437                       | 25              | 86.2                      |
| Richmond, GA   | 2132            | (2029,2239)            | 2525            | 1.18              | 393           | (286,496)            | 195                       | 259             | 65.9                      |
| Rockdale, GA   | 825             | (776,906)              | 898             | 1.09              | 73            | (-8,122)             | 79                        | 76              | 104.1                     |
| Schley, GA     | 40              | (27,55)                | 50              | 1.25              | 10            | (-5,23)              | 192                       | 5               | 50.0                      |
| Screven, GA    | 168             | (138,196)              | 210             | 1.25              | 42            | (14,72)              | 302                       | 18              | 42.9                      |
| Seminole, GA   | 146             | (122,177)              | 148             | 1.01              | 2             | (-29,26)             | 24                        | 15              | 750.0                     |
| Spalding, GA   | 834             | (771,899)              | 970             | 1.16              | 136           | (71,199)             | 202                       | 95              | 69.9                      |
| Stephens, GA   | 389             | (351,440)              | 409             | 1.05              | 20            | (-31,58)             | 77                        | 43              | 215.0                     |
| Stewart, GA    | 66              | (49,83)                | 71              | 1.08              | 5             | (-12,22)             | 80                        | 13              | 260.0                     |
| Sumter, GA     | 402             | (356,447)              | 409             | 1.02              | 7             | (-38,53)             | 24                        | 73              | 1042.9                    |
| Talbot, GA     | 96              | (76,121)               | 97              | 1.01              | 1             | (-24,21)             | 16                        | 5               | 500.0                     |
| Taliaferro, GA | 25              | (16,38)                | 28              | 1.12              | 3             | (-10,12)             | 190                       | 0               | 0.0                       |
| Tattnall, GA   | 265             | (230,299)              | 282             | 1.06              | 17            | (-17,52)             | 68                        | 35              | 205.9                     |
| Taylor, GA     | 107             | (88,133)               | 121             | 1.13              | 14            | (-12,33)             | 178                       | 20              | 142.9                     |
| Telfair, GA    | 155             | (133,183)              | 222             | 1.43              | 67            | (39,89)              | 418                       | 35              | 52.2                      |
| Terrell, GA    | 123             | (101,152)              | 156             | 1.27              | 33            | (4,55)               | 393                       | 31              | 93.9                      |
| Thomas, GA     | 552             | (515,617)              | 625             | 1.13              | 73            | (8,110)              | 166                       | 79              | 108.2                     |
| Tift, GA       | 478             | (441,542)              | 531             | 1.11              | 53            | (-11,90)             | 130                       | 78              | 147.2                     |
| Toombs, GA     | 320             | (279,358)              | 422             | 1.32              | 102           | (64,143)             | 378                       | 56              | 54.9                      |
| Towns, GA      | 202             | (172,231)              | 215             | 1.06              | 13            | (-16,43)             | 106                       | 27              | 207.7                     |
| Treutlen, GA   | 83              | (64,105)               | 104             | 1.25              | 21            | (-1,40)              | 308                       | 15              | 71.4                      |
| Troup, GA      | 739             | (677,801)              | 919             | 1.24              | 180           | (118,242)            | 259                       | 112             | 62.2                      |
| Turner, GA     | 140             | (119,172)              | 125             | 0.89              | -15           | (-47,6)              | -190                      | 26              | NA                        |

Table C1: Primary Estimates for Each County

| County         | Expected Deaths | Expected Deaths 95% CI | Observed Deaths | Observed/Expected | Excess Deaths | Excess Deaths 95% CI | Excess Deaths Per 100,000 | COVID-19 Deaths | COVID-19 Excess Ratio (%) |
|----------------|-----------------|------------------------|-----------------|-------------------|---------------|----------------------|---------------------------|-----------------|---------------------------|
| Twiggs, GA     | 127             | (100,148)              | 148             | 1.17              | 21            | (0,48)               | 261                       | 22              | 104.8                     |
| Union, GA      | 346             | (294,376)              | 424             | 1.23              | 78            | (48,130)             | 310                       | 35              | 44.9                      |
| Upson, GA      | 420             | (383,477)              | 491             | 1.17              | 71            | (14,108)             | 271                       | 63              | 88.7                      |
| Walker, GA     | 902             | (835,968)              | 974             | 1.08              | 72            | (6,139)              | 103                       | 64              | 88.9                      |
| Walton, GA     | 964             | (889,1026)             | 1071            | 1.11              | 107           | (45,182)             | 110                       | 103             | 96.3                      |
| Ware, GA       | 495             | (453,551)              | 598             | 1.21              | 103           | (47,145)             | 289                       | 80              | 77.7                      |
| Warren, GA     | 85              | (61,102)               | 101             | 1.19              | 16            | (-1,40)              | 309                       | 5               | 31.2                      |
| Washington, GA | 249             | (218,291)              | 326             | 1.31              | 77            | (35,108)             | 381                       | 57              | 74.0                      |
| Wayne, GA      | 394             | (354,443)              | 390             | 0.99              | -4            | (-53,36)             | -13                       | 46              | NA                        |
| Webster, GA    | 34              | (23,52)                | 32              | 0.94              | -2            | (-20,9)              | -76                       | 5               | NA                        |
| Wheeler, GA    | 63              | (46,81)                | 77              | 1.22              | 14            | (-4,31)              | 179                       | 15              | 107.1                     |
| White, GA      | 328             | (290,372)              | 389             | 1.19              | 61            | (17,99)              | 197                       | 40              | 65.6                      |
| Whitfield, GA  | 903             | (845,976)              | 1075            | 1.19              | 172           | (99,230)             | 165                       | 150             | 87.2                      |
| Wilcox, GA     | 99              | (81,125)               | 136             | 1.37              | 37            | (11,55)              | 419                       | 25              | 67.6                      |
| Wilkes, GA     | 147             | (123,175)              | 159             | 1.08              | 12            | (-16,36)             | 123                       | 12              | 100.0                     |
| Wilkinson, GA  | 131             | (105,154)              | 149             | 1.14              | 18            | (-5,44)              | 199                       | 16              | 88.9                      |
| Worth, GA      | 263             | (243,312)              | 269             | 1.02              | 6             | (-43,26)             | 30                        | 44              | 733.3                     |
| Hawaii, HI     | 1924            | (1832,2020)            | 1864            | 0.97              | -60           | (-156,32)            | -29                       | 54              | NA                        |
| Honolulu, HI   | 7977            | (7831,8246)            | 8335            | 1.04              | 358           | (89,504)             | 37                        | 300             | 83.8                      |
| Kauai, HI      | 609             | (560,669)              | 588             | 0.97              | -21           | (-81,28)             | -29                       | 5               | NA                        |
| Maui, HI       | 1226            | (1160,1310)            | 1245            | 1.02              | 19            | (-65,85)             | 11                        | 21              | 110.5                     |
| Ada, ID        | 3493            | (3368,3645)            | 3819            | 1.09              | 326           | (174,451)            | 66                        | 364             | 111.7                     |
| Adams, ID      | 52              | (37,69)                | 45              | 0.87              | -7            | (-24,8)              | -156                      | 5               | NA                        |
| Bannock, ID    | 814             | (757,879)              | 853             | 1.05              | 39            | (-26,96)             | 43                        | 71              | 182.1                     |
| Bear Lake, ID  | 62              | (46,83)                | 77              | 1.24              | 15            | (-6,31)              | 247                       | 5               | 33.3                      |
| Benewah, ID    | 137             | (109,161)              | 121             | 0.88              | -16           | (-40,12)             | -171                      | 5               | NA                        |
| Bingham, ID    | 435             | (389,481)              | 471             | 1.08              | 36            | (-10,82)             | 77                        | 44              | 122.2                     |
| Blaine, ID     | 126             | (104,152)              | 140             | 1.11              | 14            | (-12,36)             | 60                        | 15              | 107.1                     |
| Boise, ID      | 63              | (48,84)                | 73              | 1.16              | 10            | (-11,25)             | 122                       | 5               | 50.0                      |
| Bonner, ID     | 496             | (449,546)              | 478             | 0.96              | -18           | (-68,29)             | -38                       | 21              | NA                        |
| Bonneville, ID | 1003            | (939,1080)             | 1102            | 1.10              | 99            | (22,163)             | 82                        | 121             | 122.2                     |
| Boundary, ID   | 115             | (91,139)               | 137             | 1.19              | 22            | (-2,46)              | 183                       | 10              | 45.5                      |
| Butte, ID      | 35              | (23,51)                | 36              | 1.03              | 1             | (-15,13)             | 38                        | 5               | 500.0                     |
| Canyon, ID     | 1752            | (1658,1849)            | 1921            | 1.10              | 169           | (72,263)             | 71                        | 228             | 134.9                     |
| Caribou, ID    | 66              | (50,86)                | 88              | 1.33              | 22            | (2,38)               | 309                       | 5               | 22.7                      |
| Cassia, ID     | 216             | (185,249)              | 228             | 1.06              | 12            | (-21,43)             | 50                        | 19              | 158.3                     |
| Clearwater, ID | 107             | (82,128)               | 124             | 1.16              | 17            | (-4,42)              | 190                       | 5               | 29.4                      |
| Custer, ID     | 58              | (41,75)                | 52              | 0.90              | -6            | (-23,11)             | -132                      | 5               | NA                        |
| Elmore, ID     | 232             | (200,268)              | 232             | 1.00              | 0             | (-36,32)             | 0                         | 15              | Inf                       |
| Franklin, ID   | 119             | (97,145)               | 104             | 0.87              | -15           | (-41,7)              | -106                      | 5               | NA                        |
| Fremont, ID    | 109             | (83,131)               | 126             | 1.16              | 17            | (-5,43)              | 128                       | 14              | 82.4                      |
| Gem, ID        | 240             | (205,271)              | 264             | 1.10              | 24            | (-7,59)              | 132                       | 20              | 83.3                      |
| Gooding, ID    | 137             | (114,165)              | 200             | 1.46              | 63            | (35,86)              | 413                       | 22              | 34.9                      |
| Idaho, ID      | 209             | (179,243)              | 209             | 1.00              | 0             | (-34,30)             | 0                         | 17              | Inf                       |
| Jefferson, ID  | 197             | (162,226)              | 199             | 1.01              | 2             | (-27,37)             | 6                         | 16              | 800.0                     |
| Jerome, ID     | 178             | (149,210)              | 187             | 1.05              | 9             | (-23,38)             | 37                        | 18              | 200.0                     |
| Kootenai, ID   | 1667            | (1596,1777)            | 1662            | 1.00              | -5            | (-115,66)            | -3                        | 128             | NA                        |
| Latah, ID      | 213             | (182,244)              | 250             | 1.17              | 37            | (6,68)               | 90                        | 5               | 13.5                      |
| Lemhi, ID      | 123             | (99,146)               | 132             | 1.07              | 9             | (-14,33)             | 110                       | 11              | 122.2                     |
| Lewis, ID      | 53              | (41,74)                | 52              | 0.98              | -1            | (-22,11)             | -26                       | 5               | NA                        |
| Lincoln, ID    | 41              | (28,56)                | 53              | 1.29              | 12            | (-3,25)              | 222                       | 5               | 41.7                      |
| Madison, ID    | 158             | (133,190)              | 193             | 1.22              | 35            | (3,60)               | 89                        | 16              | 45.7                      |
| Minidoka, ID   | 196             | (171,236)              | 208             | 1.06              | 12            | (-28,37)             | 57                        | 26              | 216.7                     |
| Nez Perce, ID  | 522             | (471,573)              | 545             | 1.04              | 23            | (-28,74)             | 57                        | 46              | 200.0                     |
| Oneida, ID     | 52              | (36,67)                | 44              | 0.85              | -8            | (-23,8)              | -172                      | 5               | NA                        |
| Owyhee, ID     | 105             | (85,128)               | 140             | 1.33              | 35            | (12,55)              | 296                       | 18              | 51.4                      |
| Payette, ID    | 263             | (229,302)              | 270             | 1.03              | 7             | (-32,41)             | 29                        | 27              | 385.7                     |
| Power, ID      | 67              | (50,86)                | 75              | 1.12              | 8             | (-11,25)             | 100                       | 5               | 62.5                      |
| Shoshone, ID   | 192             | (166,227)              | 192             | 1.00              | 0             | (-35,26)             | 0                         | 28              | Inf                       |
| Teton, ID      | 54              | (40,70)                | 47              | 0.87              | -7            | (-23,7)              | -58                       | 5               | NA                        |
| Twin Falls, ID | 797             | (739,862)              | 983             | 1.23              | 186           | (121,244)            | 212                       | 111             | 59.7                      |
| Valley, ID     | 87              | (66,105)               | 92              | 1.06              | 5             | (-13,26)             | 43                        | 5               | 100.0                     |
| Washington, ID | 125             | (106,154)              | 160             | 1.28              | 35            | (6,54)               | 338                       | 15              | 42.9                      |
| Adams, IL      | 827             | (757,889)              | 877             | 1.06              | 50            | (-12,120)            | 77                        | 85              | 170.0                     |



Table C1: Primary Estimates for Each County

| County         | Expected Deaths | Expected Deaths 95% CI | Observed Deaths | Observed/Expected | Excess Deaths | Excess Deaths 95% CI | Excess Deaths Per 100,000 | COVID-19 Deaths | COVID-19 Excess Ratio (%) |
|----------------|-----------------|------------------------|-----------------|-------------------|---------------|----------------------|---------------------------|-----------------|---------------------------|
| Alexander, IL  | 95              | (81,123)               | 114             | 1.20              | 19            | (-9,33)              | 339                       | 13              | 68.4                      |
| Bond, IL       | 181             | (152,210)              | 200             | 1.10              | 19            | (-10,48)             | 114                       | 15              | 78.9                      |
| Boone, IL      | 461             | (415,508)              | 488             | 1.06              | 27            | (-20,73)             | 50                        | 65              | 240.7                     |
| Brown, IL      | 62              | (47,82)                | 70              | 1.13              | 8             | (-12,23)             | 124                       | 10              | 125.0                     |
| Bureau, IL     | 427             | (393,485)              | 477             | 1.12              | 50            | (-8,84)              | 153                       | 67              | 134.0                     |
| Calhoun, IL    | 52              | (38,71)                | 68              | 1.31              | 16            | (-3,30)              | 339                       | 5               | 31.2                      |
| Carroll, IL    | 187             | (156,218)              | 255             | 1.36              | 68            | (37,99)              | 487                       | 32              | 47.1                      |
| Cass, IL       | 143             | (120,172)              | 163             | 1.14              | 20            | (-9,43)              | 169                       | 28              | 140.0                     |
| Champaign, IL  | 1408            | (1337,1502)            | 1516            | 1.08              | 108           | (14,179)             | 51                        | 78              | 72.2                      |
| Christian, IL  | 433             | (390,483)              | 481             | 1.11              | 48            | (-2,91)              | 150                       | 65              | 135.4                     |
| Clark, IL      | 192             | (164,226)              | 228             | 1.19              | 36            | (2,64)               | 237                       | 22              | 61.1                      |
| Clay, IL       | 172             | (137,196)              | 194             | 1.13              | 22            | (-2,57)              | 167                       | 38              | 172.7                     |
| Clinton, IL    | 373             | (326,411)              | 419             | 1.12              | 46            | (8,93)               | 122                       | 46              | 100.0                     |
| Coles, IL      | 522             | (469,570)              | 624             | 1.20              | 102           | (54,155)             | 204                       | 59              | 57.8                      |
| Cook, IL       | 41439           | (40921,42215)          | 52078           | 1.26              | 10639         | (9863,11157)         | 207                       | 8046            | 75.6                      |
| Crawford, IL   | 226             | (187,258)              | 235             | 1.04              | 9             | (-23,48)             | 49                        | 32              | 355.6                     |
| Cumberland, IL | 113             | (87,135)               | 134             | 1.19              | 21            | (-1,47)              | 196                       | 20              | 95.2                      |
| DeKalb, IL     | 764             | (706,839)              | 894             | 1.17              | 130           | (55,188)             | 125                       | 68              | 52.3                      |
| De Witt, IL    | 220             | (195,263)              | 243             | 1.10              | 23            | (-20,48)             | 149                       | 25              | 108.7                     |
| Douglas, IL    | 198             | (166,228)              | 226             | 1.14              | 28            | (-2,60)              | 146                       | 33              | 117.9                     |
| DuPage, IL     | 6516            | (6370,6734)            | 7618            | 1.17              | 1102          | (884,1248)           | 119                       | 881             | 79.9                      |
| Edgar, IL      | 245             | (211,281)              | 287             | 1.17              | 42            | (6,76)               | 243                       | 40              | 95.2                      |
| Edwards, IL    | 75              | (59,99)                | 93              | 1.24              | 18            | (-6,34)              | 289                       | 11              | 61.1                      |
| Effingham, IL  | 380             | (331,416)              | 443             | 1.17              | 63            | (27,112)             | 184                       | 56              | 88.9                      |
| Fayette, IL    | 236             | (200,267)              | 272             | 1.15              | 36            | (5,72)               | 170                       | 42              | 116.7                     |
| Ford, IL       | 204             | (172,235)              | 237             | 1.16              | 33            | (2,65)               | 251                       | 30              | 90.9                      |
| Franklin, IL   | 500             | (451,549)              | 614             | 1.23              | 114           | (65,163)             | 299                       | 70              | 61.4                      |
| Fulton, IL     | 497             | (462,557)              | 546             | 1.10              | 49            | (-11,84)             | 143                       | 43              | 87.8                      |
| Gallatin, IL   | 81              | (65,103)               | 83              | 1.02              | 2             | (-20,18)             | 40                        | 5               | 250.0                     |
| Greene, IL     | 176             | (147,207)              | 199             | 1.13              | 23            | (-8,52)              | 180                       | 38              | 165.2                     |
| Grundy, IL     | 440             | (402,494)              | 545             | 1.24              | 105           | (51,143)             | 203                       | 49              | 46.7                      |
| Hamilton, IL   | 101             | (83,128)               | 131             | 1.30              | 30            | (3,48)               | 371                       | 11              | 36.7                      |
| Hancock, IL    | 215             | (189,256)              | 274             | 1.27              | 59            | (18,85)              | 336                       | 34              | 57.6                      |
| Hardin, IL     | 77              | (61,100)               | 73              | 0.95              | -4            | (-27,12)             | -104                      | 10              | NA                        |
| Henderson, IL  | 90              | (73,113)               | 107             | 1.19              | 17            | (-6,34)              | 262                       | 15              | 88.2                      |
| Henry, IL      | 548             | (496,597)              | 689             | 1.26              | 141           | (92,193)             | 289                       | 70              | 49.6                      |
| Iroquois, IL   | 399             | (353,443)              | 443             | 1.11              | 44            | (0,90)               | 162                       | 53              | 120.5                     |
| Jackson, IL    | 491             | (446,546)              | 614             | 1.25              | 123           | (68,168)             | 218                       | 74              | 60.2                      |
| Jasper, IL     | 100             | (79,123)               | 102             | 1.02              | 2             | (-21,23)             | 21                        | 15              | 750.0                     |
| Jefferson, IL  | 461             | (423,518)              | 559             | 1.21              | 98            | (41,136)             | 263                       | 79              | 80.6                      |
| Jersey, IL     | 296             | (268,348)              | 324             | 1.09              | 28            | (-24,56)             | 129                       | 39              | 139.3                     |
| Jo Daviess, IL | 246             | (211,281)              | 303             | 1.23              | 57            | (22,92)              | 272                       | 25              | 43.9                      |
| Johnson, IL    | 147             | (125,179)              | 164             | 1.12              | 17            | (-15,39)             | 136                       | 20              | 117.6                     |
| Kane, IL       | 3497            | (3385,3638)            | 4186            | 1.20              | 689           | (548,801)            | 129                       | 558             | 81.0                      |
| Kankakee, IL   | 1229            | (1161,1317)            | 1353            | 1.10              | 124           | (36,192)             | 114                       | 142             | 114.5                     |
| Kendall, IL    | 644             | (588,700)              | 769             | 1.19              | 125           | (69,181)             | 95                        | 78              | 62.4                      |
| Knox, IL       | 681             | (629,741)              | 816             | 1.20              | 135           | (75,187)             | 275                       | 115             | 85.2                      |
| Lake, IL       | 4934            | (4809,5134)            | 5735            | 1.16              | 801           | (601,926)            | 115                       | 749             | 93.5                      |
| LaSalle, IL    | 1361            | (1282,1451)            | 1524            | 1.12              | 163           | (73,242)             | 150                       | 207             | 127.0                     |
| Lawrence, IL   | 197             | (166,224)              | 213             | 1.08              | 16            | (-11,47)             | 105                       | 34              | 212.5                     |
| Lee, IL        | 396             | (358,447)              | 459             | 1.16              | 63            | (12,101)             | 187                       | 75              | 119.0                     |
| Livingston, IL | 469             | (427,524)              | 507             | 1.08              | 38            | (-17,80)             | 108                       | 58              | 152.6                     |
| Logan, IL      | 383             | (337,423)              | 415             | 1.08              | 32            | (-8,78)              | 111                       | 48              | 150.0                     |
| McDonough, IL  | 335             | (298,382)              | 370             | 1.10              | 35            | (-12,72)             | 120                       | 44              | 125.7                     |
| McHenry, IL    | 2281            | (2190,2405)            | 2575            | 1.13              | 294           | (170,385)            | 95                        | 251             | 85.4                      |
| McLean, IL     | 1287            | (1217,1374)            | 1428            | 1.11              | 141           | (54,211)             | 82                        | 131             | 92.9                      |
| Macon, IL      | 1295            | (1228,1385)            | 1448            | 1.12              | 153           | (63,220)             | 148                       | 159             | 103.9                     |
| Macoupin, IL   | 576             | (526,636)              | 663             | 1.15              | 87            | (27,137)             | 194                       | 71              | 81.6                      |
| Madison, IL    | 3051            | (2960,3215)            | 3385            | 1.11              | 334           | (170,425)            | 127                       | 330             | 98.8                      |
| Marion, IL     | 542             | (480,582)              | 651             | 1.20              | 109           | (69,171)             | 293                       | 95              | 87.2                      |
| Marshall, IL   | 172             | (142,199)              | 173             | 1.01              | 1             | (-26,31)             | 9                         | 5               | 500.0                     |
| Mason, IL      | 189             | (164,225)              | 235             | 1.24              | 46            | (10,71)              | 345                       | 35              | 76.1                      |
| Massac, IL     | 205             | (172,234)              | 240             | 1.17              | 35            | (6,68)               | 257                       | 28              | 80.0                      |
| Menard, IL     | 130             | (107,156)              | 129             | 0.99              | -1            | (-27,22)             | -8                        | 13              | NA                        |

Table C1: Primary Estimates for Each County

| County          | Expected Deaths | Expected Deaths 95% CI | Observed Deaths | Observed/Expected | Excess Deaths | Excess Deaths 95% CI | Excess Deaths Per 100,000 | COVID-19 Deaths | COVID-19 Excess Ratio (%) |
|-----------------|-----------------|------------------------|-----------------|-------------------|---------------|----------------------|---------------------------|-----------------|---------------------------|
| Mercer, IL      | 214             | (183,249)              | 222             | 1.04              | 8             | (-27,39)             | 51                        | 19              | 237.5                     |
| Monroe, IL      | 318             | (282,360)              | 372             | 1.17              | 54            | (12,90)              | 156                       | 48              | 88.9                      |
| Montgomery, IL  | 373             | (338,423)              | 423             | 1.13              | 50            | (0,85)               | 177                       | 31              | 62.0                      |
| Morgan, IL      | 415             | (377,465)              | 485             | 1.17              | 70            | (20,108)             | 209                       | 77              | 110.0                     |
| Moultrie, IL    | 195             | (170,229)              | 216             | 1.11              | 21            | (-13,46)             | 142                       | 21              | 100.0                     |
| Ogle, IL        | 559             | (512,616)              | 611             | 1.09              | 52            | (-5,99)              | 103                       | 63              | 121.2                     |
| Peoria, IL      | 1856            | (1760,1959)            | 2106            | 1.13              | 250           | (147,346)            | 141                       | 227             | 90.8                      |
| Perry, IL       | 245             | (211,278)              | 266             | 1.09              | 21            | (-12,55)             | 100                       | 35              | 166.7                     |
| Piatt, IL       | 164             | (143,198)              | 189             | 1.15              | 25            | (-9,46)              | 154                       | 10              | 40.0                      |
| Pike, IL        | 207             | (176,242)              | 255             | 1.23              | 48            | (13,79)              | 310                       | 41              | 85.4                      |
| Pope, IL        | 53              | (38,70)                | 53              | 1.00              | 0             | (-17,15)             | 0                         | 5               | Inf                       |
| Pulaski, IL     | 80              | (59,97)                | 79              | 0.99              | -1            | (-18,20)             | -19                       | 5               | NA                        |
| Putnam, IL      | 63              | (46,81)                | 59              | 0.94              | -4            | (-22,13)             | -69                       | 5               | NA                        |
| Randolph, IL    | 377             | (338,417)              | 432             | 1.15              | 55            | (15,94)              | 173                       | 56              | 101.8                     |
| Richland, IL    | 219             | (181,246)              | 267             | 1.22              | 48            | (21,86)              | 308                       | 30              | 62.5                      |
| Rock Island, IL | 1645            | (1564,1748)            | 1949            | 1.18              | 304           | (201,385)            | 214                       | 230             | 75.7                      |
| St. Clair, IL   | 2701            | (2610,2845)            | 3169            | 1.17              | 468           | (324,559)            | 181                       | 350             | 74.8                      |
| Saline, IL      | 394             | (353,438)              | 404             | 1.03              | 10            | (-34,51)             | 42                        | 44              | 440.0                     |
| Sangamon, IL    | 2063            | (1970,2171)            | 2226            | 1.08              | 163           | (55,256)             | 85                        | 204             | 125.2                     |
| Schuyler, IL    | 102             | (78,121)               | 98              | 0.96              | -4            | (-23,20)             | -59                       | 14              | NA                        |
| Scott, IL       | 58              | (43,76)                | 68              | 1.17              | 10            | (-8,25)              | 207                       | 5               | 50.0                      |
| Shelby, IL      | 254             | (218,291)              | 277             | 1.09              | 23            | (-14,59)             | 106                       | 35              | 152.2                     |
| Stark, IL       | 78              | (55,92)                | 87              | 1.12              | 9             | (-5,32)              | 168                       | 12              | 133.3                     |
| Stephenson, IL  | 585             | (539,648)              | 684             | 1.17              | 99            | (36,145)             | 224                       | 68              | 68.7                      |
| Tazewell, IL    | 1429            | (1332,1506)            | 1674            | 1.17              | 245           | (168,342)            | 188                       | 202             | 82.4                      |
| Union, IL       | 229             | (200,268)              | 284             | 1.24              | 55            | (16,84)              | 332                       | 29              | 52.7                      |
| Vermilion, IL   | 991             | (926,1067)             | 1104            | 1.11              | 113           | (37,178)             | 151                       | 94              | 83.2                      |
| Wabash, IL      | 120             | (99,146)               | 159             | 1.32              | 39            | (13,60)              | 338                       | 18              | 46.2                      |
| Warren, IL      | 188             | (161,221)              | 255             | 1.36              | 67            | (34,94)              | 400                       | 36              | 53.7                      |
| Washington, IL  | 153             | (124,177)              | 183             | 1.20              | 30            | (6,59)               | 213                       | 21              | 70.0                      |
| Wayne, IL       | 203             | (180,241)              | 245             | 1.21              | 42            | (4,65)               | 261                       | 38              | 90.5                      |
| White, IL       | 228             | (200,266)              | 255             | 1.12              | 27            | (-11,55)             | 205                       | 32              | 118.5                     |
| Whiteside, IL   | 696             | (642,766)              | 819             | 1.18              | 123           | (53,177)             | 224                       | 159             | 129.3                     |
| Will, IL        | 5104            | (4995,5318)            | 5892            | 1.15              | 788           | (574,897)            | 113                       | 701             | 89.0                      |
| Williamson, IL  | 761             | (697,821)              | 872             | 1.15              | 111           | (51,175)             | 166                       | 91              | 82.0                      |
| Winnebago, IL   | 3179            | (3057,3319)            | 3486            | 1.10              | 307           | (167,429)            | 109                       | 371             | 120.8                     |
| Woodford, IL    | 396             | (351,437)              | 449             | 1.13              | 53            | (12,98)              | 139                       | 53              | 100.0                     |
| Adams, IN       | 317             | (281,357)              | 397             | 1.25              | 80            | (40,116)             | 222                       | 46              | 57.5                      |
| Allen, IN       | 3649            | (3533,3807)            | 4051            | 1.11              | 402           | (244,518)            | 105                       | 482             | 119.9                     |
| Bartholomew, IN | 773             | (714,835)              | 875             | 1.13              | 102           | (40,161)             | 122                       | 115             | 112.7                     |
| Benton, IN      | 90              | (70,109)               | 111             | 1.23              | 21            | (2,41)               | 241                       | 13              | 61.9                      |
| Blackford, IN   | 168             | (136,190)              | 207             | 1.23              | 39            | (17,71)              | 332                       | 24              | 61.5                      |
| Boone, IN       | 570             | (513,624)              | 614             | 1.08              | 44            | (-10,101)            | 63                        | 86              | 195.5                     |
| Brown, IN       | 171             | (143,200)              | 200             | 1.17              | 29            | (0,57)               | 185                       | 22              | 75.9                      |
| Carroll, IN     | 197             | (165,224)              | 198             | 1.01              | 1             | (-26,33)             | 5                         | 19              | 1900.0                    |
| Cass, IN        | 458             | (413,505)              | 507             | 1.11              | 49            | (2,94)               | 129                       | 84              | 171.4                     |
| Clark, IN       | 1364            | (1265,1431)            | 1472            | 1.08              | 108           | (41,207)             | 91                        | 140             | 129.6                     |
| Clay, IN        | 325             | (277,356)              | 363             | 1.12              | 38            | (7,86)               | 145                       | 39              | 102.6                     |
| Clinton, IN     | 379             | (322,408)              | 454             | 1.20              | 75            | (46,132)             | 232                       | 39              | 52.0                      |
| Crawford, IN    | 135             | (112,165)              | 141             | 1.04              | 6             | (-24,29)             | 57                        | 13              | 216.7                     |
| Daviess, IN     | 344             | (307,386)              | 407             | 1.18              | 63            | (21,100)             | 189                       | 78              | 123.8                     |
| Dearborn, IN    | 529             | (476,581)              | 559             | 1.06              | 30            | (-22,83)             | 61                        | 59              | 196.7                     |
| Decatur, IN     | 311             | (280,357)              | 367             | 1.18              | 56            | (10,87)              | 207                       | 63              | 112.5                     |
| De Kalb, IN     | 467             | (419,519)              | 530             | 1.13              | 63            | (11,111)             | 143                       | 70              | 111.1                     |
| Delaware, IN    | 1400            | (1348,1524)            | 1595            | 1.14              | 195           | (71,247)             | 172                       | 141             | 72.3                      |
| Dubois, IN      | 426             | (382,476)              | 495             | 1.16              | 69            | (19,113)             | 162                       | 61              | 88.4                      |
| Elkhart, IN     | 1809            | (1716,1919)            | 2093            | 1.16              | 284           | (174,377)            | 137                       | 349             | 122.9                     |
| Fayette, IN     | 344             | (300,384)              | 393             | 1.14              | 49            | (9,93)               | 215                       | 47              | 95.9                      |
| Floyd, IN       | 883             | (833,974)              | 967             | 1.10              | 84            | (-7,134)             | 106                       | 107             | 127.4                     |
| Fountain, IN    | 224             | (199,269)              | 254             | 1.13              | 30            | (-15,55)             | 185                       | 28              | 93.3                      |
| Franklin, IN    | 215             | (186,251)              | 288             | 1.34              | 73            | (37,102)             | 321                       | 32              | 43.8                      |
| Fulton, IN      | 246             | (211,280)              | 290             | 1.18              | 44            | (10,79)              | 217                       | 35              | 79.5                      |
| Gibson, IN      | 392             | (350,434)              | 443             | 1.13              | 51            | (9,93)               | 154                       | 73              | 143.1                     |
| Grant, IN       | 900             | (841,975)              | 1052            | 1.17              | 152           | (77,211)             | 233                       | 129             | 84.9                      |

Table C1: Primary Estimates for Each County

| County          | Expected Deaths | Expected Deaths 95% CI | Observed Deaths | Observed/Expected | Excess Deaths | Excess Deaths 95% CI | Excess Deaths Per 100,000 | COVID-19 Deaths | COVID-19 to Excess Ratio (%) |
|-----------------|-----------------|------------------------|-----------------|-------------------|---------------|----------------------|---------------------------|-----------------|------------------------------|
| Greene, IN      | 416             | (384,471)              | 452             | 1.09              | 36            | (-19,68)             | 114                       | 65              | 180.6                        |
| Hamilton, IN    | 2040            | (1958,2164)            | 2353            | 1.15              | 313           | (189,395)            | 91                        | 305             | 97.4                         |
| Hancock, IN     | 715             | (658,767)              | 764             | 1.07              | 49            | (-3,106)             | 62                        | 85              | 173.5                        |
| Harrison, IN    | 443             | (402,501)              | 481             | 1.09              | 38            | (-20,79)             | 92                        | 43              | 113.2                        |
| Hendricks, IN   | 1360            | (1286,1453)            | 1535            | 1.13              | 175           | (82,249)             | 101                       | 205             | 117.1                        |
| Henry, IN       | 631             | (577,687)              | 710             | 1.13              | 79            | (23,133)             | 164                       | 69              | 87.3                         |
| Howard, IN      | 1174            | (1112,1268)            | 1268            | 1.08              | 94            | (0,156)              | 114                       | 150             | 159.6                        |
| Huntington, IN  | 421             | (379,474)              | 512             | 1.22              | 91            | (38,133)             | 251                       | 48              | 52.7                         |
| Jackson, IN     | 504             | (459,562)              | 556             | 1.10              | 52            | (-6,97)              | 117                       | 58              | 111.5                        |
| Jasper, IN      | 347             | (308,390)              | 430             | 1.24              | 83            | (40,122)             | 250                       | 39              | 47.0                         |
| Jay, IN         | 242             | (209,274)              | 261             | 1.08              | 19            | (-13,52)             | 93                        | 39              | 205.3                        |
| Jefferson, IN   | 402             | (358,443)              | 450             | 1.12              | 48            | (7,92)               | 149                       | 52              | 108.3                        |
| Jennings, IN    | 336             | (301,380)              | 355             | 1.06              | 19            | (-25,54)             | 69                        | 35              | 184.2                        |
| Johnson, IN     | 1451            | (1365,1536)            | 1696            | 1.17              | 245           | (160,331)            | 152                       | 240             | 98.0                         |
| Knox, IN        | 449             | (405,500)              | 552             | 1.23              | 103           | (52,147)             | 282                       | 77              | 74.8                         |
| Kosciusko, IN   | 758             | (700,821)              | 840             | 1.11              | 82            | (19,140)             | 103                       | 76              | 92.7                         |
| Lagrange, IN    | 292             | (258,331)              | 352             | 1.21              | 60            | (21,94)              | 152                       | 76              | 126.7                        |
| Lake, IN        | 5310            | (5208,5568)            | 6148            | 1.16              | 838           | (580,940)            | 173                       | 695             | 82.9                         |
| La Porte, IN    | 1281            | (1205,1366)            | 1473            | 1.15              | 192           | (107,268)            | 175                       | 140             | 72.9                         |
| Lawrence, IN    | 574             | (530,635)              | 654             | 1.14              | 80            | (19,124)             | 175                       | 88              | 110.0                        |
| Madison, IN     | 1569            | (1488,1677)            | 1825            | 1.16              | 256           | (148,337)            | 198                       | 242             | 94.5                         |
| Marion, IN      | 8597            | (8375,8833)            | 10262           | 1.19              | 1665          | (1429,1887)          | 172                       | 1356            | 81.4                         |
| Marshall, IN    | 481             | (439,531)              | 596             | 1.24              | 115           | (65,157)             | 251                       | 84              | 73.0                         |
| Martin, IN      | 120             | (99,147)               | 117             | 0.98              | -3            | (-30,18)             | -29                       | 14              | NA                           |
| Miami, IN       | 402             | (352,440)              | 456             | 1.13              | 54            | (16,104)             | 154                       | 47              | 87.0                         |
| Monroe, IN      | 1019            | (951,1091)             | 1209            | 1.19              | 190           | (118,258)            | 129                       | 121             | 63.7                         |
| Montgomery, IN  | 435             | (394,488)              | 484             | 1.11              | 49            | (-4,90)              | 128                       | 65              | 132.7                        |
| Morgan, IN      | 776             | (719,850)              | 854             | 1.10              | 78            | (4,135)              | 110                       | 98              | 125.6                        |
| Newton, IN      | 169             | (144,202)              | 193             | 1.14              | 24            | (-9,49)              | 172                       | 26              | 108.3                        |
| Noble, IN       | 475             | (443,542)              | 520             | 1.09              | 45            | (-22,77)             | 94                        | 55              | 122.2                        |
| Ohio, IN        | 75              | (58,95)                | 77              | 1.03              | 2             | (-18,19)             | 34                        | 16              | 800.0                        |
| Orange, IN      | 244             | (212,279)              | 301             | 1.23              | 57            | (22,89)              | 290                       | 37              | 64.9                         |
| Owen, IN        | 258             | (227,299)              | 309             | 1.20              | 51            | (10,82)              | 244                       | 34              | 66.7                         |
| Parke, IN       | 160             | (135,189)              | 176             | 1.10              | 16            | (-13,41)             | 95                        | 12              | 75.0                         |
| Perry, IN       | 232             | (209,273)              | 242             | 1.04              | 10            | (-31,33)             | 53                        | 28              | 280.0                        |
| Pike, IN        | 163             | (133,187)              | 185             | 1.13              | 22            | (-2,52)              | 175                       | 27              | 122.7                        |
| Porter, IN      | 1660            | (1579,1763)            | 1861            | 1.12              | 201           | (98,282)             | 117                       | 200             | 99.5                         |
| Posey, IN       | 264             | (227,301)              | 271             | 1.03              | 7             | (-30,44)             | 27                        | 22              | 314.3                        |
| Pulaski, IN     | 163             | (142,198)              | 188             | 1.15              | 25            | (-10,46)             | 202                       | 32              | 128.0                        |
| Putnam, IN      | 385             | (347,432)              | 434             | 1.13              | 49            | (2,87)               | 129                       | 43              | 87.8                         |
| Randolph, IN    | 333             | (306,383)              | 377             | 1.13              | 44            | (-6,71)              | 179                       | 57              | 129.5                        |
| Ripley, IN      | 326             | (287,363)              | 382             | 1.17              | 56            | (19,95)              | 196                       | 48              | 85.7                         |
| Rush, IN        | 203             | (173,235)              | 221             | 1.09              | 18            | (-14,48)             | 108                       | 18              | 100.0                        |
| St. Joseph, IN  | 2875            | (2765,3022)            | 3294            | 1.15              | 419           | (272,529)            | 154                       | 417             | 99.5                         |
| Scott, IN       | 346             | (313,395)              | 397             | 1.15              | 51            | (2,84)               | 213                       | 44              | 86.3                         |
| Shelby, IN      | 499             | (459,556)              | 591             | 1.18              | 92            | (35,132)             | 205                       | 69              | 75.0                         |
| Spencer, IN     | 218             | (191,257)              | 239             | 1.10              | 21            | (-18,48)             | 104                       | 12              | 57.1                         |
| Starke, IN      | 277             | (242,316)              | 354             | 1.28              | 77            | (38,112)             | 336                       | 52              | 67.5                         |
| Steuben, IN     | 345             | (308,390)              | 383             | 1.11              | 38            | (-7,75)              | 109                       | 33              | 86.8                         |
| Sullivan, IN    | 237             | (197,263)              | 267             | 1.13              | 30            | (4,70)               | 146                       | 28              | 93.3                         |
| Switzerland, IN | 115             | (91,136)               | 104             | 0.90              | -11           | (-32,13)             | -102                      | 5               | NA                           |
| Tippecanoe, IN  | 1281            | (1198,1362)            | 1377            | 1.07              | 96            | (15,179)             | 49                        | 100             | 104.2                        |
| Tipton, IN      | 185             | (160,219)              | 222             | 1.20              | 37            | (3,62)               | 245                       | 40              | 108.1                        |
| Union, IN       | 79              | (62,101)               | 106             | 1.34              | 27            | (5,44)               | 398                       | 5               | 18.5                         |
| Vanderburgh, IN | 2081            | (1991,2204)            | 2405            | 1.16              | 324           | (201,414)            | 179                       | 261             | 80.6                         |
| Vermillion, IN  | 207             | (174,238)              | 220             | 1.06              | 13            | (-18,46)             | 84                        | 26              | 200.0                        |
| Vigo, IN        | 1194            | (1121,1275)            | 1378            | 1.15              | 184           | (103,257)            | 172                       | 157             | 85.3                         |
| Wabash, IN      | 470             | (447,545)              | 522             | 1.11              | 52            | (-23,75)             | 168                       | 56              | 107.7                        |
| Warren, IN      | 89              | (71,111)               | 123             | 1.38              | 34            | (12,52)              | 405                       | 5               | 14.7                         |
| Warrick, IN     | 662             | (614,731)              | 797             | 1.20              | 135           | (66,183)             | 215                       | 95              | 70.4                         |
| Washington, IN  | 333             | (289,369)              | 346             | 1.04              | 13            | (-23,57)             | 46                        | 20              | 153.8                        |
| Wayne, IN       | 980             | (910,1065)             | 1093            | 1.12              | 113           | (28,183)             | 173                       | 143             | 126.5                        |
| Wells, IN       | 340             | (301,378)              | 379             | 1.11              | 39            | (1,78)               | 136                       | 50              | 128.2                        |
| White, IN       | 321             | (285,360)              | 343             | 1.07              | 22            | (-17,58)             | 91                        | 31              | 140.9                        |

Table C1: Primary Estimates for Each County

| County          | Expected Deaths | Expected Deaths 95% CI | Observed Deaths | Observed/Expected | Excess Deaths | Excess Deaths 95% CI | Excess Deaths Per 100,000 | COVID-19 Deaths | COVID-19 Excess Ratio (%) |
|-----------------|-----------------|------------------------|-----------------|-------------------|---------------|----------------------|---------------------------|-----------------|---------------------------|
| Whitley, IN     | 337             | (303,386)              | 372             | 1.10              | 35            | (-14,69)             | 101                       | 27              | 77.1                      |
| Adair, IA       | 98              | (73,116)               | 119             | 1.21              | 21            | (3,46)               | 297                       | 21              | 100.0                     |
| Adams, IA       | 41              | (27,54)                | 46              | 1.12              | 5             | (-8,19)              | 138                       | 5               | 100.0                     |
| Allamakee, IA   | 186             | (159,220)              | 221             | 1.19              | 35            | (1,62)               | 252                       | 33              | 94.3                      |
| Appanoose, IA   | 178             | (143,202)              | 210             | 1.18              | 32            | (8,67)               | 254                       | 42              | 131.2                     |
| Audubon, IA     | 88              | (72,112)               | 78              | 0.89              | -10           | (-34,6)              | -186                      | 5               | NA                        |
| Benton, IA      | 266             | (229,306)              | 308             | 1.16              | 42            | (2,79)               | 164                       | 52              | 123.8                     |
| Black Hawk, IA  | 1303            | (1248,1411)            | 1505            | 1.16              | 202           | (94,257)             | 153                       | 255             | 126.2                     |
| Boone, IA       | 298             | (264,340)              | 331             | 1.11              | 33            | (-9,67)              | 127                       | 17              | 51.5                      |
| Bremer, IA      | 247             | (214,279)              | 316             | 1.28              | 69            | (37,102)             | 274                       | 49              | 71.0                      |
| Buchanan, IA    | 215             | (187,252)              | 239             | 1.11              | 24            | (-13,52)             | 113                       | 24              | 100.0                     |
| Buena Vista, IA | 167             | (135,192)              | 208             | 1.25              | 41            | (16,73)              | 211                       | 34              | 82.9                      |
| Butler, IA      | 202             | (179,242)              | 192             | 0.95              | -10           | (-50,13)             | -69                       | 25              | NA                        |
| Calhoun, IA     | 137             | (111,162)              | 136             | 0.99              | -1            | (-26,25)             | -10                       | 5               | NA                        |
| Carroll, IA     | 238             | (201,266)              | 286             | 1.20              | 48            | (20,85)              | 241                       | 42              | 87.5                      |
| Cass, IA        | 209             | (176,241)              | 235             | 1.12              | 26            | (-6,59)              | 207                       | 43              | 165.4                     |
| Cedar, IA       | 183             | (156,213)              | 209             | 1.14              | 26            | (-4,53)              | 139                       | 19              | 73.1                      |
| Cerro Gordo, IA | 544             | (501,607)              | 628             | 1.15              | 84            | (21,127)             | 200                       | 78              | 92.9                      |
| Cherokee, IA    | 168             | (140,197)              | 189             | 1.12              | 21            | (-8,49)              | 186                       | 31              | 147.6                     |
| Chickasaw, IA   | 136             | (116,167)              | 170             | 1.25              | 34            | (3,54)               | 288                       | 12              | 35.3                      |
| Clarke, IA      | 114             | (95,142)               | 114             | 1.00              | 0             | (-28,19)             | 0                         | 5               | Inf                       |
| Clay, IA        | 184             | (154,215)              | 215             | 1.17              | 31            | (0,61)               | 193                       | 20              | 64.5                      |
| Clayton, IA     | 208             | (181,244)              | 250             | 1.20              | 42            | (6,69)               | 242                       | 51              | 121.4                     |
| Clinton, IA     | 588             | (530,638)              | 617             | 1.05              | 29            | (-21,87)             | 63                        | 78              | 269.0                     |
| Crawford, IA    | 184             | (154,213)              | 198             | 1.08              | 14            | (-15,44)             | 81                        | 26              | 185.7                     |
| Dallas, IA      | 570             | (519,628)              | 637             | 1.12              | 67            | (9,118)              | 70                        | 74              | 110.4                     |
| Davis, IA       | 90              | (70,111)               | 102             | 1.13              | 12            | (-9,32)              | 132                       | 21              | 175.0                     |
| Decatur, IA     | 87              | (67,108)               | 95              | 1.09              | 8             | (-13,28)             | 103                       | 5               | 62.5                      |
| Delaware, IA    | 178             | (151,211)              | 218             | 1.22              | 40            | (7,67)               | 237                       | 36              | 90.0                      |
| Des Moines, IA  | 477             | (443,537)              | 512             | 1.07              | 35            | (-25,69)             | 90                        | 46              | 131.4                     |
| Dickinson, IA   | 206             | (176,235)              | 245             | 1.19              | 39            | (10,69)              | 228                       | 32              | 82.1                      |
| Dubuque, IA     | 935             | (874,1008)             | 1034            | 1.11              | 99            | (26,160)             | 103                       | 161             | 162.6                     |
| Emmet, IA       | 122             | (99,146)               | 157             | 1.29              | 35            | (11,58)              | 392                       | 34              | 97.1                      |
| Fayette, IA     | 259             | (219,291)              | 295             | 1.14              | 36            | (4,76)               | 184                       | 28              | 77.8                      |
| Floyd, IA       | 173             | (138,195)              | 241             | 1.39              | 68            | (46,103)             | 432                       | 38              | 55.9                      |
| Franklin, IA    | 127             | (105,157)              | 155             | 1.22              | 28            | (-2,50)              | 278                       | 19              | 67.9                      |
| Fremont, IA     | 97              | (74,117)               | 89              | 0.92              | -8            | (-28,15)             | -113                      | 5               | NA                        |
| Greene, IA      | 124             | (97,146)               | 108             | 0.87              | -16           | (-38,11)             | -178                      | 5               | NA                        |
| Grundy, IA      | 165             | (144,203)              | 168             | 1.02              | 3             | (-35,24)             | 24                        | 31              | 1033.3                    |
| Guthrie, IA     | 130             | (105,156)              | 155             | 1.19              | 25            | (-1,50)              | 231                       | 25              | 100.0                     |
| Hamilton, IA    | 187             | (162,223)              | 214             | 1.14              | 27            | (-9,52)              | 183                       | 35              | 129.6                     |
| Hancock, IA     | 119             | (94,141)               | 135             | 1.13              | 16            | (-6,41)              | 151                       | 26              | 162.5                     |
| Hardin, IA      | 214             | (181,246)              | 254             | 1.19              | 40            | (8,73)               | 241                       | 32              | 80.0                      |
| Harrison, IA    | 190             | (159,218)              | 266             | 1.40              | 76            | (48,107)             | 537                       | 65              | 85.5                      |
| Henry, IA       | 216             | (183,251)              | 289             | 1.34              | 73            | (38,106)             | 364                       | 35              | 47.9                      |
| Howard, IA      | 129             | (111,160)              | 124             | 0.96              | -5            | (-36,13)             | -55                       | 20              | NA                        |
| Humboldt, IA    | 116             | (96,143)               | 132             | 1.14              | 16            | (-11,36)             | 169                       | 23              | 143.8                     |
| Ida, IA         | 109             | (93,138)               | 129             | 1.18              | 20            | (-9,36)              | 294                       | 32              | 160.0                     |
| Iowa, IA        | 201             | (177,240)              | 238             | 1.18              | 37            | (-2,61)              | 229                       | 23              | 62.2                      |
| Jackson, IA     | 229             | (194,261)              | 264             | 1.15              | 35            | (3,70)               | 179                       | 35              | 100.0                     |
| Jasper, IA      | 415             | (368,459)              | 473             | 1.14              | 58            | (14,105)             | 155                       | 62              | 106.9                     |
| Jefferson, IA   | 187             | (160,221)              | 213             | 1.14              | 26            | (-8,53)              | 139                       | 28              | 107.7                     |
| Johnson, IA     | 802             | (747,870)              | 856             | 1.07              | 54            | (-14,109)            | 35                        | 58              | 107.4                     |
| Jones, IA       | 203             | (173,236)              | 239             | 1.18              | 36            | (3,66)               | 173                       | 51              | 141.7                     |
| Keokuk, IA      | 131             | (109,157)              | 152             | 1.16              | 21            | (-5,43)              | 202                       | 26              | 123.8                     |
| Kossuth, IA     | 178             | (148,204)              | 209             | 1.17              | 31            | (5,61)               | 210                       | 48              | 154.8                     |
| Lee, IA         | 435             | (398,492)              | 508             | 1.17              | 73            | (16,110)             | 217                       | 39              | 53.4                      |
| Linn, IA        | 1893            | (1795,1988)            | 2269            | 1.20              | 376           | (281,474)            | 164                       | 292             | 77.7                      |
| Louisa, IA      | 117             | (96,143)               | 123             | 1.05              | 6             | (-20,27)             | 54                        | 35              | 583.3                     |
| Lucas, IA       | 120             | (94,141)               | 125             | 1.04              | 5             | (-16,31)             | 57                        | 13              | 260.0                     |
| Lyon, IA        | 110             | (85,131)               | 128             | 1.16              | 18            | (-3,43)              | 152                       | 39              | 216.7                     |
| Madison, IA     | 164             | (135,189)              | 155             | 0.95              | -9            | (-34,20)             | -54                       | 11              | NA                        |
| Mahaska, IA     | 245             | (222,289)              | 295             | 1.20              | 50            | (6,73)               | 231                       | 42              | 84.0                      |
| Marion, IA      | 361             | (323,409)              | 383             | 1.06              | 22            | (-26,60)             | 65                        | 58              | 263.6                     |

Table C1: Primary Estimates for Each County

| County            | Expected Deaths | Expected Deaths 95% CI | Observed Deaths | Observed/Expected | Excess Deaths | Excess Deaths 95% CI | Excess Deaths Per 100,000 | COVID-19 Deaths | COVID-19 to Excess Ratio (%) |
|-------------------|-----------------|------------------------|-----------------|-------------------|---------------|----------------------|---------------------------|-----------------|------------------------------|
| Marshall, IA      | 492             | (444,535)              | 563             | 1.14              | 71            | (28,119)             | 179                       | 65              | 91.5                         |
| Mills, IA         | 130             | (108,159)              | 157             | 1.21              | 27            | (-2,49)              | 179                       | 17              | 63.0                         |
| Mitchell, IA      | 145             | (122,175)              | 157             | 1.08              | 12            | (-18,35)             | 114                       | 38              | 316.7                        |
| Monona, IA        | 142             | (117,171)              | 188             | 1.32              | 46            | (17,71)              | 538                       | 18              | 39.1                         |
| Monroe, IA        | 105             | (83,125)               | 121             | 1.15              | 16            | (-4,38)              | 207                       | 19              | 118.8                        |
| Montgomery, IA    | 154             | (131,188)              | 187             | 1.21              | 33            | (-1,56)              | 337                       | 31              | 93.9                         |
| Muscatine, IA     | 430             | (385,479)              | 513             | 1.19              | 83            | (34,128)             | 193                       | 86              | 103.6                        |
| O'Brien, IA       | 213             | (179,240)              | 254             | 1.19              | 41            | (14,75)              | 295                       | 56              | 136.6                        |
| Osceola, IA       | 73              | (56,91)                | 91              | 1.25              | 18            | (0,35)               | 298                       | 12              | 66.7                         |
| Page, IA          | 200             | (170,232)              | 212             | 1.06              | 12            | (-20,42)             | 79                        | 16              | 133.3                        |
| Palo Alto, IA     | 127             | (108,159)              | 140             | 1.10              | 13            | (-19,32)             | 150                       | 12              | 92.3                         |
| Plymouth, IA      | 254             | (220,299)              | 303             | 1.19              | 49            | (4,83)               | 195                       | 71              | 144.9                        |
| Pocahontas, IA    | 99              | (79,122)               | 105             | 1.06              | 6             | (-17,26)             | 92                        | 15              | 250.0                        |
| Polk, IA          | 3872            | (3748,4049)            | 4459            | 1.15              | 587           | (410,711)            | 118                       | 484             | 82.5                         |
| Pottawattamie, IA | 996             | (935,1076)             | 1182            | 1.19              | 186           | (106,247)            | 199                       | 125             | 67.2                         |
| Poweshiek, IA     | 217             | (185,250)              | 235             | 1.08              | 18            | (-15,50)             | 95                        | 27              | 150.0                        |
| Ringgold, IA      | 79              | (61,101)               | 108             | 1.37              | 29            | (7,47)               | 598                       | 10              | 34.5                         |
| Sac, IA           | 139             | (113,163)              | 154             | 1.11              | 15            | (-9,41)              | 157                       | 15              | 100.0                        |
| Scott, IA         | 1607            | (1520,1706)            | 1910            | 1.19              | 303           | (204,390)            | 174                       | 189             | 62.4                         |
| Shelby, IA        | 163             | (129,186)              | 188             | 1.15              | 25            | (2,59)               | 216                       | 29              | 116.0                        |
| Sioux, IA         | 244             | (208,279)              | 319             | 1.31              | 75            | (40,111)             | 214                       | 66              | 88.0                         |
| Story, IA         | 611             | (559,671)              | 563             | 0.92              | -48           | (-108,4)             | -48                       | 40              | NA                           |
| Tama, IA          | 216             | (183,246)              | 261             | 1.21              | 45            | (15,78)              | 271                       | 58              | 128.9                        |
| Taylor, IA        | 82              | (62,104)               | 92              | 1.12              | 10            | (-12,30)             | 159                       | 10              | 100.0                        |
| Union, IA         | 150             | (123,178)              | 183             | 1.22              | 33            | (5,60)               | 272                       | 26              | 78.8                         |
| Van Buren, IA     | 101             | (81,129)               | 95              | 0.94              | -6            | (-34,14)             | -89                       | 16              | NA                           |
| Wapello, IA       | 439             | (398,487)              | 517             | 1.18              | 78            | (30,119)             | 220                       | 97              | 124.4                        |
| Warren, IA        | 475             | (435,532)              | 504             | 1.06              | 29            | (-28,69)             | 55                        | 50              | 172.4                        |
| Washington, IA    | 252             | (216,286)              | 299             | 1.19              | 47            | (13,83)              | 215                       | 33              | 70.2                         |
| Wayne, IA         | 80              | (60,97)                | 105             | 1.31              | 25            | (8,45)               | 401                       | 21              | 84.0                         |
| Webster, IA       | 416             | (372,466)              | 556             | 1.34              | 140           | (90,184)             | 394                       | 80              | 57.1                         |
| Winnebago, IA     | 129             | (106,157)              | 163             | 1.26              | 34            | (6,57)               | 328                       | 29              | 85.3                         |
| Winneshiek, IA    | 201             | (175,233)              | 201             | 1.00              | 0             | (-32,26)             | 0                         | 25              | Inf                          |
| Woodbury, IA      | 1026            | (958,1099)             | 1215            | 1.18              | 189           | (116,257)            | 183                       | 188             | 99.5                         |
| Worth, IA         | 81              | (60,98)                | 79              | 0.98              | -2            | (-19,19)             | -27                       | 5               | NA                           |
| Wright, IA        | 185             | (158,216)              | 193             | 1.04              | 8             | (-23,35)             | 64                        | 26              | 325.0                        |
| Allen, KS         | 152             | (125,181)              | 152             | 1.00              | 0             | (-29,27)             | 0                         | 5               | Inf                          |
| Anderson, KS      | 111             | (88,138)               | 105             | 0.95              | -6            | (-33,17)             | -76                       | 5               | NA                           |
| Atchison, KS      | 177             | (147,201)              | 175             | 0.99              | -2            | (-26,28)             | -13                       | 5               | NA                           |
| Barber, KS        | 61              | (44,78)                | 79              | 1.30              | 18            | (1,35)               | 422                       | 5               | 27.8                         |
| Barton, KS        | 290             | (258,330)              | 375             | 1.29              | 85            | (45,117)             | 334                       | 40              | 47.1                         |
| Bourbon, KS       | 206             | (167,229)              | 204             | 0.99              | -2            | (-25,37)             | -14                       | 17              | NA                           |
| Brown, KS         | 144             | (127,181)              | 166             | 1.15              | 22            | (-15,39)             | 230                       | 31              | 140.9                        |
| Butler, KS        | 676             | (621,735)              | 764             | 1.13              | 88            | (29,143)             | 132                       | 43              | 48.9                         |
| Chase, KS         | 37              | (25,50)                | 30              | 0.81              | -7            | (-20,5)              | -271                      | 5               | NA                           |
| Chautauqua, KS    | 53              | (36,70)                | 47              | 0.89              | -6            | (-23,11)             | -184                      | 5               | NA                           |
| Cherokee, KS      | 286             | (266,342)              | 323             | 1.13              | 37            | (-19,57)             | 187                       | 31              | 83.8                         |
| Cheyenne, KS      | 36              | (24,49)                | 55              | 1.53              | 19            | (6,31)               | 731                       | 12              | 63.2                         |
| Clark, KS         | 31              | (19,42)                | 36              | 1.16              | 5             | (-6,17)              | 248                       | 5               | 100.0                        |
| Clay, KS          | 102             | (79,121)               | 116             | 1.14              | 14            | (-5,37)              | 176                       | 17              | 121.4                        |
| Cloud, KS         | 143             | (118,170)              | 149             | 1.04              | 6             | (-21,31)             | 72                        | 22              | 366.7                        |
| Coffey, KS        | 98              | (79,122)               | 107             | 1.09              | 9             | (-15,28)             | 109                       | 11              | 122.2                        |
| Comanche, KS      | 31              | (19,43)                | 33              | 1.06              | 2             | (-10,14)             | 117                       | 5               | 250.0                        |
| Cowley, KS        | 447             | (410,504)              | 487             | 1.09              | 40            | (-17,77)             | 115                       | 70              | 175.0                        |
| Crawford, KS      | 445             | (399,493)              | 572             | 1.29              | 127           | (79,173)             | 326                       | 56              | 44.1                         |
| Decatur, KS       | 43              | (31,60)                | 45              | 1.05              | 2             | (-15,14)             | 70                        | 5               | 250.0                        |
| Dickinson, KS     | 231             | (198,261)              | 241             | 1.04              | 10            | (-20,43)             | 54                        | 26              | 260.0                        |
| Doniphan, KS      | 102             | (82,124)               | 102             | 1.00              | 0             | (-22,20)             | 0                         | 10              | Inf                          |
| Douglas, KS       | 801             | (732,855)              | 872             | 1.09              | 71            | (17,140)             | 58                        | 63              | 88.7                         |
| Edwards, KS       | 45              | (34,63)                | 77              | 1.71              | 32            | (14,43)              | 1159                      | 12              | 37.5                         |
| Elk, KS           | 48              | (31,61)                | 43              | 0.90              | -5            | (-18,12)             | -202                      | 5               | NA                           |
| Ellis, KS         | 243             | (204,274)              | 302             | 1.24              | 59            | (28,98)              | 206                       | 60              | 101.7                        |
| Ellsworth, KS     | 85              | (59,99)                | 107             | 1.26              | 22            | (8,48)               | 368                       | 17              | 77.3                         |
| Finney, KS        | 243             | (210,280)              | 319             | 1.31              | 76            | (39,109)             | 210                       | 64              | 84.2                         |

Table C1: Primary Estimates for Each County

| County           | Expected Deaths | Expected Deaths 95% CI | Observed Deaths | Observed/Expected | Excess Deaths | Excess Deaths 95% CI | Excess Deaths Per 100,000 | COVID-19 Deaths | COVID-19 Excess Ratio (%) |
|------------------|-----------------|------------------------|-----------------|-------------------|---------------|----------------------|---------------------------|-----------------|---------------------------|
| Ford, KS         | 254             | (224,292)              | 312             | 1.23              | 58            | (20,88)              | 175                       | 45              | 77.6                      |
| Franklin, KS     | 291             | (259,330)              | 312             | 1.07              | 21            | (-18,53)             | 82                        | 25              | 119.0                     |
| Geary, KS        | 209             | (180,247)              | 247             | 1.18              | 38            | (0,67)               | 123                       | 27              | 71.1                      |
| Gove, KS         | 30              | (19,43)                | 55              | 1.83              | 25            | (12,36)              | 971                       | 20              | 80.0                      |
| Graham, KS       | 42              | (28,56)                | 34              | 0.81              | -8            | (-22,6)              | -324                      | 5               | NA                        |
| Grant, KS        | 62              | (48,82)                | 69              | 1.11              | 7             | (-13,21)             | 100                       | 16              | 228.6                     |
| Gray, KS         | 59              | (43,78)                | 62              | 1.05              | 3             | (-16,19)             | 49                        | 12              | 400.0                     |
| Greeley, KS      | 29              | (16,40)                | 29              | 1.00              | 0             | (-11,13)             | 0                         | 5               | Inf                       |
| Greenwood, KS    | 105             | (82,126)               | 99              | 0.94              | -6            | (-27,17)             | -100                      | 5               | NA                        |
| Hamilton, KS     | 21              | (11,31)                | 25              | 1.19              | 4             | (-6,14)              | 155                       | 0               | 0.0                       |
| Harper, KS       | 92              | (71,113)               | 108             | 1.17              | 16            | (-5,37)              | 299                       | 16              | 100.0                     |
| Harvey, KS       | 425             | (380,479)              | 458             | 1.08              | 33            | (-21,78)             | 98                        | 44              | 133.3                     |
| Haskell, KS      | 33              | (21,45)                | 28              | 0.85              | -5            | (-17,7)              | -127                      | 5               | NA                        |
| Hodgeman, KS     | 33              | (23,50)                | 22              | 0.67              | -11           | (-28,-1)             | -625                      | 5               | NA                        |
| Jackson, KS      | 147             | (117,168)              | 150             | 1.02              | 3             | (-18,33)             | 23                        | 12              | 400.0                     |
| Jefferson, KS    | 187             | (156,215)              | 209             | 1.12              | 22            | (-6,53)              | 116                       | 23              | 104.5                     |
| Jewell, KS       | 39              | (25,54)                | 41              | 1.05              | 2             | (-13,16)             | 71                        | 5               | 250.0                     |
| Johnson, KS      | 4324            | (4203,4515)            | 4722            | 1.09              | 398           | (207,519)            | 65                        | 512             | 128.6                     |
| Kearny, KS       | 28              | (17,41)                | 37              | 1.32              | 9             | (-4,20)              | 228                       | 10              | 111.1                     |
| Kingman, KS      | 243             | (225,296)              | 244             | 1.00              | 1             | (-52,19)             | 14                        | 34              | 3400.0                    |
| Kiowa, KS        | 33              | (24,50)                | 32              | 0.97              | -1            | (-18,8)              | -39                       | 5               | NA                        |
| Labette, KS      | 268             | (242,316)              | 289             | 1.08              | 21            | (-27,47)             | 107                       | 32              | 152.4                     |
| Lane, KS         | 34              | (23,47)                | 31              | 0.91              | -3            | (-16,8)              | -189                      | 5               | NA                        |
| Leavenworth, KS  | 672             | (619,741)              | 795             | 1.18              | 123           | (54,176)             | 150                       | 65              | 52.8                      |
| Lincoln, KS      | 33              | (21,48)                | 47              | 1.42              | 14            | (-1,26)              | 472                       | 5               | 35.7                      |
| Linn, KS         | 116             | (92,141)               | 147             | 1.27              | 31            | (6,55)               | 315                       | 5               | 16.1                      |
| Logan, KS        | 37              | (24,50)                | 42              | 1.14              | 5             | (-8,18)              | 174                       | 5               | 100.0                     |
| Lyon, KS         | 293             | (256,327)              | 362             | 1.24              | 69            | (35,106)             | 206                       | 71              | 102.9                     |
| McPherson, KS    | 372             | (329,412)              | 431             | 1.16              | 59            | (19,102)             | 209                       | 50              | 84.7                      |
| Marion, KS       | 170             | (143,198)              | 159             | 0.94              | -11           | (-39,16)             | -92                       | 10              | NA                        |
| Marshall, KS     | 144             | (122,178)              | 143             | 0.99              | -1            | (-35,21)             | -10                       | 24              | NA                        |
| Meade, KS        | 53              | (37,69)                | 67              | 1.26              | 14            | (-2,30)              | 356                       | 5               | 35.7                      |
| Miami, KS        | 326             | (280,360)              | 348             | 1.07              | 22            | (-12,68)             | 64                        | 24              | 109.1                     |
| Mitchell, KS     | 88              | (71,114)               | 94              | 1.07              | 6             | (-20,23)             | 99                        | 5               | 83.3                      |
| Montgomery, KS   | 450             | (396,491)              | 480             | 1.07              | 30            | (-11,84)             | 95                        | 46              | 153.3                     |
| Morris, KS       | 79              | (58,96)                | 94              | 1.19              | 15            | (-2,36)              | 266                       | 15              | 100.0                     |
| Morton, KS       | 36              | (26,54)                | 43              | 1.19              | 7             | (-11,17)             | 278                       | 5               | 71.4                      |
| Nemaha, KS       | 135             | (115,168)              | 184             | 1.36              | 49            | (16,69)              | 477                       | 46              | 93.9                      |
| Neosho, KS       | 207             | (180,245)              | 232             | 1.12              | 25            | (-13,52)             | 158                       | 18              | 72.0                      |
| Ness, KS         | 52              | (38,69)                | 62              | 1.19              | 10            | (-7,24)              | 361                       | 15              | 150.0                     |
| Norton, KS       | 74              | (60,99)                | 84              | 1.14              | 10            | (-15,24)             | 185                       | 24              | 240.0                     |
| Osage, KS        | 204             | (167,227)              | 279             | 1.37              | 75            | (52,112)             | 464                       | 23              | 30.7                      |
| Osborne, KS      | 58              | (37,70)                | 60              | 1.03              | 2             | (-10,23)             | 60                        | 5               | 250.0                     |
| Ottawa, KS       | 74              | (55,94)                | 80              | 1.08              | 6             | (-14,25)             | 104                       | 12              | 200.0                     |
| Pawnee, KS       | 97              | (79,120)               | 96              | 0.99              | -1            | (-24,17)             | -16                       | 10              | NA                        |
| Phillips, KS     | 71              | (56,94)                | 78              | 1.10              | 7             | (-16,22)             | 136                       | 16              | 228.6                     |
| Pottawatomie, KS | 188             | (156,215)              | 203             | 1.08              | 15            | (-12,47)             | 60                        | 16              | 106.7                     |
| Pratt, KS        | 117             | (95,143)               | 144             | 1.23              | 27            | (1,49)               | 296                       | 26              | 96.3                      |
| Rawlins, KS      | 47              | (32,62)                | 39              | 0.83              | -8            | (-23,7)              | -313                      | 5               | NA                        |
| Reno, KS         | 730             | (673,792)              | 867             | 1.19              | 137           | (75,194)             | 222                       | 107             | 78.1                      |
| Republic, KS     | 83              | (61,102)               | 82              | 0.99              | -1            | (-20,21)             | -22                       | 11              | NA                        |
| Rice, KS         | 121             | (98,146)               | 125             | 1.03              | 4             | (-21,27)             | 43                        | 12              | 300.0                     |
| Riley, KS        | 406             | (368,454)              | 414             | 1.02              | 8             | (-40,46)             | 11                        | 23              | 287.5                     |
| Rooks, KS        | 72              | (56,96)                | 65              | 0.90              | -7            | (-31,9)              | -143                      | 10              | NA                        |
| Rush, KS         | 73              | (57,95)                | 70              | 0.96              | -3            | (-25,13)             | -95                       | 13              | NA                        |
| Russell, KS      | 95              | (78,122)               | 148             | 1.56              | 53            | (26,70)              | 773                       | 20              | 37.7                      |
| Saline, KS       | 588             | (545,652)              | 655             | 1.11              | 67            | (3,110)              | 124                       | 84              | 125.4                     |
| Scott, KS        | 46              | (35,66)                | 62              | 1.35              | 16            | (-4,27)              | 333                       | 18              | 112.5                     |
| Sedgwick, KS     | 4744            | (4607,4921)            | 5735            | 1.21              | 991           | (814,1128)           | 193                       | 550             | 55.5                      |
| Seward, KS       | 128             | (106,156)              | 162             | 1.27              | 34            | (6,56)               | 162                       | 40              | 117.6                     |
| Shawnee, KS      | 2059            | (1965,2179)            | 2289            | 1.11              | 230           | (110,324)            | 131                       | 262             | 113.9                     |
| Sheridan, KS     | 29              | (17,42)                | 51              | 1.76              | 22            | (9,34)               | 867                       | 10              | 45.5                      |
| Sherman, KS      | 66              | (47,82)                | 67              | 1.02              | 1             | (-15,20)             | 17                        | 11              | 1100.0                    |
| Smith, KS        | 57              | (42,77)                | 54              | 0.95              | -3            | (-23,12)             | -85                       | 5               | NA                        |

Table C1: Primary Estimates for Each County

| County           | Expected Deaths | Expected Deaths 95% CI | Observed Deaths | Observed/Expected | Excess Deaths | Excess Deaths 95% CI | Excess Deaths Per 100,000 | COVID-19 Deaths | COVID-19 Excess Ratio (%) |
|------------------|-----------------|------------------------|-----------------|-------------------|---------------|----------------------|---------------------------|-----------------|---------------------------|
| Stafford, KS     | 61              | (44,78)                | 69              | 1.13              | 8             | (-9,25)              | 194                       | 5               | 62.5                      |
| Stanton, KS      | 23              | (13,35)                | 23              | 1.00              | 0             | (-12,10)             | 0                         | 5               | Inf                       |
| Stevens, KS      | 49              | (33,64)                | 57              | 1.16              | 8             | (-7,24)              | 145                       | 5               | 62.5                      |
| Sumner, KS       | 264             | (232,303)              | 316             | 1.20              | 52            | (13,84)              | 228                       | 44              | 84.6                      |
| Thomas, KS       | 86              | (67,108)               | 83              | 0.97              | -3            | (-25,16)             | -40                       | 10              | NA                        |
| Trego, KS        | 42              | (27,54)                | 50              | 1.19              | 8             | (-4,23)              | 298                       | 5               | 62.5                      |
| Wabaunsee, KS    | 62              | (45,78)                | 67              | 1.08              | 5             | (-11,22)             | 71                        | 5               | 100.0                     |
| Wallace, KS      | 15              | (6,23)                 | 20              | 1.33              | 5             | (-3,14)              | 343                       | 5               | 100.0                     |
| Washington, KS   | 72              | (52,86)                | 78              | 1.08              | 6             | (-8,26)              | 113                       | 10              | 166.7                     |
| Wichita, KS      | 22              | (11,31)                | 38              | 1.73              | 16            | (7,27)               | 778                       | 5               | 31.2                      |
| Wilson, KS       | 112             | (90,135)               | 124             | 1.11              | 12            | (-11,34)             | 140                       | 10              | 83.3                      |
| Woodson, KS      | 48              | (32,61)                | 60              | 1.25              | 12            | (-1,28)              | 368                       | 5               | 41.7                      |
| Wyandotte, KS    | 1413            | (1345,1512)            | 1723            | 1.22              | 310           | (211,378)            | 188                       | 227             | 73.2                      |
| Adair, KY        | 217             | (189,250)              | 309             | 1.42              | 92            | (59,120)             | 483                       | 46              | 50.0                      |
| Allen, KY        | 268             | (234,307)              | 269             | 1.00              | 1             | (-38,35)             | 5                         | 34              | 3400.0                    |
| Anderson, KY     | 267             | (233,302)              | 292             | 1.09              | 25            | (-10,59)             | 109                       | 13              | 52.0                      |
| Ballard, KY      | 112             | (91,138)               | 106             | 0.95              | -6            | (-32,15)             | -76                       | 5               | NA                        |
| Barren, KY       | 579             | (535,641)              | 612             | 1.06              | 33            | (-29,77)             | 74                        | 54              | 163.6                     |
| Bath, KY         | 163             | (136,193)              | 180             | 1.10              | 17            | (-13,44)             | 137                       | 10              | 58.8                      |
| Bell, KY         | 425             | (377,470)              | 441             | 1.04              | 16            | (-29,64)             | 62                        | 43              | 268.8                     |
| Boone, KY        | 1034            | (973,1113)             | 1088            | 1.05              | 54            | (-25,115)            | 40                        | 93              | 172.2                     |
| Bourbon, KY      | 263             | (235,307)              | 250             | 0.95              | -13           | (-57,15)             | -64                       | 5               | NA                        |
| Boyd, KY         | 696             | (655,775)              | 762             | 1.09              | 66            | (-13,107)            | 142                       | 58              | 87.9                      |
| Boyle, KY        | 361             | (330,415)              | 407             | 1.13              | 46            | (-8,77)              | 152                       | 51              | 110.9                     |
| Bracken, KY      | 102             | (79,123)               | 109             | 1.07              | 7             | (-14,30)             | 86                        | 5               | 71.4                      |
| Breathitt, KY    | 207             | (181,241)              | 214             | 1.03              | 7             | (-27,33)             | 57                        | 5               | 71.4                      |
| Breckinridge, KY | 241             | (198,270)              | 282             | 1.17              | 41            | (12,84)              | 197                       | 16              | 39.0                      |
| Bullitt, KY      | 751             | (696,817)              | 814             | 1.08              | 63            | (-3,118)             | 76                        | 70              | 111.1                     |
| Butler, KY       | 175             | (151,213)              | 213             | 1.22              | 38            | (0,62)               | 299                       | 24              | 63.2                      |
| Caldwell, KY     | 169             | (146,202)              | 186             | 1.10              | 17            | (-16,40)             | 133                       | 16              | 94.1                      |
| Calloway, KY     | 414             | (374,461)              | 469             | 1.13              | 55            | (8,95)               | 139                       | 41              | 74.5                      |
| Campbell, KY     | 915             | (855,988)              | 968             | 1.06              | 53            | (-20,113)            | 56                        | 65              | 122.6                     |
| Carlisle, KY     | 73              | (56,93)                | 82              | 1.12              | 9             | (-11,26)             | 193                       | 5               | 55.6                      |
| Carroll, KY      | 147             | (117,168)              | 148             | 1.01              | 1             | (-20,31)             | 9                         | 16              | 1600.0                    |
| Carter, KY       | 363             | (331,415)              | 369             | 1.02              | 6             | (-46,38)             | 22                        | 25              | 416.7                     |
| Casey, KY        | 202             | (173,234)              | 246             | 1.22              | 44            | (12,73)              | 274                       | 27              | 61.4                      |
| Christian, KY    | 659             | (620,733)              | 788             | 1.20              | 129           | (55,168)             | 177                       | 73              | 56.6                      |
| Clark, KY        | 463             | (413,511)              | 450             | 0.97              | -13           | (-61,37)             | -35                       | 19              | NA                        |
| Clay, KY         | 281             | (253,322)              | 275             | 0.98              | -6            | (-47,22)             | -30                       | 22              | NA                        |
| Clinton, KY      | 131             | (103,154)              | 174             | 1.33              | 43            | (20,71)              | 424                       | 22              | 51.2                      |
| Crittenden, KY   | 130             | (109,157)              | 135             | 1.04              | 5             | (-22,26)             | 57                        | 11              | 220.0                     |
| Cumberland, KY   | 106             | (84,129)               | 112             | 1.06              | 6             | (-17,28)             | 91                        | 5               | 83.3                      |
| Daviess, KY      | 1164            | (1109,1258)            | 1214            | 1.04              | 50            | (-44,105)            | 49                        | 104             | 208.0                     |
| Edmonson, KY     | 163             | (136,190)              | 164             | 1.01              | 1             | (-26,28)             | 8                         | 20              | 2000.0                    |
| Elliott, KY      | 83              | (69,108)               | 78              | 0.94              | -5            | (-30,9)              | -67                       | 5               | NA                        |
| Estill, KY       | 212             | (177,240)              | 219             | 1.03              | 7             | (-21,42)             | 50                        | 11              | 157.1                     |
| Fayette, KY      | 2618            | (2510,2738)            | 2906            | 1.11              | 288           | (168,396)            | 88                        | 168             | 58.3                      |
| Fleming, KY      | 180             | (147,208)              | 207             | 1.15              | 27            | (-1,60)              | 187                       | 18              | 66.7                      |
| Floyd, KY        | 561             | (518,625)              | 662             | 1.18              | 101           | (37,144)             | 288                       | 54              | 53.5                      |
| Franklin, KY     | 621             | (569,682)              | 629             | 1.01              | 8             | (-53,60)             | 16                        | 44              | 550.0                     |
| Fulton, KY       | 96              | (83,127)               | 117             | 1.22              | 21            | (-10,34)             | 353                       | 21              | 100.0                     |
| Gallatin, KY     | 111             | (88,134)               | 118             | 1.06              | 7             | (-16,30)             | 78                        | 14              | 200.0                     |
| Garrard, KY      | 206             | (178,241)              | 234             | 1.14              | 28            | (-7,56)              | 158                       | 25              | 89.3                      |
| Grant, KY        | 279             | (241,313)              | 282             | 1.01              | 3             | (-31,41)             | 12                        | 13              | 433.3                     |
| Graves, KY       | 480             | (446,546)              | 561             | 1.17              | 81            | (15,115)             | 215                       | 74              | 91.4                      |
| Grayson, KY      | 342             | (300,384)              | 382             | 1.12              | 40            | (-2,82)              | 151                       | 44              | 110.0                     |
| Green, KY        | 165             | (139,193)              | 170             | 1.03              | 5             | (-23,31)             | 45                        | 18              | 360.0                     |
| Greenup, KY      | 516             | (475,578)              | 570             | 1.10              | 54            | (-8,95)              | 155                       | 42              | 77.8                      |
| Hancock, KY      | 89              | (71,113)               | 123             | 1.38              | 34            | (10,52)              | 390                       | 5               | 14.7                      |
| Hardin, KY       | 1057            | (991,1137)             | 1202            | 1.14              | 145           | (65,211)             | 126                       | 98              | 67.6                      |
| Harlan, KY       | 444             | (413,507)              | 559             | 1.26              | 115           | (52,146)             | 446                       | 36              | 31.3                      |
| Harrison, KY     | 237             | (204,274)              | 254             | 1.07              | 17            | (-20,50)             | 90                        | 11              | 64.7                      |
| Hart, KY         | 241             | (206,274)              | 264             | 1.10              | 23            | (-10,58)             | 120                       | 36              | 156.5                     |
| Henderson, KY    | 542             | (497,595)              | 628             | 1.16              | 86            | (33,131)             | 192                       | 65              | 75.6                      |

Table C1: Primary Estimates for Each County

| County         | Expected Deaths | Expected Deaths 95% CI | Observed Deaths | Observed/Expected | Excess Deaths | Excess Deaths 95% CI | Excess Deaths Per 100,000 | COVID-19 Deaths | COVID-19 Excess Ratio (%) |
|----------------|-----------------|------------------------|-----------------|-------------------|---------------|----------------------|---------------------------|-----------------|---------------------------|
| Henry, KY      | 201             | (170,234)              | 194             | 0.97              | -7            | (-40,24)             | -43                       | 10              | NA                        |
| Hickman, KY    | 72              | (59,96)                | 93              | 1.29              | 21            | (-3,34)              | 497                       | 10              | 47.6                      |
| Hopkins, KY    | 622             | (558,668)              | 715             | 1.15              | 93            | (47,157)             | 209                       | 103             | 110.8                     |
| Jackson, KY    | 178             | (150,212)              | 213             | 1.20              | 35            | (1,63)               | 260                       | 23              | 65.7                      |
| Jefferson, KY  | 8415            | (8214,8678)            | 9561            | 1.14              | 1146          | (883,1347)           | 149                       | 838             | 73.1                      |
| Jessamine, KY  | 544             | (493,597)              | 549             | 1.01              | 5             | (-48,56)             | 9                         | 53              | 1060.0                    |
| Johnson, KY    | 342             | (305,391)              | 350             | 1.02              | 8             | (-41,45)             | 36                        | 24              | 300.0                     |
| Kenton, KY     | 1622            | (1526,1706)            | 1642            | 1.01              | 20            | (-64,116)            | 12                        | 119             | 595.0                     |
| Knott, KY      | 203             | (174,238)              | 231             | 1.14              | 28            | (-7,57)              | 189                       | 11              | 39.3                      |
| Knox, KY       | 436             | (396,489)              | 484             | 1.11              | 48            | (-5,88)              | 155                       | 36              | 75.0                      |
| Larue, KY      | 183             | (160,218)              | 191             | 1.04              | 8             | (-27,31)             | 55                        | 10              | 125.0                     |
| Laurel, KY     | 720             | (673,792)              | 838             | 1.16              | 118           | (46,165)             | 192                       | 31              | 26.3                      |
| Lawrence, KY   | 228             | (201,267)              | 214             | 0.94              | -14           | (-53,13)             | -92                       | 14              | NA                        |
| Lee, KY        | 114             | (99,146)               | 145             | 1.27              | 31            | (-1,46)              | 452                       | 17              | 54.8                      |
| Leslie, KY     | 168             | (153,213)              | 159             | 0.95              | -9            | (-54,6)              | -92                       | 5               | NA                        |
| Letcher, KY    | 348             | (327,411)              | 373             | 1.07              | 25            | (-38,46)             | 119                       | 25              | 100.0                     |
| Lewis, KY      | 209             | (181,247)              | 217             | 1.04              | 8             | (-30,36)             | 61                        | 32              | 400.0                     |
| Lincoln, KY    | 336             | (303,379)              | 377             | 1.12              | 41            | (-2,74)              | 164                       | 39              | 95.1                      |
| Livingston, KY | 134             | (110,160)              | 180             | 1.34              | 46            | (20,70)              | 500                       | 21              | 45.7                      |
| Logan, KY      | 346             | (309,391)              | 368             | 1.06              | 22            | (-23,59)             | 82                        | 43              | 195.5                     |
| Lyon, KY       | 126             | (99,148)               | 134             | 1.06              | 8             | (-14,35)             | 101                       | 16              | 200.0                     |
| McCracken, KY  | 813             | (749,870)              | 917             | 1.13              | 104           | (47,168)             | 159                       | 82              | 78.8                      |
| McCreary, KY   | 256             | (227,296)              | 237             | 0.93              | -19           | (-59,10)             | -109                      | 11              | NA                        |
| McLean, KY     | 127             | (103,152)              | 146             | 1.15              | 19            | (-6,43)              | 204                       | 16              | 84.2                      |
| Madison, KY    | 887             | (823,959)              | 992             | 1.12              | 105           | (33,169)             | 111                       | 70              | 66.7                      |
| Magoffin, KY   | 181             | (156,218)              | 179             | 0.99              | -2            | (-39,23)             | -17                       | 12              | NA                        |
| Marion, KY     | 235             | (209,274)              | 255             | 1.09              | 20            | (-19,46)             | 102                       | 28              | 140.0                     |
| Marshall, KY   | 467             | (430,526)              | 461             | 0.99              | -6            | (-65,31)             | -19                       | 38              | NA                        |
| Martin, KY     | 144             | (119,171)              | 161             | 1.12              | 17            | (-10,42)             | 154                       | 5               | 29.4                      |
| Mason, KY      | 252             | (228,300)              | 241             | 0.96              | -11           | (-59,13)             | -65                       | 24              | NA                        |
| Meade, KY      | 326             | (287,366)              | 299             | 0.92              | -27           | (-67,12)             | -90                       | 15              | NA                        |
| Menifee, KY    | 102             | (76,119)               | 97              | 0.95              | -5            | (-22,21)             | -78                       | 5               | NA                        |
| Mercer, KY     | 319             | (279,364)              | 313             | 0.98              | -6            | (-51,34)             | -27                       | 28              | NA                        |
| Metcalfe, KY   | 135             | (114,165)              | 178             | 1.32              | 43            | (13,64)              | 433                       | 18              | 41.9                      |
| Monroe, KY     | 158             | (126,182)              | 173             | 1.09              | 15            | (-9,47)              | 137                       | 38              | 253.3                     |
| Montgomery, KY | 355             | (314,398)              | 358             | 1.01              | 3             | (-40,44)             | 10                        | 20              | 666.7                     |
| Morgan, KY     | 156             | (129,182)              | 165             | 1.06              | 9             | (-17,36)             | 68                        | 5               | 55.6                      |
| Muhlenberg, KY | 403             | (361,455)              | 431             | 1.07              | 28            | (-24,70)             | 92                        | 43              | 153.6                     |
| Nelson, KY     | 496             | (455,556)              | 516             | 1.04              | 20            | (-40,61)             | 43                        | 39              | 195.0                     |
| Nicholas, KY   | 96              | (73,114)               | 93              | 0.97              | -3            | (-21,20)             | -42                       | 5               | NA                        |
| Ohio, KY       | 306             | (266,344)              | 307             | 1.00              | 1             | (-37,41)             | 4                         | 29              | 2900.0                    |
| Oldham, KY     | 478             | (431,529)              | 498             | 1.04              | 20            | (-31,67)             | 30                        | 60              | 300.0                     |
| Owen, KY       | 129             | (106,155)              | 159             | 1.23              | 30            | (4,53)               | 271                       | 11              | 36.7                      |
| Owsley, KY     | 74              | (56,95)                | 106             | 1.43              | 32            | (11,50)              | 698                       | 12              | 37.5                      |
| Pendleton, KY  | 173             | (148,207)              | 194             | 1.12              | 21            | (-13,46)             | 145                       | 5               | 23.8                      |
| Perry, KY      | 443             | (422,515)              | 523             | 1.18              | 80            | (8,101)              | 316                       | 38              | 47.5                      |
| Pike, KY       | 837             | (788,913)              | 969             | 1.16              | 132           | (56,181)             | 230                       | 49              | 37.1                      |
| Powell, KY     | 202             | (173,236)              | 191             | 0.95              | -11           | (-45,18)             | -87                       | 5               | NA                        |
| Pulaski, KY    | 886             | (818,952)              | 969             | 1.09              | 83            | (17,151)             | 127                       | 75              | 90.4                      |
| Robertson, KY  | 33              | (19,45)                | 46              | 1.39              | 13            | (1,27)               | 607                       | 5               | 38.5                      |
| Rockcastle, KY | 212             | (190,250)              | 221             | 1.04              | 9             | (-29,31)             | 54                        | 16              | 177.8                     |
| Rowan, KY      | 243             | (205,277)              | 268             | 1.10              | 25            | (-9,63)              | 100                       | 11              | 44.0                      |
| Russell, KY    | 269             | (240,310)              | 300             | 1.12              | 31            | (-10,60)             | 172                       | 37              | 119.4                     |
| Scott, KY      | 498             | (449,546)              | 487             | 0.98              | -11           | (-59,38)             | -19                       | 25              | NA                        |
| Shelby, KY     | 432             | (388,482)              | 488             | 1.13              | 56            | (6,100)              | 111                       | 50              | 89.3                      |
| Simpson, KY    | 240             | (217,288)              | 259             | 1.08              | 19            | (-29,42)             | 98                        | 25              | 131.6                     |
| Spencer, KY    | 163             | (134,191)              | 186             | 1.14              | 23            | (-5,52)              | 118                       | 16              | 69.6                      |
| Taylor, KY     | 328             | (295,377)              | 375             | 1.14              | 47            | (-2,80)              | 183                       | 34              | 72.3                      |
| Todd, KY       | 153             | (127,184)              | 144             | 0.94              | -9            | (-40,17)             | -72                       | 15              | NA                        |
| Trigg, KY      | 181             | (152,215)              | 224             | 1.24              | 43            | (9,72)               | 285                       | 11              | 25.6                      |
| Trimble, KY    | 117             | (94,138)               | 115             | 0.98              | -2            | (-23,21)             | -24                       | 11              | NA                        |
| Union, KY      | 189             | (156,215)              | 173             | 0.92              | -16           | (-42,17)             | -112                      | 13              | NA                        |
| Warren, KY     | 1111            | (1039,1186)            | 1290            | 1.16              | 179           | (104,251)            | 132                       | 108             | 60.3                      |
| Washington, KY | 149             | (123,175)              | 173             | 1.16              | 24            | (-2,50)              | 194                       | 28              | 116.7                     |



Table C1: Primary Estimates for Each County

| County                   | Expected Deaths | Expected Deaths 95% CI | Observed Deaths | Observed/Expected | Excess Deaths | Excess Deaths 95% CI | Excess Deaths Per 100,000 | COVID-19 Deaths | COVID-19 Excess Ratio (%) |
|--------------------------|-----------------|------------------------|-----------------|-------------------|---------------|----------------------|---------------------------|-----------------|---------------------------|
| Wayne, KY                | 251             | (218,292)              | 300             | 1.20              | 49            | (8,82)               | 243                       | 27              | 55.1                      |
| Webster, KY              | 171             | (138,195)              | 207             | 1.21              | 36            | (12,69)              | 273                       | 25              | 69.4                      |
| Whitley, KY              | 537             | (473,576)              | 553             | 1.03              | 16            | (-23,80)             | 44                        | 35              | 218.8                     |
| Wolfe, KY                | 111             | (92,139)               | 123             | 1.11              | 12            | (-16,31)             | 170                       | 5               | 41.7                      |
| Woodford, KY             | 267             | (236,304)              | 281             | 1.05              | 14            | (-23,45)             | 52                        | 5               | 35.7                      |
| Acadia, LA               | 652             | (606,720)              | 896             | 1.37              | 244           | (176,290)            | 396                       | 136             | 55.7                      |
| Allen, LA                | 283             | (251,328)              | 369             | 1.30              | 86            | (41,118)             | 337                       | 57              | 66.3                      |
| Ascension, LA            | 797             | (737,863)              | 997             | 1.25              | 200           | (134,260)            | 156                       | 125             | 62.5                      |
| Assumption, LA           | 227             | (197,261)              | 258             | 1.14              | 31            | (-3,61)              | 143                       | 27              | 87.1                      |
| Avoyelles, LA            | 485             | (445,544)              | 607             | 1.25              | 122           | (63,162)             | 308                       | 74              | 60.7                      |
| Beauregard, LA           | 428             | (385,480)              | 485             | 1.13              | 57            | (5,100)              | 150                       | 57              | 100.0                     |
| Bienville, LA            | 179             | (155,211)              | 261             | 1.46              | 82            | (50,106)             | 647                       | 50              | 61.0                      |
| Bossier, LA              | 1151            | (1084,1232)            | 1325            | 1.15              | 174           | (93,241)             | 136                       | 191             | 109.8                     |
| Caddo, LA                | 2788            | (2678,2934)            | 3560            | 1.28              | 772           | (626,882)            | 326                       | 501             | 64.9                      |
| Calcasieu, LA            | 2163            | (2060,2268)            | 2615            | 1.21              | 452           | (347,555)            | 221                       | 273             | 60.4                      |
| Caldwell, LA             | 128             | (104,154)              | 150             | 1.17              | 22            | (-4,46)              | 220                       | 23              | 104.5                     |
| Cameron, LA              | 57              | (42,75)                | 67              | 1.18              | 10            | (-8,25)              | 142                       | 5               | 50.0                      |
| Catahoula, LA            | 119             | (89,134)               | 162             | 1.36              | 43            | (28,73)              | 468                       | 25              | 58.1                      |
| Claiborne, LA            | 195             | (168,228)              | 237             | 1.22              | 42            | (9,69)               | 265                       | 47              | 111.9                     |
| Concordia, LA            | 259             | (222,292)              | 305             | 1.18              | 46            | (13,83)              | 242                       | 47              | 102.2                     |
| De Soto, LA              | 321             | (285,362)              | 357             | 1.11              | 36            | (-5,72)              | 130                       | 54              | 150.0                     |
| East Baton Rouge, LA     | 4010            | (3890,4171)            | 4867            | 1.21              | 857           | (696,977)            | 197                       | 537             | 62.7                      |
| East Carroll, LA         | 94              | (73,117)               | 100             | 1.06              | 6             | (-17,27)             | 88                        | 21              | 350.0                     |
| East Feliciana, LA       | 267             | (243,316)              | 317             | 1.19              | 50            | (1,74)               | 262                       | 70              | 140.0                     |
| Evangeline, LA           | 394             | (355,441)              | 502             | 1.27              | 108           | (61,147)             | 326                       | 57              | 52.8                      |
| Franklin, LA             | 271             | (229,298)              | 338             | 1.25              | 67            | (40,109)             | 336                       | 61              | 91.0                      |
| Grant, LA                | 235             | (202,270)              | 283             | 1.20              | 48            | (13,81)              | 211                       | 39              | 81.2                      |
| Iberia, LA               | 764             | (712,830)              | 932             | 1.22              | 168           | (102,220)            | 244                       | 90              | 53.6                      |
| Iberville, LA            | 358             | (316,398)              | 461             | 1.29              | 103           | (63,145)             | 319                       | 71              | 68.9                      |
| Jackson, LA              | 203             | (171,234)              | 238             | 1.17              | 35            | (4,67)               | 220                       | 23              | 65.7                      |
| Jefferson, LA            | 4349            | (4249,4567)            | 5236            | 1.20              | 887           | (669,987)            | 207                       | 647             | 72.9                      |
| Jefferson Davis, LA      | 418             | (386,473)              | 453             | 1.08              | 35            | (-20,67)             | 110                       | 59              | 168.6                     |
| Lafayette, LA            | 1855            | (1760,1959)            | 2274            | 1.23              | 419           | (315,514)            | 171                       | 176             | 42.0                      |
| Lafourche, LA            | 941             | (882,1015)             | 1102            | 1.17              | 161           | (87,220)             | 164                       | 152             | 94.4                      |
| LaSalle, LA              | 167             | (137,196)              | 214             | 1.28              | 47            | (18,77)              | 316                       | 25              | 53.2                      |
| Lincoln, LA              | 414             | (376,463)              | 512             | 1.24              | 98            | (49,136)             | 210                       | 72              | 73.5                      |
| Livingston, LA           | 1166            | (1087,1234)            | 1334            | 1.14              | 168           | (100,247)            | 118                       | 121             | 72.0                      |
| Madison, LA              | 132             | (111,163)              | 139             | 1.05              | 7             | (-24,28)             | 65                        | 20              | 285.7                     |
| Morehouse, LA            | 376             | (343,427)              | 487             | 1.30              | 111           | (60,144)             | 447                       | 46              | 41.4                      |
| Natchitoches, LA         | 416             | (376,468)              | 510             | 1.23              | 94            | (42,134)             | 248                       | 60              | 63.8                      |
| Orleans, LA              | 3421            | (3325,3586)            | 4367            | 1.28              | 946           | (781,1042)           | 243                       | 578             | 61.1                      |
| Ouachita, LA             | 1650            | (1586,1768)            | 2014            | 1.22              | 364           | (246,428)            | 240                       | 303             | 83.2                      |
| Plaquemines, LA          | 190             | (164,224)              | 237             | 1.25              | 47            | (13,73)              | 200                       | 22              | 46.8                      |
| Pointe Coupee, LA        | 271             | (239,317)              | 326             | 1.20              | 55            | (9,87)               | 257                       | 54              | 98.2                      |
| Rapides, LA              | 1558            | (1489,1672)            | 1887            | 1.21              | 329           | (215,398)            | 255                       | 223             | 67.8                      |
| Red River, LA            | 114             | (88,134)               | 153             | 1.34              | 39            | (19,65)              | 465                       | 29              | 74.4                      |
| Richland, LA             | 231             | (199,262)              | 297             | 1.29              | 66            | (35,98)              | 334                       | 46              | 69.7                      |
| Sabine, LA               | 287             | (252,323)              | 380             | 1.32              | 93            | (57,128)             | 386                       | 49              | 52.7                      |
| St. Bernard, LA          | 396             | (351,441)              | 446             | 1.13              | 50            | (5,95)               | 104                       | 43              | 86.0                      |
| St. Charles, LA          | 455             | (418,512)              | 537             | 1.18              | 82            | (25,119)             | 154                       | 64              | 78.0                      |
| St. Helena, LA           | 129             | (108,157)              | 160             | 1.24              | 31            | (3,52)               | 309                       | 5               | 16.1                      |
| St. James, LA            | 215             | (188,251)              | 248             | 1.15              | 33            | (-3,60)              | 161                       | 44              | 133.3                     |
| St. John the Baptist, LA | 445             | (409,500)              | 515             | 1.16              | 70            | (15,106)             | 163                       | 100             | 142.9                     |
| St. Landry, LA           | 1063            | (1005,1157)            | 1257            | 1.18              | 194           | (100,252)            | 238                       | 192             | 99.0                      |
| St. Martin, LA           | 534             | (487,593)              | 677             | 1.27              | 143           | (84,190)             | 272                       | 93              | 65.0                      |
| St. Mary, LA             | 565             | (515,619)              | 689             | 1.22              | 124           | (70,174)             | 258                       | 95              | 76.6                      |
| St. Tammany, LA          | 2423            | (2338,2560)            | 2787            | 1.15              | 364           | (227,449)            | 139                       | 275             | 75.5                      |
| Tangipahoa, LA           | 1350            | (1284,1446)            | 1524            | 1.13              | 174           | (78,240)             | 127                       | 173             | 99.4                      |
| Tensas, LA               | 60              | (48,84)                | 80              | 1.33              | 20            | (-4,32)              | 472                       | 5               | 25.0                      |
| Terrebonne, LA           | 1075            | (1010,1155)            | 1258            | 1.17              | 183           | (103,248)            | 167                       | 128             | 69.9                      |
| Union, LA                | 295             | (261,342)              | 408             | 1.38              | 113           | (66,147)             | 512                       | 72              | 63.7                      |
| Vermilion, LA            | 598             | (547,659)              | 727             | 1.22              | 129           | (68,180)             | 216                       | 74              | 57.4                      |
| Vernon, LA               | 444             | (407,501)              | 541             | 1.22              | 97            | (40,134)             | 211                       | 70              | 72.2                      |
| Washington, LA           | 648             | (598,717)              | 739             | 1.14              | 91            | (22,141)             | 196                       | 84              | 92.3                      |

Table C1: Primary Estimates for Each County

| County               | Expected Deaths | Expected Deaths 95% CI | Observed Deaths | Observed/Expected | Excess Deaths | Excess Deaths 95% CI | Excess Deaths Per 100,000 | COVID-19 Deaths | COVID-19 to Excess Ratio (%) |
|----------------------|-----------------|------------------------|-----------------|-------------------|---------------|----------------------|---------------------------|-----------------|------------------------------|
| Webster, LA          | 552             | (498,602)              | 674             | 1.22              | 122           | (72,176)             | 322                       | 80              | 65.6                         |
| West Baton Rouge, LA | 217             | (181,246)              | 293             | 1.35              | 76            | (47,112)             | 283                       | 46              | 60.5                         |
| West Carroll, LA     | 152             | (124,178)              | 173             | 1.14              | 21            | (-5,49)              | 191                       | 35              | 166.7                        |
| West Feliciana, LA   | 153             | (127,180)              | 168             | 1.10              | 15            | (-12,41)             | 96                        | 27              | 180.0                        |
| Winn, LA             | 186             | (160,225)              | 229             | 1.23              | 43            | (4,69)               | 313                       | 33              | 76.7                         |
| Androscoggin, ME     | 1274            | (1224,1381)            | 1264            | 0.99              | -10           | (-117,40)            | -9                        | 45              | NA                           |
| Aroostook, ME        | 890             | (821,953)              | 963             | 1.08              | 73            | (10,142)             | 110                       | 24              | 32.9                         |
| Cumberland, ME       | 2871            | (2756,3000)            | 2960            | 1.03              | 89            | (-40,204)            | 30                        | 112             | 125.8                        |
| Franklin, ME         | 387             | (345,437)              | 339             | 0.88              | -48           | (-98,-6)             | -160                      | 10              | NA                           |
| Hancock, ME          | 674             | (620,734)              | 684             | 1.01              | 10            | (-50,64)             | 18                        | 27              | 270.0                        |
| Kennebec, ME         | 1406            | (1316,1479)            | 1459            | 1.04              | 53            | (-20,143)            | 43                        | 36              | 67.9                         |
| Knox, ME             | 542             | (485,588)              | 485             | 0.89              | -57           | (-103,0)             | -144                      | 5               | NA                           |
| Lincoln, ME          | 431             | (387,477)              | 468             | 1.09              | 37            | (-9,81)              | 107                       | 5               | 13.5                         |
| Oxford, ME           | 721             | (673,788)              | 723             | 1.00              | 2             | (-65,50)             | 3                         | 34              | 1700.0                       |
| Penobscot, ME        | 1781            | (1705,1884)            | 1843            | 1.03              | 62            | (-41,138)            | 41                        | 37              | 59.7                         |
| Piscataquis, ME      | 267             | (233,307)              | 247             | 0.93              | -20           | (-60,14)             | -119                      | 5               | NA                           |
| Sagadahoc, ME        | 393             | (342,432)              | 375             | 0.95              | -18           | (-57,33)             | -50                       | 5               | NA                           |
| Somerset, ME         | 673             | (623,738)              | 663             | 0.99              | -10           | (-75,40)             | -20                       | 20              | NA                           |
| Waldo, ME            | 451             | (412,508)              | 458             | 1.02              | 7             | (-50,46)             | 18                        | 22              | 314.3                        |
| Washington, ME       | 451             | (401,494)              | 528             | 1.17              | 77            | (34,127)             | 245                       | 5               | 6.5                          |
| York, ME             | 2308            | (2218,2441)            | 2282            | 0.99              | -26           | (-159,64)            | -12                       | 93              | NA                           |
| Allegany, MD         | 922             | (847,984)              | 1165            | 1.26              | 243           | (181,318)            | 346                       | 173             | 71.2                         |
| Anne Arundel, MD     | 4708            | (4578,4909)            | 5026            | 1.07              | 318           | (117,448)            | 54                        | 398             | 125.2                        |
| Baltimore, MD        | 8811            | (8632,9101)            | 9901            | 1.12              | 1090          | (800,1269)           | 132                       | 1024            | 93.9                         |
| Calvert, MD          | 756             | (704,832)              | 825             | 1.09              | 69            | (-7,121)             | 74                        | 55              | 79.7                         |
| Caroline, MD         | 359             | (313,396)              | 412             | 1.15              | 53            | (16,99)              | 157                       | 16              | 30.2                         |
| Carroll, MD          | 1761            | (1685,1873)            | 1846            | 1.05              | 85            | (-27,161)            | 50                        | 196             | 230.6                        |
| Cecil, MD            | 1095            | (1046,1192)            | 1219            | 1.11              | 124           | (27,173)             | 120                       | 100             | 80.6                         |
| Charles, MD          | 1226            | (1166,1323)            | 1435            | 1.17              | 209           | (112,269)            | 126                       | 165             | 78.9                         |
| Dorchester, MD       | 437             | (394,489)              | 444             | 1.02              | 7             | (-45,50)             | 22                        | 34              | 485.7                        |
| Frederick, MD        | 2070            | (1981,2175)            | 2214            | 1.07              | 144           | (39,233)             | 54                        | 207             | 143.8                        |
| Garrett, MD          | 366             | (331,414)              | 441             | 1.20              | 75            | (27,110)             | 259                       | 58              | 77.3                         |
| Harford, MD          | 2374            | (2281,2488)            | 2581            | 1.09              | 207           | (93,300)             | 80                        | 178             | 86.0                         |
| Howard, MD           | 1878            | (1794,1984)            | 2079            | 1.11              | 201           | (95,285)             | 61                        | 210             | 104.5                        |
| Kent, MD             | 282             | (246,322)              | 324             | 1.15              | 42            | (2,78)               | 218                       | 37              | 88.1                         |
| Montgomery, MD       | 6639            | (6453,6822)            | 7709            | 1.16              | 1070          | (887,1256)           | 101                       | 1213            | 113.4                        |
| Prince George's, MD  | 6447            | (6351,6716)            | 8374            | 1.30              | 1927          | (1658,2023)          | 212                       | 1355            | 70.3                         |
| Queen Anne's, MD     | 476             | (439,533)              | 460             | 0.97              | -16           | (-73,21)             | -31                       | 29              | NA                           |
| St. Mary's, MD       | 902             | (842,976)              | 1008            | 1.12              | 106           | (32,166)             | 94                        | 97              | 91.5                         |
| Somerset, MD         | 286             | (256,328)              | 351             | 1.23              | 65            | (23,95)              | 258                       | 22              | 33.8                         |
| Talbot, MD           | 475             | (437,535)              | 550             | 1.16              | 75            | (15,113)             | 204                       | 10              | 13.3                         |
| Washington, MD       | 1730            | (1654,1853)            | 1969            | 1.14              | 239           | (116,315)            | 157                       | 200             | 83.7                         |
| Wicomico, MD         | 1092            | (1039,1192)            | 1201            | 1.10              | 109           | (9,162)              | 104                       | 90              | 82.6                         |
| Worcester, MD        | 671             | (611,730)              | 742             | 1.11              | 71            | (12,131)             | 136                       | 56              | 78.9                         |
| Baltimore city, MD   | 6646            | (6527,6935)            | 7797            | 1.17              | 1151          | (862,1270)           | 196                       | 783             | 68.0                         |
| Barnstable, MA       | 3111            | (2977,3251)            | 3137            | 1.01              | 26            | (-114,160)           | 12                        | 213             | 819.2                        |
| Berkshire, MA        | 1648            | (1574,1754)            | 1676            | 1.02              | 28            | (-78,102)            | 22                        | 127             | 453.6                        |
| Bristol, MA          | 5754            | (5583,5941)            | 6433            | 1.12              | 679           | (492,850)            | 119                       | 868             | 127.8                        |
| Dukes, MA            | 157             | (128,184)              | 169             | 1.08              | 12            | (-15,41)             | 69                        | 5               | 41.7                         |
| Essex, MA            | 7421            | (7226,7655)            | 8356            | 1.13              | 935           | (701,1130)           | 117                       | 1354            | 144.8                        |
| Franklin, MA         | 759             | (693,817)              | 839             | 1.11              | 80            | (22,146)             | 112                       | 78              | 97.5                         |
| Hampden, MA          | 4871            | (4719,5063)            | 5684            | 1.17              | 813           | (621,965)            | 172                       | 832             | 102.3                        |
| Hampshire, MA        | 1363            | (1293,1457)            | 1493            | 1.10              | 130           | (36,200)             | 81                        | 167             | 128.5                        |
| Middlesex, MA        | 11967           | (11683,12237)          | 13664           | 1.14              | 1697          | (1427,1981)          | 104                       | 2274            | 134.0                        |
| Nantucket, MA        | 74              | (55,92)                | 77              | 1.04              | 3             | (-15,22)             | 26                        | 5               | 166.7                        |
| Norfolk, MA          | 6101            | (5897,6291)            | 6816            | 1.12              | 715           | (525,919)            | 100                       | 1000            | 139.9                        |
| Plymouth, MA         | 5072            | (4923,5257)            | 5685            | 1.12              | 613           | (428,762)            | 117                       | 787             | 128.4                        |
| Suffolk, MA          | 4832            | (4652,4972)            | 5924            | 1.23              | 1092          | (952,1272)           | 134                       | 1172            | 107.3                        |
| Worcester, MA        | 7739            | (7513,7948)            | 8260            | 1.07              | 521           | (312,747)            | 62                        | 1221            | 234.4                        |
| Alcona, MI           | 184             | (153,210)              | 204             | 1.11              | 20            | (-6,51)              | 192                       | 20              | 100.0                        |
| Alger, MI            | 117             | (92,138)               | 98              | 0.84              | -19           | (-40,6)              | -211                      | 5               | NA                           |
| Allegan, MI          | 1094            | (1027,1170)            | 1259            | 1.15              | 165           | (89,232)             | 139                       | 81              | 49.1                         |
| Alpena, MI           | 398             | (348,435)              | 410             | 1.03              | 12            | (-25,62)             | 43                        | 25              | 208.3                        |
| Antrim, MI           | 284             | (244,316)              | 307             | 1.08              | 23            | (-9,63)              | 98                        | 10              | 43.5                         |

Table C1: Primary Estimates for Each County

| County             | Expected Deaths | Expected Deaths 95% CI | Observed Deaths | Observed/Expected | Excess Deaths | Excess Deaths 95% CI | Excess Deaths Per 100,000 | COVID-19 Deaths | COVID-19 to Excess Ratio (%) |
|--------------------|-----------------|------------------------|-----------------|-------------------|---------------|----------------------|---------------------------|-----------------|------------------------------|
| Arenac, MI         | 211             | (182,248)              | 246             | 1.17              | 35            | (-2,64)              | 233                       | 16              | 45.7                         |
| Baraga, MI         | 110             | (94,140)               | 125             | 1.14              | 15            | (-15,31)             | 186                       | 27              | 180.0                        |
| Barry, MI          | 604             | (546,656)              | 634             | 1.05              | 30            | (-22,88)             | 48                        | 42              | 140.0                        |
| Bay, MI            | 1357            | (1302,1474)            | 1536            | 1.13              | 179           | (62,234)             | 173                       | 173             | 96.6                         |
| Benzie, MI         | 208             | (178,244)              | 267             | 1.28              | 59            | (23,89)              | 327                       | 25              | 42.4                         |
| Berrien, MI        | 1841            | (1733,1923)            | 1918            | 1.04              | 77            | (-5,185)             | 50                        | 195             | 253.2                        |
| Branch, MI         | 498             | (449,553)              | 546             | 1.10              | 48            | (-7,97)              | 109                       | 78              | 162.5                        |
| Calhoun, MI        | 1641            | (1561,1735)            | 1919            | 1.17              | 278           | (184,358)            | 207                       | 178             | 64.0                         |
| Cass, MI           | 565             | (509,615)              | 669             | 1.18              | 104           | (54,160)             | 200                       | 68              | 65.4                         |
| Charlevoix, MI     | 306             | (273,352)              | 286             | 0.93              | -20           | (-66,13)             | -76                       | 13              | NA                           |
| Cheboygan, MI      | 352             | (321,403)              | 397             | 1.13              | 45            | (-6,76)              | 177                       | 42              | 93.3                         |
| Chippewa, MI       | 389             | (350,438)              | 376             | 0.97              | -13           | (-62,26)             | -35                       | 22              | NA                           |
| Clare, MI          | 497             | (458,561)              | 509             | 1.02              | 12            | (-52,51)             | 39                        | 45              | 375.0                        |
| Clinton, MI        | 659             | (605,719)              | 739             | 1.12              | 80            | (20,134)             | 99                        | 52              | 65.0                         |
| Crawford, MI       | 205             | (183,248)              | 182             | 0.89              | -23           | (-66,-1)             | -166                      | 5               | NA                           |
| Delta, MI          | 484             | (447,552)              | 596             | 1.23              | 112           | (44,149)             | 313                       | 68              | 60.7                         |
| Dickinson, MI      | 306             | (264,343)              | 402             | 1.31              | 96            | (59,138)             | 380                       | 73              | 76.0                         |
| Eaton, MI          | 1108            | (1045,1194)            | 1241            | 1.12              | 133           | (47,196)             | 121                       | 83              | 62.4                         |
| Emmet, MI          | 402             | (365,457)              | 436             | 1.08              | 34            | (-21,71)             | 101                       | 33              | 97.1                         |
| Genesee, MI        | 4967            | (4848,5196)            | 5525            | 1.11              | 558           | (329,677)            | 138                       | 528             | 94.6                         |
| Gladwin, MI        | 398             | (356,447)              | 451             | 1.13              | 53            | (4,95)               | 208                       | 38              | 71.7                         |
| Gogebic, MI        | 189             | (167,228)              | 251             | 1.33              | 62            | (23,84)              | 415                       | 49              | 79.0                         |
| Grand Traverse, MI | 957             | (896,1026)             | 1050            | 1.10              | 93            | (24,154)             | 99                        | 45              | 48.4                         |
| Gratiot, MI        | 497             | (451,551)              | 563             | 1.13              | 66            | (12,112)             | 165                       | 57              | 86.4                         |
| Hillsdale, MI      | 537             | (501,607)              | 637             | 1.19              | 100           | (30,136)             | 219                       | 68              | 68.0                         |
| Houghton, MI       | 367             | (329,414)              | 406             | 1.11              | 39            | (-8,77)              | 109                       | 29              | 74.4                         |
| Huron, MI          | 480             | (419,522)              | 500             | 1.04              | 20            | (-22,81)             | 65                        | 50              | 250.0                        |
| Ingham, MI         | 2333            | (2233,2463)            | 2669            | 1.14              | 336           | (206,436)            | 114                       | 175             | 52.1                         |
| Ionia, MI          | 578             | (532,637)              | 610             | 1.06              | 32            | (-27,78)             | 50                        | 40              | 125.0                        |
| Iosco, MI          | 428             | (383,473)              | 470             | 1.10              | 42            | (-3,87)              | 168                       | 46              | 109.5                        |
| Iron, MI           | 197             | (173,236)              | 250             | 1.27              | 53            | (14,77)              | 477                       | 29              | 54.7                         |
| Isabella, MI       | 524             | (474,575)              | 626             | 1.19              | 102           | (51,152)             | 145                       | 34              | 33.3                         |
| Jackson, MI        | 1859            | (1778,1973)            | 2005            | 1.08              | 146           | (32,227)             | 92                        | 198             | 135.6                        |
| Kalamazoo, MI      | 2301            | (2196,2423)            | 2558            | 1.11              | 257           | (135,362)            | 96                        | 212             | 82.5                         |
| Kalkaska, MI       | 227             | (201,265)              | 246             | 1.08              | 19            | (-19,45)             | 104                       | 15              | 78.9                         |
| Kent, MI           | 5103            | (4944,5296)            | 5706            | 1.12              | 603           | (410,762)            | 91                        | 511             | 84.7                         |
| Keweenaw, MI       | 30              | (19,45)                | 28              | 0.93              | -2            | (-17,9)              | -94                       | 5               | NA                           |
| Lake, MI           | 186             | (155,213)              | 210             | 1.13              | 24            | (-3,55)              | 197                       | 11              | 45.8                         |
| Lapeer, MI         | 984             | (937,1077)             | 1037            | 1.05              | 53            | (-40,100)            | 60                        | 101             | 190.6                        |
| Leelanau, MI       | 272             | (238,309)              | 287             | 1.06              | 15            | (-22,49)             | 68                        | 11              | 73.3                         |
| Lenawee, MI        | 1126            | (1053,1208)            | 1241            | 1.10              | 115           | (33,188)             | 117                       | 83              | 72.2                         |
| Livingston, MI     | 1559            | (1484,1658)            | 1774            | 1.14              | 215           | (116,290)            | 111                       | 90              | 41.9                         |
| Luce, MI           | 78              | (62,101)               | 72              | 0.92              | -6            | (-29,10)             | -97                       | 0               | 0.0                          |
| Mackinac, MI       | 170             | (148,202)              | 164             | 0.96              | -6            | (-38,16)             | -55                       | 5               | NA                           |
| Macomb, MI         | 9194            | (9007,9482)            | 10877           | 1.18              | 1683          | (1395,1870)          | 191                       | 1491            | 88.6                         |
| Manistee, MI       | 340             | (300,382)              | 407             | 1.20              | 67            | (25,107)             | 272                       | 23              | 34.3                         |
| Marquette, MI      | 734             | (675,799)              | 723             | 0.99              | -11           | (-76,48)             | -17                       | 47              | NA                           |
| Mason, MI          | 348             | (311,395)              | 402             | 1.16              | 54            | (7,91)               | 185                       | 23              | 42.6                         |
| Mecosta, MI        | 430             | (391,481)              | 498             | 1.16              | 68            | (17,107)             | 155                       | 18              | 26.5                         |
| Menominee, MI      | 309             | (278,358)              | 308             | 1.00              | -1            | (-50,30)             | -4                        | 25              | NA                           |
| Midland, MI        | 789             | (733,858)              | 911             | 1.15              | 122           | (53,178)             | 147                       | 48              | 39.3                         |
| Missaukee, MI      | 178             | (150,212)              | 198             | 1.11              | 20            | (-14,48)             | 131                       | 5               | 25.0                         |
| Monroe, MI         | 1625            | (1546,1731)            | 1793            | 1.10              | 168           | (62,247)             | 110                       | 141             | 83.9                         |
| Montcalm, MI       | 684             | (641,763)              | 734             | 1.07              | 50            | (-29,93)             | 78                        | 79              | 158.0                        |
| Montmorency, MI    | 171             | (145,203)              | 195             | 1.14              | 24            | (-8,50)              | 257                       | 16              | 66.7                         |
| Muskegon, MI       | 1836            | (1742,1944)            | 2196            | 1.20              | 360           | (252,454)            | 206                       | 279             | 77.5                         |
| Newaygo, MI        | 545             | (495,593)              | 580             | 1.06              | 35            | (-13,85)             | 70                        | 35              | 100.0                        |
| Oakland, MI        | 11028           | (10795,11313)          | 12930           | 1.17              | 1902          | (1617,2135)          | 150                       | 1539            | 80.9                         |
| Oceana, MI         | 291             | (249,325)              | 330             | 1.13              | 39            | (5,81)               | 145                       | 43              | 110.3                        |
| Ogemaw, MI         | 368             | (328,414)              | 346             | 0.94              | -22           | (-68,18)             | -105                      | 30              | NA                           |
| Ontonagon, MI      | 105             | (83,128)               | 133             | 1.27              | 28            | (5,50)               | 497                       | 20              | 71.4                         |
| Osceola, MI        | 261             | (232,300)              | 277             | 1.06              | 16            | (-23,45)             | 68                        | 19              | 118.8                        |
| Oscoda, MI         | 135             | (111,165)              | 172             | 1.27              | 37            | (7,61)               | 446                       | 16              | 43.2                         |
| Otsego, MI         | 291             | (254,326)              | 326             | 1.12              | 35            | (0,72)               | 141                       | 20              | 57.1                         |

Table C1: Primary Estimates for Each County

| County                | Expected Deaths | Expected Deaths 95% CI | Observed Deaths | Observed/Expected | Excess Deaths | Excess Deaths 95% CI | Excess Deaths Per 100,000 | COVID-19 Deaths | COVID-19 Excess Ratio (%) |
|-----------------------|-----------------|------------------------|-----------------|-------------------|---------------|----------------------|---------------------------|-----------------|---------------------------|
| Ottawa, MI            | 2187            | (2107,2302)            | 2509            | 1.15              | 322           | (207,402)            | 108                       | 248             | 77.0                      |
| Presque Isle, MI      | 214             | (182,247)              | 205             | 0.96              | -9            | (-42,23)             | -71                       | 14              | NA                        |
| Roscommon, MI         | 429             | (383,472)              | 465             | 1.08              | 36            | (-7,82)              | 150                       | 32              | 88.9                      |
| Saginaw, MI           | 2260            | (2160,2375)            | 2707            | 1.20              | 447           | (332,547)            | 237                       | 372             | 83.2                      |
| St. Clair, MI         | 1899            | (1810,2007)            | 2104            | 1.11              | 205           | (97,294)             | 128                       | 172             | 83.9                      |
| St. Joseph, MI        | 714             | (656,777)              | 759             | 1.06              | 45            | (-18,103)            | 73                        | 64              | 142.2                     |
| Sanilac, MI           | 550             | (499,610)              | 569             | 1.03              | 19            | (-41,70)             | 46                        | 71              | 373.7                     |
| Schoolcraft, MI       | 123             | (103,152)              | 131             | 1.07              | 8             | (-21,28)             | 99                        | 5               | 62.5                      |
| Shiawassee, MI        | 791             | (741,867)              | 847             | 1.07              | 56            | (-20,106)            | 83                        | 58              | 103.6                     |
| Tuscola, MI           | 676             | (640,760)              | 775             | 1.15              | 99            | (15,135)             | 191                       | 100             | 101.0                     |
| Van Buren, MI         | 826             | (761,893)              | 914             | 1.11              | 88            | (21,153)             | 116                       | 93              | 105.7                     |
| Washtenaw, MI         | 2462            | (2382,2607)            | 2709            | 1.10              | 247           | (102,327)            | 66                        | 208             | 84.2                      |
| Wayne, MI             | 18720           | (18400,19165)          | 23033           | 1.23              | 4313          | (3868,4633)          | 247                       | 3281            | 76.1                      |
| Wexford, MI           | 368             | (322,406)              | 384             | 1.04              | 16            | (-22,62)             | 47                        | 12              | 75.0                      |
| Aitkin, MN            | 236             | (216,284)              | 270             | 1.14              | 34            | (-14,54)             | 211                       | 36              | 105.9                     |
| Anoka, MN             | 2433            | (2338,2572)            | 2754            | 1.13              | 321           | (182,416)            | 89                        | 380             | 118.4                     |
| Becker, MN            | 383             | (341,431)              | 444             | 1.16              | 61            | (13,103)             | 175                       | 46              | 75.4                      |
| Beltrami, MN          | 415             | (366,460)              | 546             | 1.32              | 131           | (86,180)             | 275                       | 49              | 37.4                      |
| Benton, MN            | 408             | (363,461)              | 488             | 1.20              | 80            | (27,125)             | 193                       | 82              | 102.5                     |
| Big Stone, MN         | 77              | (60,98)                | 79              | 1.03              | 2             | (-19,19)             | 40                        | 5               | 250.0                     |
| Blue Earth, MN        | 521             | (475,572)              | 536             | 1.03              | 15            | (-36,61)             | 22                        | 36              | 240.0                     |
| Brown, MN             | 297             | (265,346)              | 325             | 1.09              | 28            | (-21,60)             | 112                       | 32              | 114.3                     |
| Carlton, MN           | 397             | (348,438)              | 428             | 1.08              | 31            | (-10,80)             | 85                        | 44              | 141.9                     |
| Carver, MN            | 584             | (537,638)              | 616             | 1.05              | 32            | (-22,79)             | 30                        | 39              | 121.9                     |
| Cass, MN              | 356             | (318,402)              | 380             | 1.07              | 24            | (-22,62)             | 80                        | 26              | 108.3                     |
| Chippewa, MN          | 166             | (142,199)              | 178             | 1.07              | 12            | (-21,36)             | 101                       | 32              | 266.7                     |
| Chisago, MN           | 494             | (452,547)              | 504             | 1.02              | 10            | (-43,52)             | 17                        | 32              | 320.0                     |
| Clay, MN              | 500             | (453,549)              | 568             | 1.14              | 68            | (19,115)             | 105                       | 91              | 133.8                     |
| Clearwater, MN        | 99              | (79,122)               | 116             | 1.17              | 17            | (-6,37)              | 194                       | 11              | 64.7                      |
| Cook, MN              | 57              | (45,78)                | 57              | 1.00              | 0             | (-21,12)             | 0                         | 0               | NA                        |
| Cottonwood, MN        | 144             | (123,178)              | 178             | 1.24              | 34            | (0,55)               | 302                       | 19              | 55.9                      |
| Crow Wing, MN         | 749             | (700,820)              | 757             | 1.01              | 8             | (-63,57)             | 12                        | 77              | 962.5                     |
| Dakota, MN            | 2855            | (2763,3006)            | 3210            | 1.12              | 355           | (204,447)            | 82                        | 318             | 89.6                      |
| Dodge, MN             | 178             | (147,208)              | 158             | 0.89              | -20           | (-50,11)             | -95                       | 5               | NA                        |
| Douglas, MN           | 479             | (435,537)              | 519             | 1.08              | 40            | (-18,84)             | 103                       | 61              | 152.5                     |
| Faribault, MN         | 179             | (148,207)              | 198             | 1.11              | 19            | (-9,50)              | 138                       | 14              | 73.7                      |
| Fillmore, MN          | 241             | (207,273)              | 254             | 1.05              | 13            | (-19,47)             | 61                        | 10              | 76.9                      |
| Freeborn, MN          | 378             | (329,418)              | 402             | 1.06              | 24            | (-16,73)             | 79                        | 21              | 87.5                      |
| Goodhue, MN           | 499             | (456,558)              | 583             | 1.17              | 84            | (25,127)             | 181                       | 50              | 59.5                      |
| Grant, MN             | 70              | (51,87)                | 81              | 1.16              | 11            | (-6,30)              | 178                       | 5               | 45.5                      |
| Hennepin, MN          | 9202            | (8998,9451)            | 10686           | 1.16              | 1484          | (1235,1688)          | 116                       | 1477            | 99.5                      |
| Houston, MN           | 198             | (167,228)              | 223             | 1.13              | 25            | (-5,56)              | 136                       | 13              | 52.0                      |
| Hubbard, MN           | 244             | (216,285)              | 262             | 1.07              | 18            | (-23,46)             | 82                        | 44              | 244.4                     |
| Isanti, MN            | 359             | (322,404)              | 368             | 1.03              | 9             | (-36,46)             | 22                        | 38              | 422.2                     |
| Itasca, MN            | 531             | (472,573)              | 559             | 1.05              | 28            | (-14,87)             | 62                        | 40              | 142.9                     |
| Jackson, MN           | 107             | (88,133)               | 114             | 1.07              | 7             | (-19,26)             | 72                        | 13              | 185.7                     |
| Kanabec, MN           | 159             | (134,191)              | 208             | 1.31              | 49            | (17,74)              | 297                       | 24              | 49.0                      |
| Kandiyohi, MN         | 402             | (359,447)              | 473             | 1.18              | 71            | (26,114)             | 165                       | 72              | 101.4                     |
| Kittson, MN           | 64              | (46,84)                | 87              | 1.36              | 23            | (3,41)               | 545                       | 22              | 95.7                      |
| Koochiching, MN       | 152             | (127,183)              | 175             | 1.15              | 23            | (-8,48)              | 187                       | 11              | 47.8                      |
| Lac qui Parle, MN     | 84              | (64,102)               | 108             | 1.29              | 24            | (6,44)               | 364                       | 19              | 79.2                      |
| Lake, MN              | 158             | (124,181)              | 160             | 1.01              | 2             | (-21,36)             | 18                        | 14              | 700.0                     |
| Lake of the Woods, MN | 43              | (29,57)                | 53              | 1.23              | 10            | (-4,24)              | 264                       | 5               | 50.0                      |
| Le Sueur, MN          | 257             | (227,296)              | 253             | 0.98              | -4            | (-43,26)             | -14                       | 19              | NA                        |
| Lincoln, MN           | 85              | (68,108)               | 81              | 0.95              | -4            | (-27,13)             | -71                       | 5               | NA                        |
| Lyon, MN              | 229             | (194,262)              | 274             | 1.20              | 45            | (12,80)              | 178                       | 34              | 75.6                      |
| McLeod, MN            | 357             | (319,400)              | 443             | 1.24              | 86            | (43,124)             | 240                       | 46              | 53.5                      |
| Mahnomen, MN          | 73              | (56,93)                | 79              | 1.08              | 6             | (-14,23)             | 111                       | 5               | 83.3                      |
| Marshall, MN          | 88              | (69,111)               | 108             | 1.23              | 20            | (-3,39)              | 212                       | 16              | 80.0                      |
| Martin, MN            | 263             | (221,291)              | 254             | 0.97              | -9            | (-37,33)             | -46                       | 26              | NA                        |
| Meeker, MN            | 245             | (214,282)              | 272             | 1.11              | 27            | (-10,58)             | 116                       | 31              | 114.8                     |
| Mille Lacs, MN        | 321             | (286,363)              | 371             | 1.16              | 50            | (8,85)               | 188                       | 48              | 96.0                      |
| Morrison, MN          | 333             | (294,371)              | 393             | 1.18              | 60            | (22,99)              | 180                       | 48              | 80.0                      |
| Mower, MN             | 440             | (398,495)              | 419             | 0.95              | -21           | (-76,21)             | -52                       | 32              | NA                        |

Table C1: Primary Estimates for Each County

| County              | Expected Deaths | Expected Deaths 95% CI | Observed Deaths | Observed/Expected | Excess Deaths | Excess Deaths 95% CI | Excess Deaths Per 100,000 | COVID-19 Deaths | COVID-19 to Excess Ratio (%) |
|---------------------|-----------------|------------------------|-----------------|-------------------|---------------|----------------------|---------------------------|-----------------|------------------------------|
| Murray, MN          | 91              | (70,111)               | 70              | 0.77              | -21           | (-41,0)              | -259                      | 5               | NA                           |
| Nicollet, MN        | 287             | (259,330)              | 269             | 0.94              | -18           | (-61,10)             | -52                       | 34              | NA                           |
| Nobles, MN          | 193             | (165,230)              | 238             | 1.23              | 45            | (8,73)               | 203                       | 49              | 108.9                        |
| Norman, MN          | 107             | (83,127)               | 78              | 0.73              | -29           | (-49,-5)             | -464                      | 5               | NA                           |
| Olmsted, MN         | 1186            | (1119,1261)            | 1273            | 1.07              | 87            | (12,154)             | 54                        | 71              | 81.6                         |
| Otter Tail, MN      | 685             | (627,745)              | 798             | 1.16              | 113           | (53,171)             | 189                       | 59              | 52.2                         |
| Pennington, MN      | 132             | (109,160)              | 140             | 1.06              | 8             | (-20,31)             | 57                        | 15              | 187.5                        |
| Pine, MN            | 330             | (292,372)              | 353             | 1.07              | 23            | (-19,61)             | 77                        | 21              | 91.3                         |
| Pipestone, MN       | 126             | (102,149)              | 125             | 0.99              | -1            | (-24,23)             | -11                       | 19              | NA                           |
| Polk, MN            | 348             | (307,393)              | 421             | 1.21              | 73            | (28,114)             | 234                       | 62              | 84.9                         |
| Pope, MN            | 127             | (103,156)              | 131             | 1.03              | 4             | (-25,28)             | 35                        | 5               | 125.0                        |
| Ramsey, MN          | 4508            | (4356,4671)            | 5141            | 1.14              | 633           | (470,785)            | 113                       | 713             | 112.6                        |
| Red Lake, MN        | 29              | (18,41)                | 31              | 1.07              | 2             | (-10,13)             | 51                        | 5               | 250.0                        |
| Redwood, MN         | 183             | (155,216)              | 204             | 1.11              | 21            | (-12,49)             | 138                       | 29              | 138.1                        |
| Renville, MN        | 172             | (142,200)              | 194             | 1.13              | 22            | (-6,52)              | 152                       | 36              | 163.6                        |
| Rice, MN            | 548             | (506,610)              | 593             | 1.08              | 45            | (-17,87)             | 67                        | 57              | 126.7                        |
| Rock, MN            | 115             | (96,143)               | 147             | 1.28              | 32            | (4,51)               | 343                       | 13              | 40.6                         |
| Roseau, MN          | 134             | (110,161)              | 196             | 1.46              | 62            | (35,86)              | 418                       | 18              | 29.0                         |
| St. Louis, MN       | 2094            | (1990,2202)            | 2476            | 1.18              | 382           | (274,486)            | 192                       | 247             | 64.7                         |
| Scott, MN           | 768             | (708,833)              | 878             | 1.14              | 110           | (45,170)             | 73                        | 77              | 70.0                         |
| Sherburne, MN       | 606             | (549,667)              | 705             | 1.16              | 99            | (38,156)             | 100                       | 63              | 63.6                         |
| Sibley, MN          | 147             | (119,173)              | 124             | 0.84              | -23           | (-49,5)              | -151                      | 5               | NA                           |
| Stearns, MN         | 1136            | (1068,1221)            | 1376            | 1.21              | 240           | (155,308)            | 148                       | 197             | 82.1                         |
| Steele, MN          | 337             | (300,384)              | 363             | 1.08              | 26            | (-21,63)             | 71                        | 11              | 42.3                         |
| Stevens, MN         | 89              | (73,114)               | 91              | 1.02              | 2             | (-23,18)             | 20                        | 5               | 250.0                        |
| Swift, MN           | 126             | (100,149)              | 140             | 1.11              | 14            | (-9,40)              | 152                       | 18              | 128.6                        |
| Todd, MN            | 225             | (193,255)              | 238             | 1.06              | 13            | (-17,45)             | 53                        | 33              | 253.8                        |
| Traverse, MN        | 60              | (46,79)                | 61              | 1.02              | 1             | (-18,15)             | 30                        | 5               | 500.0                        |
| Wabasha, MN         | 209             | (176,241)              | 223             | 1.07              | 14            | (-18,47)             | 64                        | 5               | 35.7                         |
| Wadena, MN          | 234             | (198,264)              | 195             | 0.83              | -39           | (-69,-3)             | -278                      | 12              | NA                           |
| Waseca, MN          | 186             | (160,220)              | 196             | 1.05              | 10            | (-24,36)             | 53                        | 18              | 180.0                        |
| Washington, MN      | 1875            | (1787,1985)            | 2030            | 1.08              | 155           | (45,243)             | 58                        | 206             | 132.9                        |
| Watonwan, MN        | 125             | (98,147)               | 157             | 1.26              | 32            | (10,59)              | 288                       | 10              | 31.2                         |
| Wilkin, MN          | 85              | (66,106)               | 94              | 1.11              | 9             | (-12,28)             | 147                       | 12              | 133.3                        |
| Winona, MN          | 464             | (414,509)              | 470             | 1.01              | 6             | (-39,56)             | 12                        | 50              | 833.3                        |
| Wright, MN          | 932             | (883,1015)             | 992             | 1.06              | 60            | (-23,109)            | 43                        | 104             | 173.3                        |
| Yellow Medicine, MN | 100             | (77,120)               | 107             | 1.07              | 7             | (-13,30)             | 72                        | 15              | 214.3                        |
| Adams, MS           | 425             | (391,481)              | 493             | 1.16              | 68            | (12,102)             | 220                       | 61              | 89.7                         |
| Alcorn, MS          | 483             | (437,532)              | 541             | 1.12              | 58            | (9,104)              | 159                       | 42              | 72.4                         |
| Amite, MS           | 174             | (146,202)              | 193             | 1.11              | 19            | (-9,47)              | 157                       | 25              | 131.6                        |
| Attala, MS          | 267             | (225,296)              | 312             | 1.17              | 45            | (16,87)              | 248                       | 42              | 93.3                         |
| Benton, MS          | 124             | (100,149)              | 137             | 1.10              | 13            | (-12,37)             | 158                       | 22              | 169.2                        |
| Bolivar, MS         | 391             | (354,442)              | 552             | 1.41              | 161           | (110,198)            | 532                       | 94              | 58.4                         |
| Calhoun, MS         | 170             | (139,194)              | 252             | 1.48              | 82            | (58,113)             | 575                       | 23              | 28.0                         |
| Carroll, MS         | 111             | (89,138)               | 161             | 1.45              | 50            | (23,72)              | 526                       | 21              | 42.0                         |
| Chickasaw, MS       | 217             | (185,250)              | 250             | 1.15              | 33            | (0,65)               | 193                       | 35              | 106.1                        |
| Choctaw, MS         | 133             | (111,163)              | 133             | 1.00              | 0             | (-30,22)             | 0                         | 11              | Inf                          |
| Claiborne, MS       | 121             | (100,149)              | 124             | 1.02              | 3             | (-25,24)             | 34                        | 21              | 700.0                        |
| Clarke, MS          | 230             | (194,262)              | 260             | 1.13              | 30            | (-2,66)              | 198                       | 58              | 193.3                        |
| Clay, MS            | 237             | (199,265)              | 275             | 1.16              | 38            | (10,76)              | 202                       | 36              | 94.7                         |
| Coahoma, MS         | 290             | (259,335)              | 388             | 1.34              | 98            | (53,129)             | 454                       | 61              | 62.2                         |
| Copiah, MS          | 331             | (295,375)              | 416             | 1.26              | 85            | (41,121)             | 298                       | 53              | 62.4                         |
| Covington, MS       | 272             | (237,308)              | 346             | 1.27              | 74            | (38,109)             | 400                       | 52              | 70.3                         |
| DeSoto, MS          | 1572            | (1493,1670)            | 1754            | 1.12              | 182           | (84,261)             | 97                        | 174             | 95.6                         |
| Forrest, MS         | 826             | (772,901)              | 924             | 1.12              | 98            | (23,152)             | 131                       | 101             | 103.1                        |
| Franklin, MS        | 104             | (84,126)               | 122             | 1.17              | 18            | (-4,38)              | 231                       | 21              | 116.7                        |
| George, MS          | 317             | (281,358)              | 325             | 1.03              | 8             | (-33,44)             | 32                        | 39              | 487.5                        |
| Greene, MS          | 151             | (125,178)              | 164             | 1.09              | 13            | (-14,39)             | 95                        | 24              | 184.6                        |
| Grenada, MS         | 330             | (294,377)              | 375             | 1.14              | 45            | (-2,81)              | 214                       | 56              | 124.4                        |
| Hancock, MS         | 558             | (505,609)              | 616             | 1.10              | 58            | (7,111)              | 121                       | 57              | 98.3                         |
| Harrison, MS        | 2276            | (2195,2417)            | 2447            | 1.08              | 171           | (30,252)             | 81                        | 177             | 103.5                        |
| Hinds, MS           | 2319            | (2254,2478)            | 2870            | 1.24              | 551           | (392,616)            | 238                       | 284             | 51.5                         |
| Holmes, MS          | 233             | (204,273)              | 296             | 1.27              | 63            | (23,92)              | 367                       | 67              | 106.3                        |
| Humphreys, MS       | 107             | (90,137)               | 137             | 1.28              | 30            | (0,47)               | 372                       | 25              | 83.3                         |

Table C1: Primary Estimates for Each County

| County              | Expected Deaths | Expected Deaths 95% CI | Observed Deaths | Observed/Expected | Excess Deaths | Excess Deaths 95% CI | Excess Deaths Per 100,000 | COVID-19 Deaths | COVID-19 Excess Ratio (%) |
|---------------------|-----------------|------------------------|-----------------|-------------------|---------------|----------------------|---------------------------|-----------------|---------------------------|
| Itawamba, MS        | 313             | (283,364)              | 363             | 1.16              | 50            | (-1,80)              | 213                       | 48              | 96.0                      |
| Jackson, MS         | 1511            | (1448,1616)            | 1683            | 1.11              | 172           | (67,235)             | 119                       | 169             | 98.3                      |
| Jasper, MS          | 195             | (167,229)              | 247             | 1.27              | 52            | (18,80)              | 321                       | 26              | 50.0                      |
| Jefferson, MS       | 91              | (69,109)               | 107             | 1.18              | 16            | (-2,38)              | 233                       | 19              | 118.8                     |
| Jefferson Davis, MS | 166             | (139,197)              | 176             | 1.06              | 10            | (-21,37)             | 90                        | 22              | 220.0                     |
| Jones, MS           | 850             | (785,911)              | 900             | 1.06              | 50            | (-11,115)            | 73                        | 98              | 196.0                     |
| Kemper, MS          | 112             | (89,134)               | 128             | 1.14              | 16            | (-6,39)              | 162                       | 22              | 137.5                     |
| Lafayette, MS       | 395             | (349,438)              | 492             | 1.25              | 97            | (54,143)             | 173                       | 69              | 71.1                      |
| Lamar, MS           | 466             | (414,511)              | 562             | 1.21              | 96            | (51,148)             | 149                       | 54              | 56.2                      |
| Lauderdale, MS      | 865             | (807,936)              | 1189            | 1.37              | 324           | (253,382)            | 442                       | 157             | 48.5                      |
| Lawrence, MS        | 169             | (145,202)              | 202             | 1.20              | 33            | (0,57)               | 273                       | 19              | 57.6                      |
| Leake, MS           | 242             | (209,279)              | 315             | 1.30              | 73            | (36,106)             | 323                       | 67              | 91.8                      |
| Lee, MS             | 948             | (884,1020)             | 1136            | 1.20              | 188           | (116,252)            | 220                       | 139             | 73.9                      |
| Leflore, MS         | 375             | (337,420)              | 555             | 1.48              | 180           | (135,218)            | 640                       | 110             | 61.1                      |
| Lincoln, MS         | 435             | (389,484)              | 546             | 1.26              | 111           | (62,157)             | 327                       | 82              | 73.9                      |
| Lowndes, MS         | 690             | (653,770)              | 802             | 1.16              | 112           | (32,149)             | 192                       | 104             | 92.9                      |
| Madison, MS         | 1042            | (972,1122)             | 1186            | 1.14              | 144           | (64,214)             | 134                       | 136             | 94.4                      |
| Marion, MS          | 309             | (273,351)              | 448             | 1.45              | 139           | (97,175)             | 580                       | 71              | 51.1                      |
| Marshall, MS        | 434             | (389,485)              | 509             | 1.17              | 75            | (24,120)             | 214                       | 59              | 78.7                      |
| Monroe, MS          | 460             | (421,514)              | 590             | 1.28              | 130           | (76,169)             | 372                       | 93              | 71.5                      |
| Montgomery, MS      | 141             | (121,173)              | 203             | 1.44              | 62            | (30,82)              | 637                       | 38              | 61.3                      |
| Neshoba, MS         | 424             | (383,471)              | 560             | 1.32              | 136           | (89,177)             | 476                       | 132             | 97.1                      |
| Newton, MS          | 275             | (244,314)              | 318             | 1.16              | 43            | (4,74)               | 200                       | 44              | 102.3                     |
| Noxubee, MS         | 133             | (108,159)              | 165             | 1.24              | 32            | (6,57)               | 315                       | 26              | 81.2                      |
| Oktibbeha, MS       | 343             | (304,389)              | 454             | 1.32              | 111           | (65,150)             | 224                       | 77              | 69.4                      |
| Panola, MS          | 407             | (363,452)              | 475             | 1.17              | 68            | (23,112)             | 199                       | 77              | 113.2                     |
| Pearl River, MS     | 752             | (702,823)              | 849             | 1.13              | 97            | (26,147)             | 174                       | 88              | 90.7                      |
| Perry, MS           | 143             | (117,168)              | 210             | 1.47              | 67            | (42,93)              | 571                       | 27              | 40.3                      |
| Pike, MS            | 557             | (503,613)              | 622             | 1.12              | 65            | (9,119)              | 165                       | 67              | 103.1                     |
| Pontotoc, MS        | 325             | (286,369)              | 425             | 1.31              | 100           | (56,139)             | 310                       | 44              | 44.0                      |
| Prentiss, MS        | 345             | (307,388)              | 399             | 1.16              | 54            | (11,92)              | 212                       | 53              | 98.1                      |
| Quitman, MS         | 93              | (77,119)               | 140             | 1.51              | 47            | (21,63)              | 702                       | 15              | 31.9                      |
| Rankin, MS          | 1264            | (1195,1344)            | 1614            | 1.28              | 350           | (270,419)            | 225                       | 164             | 46.9                      |
| Scott, MS           | 319             | (287,365)              | 353             | 1.11              | 34            | (-12,66)             | 121                       | 50              | 147.1                     |
| Sharkey, MS         | 64              | (50,84)                | 84              | 1.31              | 20            | (0,34)               | 467                       | 15              | 75.0                      |
| Simpson, MS         | 321             | (282,360)              | 406             | 1.26              | 85            | (46,124)             | 322                       | 64              | 75.3                      |
| Smith, MS           | 184             | (153,211)              | 204             | 1.11              | 20            | (-7,51)              | 126                       | 21              | 105.0                     |
| Stone, MS           | 198             | (173,234)              | 252             | 1.27              | 54            | (18,79)              | 286                       | 15              | 27.8                      |
| Sunflower, MS       | 328             | (301,382)              | 437             | 1.33              | 109           | (55,136)             | 437                       | 62              | 56.9                      |
| Tallahatchie, MS    | 156             | (130,183)              | 210             | 1.35              | 54            | (27,80)              | 395                       | 33              | 61.1                      |
| Tate, MS            | 329             | (294,366)              | 418             | 1.27              | 89            | (52,124)             | 307                       | 66              | 74.2                      |
| Tippah, MS          | 284             | (249,325)              | 332             | 1.17              | 48            | (7,83)               | 217                       | 44              | 91.7                      |
| Tishomingo, MS      | 297             | (257,332)              | 366             | 1.23              | 69            | (34,109)             | 359                       | 49              | 71.0                      |
| Tunica, MS          | 118             | (98,143)               | 144             | 1.22              | 26            | (1,46)               | 264                       | 16              | 61.5                      |
| Union, MS           | 337             | (301,383)              | 355             | 1.05              | 18            | (-28,54)             | 62                        | 49              | 272.2                     |
| Walthall, MS        | 202             | (169,232)              | 233             | 1.15              | 31            | (1,64)               | 216                       | 37              | 119.4                     |
| Warren, MS          | 531             | (466,568)              | 671             | 1.26              | 140           | (103,205)            | 311                       | 86              | 61.4                      |
| Washington, MS      | 583             | (551,661)              | 790             | 1.36              | 207           | (129,239)            | 483                       | 106             | 51.2                      |
| Wayne, MS           | 225             | (188,250)              | 256             | 1.14              | 31            | (6,68)               | 155                       | 30              | 96.8                      |
| Webster, MS         | 150             | (120,176)              | 168             | 1.12              | 18            | (-8,48)              | 183                       | 22              | 122.2                     |
| Wilkinson, MS       | 140             | (119,169)              | 146             | 1.04              | 6             | (-23,27)             | 69                        | 20              | 333.3                     |
| Winston, MS         | 245             | (215,285)              | 300             | 1.22              | 55            | (15,85)              | 305                       | 54              | 98.2                      |
| Yalobusha, MS       | 194             | (169,235)              | 245             | 1.26              | 51            | (10,76)              | 417                       | 32              | 62.7                      |
| Yazoo, MS           | 306             | (260,337)              | 360             | 1.18              | 54            | (23,100)             | 194                       | 49              | 90.7                      |
| Adair, MO           | 235             | (207,274)              | 241             | 1.03              | 6             | (-33,34)             | 24                        | 12              | 200.0                     |
| Andrew, MO          | 167             | (142,196)              | 218             | 1.31              | 51            | (22,76)              | 285                       | 19              | 37.3                      |
| Atchison, MO        | 68              | (53,88)                | 95              | 1.40              | 27            | (7,42)               | 538                       | 12              | 44.4                      |
| Audrain, MO         | 326             | (290,370)              | 389             | 1.19              | 63            | (19,99)              | 248                       | 47              | 74.6                      |
| Barry, MO           | 465             | (415,513)              | 523             | 1.12              | 58            | (10,108)             | 160                       | 53              | 91.4                      |
| Barton, MO          | 144             | (117,170)              | 155             | 1.08              | 11            | (-15,38)             | 93                        | 16              | 145.5                     |
| Bates, MO           | 210             | (182,245)              | 225             | 1.07              | 15            | (-20,43)             | 92                        | 17              | 113.3                     |
| Benton, MO          | 346             | (303,387)              | 367             | 1.06              | 21            | (-20,64)             | 107                       | 26              | 123.8                     |
| Bollinger, MO       | 145             | (117,169)              | 186             | 1.28              | 41            | (17,69)              | 344                       | 16              | 39.0                      |
| Boone, MO           | 1227            | (1162,1316)            | 1402            | 1.14              | 175           | (86,240)             | 96                        | 95              | 54.3                      |

Table C1: Primary Estimates for Each County

| County             | Expected Deaths | Expected Deaths 95% CI | Observed Deaths | Observed/Expected | Excess Deaths | Excess Deaths 95% CI | Excess Deaths Per 100,000 | COVID-19 Deaths | COVID-19 to Excess Ratio (%) |
|--------------------|-----------------|------------------------|-----------------|-------------------|---------------|----------------------|---------------------------|-----------------|------------------------------|
| Buchanan, MO       | 939             | (872,1005)             | 1132            | 1.21              | 193           | (127,260)            | 219                       | 125             | 64.8                         |
| Butler, MO         | 599             | (532,643)              | 687             | 1.15              | 88            | (44,155)             | 206                       | 58              | 65.9                         |
| Caldwell, MO       | 111             | (91,138)               | 120             | 1.08              | 9             | (-18,29)             | 98                        | 5               | 55.6                         |
| Callaway, MO       | 449             | (407,501)              | 519             | 1.16              | 70            | (18,112)             | 155                       | 45              | 64.3                         |
| Camden, MO         | 534             | (483,583)              | 646             | 1.21              | 112           | (63,163)             | 241                       | 76              | 67.9                         |
| Cape Girardeau, MO | 853             | (795,925)              | 1079            | 1.26              | 226           | (154,284)            | 284                       | 120             | 53.1                         |
| Carroll, MO        | 112             | (91,137)               | 139             | 1.24              | 27            | (2,48)               | 312                       | 32              | 118.5                        |
| Carter, MO         | 86              | (67,110)               | 92              | 1.07              | 6             | (-18,25)             | 103                       | 5               | 83.3                         |
| Cass, MO           | 1071            | (1013,1160)            | 1119            | 1.04              | 48            | (-41,106)            | 45                        | 83              | 172.9                        |
| Cedar, MO          | 231             | (198,261)              | 187             | 0.81              | -44           | (-74,-11)            | -307                      | 14              | NA                           |
| Chariton, MO       | 102             | (80,125)               | 133             | 1.30              | 31            | (8,53)               | 419                       | 19              | 61.3                         |
| Christian, MO      | 770             | (709,835)              | 857             | 1.11              | 87            | (22,148)             | 96                        | 87              | 100.0                        |
| Clark, MO          | 82              | (61,101)               | 99              | 1.21              | 17            | (-2,38)              | 240                       | 20              | 117.6                        |
| Clay, MO           | 1968            | (1866,2068)            | 2215            | 1.13              | 247           | (147,349)            | 97                        | 241             | 97.6                         |
| Clinton, MO        | 257             | (221,289)              | 313             | 1.22              | 56            | (24,92)              | 276                       | 47              | 83.9                         |
| Cole, MO           | 722             | (673,792)              | 882             | 1.22              | 160           | (90,209)             | 208                       | 138             | 86.2                         |
| Cooper, MO         | 192             | (160,222)              | 203             | 1.06              | 11            | (-19,43)             | 63                        | 21              | 190.9                        |
| Crawford, MO       | 329             | (299,379)              | 362             | 1.10              | 33            | (-17,63)             | 139                       | 31              | 93.9                         |
| Dade, MO           | 114             | (95,142)               | 135             | 1.18              | 21            | (-7,40)              | 280                       | 28              | 133.3                        |
| Dallas, MO         | 237             | (203,276)              | 306             | 1.29              | 69            | (30,103)             | 408                       | 29              | 42.0                         |
| Daviess, MO        | 88              | (65,107)               | 112             | 1.27              | 24            | (5,47)               | 292                       | 14              | 58.3                         |
| DeKalb, MO         | 136             | (109,160)              | 157             | 1.15              | 21            | (-3,48)              | 164                       | 24              | 114.3                        |
| Dent, MO           | 200             | (174,237)              | 268             | 1.34              | 68            | (31,94)              | 441                       | 28              | 41.2                         |
| Douglas, MO        | 208             | (179,242)              | 205             | 0.99              | -3            | (-37,26)             | -22                       | 27              | NA                           |
| Dunklin, MO        | 441             | (400,495)              | 558             | 1.27              | 117           | (63,158)             | 416                       | 60              | 51.3                         |
| Franklin, MO       | 1109            | (1050,1204)            | 1281            | 1.16              | 172           | (77,231)             | 165                       | 149             | 86.6                         |
| Gasconade, MO      | 218             | (189,256)              | 271             | 1.24              | 53            | (15,82)              | 361                       | 38              | 71.7                         |
| Gentry, MO         | 99              | (80,125)               | 108             | 1.09              | 9             | (-17,28)             | 137                       | 16              | 177.8                        |
| Greene, MO         | 3145            | (3016,3289)            | 3415            | 1.09              | 270           | (126,399)            | 91                        | 378             | 140.0                        |
| Grundy, MO         | 129             | (100,148)              | 152             | 1.18              | 23            | (4,52)               | 235                       | 36              | 156.5                        |
| Harrison, MO       | 113             | (89,136)               | 123             | 1.09              | 10            | (-13,34)             | 122                       | 18              | 180.0                        |
| Henry, MO          | 302             | (259,335)              | 363             | 1.20              | 61            | (28,104)             | 278                       | 34              | 55.7                         |
| Hickory, MO        | 158             | (127,181)              | 161             | 1.02              | 3             | (-20,34)             | 31                        | 28              | 933.3                        |
| Holt, MO           | 55              | (39,70)                | 72              | 1.31              | 17            | (2,33)               | 387                       | 18              | 105.9                        |
| Howard, MO         | 117             | (97,144)               | 109             | 0.93              | -8            | (-35,12)             | -79                       | 5               | NA                           |
| Howell, MO         | 531             | (488,585)              | 637             | 1.20              | 106           | (52,149)             | 265                       | 89              | 84.0                         |
| Iron, MO           | 168             | (140,195)              | 185             | 1.10              | 17            | (-10,45)             | 168                       | 12              | 70.6                         |
| Jackson, MO        | 6525            | (6348,6723)            | 7542            | 1.16              | 1017          | (819,1194)           | 144                       | 545             | 53.6                         |
| Jasper, MO         | 1266            | (1203,1365)            | 1505            | 1.19              | 239           | (140,302)            | 196                       | 191             | 79.9                         |
| Jefferson, MO      | 2270            | (2189,2399)            | 2468            | 1.09              | 198           | (69,279)             | 88                        | 221             | 111.6                        |
| Johnson, MO        | 425             | (380,469)              | 494             | 1.16              | 69            | (25,114)             | 129                       | 51              | 73.9                         |
| Knox, MO           | 45              | (30,59)                | 49              | 1.09              | 4             | (-10,19)             | 103                       | 5               | 125.0                        |
| Laclede, MO        | 492             | (452,553)              | 495             | 1.01              | 3             | (-58,43)             | 8                         | 58              | 1933.3                       |
| Lafayette, MO      | 436             | (385,480)              | 461             | 1.06              | 25            | (-19,76)             | 77                        | 46              | 184.0                        |
| Lawrence, MO       | 533             | (490,598)              | 545             | 1.02              | 12            | (-53,55)             | 31                        | 61              | 508.3                        |
| Lewis, MO          | 127             | (102,150)              | 124             | 0.98              | -3            | (-26,22)             | -31                       | 11              | NA                           |
| Lincoln, MO        | 556             | (503,609)              | 562             | 1.01              | 6             | (-47,59)             | 10                        | 53              | 883.3                        |
| Linn, MO           | 173             | (141,194)              | 194             | 1.12              | 21            | (0,53)               | 179                       | 15              | 71.4                         |
| Livingston, MO     | 172             | (143,198)              | 201             | 1.17              | 29            | (3,58)               | 194                       | 35              | 120.7                        |
| McDonald, MO       | 274             | (243,314)              | 307             | 1.12              | 33            | (-7,64)              | 139                       | 29              | 87.9                         |
| Macon, MO          | 203             | (175,240)              | 268             | 1.32              | 65            | (28,93)              | 434                       | 18              | 27.7                         |
| Madison, MO        | 173             | (140,196)              | 210             | 1.21              | 37            | (14,70)              | 306                       | 22              | 59.5                         |
| Maries, MO         | 107             | (87,132)               | 151             | 1.41              | 44            | (19,64)              | 508                       | 13              | 29.5                         |
| Marion, MO         | 362             | (328,405)              | 377             | 1.04              | 15            | (-28,49)             | 53                        | 42              | 280.0                        |
| Mercer, MO         | 46              | (31,59)                | 70              | 1.52              | 24            | (11,39)              | 672                       | 10              | 41.7                         |
| Miller, MO         | 297             | (256,329)              | 347             | 1.17              | 50            | (18,91)              | 195                       | 44              | 88.0                         |
| Mississippi, MO    | 172             | (150,206)              | 219             | 1.27              | 47            | (13,69)              | 364                       | 24              | 51.1                         |
| Moniteau, MO       | 162             | (136,193)              | 199             | 1.23              | 37            | (6,63)               | 227                       | 27              | 73.0                         |
| Monroe, MO         | 117             | (98,143)               | 128             | 1.09              | 11            | (-15,30)             | 125                       | 18              | 163.6                        |
| Montgomery, MO     | 186             | (167,227)              | 195             | 1.05              | 9             | (-32,28)             | 77                        | 16              | 177.8                        |
| Morgan, MO         | 302             | (265,340)              | 338             | 1.12              | 36            | (-2,73)              | 173                       | 37              | 102.8                        |
| New Madrid, MO     | 247             | (221,293)              | 337             | 1.36              | 90            | (44,116)             | 537                       | 40              | 44.4                         |
| Newton, MO         | 701             | (648,765)              | 748             | 1.07              | 47            | (-17,100)            | 81                        | 87              | 185.1                        |
| Nodaway, MO        | 198             | (165,229)              | 201             | 1.02              | 3             | (-28,36)             | 14                        | 21              | 700.0                        |

Table C1: Primary Estimates for Each County

| County              | Expected Deaths | Expected Deaths 95% CI | Observed Deaths | Observed/Expected | Excess Deaths | Excess Deaths 95% CI | Excess Deaths Per 100,000 | COVID-19 Deaths | COVID-19 to Excess Ratio (%) |
|---------------------|-----------------|------------------------|-----------------|-------------------|---------------|----------------------|---------------------------|-----------------|------------------------------|
| Oregon, MO          | 155             | (127,180)              | 166             | 1.07              | 11            | (-14,39)             | 105                       | 10              | 90.9                         |
| Osage, MO           | 143             | (116,171)              | 146             | 1.02              | 3             | (-25,30)             | 22                        | 12              | 400.0                        |
| Ozark, MO           | 126             | (102,153)              | 162             | 1.29              | 36            | (9,60)               | 416                       | 12              | 33.3                         |
| Pemiscot, MO        | 231             | (200,266)              | 304             | 1.32              | 73            | (38,104)             | 479                       | 32              | 43.8                         |
| Perry, MO           | 208             | (177,241)              | 258             | 1.24              | 50            | (17,81)              | 262                       | 26              | 52.0                         |
| Pettis, MO          | 487             | (441,538)              | 589             | 1.21              | 102           | (51,148)             | 239                       | 74              | 72.5                         |
| Phelps, MO          | 492             | (443,540)              | 591             | 1.20              | 99            | (51,148)             | 221                       | 72              | 72.7                         |
| Pike, MO            | 217             | (185,250)              | 229             | 1.06              | 12            | (-21,44)             | 66                        | 26              | 216.7                        |
| Platte, MO          | 800             | (738,869)              | 874             | 1.09              | 74            | (5,136)              | 69                        | 78              | 105.4                        |
| Polk, MO            | 400             | (362,451)              | 419             | 1.05              | 19            | (-32,57)             | 57                        | 44              | 231.6                        |
| Pulaski, MO         | 355             | (317,401)              | 409             | 1.15              | 54            | (8,92)               | 103                       | 44              | 81.5                         |
| Putnam, MO          | 76              | (66,104)               | 72              | 0.95              | -4            | (-32,6)              | -85                       | 5               | NA                           |
| Ralls, MO           | 99              | (79,120)               | 146             | 1.47              | 47            | (26,67)              | 461                       | 16              | 34.0                         |
| Randolph, MO        | 306             | (268,348)              | 342             | 1.12              | 36            | (-6,74)              | 145                       | 45              | 125.0                        |
| Ray, MO             | 288             | (254,328)              | 338             | 1.17              | 50            | (10,84)              | 218                       | 24              | 48.0                         |
| Reynolds, MO        | 95              | (77,119)               | 95              | 1.00              | 0             | (-24,18)             | 0                         | 5               | Inf                          |
| Ripley, MO          | 188             | (160,217)              | 220             | 1.17              | 32            | (3,60)               | 245                       | 18              | 56.2                         |
| St. Charles, MO     | 3363            | (3269,3529)            | 3791            | 1.13              | 428           | (262,522)            | 105                       | 436             | 101.9                        |
| St. Clair, MO       | 140             | (109,162)              | 165             | 1.18              | 25            | (3,56)               | 266                       | 17              | 68.0                         |
| Ste. Genevieve, MO  | 205             | (172,234)              | 206             | 1.00              | 1             | (-28,34)             | 6                         | 11              | 1100.0                       |
| St. Francois, MO    | 806             | (742,867)              | 974             | 1.21              | 168           | (107,232)            | 251                       | 105             | 62.5                         |
| St. Louis, MO       | 10944           | (10747,11289)          | 12525           | 1.14              | 1581          | (1236,1778)          | 159                       | 1485            | 93.9                         |
| Saline, MO          | 258             | (225,297)              | 315             | 1.22              | 57            | (18,90)              | 250                       | 46              | 80.7                         |
| Schuyler, MO        | 57              | (39,70)                | 60              | 1.05              | 3             | (-10,21)             | 63                        | 5               | 166.7                        |
| Scotland, MO        | 51              | (33,62)                | 61              | 1.20              | 10            | (-1,28)              | 201                       | 5               | 50.0                         |
| Scott, MO           | 462             | (422,519)              | 563             | 1.22              | 101           | (44,141)             | 264                       | 59              | 58.4                         |
| Shannon, MO         | 100             | (87,131)               | 141             | 1.41              | 41            | (10,54)              | 507                       | 15              | 36.6                         |
| Shelby, MO          | 84              | (63,104)               | 97              | 1.15              | 13            | (-7,34)              | 213                       | 5               | 38.5                         |
| Stoddard, MO        | 401             | (347,436)              | 454             | 1.13              | 53            | (18,107)             | 183                       | 52              | 98.1                         |
| Stone, MO           | 458             | (421,517)              | 454             | 0.99              | -4            | (-63,33)             | -13                       | 47              | NA                           |
| Sullivan, MO        | 74              | (57,95)                | 84              | 1.14              | 10            | (-11,27)             | 160                       | 13              | 130.0                        |
| Taney, MO           | 666             | (604,718)              | 718             | 1.08              | 52            | (0,114)              | 91                        | 75              | 144.2                        |
| Texas, MO           | 338             | (299,383)              | 394             | 1.17              | 56            | (11,95)              | 221                       | 22              | 39.3                         |
| Vernon, MO          | 247             | (209,279)              | 281             | 1.14              | 34            | (2,72)               | 166                       | 40              | 117.6                        |
| Warren, MO          | 337             | (296,378)              | 371             | 1.10              | 34            | (-7,75)              | 96                        | 22              | 64.7                         |
| Washington, MO      | 320             | (285,364)              | 370             | 1.16              | 50            | (6,85)               | 202                       | 47              | 94.0                         |
| Wayne, MO           | 194             | (158,215)              | 224             | 1.15              | 30            | (9,66)               | 235                       | 21              | 70.0                         |
| Webster, MO         | 406             | (362,449)              | 434             | 1.07              | 28            | (-15,72)             | 70                        | 54              | 192.9                        |
| Worth, MO           | 32              | (21,45)                | 29              | 0.91              | -3            | (-16,8)              | -148                      | 5               | NA                           |
| Wright, MO          | 288             | (259,332)              | 232             | 0.81              | -56           | (-100,-27)           | -304                      | 31              | NA                           |
| St. Louis city, MO  | 3002            | (2908,3159)            | 3646            | 1.21              | 644           | (487,738)            | 220                       | 362             | 56.2                         |
| Beaverhead, MT      | 95              | (74,118)               | 118             | 1.24              | 23            | (0,44)               | 247                       | 5               | 21.7                         |
| Big Horn, MT        | 149             | (126,181)              | 216             | 1.45              | 67            | (35,90)              | 510                       | 66              | 98.5                         |
| Blaine, MT          | 66              | (49,85)                | 109             | 1.65              | 43            | (24,60)              | 620                       | 24              | 55.8                         |
| Broadwater, MT      | 63              | (45,78)                | 56              | 0.89              | -7            | (-22,11)             | -109                      | 5               | NA                           |
| Carbon, MT          | 112             | (89,134)               | 128             | 1.14              | 16            | (-6,39)              | 149                       | 5               | 31.2                         |
| Cascade, MT         | 949             | (884,1029)             | 1078            | 1.14              | 129           | (49,194)             | 158                       | 146             | 113.2                        |
| Chouteau, MT        | 65              | (47,83)                | 71              | 1.09              | 6             | (-12,24)             | 105                       | 5               | 83.3                         |
| Custer, MT          | 131             | (106,155)              | 139             | 1.06              | 8             | (-16,33)             | 71                        | 13              | 162.5                        |
| Daniels, MT         | 23              | (13,33)                | 28              | 1.22              | 5             | (-5,15)              | 284                       | 5               | 100.0                        |
| Dawson, MT          | 75              | (56,92)                | 135             | 1.80              | 60            | (43,79)              | 734                       | 24              | 40.0                         |
| Deer Lodge, MT      | 123             | (97,145)               | 151             | 1.23              | 28            | (6,54)               | 305                       | 10              | 35.7                         |
| Fallon, MT          | 28              | (18,40)                | 39              | 1.39              | 11            | (-1,21)              | 399                       | 5               | 45.5                         |
| Fergus, MT          | 148             | (121,172)              | 178             | 1.20              | 30            | (6,57)               | 278                       | 20              | 66.7                         |
| Flathead, MT        | 1017            | (942,1085)             | 1137            | 1.12              | 120           | (52,195)             | 113                       | 74              | 61.7                         |
| Gallatin, MT        | 594             | (542,657)              | 629             | 1.06              | 35            | (-28,87)             | 30                        | 44              | 125.7                        |
| Glacier, MT         | 145             | (116,169)              | 180             | 1.24              | 35            | (11,64)              | 252                       | 49              | 140.0                        |
| Granite, MT         | 32              | (20,45)                | 29              | 0.91              | -3            | (-16,9)              | -88                       | 5               | NA                           |
| Hill, MT            | 152             | (123,179)              | 195             | 1.28              | 43            | (16,72)              | 267                       | 39              | 90.7                         |
| Jefferson, MT       | 104             | (81,125)               | 155             | 1.49              | 51            | (30,74)              | 411                       | 5               | 9.8                          |
| Judith Basin, MT    | 18              | (10,29)                | 16              | 0.89              | -2            | (-13,6)              | -102                      | 5               | NA                           |
| Lake, MT            | 340             | (300,380)              | 366             | 1.08              | 26            | (-14,66)             | 86                        | 26              | 100.0                        |
| Lewis and Clark, MT | 684             | (637,752)              | 710             | 1.04              | 26            | (-42,73)             | 37                        | 52              | 200.0                        |
| Liberty, MT         | 14              | (6,22)                 | 21              | 1.50              | 7             | (-1,15)              | 285                       | 5               | 71.4                         |



Table C1: Primary Estimates for Each County

| County           | Expected Deaths | Expected Deaths 95% CI | Observed Deaths | Observed/Expected | Excess Deaths | Excess Deaths 95% CI | Excess Deaths Per 100,000 | COVID-19 Deaths | COVID-19 to Excess Ratio (%) |
|------------------|-----------------|------------------------|-----------------|-------------------|---------------|----------------------|---------------------------|-----------------|------------------------------|
| Lincoln, MT      | 269             | (232,297)              | 292             | 1.09              | 23            | (-5,60)              | 113                       | 16              | 69.6                         |
| McCone, MT       | 19              | (10,30)                | 14              | 0.74              | -5            | (-16,4)              | -309                      | 0               | 0.0                          |
| Madison, MT      | 97              | (79,125)               | 104             | 1.07              | 7             | (-21,25)             | 73                        | 5               | 71.4                         |
| Meagher, MT      | 24              | (13,33)                | 20              | 0.83              | -4            | (-13,7)              | -212                      | 5               | NA                           |
| Mineral, MT      | 59              | (40,72)                | 63              | 1.07              | 4             | (-9,23)              | 90                        | 5               | 125.0                        |
| Missoula, MT     | 954             | (882,1015)             | 999             | 1.05              | 45            | (-16,117)            | 37                        | 68              | 151.1                        |
| Musselshell, MT  | 65              | (49,84)                | 72              | 1.11              | 7             | (-12,23)             | 150                       | 10              | 142.9                        |
| Park, MT         | 165             | (138,196)              | 194             | 1.18              | 29            | (-2,56)              | 167                       | 5               | 17.2                         |
| Phillips, MT     | 55              | (47,79)                | 58              | 1.05              | 3             | (-21,11)             | 75                        | 12              | 400.0                        |
| Pondera, MT      | 84              | (69,109)               | 74              | 0.88              | -10           | (-35,5)              | -168                      | 5               | NA                           |
| Powder River, MT | 16              | (8,25)                 | 20              | 1.25              | 4             | (-5,12)              | 241                       | 5               | 125.0                        |
| Powell, MT       | 84              | (66,107)               | 95              | 1.13              | 11            | (-12,29)             | 157                       | 5               | 45.5                         |
| Prairie, MT      | 20              | (12,32)                | 20              | 1.00              | 0             | (-12,8)              | 0                         | 5               | Inf                          |
| Ravalli, MT      | 517             | (483,582)              | 560             | 1.08              | 43            | (-22,77)             | 97                        | 38              | 88.4                         |
| Richland, MT     | 79              | (62,101)               | 114             | 1.44              | 35            | (13,52)              | 328                       | 15              | 42.9                         |
| Roosevelt, MT    | 128             | (104,156)              | 196             | 1.53              | 68            | (40,92)              | 626                       | 47              | 69.1                         |
| Rosebud, MT      | 96              | (76,118)               | 138             | 1.44              | 42            | (20,62)              | 483                       | 40              | 95.2                         |
| Sanders, MT      | 165             | (137,196)              | 190             | 1.15              | 25            | (-6,53)              | 206                       | 14              | 56.0                         |
| Sheridan, MT     | 40              | (26,55)                | 38              | 0.95              | -2            | (-17,12)             | -61                       | 5               | NA                           |
| Silver Bow, MT   | 433             | (385,481)              | 468             | 1.08              | 35            | (-13,83)             | 100                       | 57              | 162.9                        |
| Stillwater, MT   | 87              | (64,105)               | 107             | 1.23              | 20            | (2,43)               | 206                       | 10              | 50.0                         |
| Sweet Grass, MT  | 34              | (21,46)                | 51              | 1.50              | 17            | (5,30)               | 451                       | 5               | 29.4                         |
| Teton, MT        | 67              | (54,90)                | 81              | 1.21              | 14            | (-9,27)              | 224                       | 5               | 35.7                         |
| Toole, MT        | 59              | (42,76)                | 55              | 0.93              | -4            | (-21,13)             | -82                       | 5               | NA                           |
| Valley, MT       | 95              | (77,121)               | 102             | 1.07              | 7             | (-19,25)             | 94                        | 17              | 242.9                        |
| Wheatland, MT    | 37              | (25,53)                | 33              | 0.89              | -4            | (-20,8)              | -171                      | 5               | NA                           |
| Wibaux, MT       | 17              | (9,26)                 | 23              | 1.35              | 6             | (-3,14)              | 561                       | 5               | 83.3                         |
| Yellowstone, MT  | 1669            | (1591,1764)            | 1897            | 1.14              | 228           | (133,306)            | 141                       | 198             | 86.8                         |
| Adams, NE        | 334             | (296,377)              | 388             | 1.16              | 54            | (11,92)              | 173                       | 52              | 96.3                         |
| Antelope, NE     | 73              | (50,85)                | 91              | 1.25              | 18            | (6,41)               | 285                       | 11              | 61.1                         |
| Boone, NE        | 66              | (48,84)                | 75              | 1.14              | 9             | (-9,27)              | 178                       | 10              | 111.1                        |
| Box Butte, NE    | 121             | (97,147)               | 133             | 1.10              | 12            | (-14,36)             | 112                       | 5               | 41.7                         |
| Boyd, NE         | 35              | (24,51)                | 38              | 1.09              | 3             | (-13,14)             | 155                       | 5               | 166.7                        |
| Brown, NE        | 37              | (24,51)                | 51              | 1.38              | 14            | (0,27)               | 484                       | 5               | 35.7                         |
| Buffalo, NE      | 381             | (342,427)              | 457             | 1.20              | 76            | (30,115)             | 152                       | 64              | 84.2                         |
| Burt, NE         | 92              | (74,116)               | 109             | 1.18              | 17            | (-7,35)              | 266                       | 11              | 64.7                         |
| Butler, NE       | 115             | (96,143)               | 104             | 0.90              | -11           | (-39,8)              | -136                      | 11              | NA                           |
| Cass, NE         | 243             | (204,275)              | 305             | 1.26              | 62            | (30,101)             | 232                       | 22              | 35.5                         |
| Cedar, NE        | 106             | (83,125)               | 105             | 0.99              | -1            | (-20,22)             | -12                       | 21              | NA                           |
| Chase, NE        | 58              | (42,75)                | 56              | 0.97              | -2            | (-19,14)             | -49                       | 5               | NA                           |
| Cherry, NE       | 70              | (52,88)                | 80              | 1.14              | 10            | (-8,28)              | 176                       | 12              | 120.0                        |
| Cheyenne, NE     | 100             | (82,126)               | 126             | 1.26              | 26            | (0,44)               | 300                       | 15              | 57.7                         |
| Clay, NE         | 72              | (53,90)                | 90              | 1.25              | 18            | (0,37)               | 289                       | 15              | 83.3                         |
| Colfax, NE       | 75              | (55,95)                | 78              | 1.04              | 3             | (-17,23)             | 27                        | 22              | 733.3                        |
| Cuming, NE       | 93              | (75,118)               | 121             | 1.30              | 28            | (3,46)               | 315                       | 12              | 42.9                         |
| Custer, NE       | 117             | (89,136)               | 144             | 1.23              | 27            | (8,55)               | 251                       | 17              | 63.0                         |
| Dakota, NE       | 173             | (146,202)              | 242             | 1.40              | 69            | (40,96)              | 343                       | 74              | 107.2                        |
| Dawes, NE        | 89              | (70,110)               | 106             | 1.19              | 17            | (-4,36)              | 198                       | 16              | 94.1                         |
| Dawson, NE       | 213             | (182,245)              | 261             | 1.23              | 48            | (16,79)              | 201                       | 41              | 85.4                         |
| Deuel, NE        | 24              | (14,35)                | 22              | 0.92              | -2            | (-13,8)              | -114                      | 5               | NA                           |
| Dixon, NE        | 57              | (38,71)                | 74              | 1.30              | 17            | (3,36)               | 303                       | 14              | 82.4                         |
| Dodge, NE        | 452             | (404,497)              | 532             | 1.18              | 80            | (35,128)             | 217                       | 62              | 77.5                         |
| Douglas, NE      | 4324            | (4147,4459)            | 4936            | 1.14              | 612           | (477,789)            | 106                       | 550             | 89.9                         |
| Dundy, NE        | 26              | (18,42)                | 25              | 0.96              | -1            | (-17,7)              | -58                       | 5               | NA                           |
| Fillmore, NE     | 78              | (61,101)               | 78              | 1.00              | 0             | (-23,17)             | 0                         | 14              | Inf                          |
| Franklin, NE     | 38              | (27,54)                | 47              | 1.24              | 9             | (-7,20)              | 295                       | 5               | 55.6                         |
| Frontier, NE     | 22              | (13,34)                | 24              | 1.09              | 2             | (-10,11)             | 78                        | 5               | 250.0                        |
| Furnas, NE       | 65              | (45,79)                | 67              | 1.03              | 2             | (-12,22)             | 43                        | 5               | 250.0                        |
| Gage, NE         | 270             | (238,309)              | 299             | 1.11              | 29            | (-10,61)             | 136                       | 25              | 86.2                         |
| Garden, NE       | 27              | (18,40)                | 35              | 1.30              | 8             | (-5,17)              | 421                       | 0               | 0.0                          |
| Garfield, NE     | 43              | (31,59)                | 30              | 0.70              | -13           | (-29,-1)             | -673                      | 5               | NA                           |
| Gosper, NE       | 23              | (13,35)                | 40              | 1.74              | 17            | (5,27)               | 879                       | 5               | 29.4                         |
| Greeley, NE      | 29              | (18,41)                | 34              | 1.17              | 5             | (-7,16)              | 216                       | 5               | 100.0                        |
| Hall, NE         | 590             | (530,640)              | 630             | 1.07              | 40            | (-10,100)            | 64                        | 114             | 285.0                        |

Table C1: Primary Estimates for Each County

| County           | Expected Deaths | Expected Deaths 95% CI | Observed Deaths | Observed/Expected | Excess Deaths | Excess Deaths 95% CI | Excess Deaths Per 100,000 | COVID-19 Deaths | COVID-19 Excess Ratio (%) |
|------------------|-----------------|------------------------|-----------------|-------------------|---------------|----------------------|---------------------------|-----------------|---------------------------|
| Hamilton, NE     | 86              | (67,106)               | 120             | 1.40              | 34            | (14,53)              | 362                       | 23              | 67.6                      |
| Harlan, NE       | 36              | (22,48)                | 42              | 1.17              | 6             | (-6,20)              | 179                       | 5               | 83.3                      |
| Hitchcock, NE    | 41              | (29,56)                | 55              | 1.34              | 14            | (-1,26)              | 502                       | 5               | 35.7                      |
| Holt, NE         | 135             | (107,155)              | 132             | 0.98              | -3            | (-23,25)             | -29                       | 18              | NA                        |
| Howard, NE       | 77              | (62,103)               | 81              | 1.05              | 4             | (-22,19)             | 61                        | 15              | 375.0                     |
| Jefferson, NE    | 102             | (84,127)               | 118             | 1.16              | 16            | (-9,34)              | 229                       | 5               | 31.2                      |
| Johnson, NE      | 75              | (60,97)                | 54              | 0.72              | -21           | (-43,-6)             | -415                      | 5               | NA                        |
| Kearney, NE      | 76              | (54,91)                | 74              | 0.97              | -2            | (-17,20)             | -30                       | 5               | NA                        |
| Keith, NE        | 97              | (76,119)               | 89              | 0.92              | -8            | (-30,13)             | -101                      | 5               | NA                        |
| Kimball, NE      | 58              | (46,80)                | 67              | 1.16              | 9             | (-13,21)             | 247                       | 5               | 55.6                      |
| Knox, NE         | 104             | (78,124)               | 130             | 1.25              | 26            | (6,52)               | 312                       | 14              | 53.8                      |
| Lancaster, NE    | 2416            | (2313,2535)            | 2560            | 1.06              | 144           | (25,247)             | 44                        | 173             | 120.1                     |
| Lincoln, NE      | 393             | (354,444)              | 468             | 1.19              | 75            | (24,114)             | 215                       | 61              | 81.3                      |
| Madison, NE      | 400             | (357,448)              | 384             | 0.96              | -16           | (-64,27)             | -45                       | 46              | NA                        |
| Merrick, NE      | 85              | (68,108)               | 98              | 1.15              | 13            | (-10,30)             | 174                       | 19              | 146.2                     |
| Morrill, NE      | 59              | (43,75)                | 76              | 1.29              | 17            | (1,33)               | 381                       | 15              | 88.2                      |
| Nance, NE        | 54              | (40,71)                | 61              | 1.13              | 7             | (-10,21)             | 203                       | 5               | 71.4                      |
| Nemaha, NE       | 82              | (63,100)               | 99              | 1.21              | 17            | (-1,36)              | 245                       | 15              | 88.2                      |
| Nuckolls, NE     | 64              | (49,84)                | 81              | 1.27              | 17            | (-3,32)              | 418                       | 14              | 82.4                      |
| Otoe, NE         | 173             | (145,200)              | 179             | 1.03              | 6             | (-21,34)             | 37                        | 5               | 83.3                      |
| Pawnee, NE       | 39              | (26,55)                | 47              | 1.21              | 8             | (-8,21)              | 304                       | 5               | 62.5                      |
| Perkins, NE      | 38              | (25,54)                | 35              | 0.92              | -3            | (-19,10)             | -100                      | 11              | NA                        |
| Phelps, NE       | 108             | (83,127)               | 118             | 1.09              | 10            | (-9,35)              | 112                       | 13              | 130.0                     |
| Pierce, NE       | 77              | (56,94)                | 75              | 0.97              | -2            | (-19,19)             | -28                       | 21              | NA                        |
| Platte, NE       | 316             | (277,356)              | 351             | 1.11              | 35            | (-5,74)              | 104                       | 56              | 160.0                     |
| Polk, NE         | 56              | (40,72)                | 102             | 1.82              | 46            | (30,62)              | 892                       | 15              | 32.6                      |
| Red Willow, NE   | 148             | (126,178)              | 148             | 1.00              | 0             | (-30,22)             | 0                         | 12              | Inf                       |
| Richardson, NE   | 123             | (97,142)               | 156             | 1.27              | 33            | (14,59)              | 420                       | 20              | 60.6                      |
| Rock, NE         | 23              | (12,32)                | 20              | 0.87              | -3            | (-12,8)              | -241                      | 5               | NA                        |
| Saline, NE       | 145             | (117,168)              | 116             | 0.80              | -29           | (-52,-1)             | -200                      | 5               | NA                        |
| Sarpy, NE        | 1137            | (1077,1220)            | 1313            | 1.15              | 176           | (93,236)             | 93                        | 132             | 75.0                      |
| Saunders, NE     | 242             | (207,270)              | 281             | 1.16              | 39            | (11,74)              | 178                       | 19              | 48.7                      |
| Scotts Bluff, NE | 424             | (386,478)              | 537             | 1.27              | 113           | (59,151)             | 318                       | 102             | 90.3                      |
| Seward, NE       | 188             | (152,211)              | 180             | 0.96              | -8            | (-31,28)             | -45                       | 25              | NA                        |
| Sheridan, NE     | 80              | (62,102)               | 94              | 1.18              | 14            | (-8,32)              | 281                       | 17              | 121.4                     |
| Sherman, NE      | 39              | (25,51)                | 55              | 1.41              | 16            | (4,30)               | 545                       | 5               | 31.2                      |
| Stanton, NE      | 44              | (30,60)                | 72              | 1.64              | 28            | (12,42)              | 470                       | 12              | 42.9                      |
| Thayer, NE       | 85              | (68,110)               | 78              | 0.92              | -7            | (-32,10)             | -138                      | 5               | NA                        |
| Thurston, NE     | 96              | (81,124)               | 103             | 1.07              | 7             | (-21,22)             | 94                        | 10              | 142.9                     |
| Valley, NE       | 50              | (38,71)                | 47              | 0.94              | -3            | (-24,9)              | -73                       | 5               | NA                        |
| Washington, NE   | 206             | (170,232)              | 209             | 1.01              | 3             | (-23,39)             | 14                        | 20              | 666.7                     |
| Wayne, NE        | 72              | (53,89)                | 80              | 1.11              | 8             | (-9,27)              | 84                        | 5               | 62.5                      |
| Webster, NE      | 63              | (46,81)                | 63              | 1.00              | 0             | (-18,17)             | 0                         | 5               | Inf                       |
| York, NE         | 169             | (140,196)              | 160             | 0.95              | -9            | (-36,20)             | -65                       | 13              | NA                        |
| Churchill, NV    | 305             | (268,340)              | 374             | 1.23              | 69            | (34,106)             | 272                       | 46              | 66.7                      |
| Clark, NV        | 18492           | (18215,18935)          | 21237           | 1.15              | 2745          | (2302,3022)          | 118                       | 2603            | 94.8                      |
| Douglas, NV      | 568             | (518,625)              | 613             | 1.08              | 45            | (-12,95)             | 91                        | 47              | 104.4                     |
| Elko, NV         | 330             | (292,372)              | 404             | 1.22              | 74            | (32,112)             | 140                       | 42              | 56.8                      |
| Humboldt, NV     | 132             | (109,158)              | 146             | 1.11              | 14            | (-12,37)             | 83                        | 11              | 78.6                      |
| Lander, NV       | 59              | (43,78)                | 65              | 1.10              | 6             | (-13,22)             | 109                       | 5               | 83.3                      |
| Lincoln, NV      | 53              | (40,73)                | 54              | 1.02              | 1             | (-19,14)             | 19                        | 5               | 500.0                     |
| Lyon, NV         | 735             | (681,800)              | 825             | 1.12              | 90            | (25,144)             | 151                       | 65              | 72.2                      |
| Mineral, NV      | 71              | (55,92)                | 95              | 1.34              | 24            | (3,40)               | 518                       | 5               | 20.8                      |
| Nye, NV          | 904             | (864,1001)             | 931             | 1.03              | 27            | (-70,67)             | 56                        | 71              | 263.0                     |
| Pershing, NV     | 64              | (50,85)                | 61              | 0.95              | -3            | (-24,11)             | -44                       | 11              | NA                        |
| Storey, NV       | 45              | (33,64)                | 41              | 0.91              | -4            | (-23,8)              | -98                       | 5               | NA                        |
| Washoe, NV       | 4249            | (4109,4422)            | 4727            | 1.11              | 478           | (305,618)            | 99                        | 470             | 98.3                      |
| White Pine, NV   | 87              | (64,104)               | 89              | 1.02              | 2             | (-15,25)             | 21                        | 5               | 250.0                     |
| Carson City, NV  | 878             | (809,940)              | 929             | 1.06              | 51            | (-11,120)            | 89                        | 71              | 139.2                     |
| Belknap, NH      | 818             | (771,903)              | 824             | 1.01              | 6             | (-79,53)             | 10                        | 47              | 783.3                     |
| Carroll, NH      | 633             | (583,693)              | 584             | 0.92              | -49           | (-109,1)             | -98                       | 5               | NA                        |
| Cheshire, NH     | 800             | (744,866)              | 773             | 0.97              | -27           | (-93,29)             | -35                       | 11              | NA                        |
| Coos, NH         | 489             | (443,545)              | 479             | 0.98              | -10           | (-66,36)             | -32                       | 21              | NA                        |
| Grafton, NH      | 915             | (860,993)              | 883             | 0.97              | -32           | (-110,23)            | -36                       | 14              | NA                        |

Table C1: Primary Estimates for Each County

| County           | Expected Deaths | Expected Deaths 95% CI | Observed Deaths | Observed/Expected | Excess Deaths | Excess Deaths 95% CI | Excess Deaths Per 100,000 | COVID-19 Deaths | COVID-19 Excess Ratio (%) |
|------------------|-----------------|------------------------|-----------------|-------------------|---------------|----------------------|---------------------------|-----------------|---------------------------|
| Hillsborough, NH | 3737            | (3612,3890)            | 4004            | 1.07              | 267           | (114,392)            | 64                        | 456             | 170.8                     |
| Merrimack, NH    | 1542            | (1462,1631)            | 1532            | 0.99              | -10           | (-99,70)             | -7                        | 77              | NA                        |
| Rockingham, NH   | 2751            | (2657,2886)            | 2924            | 1.06              | 173           | (38,267)             | 55                        | 196             | 113.3                     |
| Strafford, NH    | 1297            | (1235,1391)            | 1219            | 0.94              | -78           | (-172,-16)           | -59                       | 31              | NA                        |
| Sullivan, NH     | 486             | (441,537)              | 476             | 0.98              | -10           | (-61,35)             | -23                       | 5               | NA                        |
| Atlantic, NJ     | 2918            | (2830,3080)            | 3313            | 1.14              | 395           | (233,483)            | 150                       | 338             | 85.6                      |
| Bergen, NJ       | 7446            | (7280,7699)            | 9341            | 1.25              | 1895          | (1642,2061)          | 201                       | 2089            | 110.2                     |
| Burlington, NJ   | 4366            | (4227,4545)            | 4799            | 1.10              | 433           | (254,572)            | 97                        | 629             | 145.3                     |
| Camden, NJ       | 5151            | (5022,5378)            | 5891            | 1.14              | 740           | (513,869)            | 146                       | 807             | 109.1                     |
| Cape May, NJ     | 1338            | (1271,1433)            | 1435            | 1.07              | 97            | (2,164)              | 106                       | 137             | 141.2                     |
| Cumberland, NJ   | 1691            | (1627,1810)            | 1912            | 1.13              | 221           | (102,285)            | 147                       | 202             | 91.4                      |
| Essex, NJ        | 6128            | (5958,6315)            | 8771            | 1.43              | 2643          | (2456,2813)          | 328                       | 2181            | 82.5                      |
| Gloucester, NJ   | 2898            | (2808,3056)            | 3309            | 1.14              | 411           | (253,501)            | 141                       | 389             | 94.6                      |
| Hudson, NJ       | 3763            | (3626,3899)            | 5807            | 1.54              | 2044          | (1908,2181)          | 300                       | 1603            | 78.4                      |
| Hunterdon, NJ    | 956             | (893,1031)             | 1109            | 1.16              | 153           | (78,216)             | 123                       | 163             | 106.5                     |
| Mercer, NJ       | 3013            | (2897,3140)            | 3771            | 1.25              | 758           | (631,874)            | 204                       | 663             | 87.5                      |
| Middlesex, NJ    | 6208            | (6053,6406)            | 7833            | 1.26              | 1625          | (1427,1780)          | 195                       | 1543            | 95.0                      |
| Monmouth, NJ     | 5777            | (5655,6029)            | 6942            | 1.20              | 1165          | (913,1287)           | 188                       | 1016            | 87.2                      |
| Morris, NJ       | 4039            | (3914,4205)            | 4991            | 1.24              | 952           | (786,1077)           | 193                       | 896             | 94.1                      |
| Ocean, NJ        | 7549            | (7321,7753)            | 8673            | 1.15              | 1124          | (920,1352)           | 183                       | 1276            | 113.5                     |
| Passaic, NJ      | 3835            | (3710,3990)            | 5453            | 1.42              | 1618          | (1463,1743)          | 322                       | 1438            | 88.9                      |
| Salem, NJ        | 775             | (720,846)              | 936             | 1.21              | 161           | (90,216)             | 259                       | 99              | 61.5                      |
| Somerset, NJ     | 2550            | (2455,2688)            | 3066            | 1.20              | 516           | (378,611)            | 155                       | 582             | 112.8                     |
| Sussex, NJ       | 1333            | (1275,1437)            | 1553            | 1.17              | 220           | (116,278)            | 157                       | 233             | 105.9                     |
| Union, NJ        | 4050            | (3901,4193)            | 5808            | 1.43              | 1758          | (1615,1907)          | 312                       | 1479            | 84.1                      |
| Warren, NJ       | 1074            | (1003,1148)            | 1252            | 1.17              | 178           | (104,249)            | 169                       | 164             | 92.1                      |
| Bernalillo, NM   | 6192            | (6083,6441)            | 7192            | 1.16              | 1000          | (751,1109)           | 147                       | 655             | 65.5                      |
| Catron, NM       | 47              | (34,64)                | 44              | 0.94              | -3            | (-20,10)             | -83                       | 5               | NA                        |
| Chaves, NM       | 677             | (629,746)              | 849             | 1.25              | 172           | (103,220)            | 270                       | 120             | 69.8                      |
| Cibola, NM       | 265             | (233,305)              | 362             | 1.37              | 97            | (57,129)             | 367                       | 69              | 71.1                      |
| Colfax, NM       | 143             | (119,173)              | 179             | 1.25              | 36            | (6,60)               | 302                       | 31              | 86.1                      |
| Curry, NM        | 430             | (384,468)              | 474             | 1.10              | 44            | (6,90)               | 90                        | 58              | 131.8                     |
| DeBaca, NM       | 25              | (14,36)                | 35              | 1.40              | 10            | (-1,21)              | 582                       | 5               | 50.0                      |
| Dona Ana, NM     | 1702            | (1620,1812)            | 2291            | 1.35              | 589           | (479,671)            | 268                       | 340             | 57.7                      |
| Eddy, NM         | 610             | (563,674)              | 636             | 1.04              | 26            | (-38,73)             | 44                        | 91              | 350.0                     |
| Grant, NM        | 350             | (323,404)              | 437             | 1.25              | 87            | (33,114)             | 326                       | 25              | 28.7                      |
| Guadalupe, NM    | 57              | (43,77)                | 60              | 1.05              | 3             | (-17,17)             | 71                        | 5               | 166.7                     |
| Hidalgo, NM      | 62              | (47,82)                | 63              | 1.02              | 1             | (-19,16)             | 24                        | 5               | 500.0                     |
| Lea, NM          | 574             | (530,640)              | 714             | 1.24              | 140           | (74,184)             | 198                       | 139             | 99.3                      |
| Lincoln, NM      | 266             | (235,308)              | 238             | 0.89              | -28           | (-70,3)              | -142                      | 21              | NA                        |
| Los Alamos, NM   | 141             | (114,167)              | 141             | 1.00              | 0             | (-26,27)             | 0                         | 5               | Inf                       |
| Luna, NM         | 317             | (280,352)              | 393             | 1.24              | 76            | (41,113)             | 322                       | 60              | 78.9                      |
| McKinley, NM     | 745             | (701,820)              | 1192            | 1.60              | 447           | (372,491)            | 624                       | 387             | 86.6                      |
| Mora, NM         | 44              | (31,59)                | 47              | 1.07              | 3             | (-12,16)             | 68                        | 5               | 166.7                     |
| Otero, NM        | 678             | (619,727)              | 756             | 1.12              | 78            | (29,137)             | 115                       | 47              | 60.3                      |
| Quay, NM         | 122             | (98,149)               | 163             | 1.34              | 41            | (14,65)              | 504                       | 10              | 24.4                      |
| Rio Arriba, NM   | 448             | (405,501)              | 513             | 1.15              | 65            | (12,108)             | 168                       | 50              | 76.9                      |
| Roosevelt, NM    | 159             | (134,192)              | 190             | 1.19              | 31            | (-2,56)              | 168                       | 42              | 135.5                     |
| Sandoval, NM     | 1331            | (1276,1436)            | 1431            | 1.08              | 100           | (-5,155)             | 67                        | 158             | 158.0                     |
| San Juan, NM     | 1182            | (1138,1289)            | 1538            | 1.30              | 356           | (249,400)            | 293                       | 345             | 96.9                      |
| San Miguel, NM   | 310             | (272,352)              | 303             | 0.98              | -7            | (-49,31)             | -26                       | 10              | NA                        |
| Santa Fe, NM     | 1299            | (1238,1396)            | 1459            | 1.12              | 160           | (63,221)             | 106                       | 92              | 57.5                      |
| Sierra, NM       | 271             | (231,300)              | 305             | 1.13              | 34            | (5,74)               | 317                       | 43              | 126.5                     |
| Socorro, NM      | 170             | (145,202)              | 230             | 1.35              | 60            | (28,85)              | 365                       | 48              | 80.0                      |
| Taos, NM         | 351             | (307,391)              | 406             | 1.16              | 55            | (15,99)              | 168                       | 45              | 81.8                      |
| Torrance, NM     | 170             | (148,205)              | 181             | 1.06              | 11            | (-24,33)             | 71                        | 11              | 100.0                     |
| Union, NM        | 41              | (27,56)                | 60              | 1.46              | 19            | (4,33)               | 476                       | 5               | 26.3                      |
| Valencia, NM     | 770             | (720,845)              | 853             | 1.11              | 83            | (8,133)              | 107                       | 75              | 90.4                      |
| Albany, NY       | 2800            | (2689,2928)            | 3142            | 1.12              | 342           | (214,453)            | 112                       | 243             | 71.1                      |
| Allegany, NY     | 508             | (458,562)              | 554             | 1.09              | 46            | (-8,96)              | 100                       | 72              | 156.5                     |
| Bronx, NY        | 9693            | (9503,9996)            | 15933           | 1.64              | 6240          | (5937,6430)          | 441                       | 4631            | 74.2                      |
| Broome, NY       | 2139            | (2052,2262)            | 2406            | 1.12              | 267           | (144,354)            | 141                       | 242             | 90.6                      |
| Cattaraugus, NY  | 894             | (826,961)              | 936             | 1.05              | 42            | (-25,110)            | 55                        | 57              | 135.7                     |
| Cayuga, NY       | 794             | (725,845)              | 897             | 1.13              | 103           | (52,172)             | 135                       | 31              | 30.1                      |

Table C1: Primary Estimates for Each County

| County           | Expected Deaths | Expected Deaths 95% CI | Observed Deaths | Observed/Expected | Excess Deaths | Excess Deaths 95% CI | Excess Deaths Per 100,000 | COVID-19 Deaths | COVID-19 Excess Ratio (%) |
|------------------|-----------------|------------------------|-----------------|-------------------|---------------|----------------------|---------------------------|-----------------|---------------------------|
| Chautauqua, NY   | 1573            | (1479,1665)            | 1568            | 1.00              | -5            | (-97,89)             | -4                        | 44              | NA                        |
| Chemung, NY      | 1076            | (1021,1170)            | 1115            | 1.04              | 39            | (-55,94)             | 47                        | 115             | 294.9                     |
| Chenango, NY     | 619             | (564,672)              | 627             | 1.01              | 8             | (-45,63)             | 17                        | 34              | 425.0                     |
| Clinton, NY      | 763             | (716,838)              | 806             | 1.06              | 43            | (-32,90)             | 53                        | 10              | 23.3                      |
| Columbia, NY     | 696             | (634,751)              | 696             | 1.00              | 0             | (-55,62)             | 0                         | 50              | Inf                       |
| Cortland, NY     | 463             | (417,513)              | 528             | 1.14              | 65            | (15,111)             | 136                       | 32              | 49.2                      |
| Delaware, NY     | 540             | (499,607)              | 590             | 1.09              | 50            | (-17,91)             | 115                       | 23              | 46.0                      |
| Dutchess, NY     | 2686            | (2599,2834)            | 2947            | 1.10              | 261           | (113,348)            | 89                        | 291             | 111.5                     |
| Erie, NY         | 9944            | (9658,10176)           | 11162           | 1.12              | 1218          | (986,1504)           | 132                       | 1300            | 106.7                     |
| Essex, NY        | 457             | (422,514)              | 471             | 1.03              | 14            | (-43,49)             | 38                        | 13              | 92.9                      |
| Franklin, NY     | 472             | (423,518)              | 487             | 1.03              | 15            | (-31,64)             | 30                        | 12              | 80.0                      |
| Fulton, NY       | 604             | (558,668)              | 680             | 1.13              | 76            | (12,122)             | 143                       | 52              | 68.4                      |
| Genesee, NY      | 648             | (606,718)              | 726             | 1.12              | 78            | (8,120)              | 137                       | 63              | 80.8                      |
| Greene, NY       | 555             | (501,601)              | 546             | 0.98              | -9            | (-55,45)             | -19                       | 30              | NA                        |
| Hamilton, NY     | 66              | (51,88)                | 72              | 1.09              | 6             | (-16,21)             | 138                       | 5               | 83.3                      |
| Herkimer, NY     | 703             | (628,749)              | 715             | 1.02              | 12            | (-34,87)             | 20                        | 42              | 350.0                     |
| Jefferson, NY    | 950             | (899,1031)             | 965             | 1.02              | 15            | (-66,66)             | 14                        | 13              | 86.7                      |
| Kings, NY        | 15688           | (15398,16047)          | 24874           | 1.59              | 9186          | (8827,9476)          | 359                       | 7138            | 77.7                      |
| Lewis, NY        | 267             | (237,308)              | 231             | 0.87              | -36           | (-77,-6)             | -137                      | 10              | NA                        |
| Livingston, NY   | 600             | (556,667)              | 590             | 0.98              | -10           | (-77,34)             | -16                       | 36              | NA                        |
| Madison, NY      | 603             | (547,657)              | 725             | 1.20              | 122           | (68,178)             | 173                       | 74              | 60.7                      |
| Monroe, NY       | 6931            | (6788,7176)            | 7791            | 1.12              | 860           | (615,1003)           | 116                       | 729             | 84.8                      |
| Montgomery, NY   | 598             | (539,645)              | 664             | 1.11              | 66            | (19,125)             | 133                       | 39              | 59.1                      |
| Nassau, NY       | 11019           | (10750,11255)          | 14273           | 1.30              | 3254          | (3018,3523)          | 239                       | 3004            | 92.3                      |
| New York, NY     | 10036           | (9768,10294)           | 14013           | 1.40              | 3977          | (3719,4245)          | 245                       | 3073            | 77.3                      |
| Niagara, NY      | 2470            | (2365,2583)            | 2808            | 1.14              | 338           | (225,443)            | 161                       | 262             | 77.5                      |
| Oneida, NY       | 2650            | (2546,2782)            | 2942            | 1.11              | 292           | (160,396)            | 128                       | 272             | 93.2                      |
| Onondaga, NY     | 4493            | (4352,4673)            | 5119            | 1.14              | 626           | (446,767)            | 136                       | 527             | 84.2                      |
| Ontario, NY      | 1120            | (1052,1200)            | 1122            | 1.00              | 2             | (-78,70)             | 2                         | 80              | 4000.0                    |
| Orange, NY       | 2878            | (2749,2989)            | 3516            | 1.22              | 638           | (527,767)            | 165                       | 628             | 98.4                      |
| Orleans, NY      | 435             | (394,491)              | 496             | 1.14              | 61            | (5,102)              | 151                       | 58              | 95.1                      |
| Oswego, NY       | 1145            | (1083,1244)            | 1181            | 1.03              | 36            | (-63,98)             | 31                        | 60              | 166.7                     |
| Otsego, NY       | 647             | (596,711)              | 691             | 1.07              | 44            | (-20,95)             | 74                        | 21              | 47.7                      |
| Putnam, NY       | 741             | (679,796)              | 896             | 1.21              | 155           | (100,217)            | 157                       | 129             | 83.2                      |
| Queens, NY       | 14497           | (14260,14846)          | 23062           | 1.59              | 8565          | (8216,8802)          | 382                       | 7040            | 82.2                      |
| Rensselaer, NY   | 1495            | (1415,1586)            | 1662            | 1.11              | 167           | (76,247)             | 105                       | 87              | 52.1                      |
| Richmond, NY     | 3895            | (3772,4049)            | 5041            | 1.29              | 1146          | (992,1269)           | 240                       | 1174            | 102.4                     |
| Rockland, NY     | 2309            | (2210,2430)            | 3221            | 1.39              | 912           | (791,1011)           | 279                       | 873             | 95.7                      |
| St. Lawrence, NY | 1015            | (964,1107)             | 1117            | 1.10              | 102           | (10,153)             | 95                        | 49              | 48.0                      |
| Saratoga, NY     | 2057            | (1958,2176)            | 2051            | 1.00              | -6            | (-125,93)            | -3                        | 70              | NA                        |
| Schenectady, NY  | 1627            | (1530,1714)            | 1746            | 1.07              | 119           | (32,216)             | 76                        | 97              | 81.5                      |
| Schoharie, NY    | 324             | (285,365)              | 317             | 0.98              | -7            | (-48,32)             | -23                       | 5               | NA                        |
| Schuyler, NY     | 211             | (186,248)              | 221             | 1.05              | 10            | (-27,35)             | 56                        | 12              | 120.0                     |
| Seneca, NY       | 404             | (359,447)              | 387             | 0.96              | -17           | (-60,28)             | -50                       | 32              | NA                        |
| Steuben, NY      | 1071            | (1013,1163)            | 1172            | 1.09              | 101           | (9,159)              | 106                       | 132             | 130.7                     |
| Suffolk, NY      | 12973           | (12779,13366)          | 15765           | 1.22              | 2792          | (2399,2986)          | 189                       | 2991            | 107.1                     |
| Sullivan, NY     | 753             | (705,823)              | 888             | 1.18              | 135           | (65,183)             | 177                       | 71              | 52.6                      |
| Tioga, NY        | 492             | (446,552)              | 579             | 1.18              | 87            | (27,133)             | 180                       | 74              | 85.1                      |
| Tompkins, NY     | 729             | (673,787)              | 704             | 0.97              | -25           | (-83,31)             | -24                       | 29              | NA                        |
| Ulster, NY       | 1845            | (1758,1944)            | 1992            | 1.08              | 147           | (48,234)             | 82                        | 161             | 109.5                     |
| Warren, NY       | 786             | (731,852)              | 790             | 1.01              | 4             | (-62,59)             | 6                         | 47              | 1175.0                    |
| Washington, NY   | 678             | (637,754)              | 755             | 1.11              | 77            | (1,118)              | 127                       | 17              | 22.1                      |
| Wayne, NY        | 940             | (882,1021)             | 969             | 1.03              | 29            | (-52,87)             | 32                        | 56              | 193.1                     |
| Westchester, NY  | 7251            | (7069,7473)            | 9629            | 1.33              | 2378          | (2156,2560)          | 247                       | 2050            | 86.2                      |
| Wyoming, NY      | 396             | (353,440)              | 450             | 1.14              | 54            | (10,97)              | 136                       | 27              | 50.0                      |
| Yates, NY        | 287             | (259,336)              | 306             | 1.07              | 19            | (-30,47)             | 77                        | 17              | 89.5                      |
| Alamance, NC     | 1841            | (1746,1947)            | 2037            | 1.11              | 196           | (90,291)             | 114                       | 158             | 80.6                      |
| Alexander, NC    | 438             | (392,484)              | 495             | 1.13              | 57            | (11,103)             | 151                       | 47              | 82.5                      |
| Alleghany, NC    | 162             | (138,195)              | 157             | 0.97              | -5            | (-38,19)             | -44                       | 5               | NA                        |
| Anson, NC        | 345             | (298,381)              | 340             | 0.99              | -5            | (-41,42)             | -20                       | 36              | NA                        |
| Ashe, NC         | 357             | (316,402)              | 398             | 1.11              | 41            | (-4,82)              | 148                       | 40              | 97.6                      |
| Avery, NC        | 222             | (196,262)              | 241             | 1.09              | 19            | (-21,45)             | 109                       | 18              | 94.7                      |
| Beaufort, NC     | 651             | (594,705)              | 667             | 1.02              | 16            | (-38,73)             | 34                        | 68              | 425.0                     |
| Bertie, NC       | 249             | (222,290)              | 303             | 1.22              | 54            | (13,81)              | 291                       | 41              | 75.9                      |

Table C1: Primary Estimates for Each County

| County          | Expected Deaths | Expected Deaths 95% CI | Observed Deaths | Observed/Expected | Excess Deaths | Excess Deaths 95% CI | Excess Deaths Per 100,000 | COVID-19 Deaths | COVID-19 to Excess Ratio (%) |
|-----------------|-----------------|------------------------|-----------------|-------------------|---------------|----------------------|---------------------------|-----------------|------------------------------|
| Bladen, NC      | 444             | (397,492)              | 491             | 1.11              | 47            | (-1,94)              | 144                       | 28              | 59.6                         |
| Brunswick, NC   | 1738            | (1658,1842)            | 1777            | 1.02              | 39            | (-65,119)            | 26                        | 88              | 225.6                        |
| Buncombe, NC    | 2830            | (2684,2936)            | 3025            | 1.07              | 195           | (89,341)             | 74                        | 195             | 100.0                        |
| Burke, NC       | 1073            | (1002,1154)            | 1203            | 1.12              | 130           | (49,201)             | 143                       | 97              | 74.6                         |
| Cabarrus, NC    | 1670            | (1563,1739)            | 1877            | 1.12              | 207           | (138,314)            | 94                        | 143             | 69.1                         |
| Caldwell, NC    | 1038            | (988,1127)             | 1156            | 1.11              | 118           | (29,168)             | 144                       | 118             | 100.0                        |
| Camden, NC      | 100             | (81,123)               | 114             | 1.14              | 14            | (-9,33)              | 127                       | 5               | 35.7                         |
| Carteret, NC    | 929             | (880,1019)             | 881             | 0.95              | -48           | (-138,1)             | -68                       | 35              | NA                           |
| Caswell, NC     | 288             | (261,336)              | 335             | 1.16              | 47            | (-1,74)              | 206                       | 18              | 38.3                         |
| Catawba, NC     | 1794            | (1681,1876)            | 2008            | 1.12              | 214           | (132,327)            | 134                       | 190             | 88.8                         |
| Chatham, NC     | 781             | (728,848)              | 842             | 1.08              | 61            | (-6,114)             | 79                        | 58              | 95.1                         |
| Cherokee, NC    | 419             | (382,470)              | 427             | 1.02              | 8             | (-43,45)             | 27                        | 31              | 387.5                        |
| Chowan, NC      | 210             | (185,252)              | 221             | 1.05              | 11            | (-31,36)             | 79                        | 25              | 227.3                        |
| Clay, NC        | 177             | (147,210)              | 139             | 0.79              | -38           | (-71,-8)             | -333                      | 5               | NA                           |
| Cleveland, NC   | 1320            | (1246,1406)            | 1484            | 1.12              | 164           | (78,238)             | 167                       | 172             | 104.9                        |
| Columbus, NC    | 733             | (690,814)              | 888             | 1.21              | 155           | (74,198)             | 282                       | 91              | 58.7                         |
| Craven, NC      | 1211            | (1142,1298)            | 1359            | 1.12              | 148           | (61,217)             | 143                       | 105             | 70.9                         |
| Cumberland, NC  | 2770            | (2682,2918)            | 3054            | 1.10              | 284           | (136,372)            | 85                        | 158             | 55.6                         |
| Currituck, NC   | 236             | (201,269)              | 303             | 1.28              | 67            | (34,102)             | 234                       | 14              | 20.9                         |
| Dare, NC        | 401             | (365,453)              | 382             | 0.95              | -19           | (-71,17)             | -51                       | 5               | NA                           |
| Davidson, NC    | 1968            | (1868,2074)            | 2205            | 1.12              | 237           | (131,337)            | 140                       | 148             | 62.4                         |
| Davie, NC       | 522             | (473,571)              | 523             | 1.00              | 1             | (-48,50)             | 2                         | 35              | 3500.0                       |
| Duplin, NC      | 563             | (507,616)              | 704             | 1.25              | 141           | (88,197)             | 240                       | 81              | 57.4                         |
| Durham, NC      | 2211            | (2112,2329)            | 2432            | 1.10              | 221           | (103,320)            | 68                        | 153             | 69.2                         |
| Edgecombe, NC   | 745             | (704,828)              | 804             | 1.08              | 59            | (-24,100)            | 117                       | 90              | 152.5                        |
| Forsyth, NC     | 3633            | (3507,3777)            | 3964            | 1.09              | 331           | (187,457)            | 86                        | 261             | 78.9                         |
| Franklin, NC    | 697             | (647,762)              | 705             | 1.01              | 8             | (-57,58)             | 11                        | 47              | 587.5                        |
| Gaston, NC      | 2533            | (2431,2662)            | 2785            | 1.10              | 252           | (123,354)            | 110                       | 249             | 98.8                         |
| Gates, NC       | 152             | (129,185)              | 142             | 0.93              | -10           | (-43,13)             | -86                       | 22              | NA                           |
| Graham, NC      | 108             | (90,137)               | 136             | 1.26              | 28            | (-1,46)              | 334                       | 11              | 39.3                         |
| Granville, NC   | 618             | (568,674)              | 697             | 1.13              | 79            | (23,129)             | 128                       | 50              | 63.3                         |
| Greene, NC      | 222             | (193,256)              | 247             | 1.11              | 25            | (-9,54)              | 119                       | 28              | 112.0                        |
| Guilford, NC    | 4856            | (4741,5070)            | 5160            | 1.06              | 304           | (90,419)             | 56                        | 391             | 128.6                        |
| Halifax, NC     | 681             | (645,760)              | 817             | 1.20              | 136           | (57,172)             | 277                       | 57              | 41.9                         |
| Harnett, NC     | 1115            | (1044,1196)            | 1230            | 1.10              | 115           | (34,186)             | 83                        | 103             | 89.6                         |
| Haywood, NC     | 903             | (850,978)              | 956             | 1.06              | 53            | (-22,106)            | 83                        | 77              | 145.3                        |
| Henderson, NC   | 1486            | (1388,1562)            | 1530            | 1.03              | 44            | (-32,142)            | 37                        | 108             | 245.5                        |
| Hertford, NC    | 272             | (243,320)              | 365             | 1.34              | 93            | (45,122)             | 402                       | 54              | 58.1                         |
| Hoke, NC        | 379             | (343,429)              | 470             | 1.24              | 91            | (41,127)             | 162                       | 50              | 54.9                         |
| Hyde, NC        | 73              | (58,95)                | 59              | 0.81              | -14           | (-36,1)              | -272                      | 5               | NA                           |
| Iredell, NC     | 1657            | (1564,1750)            | 1871            | 1.13              | 214           | (121,307)            | 116                       | 140             | 65.4                         |
| Jackson, NC     | 425             | (380,473)              | 454             | 1.07              | 29            | (-19,74)             | 67                        | 34              | 117.2                        |
| Johnston, NC    | 1698            | (1608,1786)            | 1818            | 1.07              | 120           | (32,210)             | 56                        | 134             | 111.7                        |
| Jones, NC       | 124             | (102,150)              | 166             | 1.34              | 42            | (16,64)              | 433                       | 22              | 52.4                         |
| Lee, NC         | 658             | (596,706)              | 746             | 1.13              | 88            | (40,150)             | 139                       | 51              | 58.0                         |
| Lenoir, NC      | 759             | (703,828)              | 895             | 1.18              | 136           | (67,192)             | 249                       | 87              | 64.0                         |
| Lincoln, NC     | 895             | (821,958)              | 1012            | 1.13              | 117           | (54,191)             | 135                       | 82              | 70.1                         |
| McDowell, NC    | 562             | (516,623)              | 628             | 1.12              | 66            | (5,112)              | 143                       | 70              | 106.1                        |
| Macon, NC       | 518             | (471,570)              | 536             | 1.03              | 18            | (-34,65)             | 49                        | 22              | 122.2                        |
| Madison, NC     | 292             | (260,337)              | 282             | 0.97              | -10           | (-55,22)             | -45                       | 14              | NA                           |
| Martin, NC      | 318             | (282,356)              | 400             | 1.26              | 82            | (44,118)             | 365                       | 34              | 41.5                         |
| Mecklenburg, NC | 6753            | (6554,6931)            | 7676            | 1.14              | 923           | (745,1122)           | 82                        | 683             | 74.0                         |
| Mitchell, NC    | 247             | (210,281)              | 246             | 1.00              | -1            | (-35,36)             | -7                        | 26              | NA                           |
| Montgomery, NC  | 332             | (301,382)              | 366             | 1.10              | 34            | (-16,65)             | 125                       | 41              | 120.6                        |
| Moore, NC       | 1202            | (1114,1278)            | 1321            | 1.10              | 119           | (43,207)             | 117                       | 112             | 94.1                         |
| Nash, NC        | 1166            | (1114,1262)            | 1235            | 1.06              | 69            | (-27,121)            | 73                        | 128             | 185.5                        |
| New Hanover, NC | 2143            | (2045,2259)            | 2332            | 1.09              | 189           | (73,287)             | 79                        | 92              | 48.7                         |
| Northampton, NC | 270             | (235,305)              | 350             | 1.30              | 80            | (45,115)             | 416                       | 48              | 60.0                         |
| Onslow, NC      | 1425            | (1358,1526)            | 1429            | 1.00              | 4             | (-97,71)             | 2                         | 82              | 2050.0                       |
| Orange, NC      | 867             | (805,939)              | 904             | 1.04              | 37            | (-35,99)             | 25                        | 58              | 156.8                        |
| Pamlico, NC     | 195             | (168,229)              | 187             | 0.96              | -8            | (-42,19)             | -63                       | 5               | NA                           |
| Pasquotank, NC  | 456             | (412,508)              | 519             | 1.14              | 63            | (11,107)             | 158                       | 45              | 71.4                         |
| Pender, NC      | 671             | (616,737)              | 679             | 1.01              | 8             | (-58,63)             | 12                        | 31              | 387.5                        |
| Perquimans, NC  | 180             | (151,210)              | 223             | 1.24              | 43            | (13,72)              | 322                       | 17              | 39.5                         |

Table C1: Primary Estimates for Each County

| County            | Expected Deaths | Expected Deaths 95% CI | Observed Deaths | Observed/Expected | Excess Deaths | Excess Deaths 95% CI | Excess Deaths Per 100,000 | COVID-19 Deaths | COVID-19 Excess Ratio (%) |
|-------------------|-----------------|------------------------|-----------------|-------------------|---------------|----------------------|---------------------------|-----------------|---------------------------|
| Person, NC        | 491             | (446,544)              | 533             | 1.09              | 42            | (-11,87)             | 106                       | 27              | 64.3                      |
| Pitt, NC          | 1386            | (1319,1486)            | 1643            | 1.19              | 257           | (157,324)            | 141                       | 139             | 54.1                      |
| Polk, NC          | 327             | (293,370)              | 319             | 0.98              | -8            | (-51,26)             | -38                       | 22              | NA                        |
| Randolph, NC      | 1704            | (1626,1821)            | 1866            | 1.10              | 162           | (45,240)             | 113                       | 148             | 91.4                      |
| Richmond, NC      | 594             | (544,648)              | 655             | 1.10              | 61            | (7,111)              | 136                       | 57              | 93.4                      |
| Robeson, NC       | 1531            | (1474,1650)            | 1753            | 1.15              | 222           | (103,279)            | 170                       | 202             | 91.0                      |
| Rockingham, NC    | 1228            | (1167,1326)            | 1445            | 1.18              | 217           | (119,278)            | 240                       | 115             | 53.0                      |
| Rowan, NC         | 1735            | (1628,1831)            | 1971            | 1.14              | 236           | (140,343)            | 165                       | 183             | 77.5                      |
| Rutherford, NC    | 909             | (835,972)              | 1048            | 1.15              | 139           | (76,213)             | 206                       | 124             | 89.2                      |
| Sampson, NC       | 762             | (705,825)              | 759             | 1.00              | -3            | (-66,54)             | -5                        | 62              | NA                        |
| Scotland, NC      | 417             | (380,469)              | 570             | 1.37              | 153           | (101,190)            | 449                       | 62              | 40.5                      |
| Stanly, NC        | 774             | (708,831)              | 853             | 1.10              | 79            | (22,145)             | 125                       | 84              | 106.3                     |
| Stokes, NC        | 621             | (570,683)              | 651             | 1.05              | 30            | (-32,81)             | 67                        | 37              | 123.3                     |
| Surry, NC         | 1025            | (973,1116)             | 1089            | 1.06              | 64            | (-27,116)            | 89                        | 89              | 139.1                     |
| Swain, NC         | 209             | (183,249)              | 254             | 1.22              | 45            | (5,71)               | 317                       | 10              | 22.2                      |
| Transylvania, NC  | 446             | (406,502)              | 446             | 1.00              | 0             | (-56,40)             | 0                         | 16              | Inf                       |
| Tyrrell, NC       | 46              | (30,59)                | 50              | 1.09              | 4             | (-9,20)              | 99                        | 5               | 125.0                     |
| Union, NC         | 1631            | (1548,1725)            | 1677            | 1.03              | 46            | (-48,129)            | 19                        | 128             | 278.3                     |
| Vance, NC         | 584             | (531,643)              | 669             | 1.15              | 85            | (26,138)             | 188                       | 78              | 91.8                      |
| Wake, NC          | 6306            | (6154,6510)            | 6693            | 1.06              | 387           | (183,539)            | 34                        | 504             | 130.2                     |
| Warren, NC        | 283             | (249,322)              | 310             | 1.10              | 27            | (-12,61)             | 137                       | 15              | 55.6                      |
| Washington, NC    | 171             | (148,206)              | 196             | 1.15              | 25            | (-10,48)             | 217                       | 13              | 52.0                      |
| Watauga, NC       | 381             | (343,429)              | 438             | 1.15              | 57            | (9,95)               | 99                        | 25              | 43.9                      |
| Wayne, NC         | 1367            | (1327,1499)            | 1543            | 1.13              | 176           | (44,216)             | 143                       | 165             | 93.8                      |
| Wilkes, NC        | 906             | (850,985)              | 985             | 1.09              | 79            | (0,135)              | 115                       | 88              | 111.4                     |
| Wilson, NC        | 958             | (908,1046)             | 1126            | 1.18              | 168           | (80,218)             | 207                       | 129             | 76.8                      |
| Yadkin, NC        | 481             | (435,533)              | 520             | 1.08              | 39            | (-13,85)             | 104                       | 44              | 112.8                     |
| Yancey, NC        | 240             | (211,279)              | 273             | 1.14              | 33            | (-6,62)              | 180                       | 22              | 66.7                      |
| Adams, ND         | 33              | (21,48)                | 31              | 0.94              | -2            | (-17,10)             | -90                       | 5               | NA                        |
| Barnes, ND        | 131             | (107,158)              | 175             | 1.34              | 44            | (17,68)              | 428                       | 30              | 68.2                      |
| Benson, ND        | 63              | (47,80)                | 102             | 1.62              | 39            | (22,55)              | 556                       | 19              | 48.7                      |
| Bottineau, ND     | 86              | (69,110)               | 80              | 0.93              | -6            | (-30,11)             | -97                       | 22              | NA                        |
| Bowman, ND        | 29              | (18,41)                | 48              | 1.66              | 19            | (7,30)               | 650                       | 5               | 26.3                      |
| Burke, ND         | 15              | (7,24)                 | 22              | 1.47              | 7             | (-2,15)              | 345                       | 5               | 71.4                      |
| Burleigh, ND      | 743             | (685,814)              | 1021            | 1.37              | 278           | (207,336)            | 291                       | 185             | 66.5                      |
| Cass, ND          | 1286            | (1224,1385)            | 1432            | 1.11              | 146           | (47,208)             | 77                        | 176             | 120.5                     |
| Cavalier, ND      | 49              | (36,67)                | 54              | 1.10              | 5             | (-13,18)             | 128                       | 5               | 100.0                     |
| Dickey, ND        | 71              | (50,86)                | 94              | 1.32              | 23            | (8,44)               | 468                       | 37              | 160.9                     |
| Divide, ND        | 28              | (17,41)                | 18              | 0.64              | -10           | (-23,1)              | -439                      | 0               | 0.0                       |
| Dunn, ND          | 30              | (19,42)                | 38              | 1.27              | 8             | (-4,19)              | 180                       | 5               | 62.5                      |
| Eddy, ND          | 42              | (29,58)                | 40              | 0.95              | -2            | (-18,11)             | -87                       | 5               | NA                        |
| Emmons, ND        | 45              | (29,59)                | 62              | 1.38              | 17            | (3,33)               | 524                       | 12              | 70.6                      |
| Foster, ND        | 40              | (26,53)                | 58              | 1.45              | 18            | (5,32)               | 575                       | 21              | 116.7                     |
| Golden Valley, ND | 9               | (3,16)                 | 17              | 1.89              | 8             | (1,14)               | 461                       | 0               | 0.0                       |
| Grand Forks, ND   | 547             | (504,608)              | 584             | 1.07              | 37            | (-24,80)             | 52                        | 72              | 194.6                     |
| Grant, ND         | 32              | (21,45)                | 41              | 1.28              | 9             | (-4,20)              | 381                       | 5               | 55.6                      |
| Griggs, ND        | 39              | (25,52)                | 39              | 1.00              | 0             | (-13,14)             | 0                         | 5               | Inf                       |
| Hettinger, ND     | 25              | (16,38)                | 48              | 1.92              | 23            | (10,32)              | 890                       | 5               | 21.7                      |
| Kidder, ND        | 21              | (12,33)                | 28              | 1.33              | 7             | (-5,16)              | 293                       | 5               | 71.4                      |
| LaMoure, ND       | 42              | (29,55)                | 56              | 1.33              | 14            | (1,27)               | 351                       | 15              | 107.1                     |
| Logan, ND         | 27              | (15,37)                | 27              | 1.00              | 0             | (-10,12)             | 0                         | 5               | Inf                       |
| McHenry, ND       | 62              | (45,81)                | 89              | 1.44              | 27            | (8,44)               | 477                       | 14              | 51.9                      |
| McIntosh, ND      | 47              | (36,66)                | 64              | 1.36              | 17            | (-2,28)              | 669                       | 5               | 29.4                      |
| McKenzie, ND      | 64              | (46,81)                | 108             | 1.69              | 44            | (27,62)              | 282                       | 15              | 34.1                      |
| McLean, ND        | 106             | (87,136)               | 137             | 1.29              | 31            | (1,50)               | 332                       | 28              | 90.3                      |
| Mercer, ND        | 76              | (57,95)                | 71              | 0.93              | -5            | (-24,14)             | -63                       | 5               | NA                        |
| Morton, ND        | 317             | (288,363)              | 390             | 1.23              | 73            | (27,102)             | 235                       | 64              | 87.7                      |
| Mountrail, ND     | 95              | (75,118)               | 126             | 1.33              | 31            | (8,51)               | 306                       | 20              | 64.5                      |
| Nelson, ND        | 52              | (36,69)                | 60              | 1.15              | 8             | (-9,24)              | 287                       | 12              | 150.0                     |
| Oliver, ND        | 11              | (5,18)                 | 18              | 1.64              | 7             | (0,13)               | 353                       | 5               | 71.4                      |
| Pembina, ND       | 85              | (70,111)               | 85              | 1.00              | 0             | (-26,15)             | 0                         | 11              | Inf                       |
| Pierce, ND        | 47              | (30,60)                | 65              | 1.38              | 18            | (5,35)               | 448                       | 22              | 122.2                     |
| Ramsey, ND        | 135             | (110,158)              | 174             | 1.29              | 39            | (16,64)              | 343                       | 23              | 59.0                      |
| Ransom, ND        | 83              | (66,106)               | 91              | 1.10              | 8             | (-15,25)             | 156                       | 12              | 150.0                     |

Table C1: Primary Estimates for Each County

| County         | Expected Deaths | Expected Deaths 95% CI | Observed Deaths | Observed/Expected | Excess Deaths | Excess Deaths 95% CI | Excess Deaths Per 100,000 | COVID-19 Deaths | COVID-19 to Excess Ratio (%) |
|----------------|-----------------|------------------------|-----------------|-------------------|---------------|----------------------|---------------------------|-----------------|------------------------------|
| Renville, ND   | 30              | (21,47)                | 36              | 1.20              | 6             | (-11,15)             | 271                       | 14              | 233.3                        |
| Richland, ND   | 157             | (133,187)              | 162             | 1.03              | 5             | (-25,29)             | 31                        | 21              | 420.0                        |
| Rolette, ND    | 127             | (104,152)              | 180             | 1.42              | 53            | (28,76)              | 385                       | 25              | 47.2                         |
| Sargent, ND    | 37              | (25,52)                | 49              | 1.32              | 12            | (-3,24)              | 310                       | 5               | 41.7                         |
| Sioux, ND      | 41              | (27,55)                | 58              | 1.41              | 17            | (3,31)               | 403                       | 11              | 64.7                         |
| Stark, ND      | 234             | (203,269)              | 297             | 1.27              | 63            | (28,94)              | 194                       | 50              | 79.4                         |
| Steele, ND     | 17              | (9,26)                 | 19              | 1.12              | 2             | (-7,10)              | 106                       | 5               | 250.0                        |
| Stutsman, ND   | 235             | (205,275)              | 286             | 1.22              | 51            | (11,81)              | 248                       | 65              | 127.5                        |
| Towner, ND     | 26              | (16,38)                | 37              | 1.42              | 11            | (-1,21)              | 532                       | 11              | 100.0                        |
| Traill, ND     | 93              | (71,110)               | 113             | 1.22              | 20            | (3,42)               | 248                       | 15              | 75.0                         |
| Walsh, ND      | 145             | (119,172)              | 149             | 1.03              | 4             | (-23,30)             | 38                        | 23              | 575.0                        |
| Ward, ND       | 452             | (412,512)              | 726             | 1.61              | 274           | (214,314)            | 411                       | 168             | 61.3                         |
| Wells, ND      | 59              | (45,80)                | 67              | 1.14              | 8             | (-13,22)             | 209                       | 5               | 62.5                         |
| Williams, ND   | 226             | (194,258)              | 252             | 1.12              | 26            | (-6,58)              | 66                        | 34              | 130.8                        |
| Adams, OH      | 382             | (349,435)              | 415             | 1.09              | 33            | (-20,66)             | 120                       | 32              | 97.0                         |
| Allen, OH      | 1200            | (1139,1301)            | 1373            | 1.14              | 173           | (72,234)             | 169                       | 189             | 109.2                        |
| Ashland, OH    | 617             | (572,682)              | 684             | 1.11              | 67            | (2,112)              | 124                       | 74              | 110.4                        |
| Ashtabula, OH  | 1265            | (1200,1358)            | 1312            | 1.04              | 47            | (-46,112)            | 48                        | 144             | 306.4                        |
| Athens, OH     | 497             | (450,547)              | 589             | 1.19              | 92            | (42,139)             | 141                       | 30              | 32.6                         |
| Auglaize, OH   | 494             | (451,544)              | 627             | 1.27              | 133           | (83,176)             | 290                       | 80              | 60.2                         |
| Belmont, OH    | 882             | (822,954)              | 1018            | 1.15              | 136           | (64,196)             | 204                       | 104             | 76.5                         |
| Brown, OH      | 586             | (539,642)              | 646             | 1.10              | 60            | (4,107)              | 137                       | 34              | 56.7                         |
| Butler, OH     | 3702            | (3582,3866)            | 4218            | 1.14              | 516           | (352,636)            | 134                       | 439             | 85.1                         |
| Carroll, OH    | 348             | (320,402)              | 402             | 1.16              | 54            | (0,82)               | 203                       | 34              | 63.0                         |
| Champaign, OH  | 437             | (393,481)              | 507             | 1.16              | 70            | (26,114)             | 181                       | 37              | 52.9                         |
| Clark, OH      | 1842            | (1738,1933)            | 2083            | 1.13              | 241           | (150,345)            | 180                       | 233             | 96.7                         |
| Clermont, OH   | 2027            | (1939,2130)            | 2230            | 1.10              | 203           | (100,291)            | 98                        | 156             | 76.8                         |
| Clinton, OH    | 475             | (433,532)              | 553             | 1.16              | 78            | (21,120)             | 185                       | 48              | 61.5                         |
| Columbiana, OH | 1391            | (1319,1492)            | 1521            | 1.09              | 130           | (29,202)             | 128                       | 173             | 133.1                        |
| Coshocton, OH  | 443             | (412,508)              | 499             | 1.13              | 56            | (-9,87)              | 152                       | 42              | 75.0                         |
| Crawford, OH   | 610             | (563,668)              | 685             | 1.12              | 75            | (17,122)             | 182                       | 85              | 113.3                        |
| Cuyahoga, OH   | 14173           | (13926,14563)          | 16198           | 1.14              | 2025          | (1635,2272)          | 164                       | 1650            | 81.5                         |
| Darke, OH      | 669             | (621,740)              | 710             | 1.06              | 41            | (-30,89)             | 81                        | 104             | 253.7                        |
| Defiance, OH   | 435             | (398,490)              | 475             | 1.09              | 40            | (-15,77)             | 105                       | 76              | 190.0                        |
| Delaware, OH   | 1296            | (1235,1388)            | 1474            | 1.14              | 178           | (86,239)             | 83                        | 99              | 55.6                         |
| Erie, OH       | 1016            | (952,1091)             | 1183            | 1.16              | 167           | (92,231)             | 225                       | 135             | 80.8                         |
| Fairfield, OH  | 1540            | (1469,1652)            | 1688            | 1.10              | 148           | (36,219)             | 93                        | 154             | 104.1                        |
| Fayette, OH    | 390             | (352,435)              | 395             | 1.01              | 5             | (-40,43)             | 17                        | 34              | 680.0                        |
| Franklin, OH   | 10589           | (10334,10845)          | 11873           | 1.12              | 1284          | (1028,1539)          | 96                        | 1197            | 93.2                         |
| Fulton, OH     | 480             | (439,540)              | 507             | 1.06              | 27            | (-33,68)             | 64                        | 56              | 207.4                        |
| Gallia, OH     | 423             | (384,478)              | 451             | 1.07              | 28            | (-27,67)             | 94                        | 34              | 121.4                        |
| Geauga, OH     | 897             | (848,976)              | 1031            | 1.15              | 134           | (55,183)             | 142                       | 129             | 96.3                         |
| Greene, OH     | 1675            | (1613,1799)            | 1875            | 1.12              | 200           | (76,262)             | 117                       | 183             | 91.5                         |
| Guernsey, OH   | 517             | (476,582)              | 538             | 1.04              | 21            | (-44,62)             | 54                        | 39              | 185.7                        |
| Hamilton, OH   | 8328            | (8077,8516)            | 9353            | 1.12              | 1025          | (837,1276)           | 125                       | 871             | 85.0                         |
| Hancock, OH    | 850             | (786,917)              | 915             | 1.08              | 65            | (-2,129)             | 85                        | 110             | 169.2                        |
| Hardin, OH     | 336             | (301,380)              | 396             | 1.18              | 60            | (16,95)              | 189                       | 60              | 100.0                        |
| Harrison, OH   | 214             | (183,246)              | 228             | 1.07              | 14            | (-18,45)             | 93                        | 17              | 121.4                        |
| Henry, OH      | 308             | (267,346)              | 376             | 1.22              | 68            | (30,109)             | 253                       | 55              | 80.9                         |
| Highland, OH   | 524             | (468,564)              | 580             | 1.11              | 56            | (16,112)             | 129                       | 56              | 100.0                        |
| Hocking, OH    | 346             | (321,401)              | 391             | 1.13              | 45            | (-10,70)             | 159                       | 45              | 100.0                        |
| Holmes, OH     | 358             | (319,400)              | 427             | 1.19              | 69            | (27,108)             | 157                       | 81              | 117.4                        |
| Huron, OH      | 650             | (611,722)              | 788             | 1.21              | 138           | (66,177)             | 236                       | 88              | 63.8                         |
| Jackson, OH    | 462             | (426,525)              | 492             | 1.06              | 30            | (-33,66)             | 93                        | 45              | 150.0                        |
| Jefferson, OH  | 918             | (850,988)              | 1010            | 1.10              | 92            | (22,160)             | 143                       | 99              | 107.6                        |
| Knox, OH       | 638             | (570,679)              | 769             | 1.21              | 131           | (90,199)             | 207                       | 79              | 60.3                         |
| Lake, OH       | 2674            | (2588,2819)            | 2932            | 1.10              | 258           | (113,344)            | 112                       | 279             | 108.1                        |
| Lawrence, OH   | 940             | (890,1031)             | 960             | 1.02              | 20            | (-71,70)             | 34                        | 79              | 395.0                        |
| Licking, OH    | 1847            | (1766,1955)            | 1953            | 1.06              | 106           | (-2,187)             | 59                        | 169             | 159.4                        |
| Logan, OH      | 551             | (496,597)              | 572             | 1.04              | 21            | (-25,76)             | 46                        | 47              | 223.8                        |
| Lorain, OH     | 3412            | (3300,3564)            | 3673            | 1.08              | 261           | (109,373)            | 83                        | 356             | 136.4                        |
| Lucas, OH      | 4843            | (4725,5053)            | 5673            | 1.17              | 830           | (620,948)            | 194                       | 650             | 78.3                         |
| Madison, OH    | 458             | (412,509)              | 473             | 1.03              | 15            | (-36,61)             | 33                        | 52              | 346.7                        |
| Mahoning, OH   | 3088            | (2936,3208)            | 3804            | 1.23              | 716           | (596,868)            | 315                       | 512             | 71.5                         |

Table C1: Primary Estimates for Each County

| County         | Expected Deaths | Expected Deaths 95% CI | Observed Deaths | Observed/Expected | Excess Deaths | Excess Deaths 95% CI | Excess Deaths Per 100,000 | COVID-19 Deaths | COVID-19 to Excess Ratio (%) |
|----------------|-----------------|------------------------|-----------------|-------------------|---------------|----------------------|---------------------------|-----------------|------------------------------|
| Marion, OH     | 856             | (808,932)              | 842             | 0.98              | -14           | (-90,34)             | -21                       | 121             | NA                           |
| Medina, OH     | 1653            | (1564,1745)            | 1865            | 1.13              | 212           | (120,301)            | 117                       | 195             | 92.0                         |
| Meigs, OH      | 348             | (305,388)              | 357             | 1.03              | 9             | (-31,52)             | 39                        | 27              | 300.0                        |
| Mercer, OH     | 416             | (368,456)              | 546             | 1.31              | 130           | (90,178)             | 317                       | 84              | 64.6                         |
| Miami, OH      | 1212            | (1150,1314)            | 1310            | 1.08              | 98            | (-4,160)             | 91                        | 138             | 140.8                        |
| Monroe, OH     | 184             | (159,219)              | 198             | 1.08              | 14            | (-21,39)             | 104                       | 28              | 200.0                        |
| Montgomery, OH | 6749            | (6609,7028)            | 7478            | 1.11              | 729           | (450,869)            | 137                       | 764             | 104.8                        |
| Morgan, OH     | 183             | (156,216)              | 221             | 1.21              | 38            | (5,65)               | 263                       | 16              | 42.1                         |
| Morrow, OH     | 347             | (307,386)              | 379             | 1.09              | 32            | (-7,72)              | 90                        | 31              | 96.9                         |
| Muskingum, OH  | 1076            | (1007,1157)            | 1156            | 1.07              | 80            | (-1,149)             | 93                        | 96              | 120.0                        |
| Noble, OH      | 149             | (126,181)              | 160             | 1.07              | 11            | (-21,34)             | 77                        | 37              | 336.4                        |
| Ottawa, OH     | 546             | (502,605)              | 602             | 1.10              | 56            | (-3,100)             | 137                       | 59              | 105.4                        |
| Paulding, OH   | 213             | (186,249)              | 235             | 1.10              | 22            | (-14,49)             | 118                       | 31              | 140.9                        |
| Perry, OH      | 384             | (346,433)              | 446             | 1.16              | 62            | (13,100)             | 172                       | 40              | 64.5                         |
| Pickaway, OH   | 685             | (637,759)              | 719             | 1.05              | 34            | (-40,82)             | 58                        | 98              | 288.2                        |
| Pike, OH       | 407             | (367,460)              | 422             | 1.04              | 15            | (-38,55)             | 54                        | 15              | 100.0                        |
| Portage, OH    | 1635            | (1546,1738)            | 1699            | 1.04              | 64            | (-39,153)            | 39                        | 133             | 207.8                        |
| Preble, OH     | 509             | (471,571)              | 559             | 1.10              | 50            | (-12,88)             | 123                       | 81              | 162.0                        |
| Putnam, OH     | 328             | (291,375)              | 413             | 1.26              | 85            | (38,122)             | 253                       | 89              | 104.7                        |
| Richland, OH   | 1587            | (1520,1707)            | 1725            | 1.09              | 138           | (18,205)             | 114                       | 159             | 115.2                        |
| Ross, OH       | 918             | (860,994)              | 1095            | 1.19              | 177           | (101,235)            | 229                       | 116             | 65.5                         |
| Sandusky, OH   | 737             | (688,810)              | 745             | 1.01              | 8             | (-65,57)             | 14                        | 93              | 1162.5                       |
| Scioto, OH     | 1145            | (1102,1259)            | 1305            | 1.14              | 160           | (46,203)             | 213                       | 79              | 49.4                         |
| Seneca, OH     | 638             | (588,703)              | 722             | 1.13              | 84            | (19,134)             | 153                       | 83              | 98.8                         |
| Shelby, OH     | 509             | (472,569)              | 631             | 1.24              | 122           | (62,159)             | 252                       | 64              | 52.5                         |
| Stark, OH      | 4619            | (4531,4852)            | 5286            | 1.14              | 667           | (434,755)            | 180                       | 690             | 103.4                        |
| Summit, OH     | 6145            | (5976,6374)            | 6860            | 1.12              | 715           | (486,884)            | 132                       | 703             | 98.3                         |
| Trumbull, OH   | 2700            | (2590,2835)            | 3133            | 1.16              | 433           | (298,543)            | 220                       | 376             | 86.8                         |
| Tuscarawas, OH | 1162            | (1104,1254)            | 1342            | 1.15              | 180           | (88,238)             | 196                       | 190             | 105.6                        |
| Union, OH      | 452             | (405,499)              | 488             | 1.08              | 36            | (-11,83)             | 60                        | 34              | 94.4                         |
| Van Wert, OH   | 341             | (298,377)              | 394             | 1.16              | 53            | (17,96)              | 188                       | 61              | 115.1                        |
| Vinton, OH     | 165             | (144,204)              | 202             | 1.22              | 37            | (-2,58)              | 280                       | 10              | 27.0                         |
| Warren, OH     | 2005            | (1934,2144)            | 2228            | 1.11              | 223           | (84,294)             | 93                        | 225             | 100.9                        |
| Washington, OH | 784             | (714,844)              | 835             | 1.07              | 51            | (-9,121)             | 86                        | 83              | 162.7                        |
| Wayne, OH      | 1247            | (1196,1352)            | 1378            | 1.11              | 131           | (26,182)             | 114                       | 175             | 133.6                        |
| Williams, OH   | 480             | (438,534)              | 445             | 0.93              | -35           | (-89,7)              | -95                       | 54              | NA                           |
| Wood, OH       | 1285            | (1210,1380)            | 1393            | 1.08              | 108           | (13,183)             | 82                        | 161             | 149.1                        |
| Wyandot, OH    | 278             | (243,314)              | 318             | 1.14              | 40            | (4,75)               | 185                       | 38              | 95.0                         |
| Adair, OK      | 267             | (230,297)              | 278             | 1.04              | 11            | (-19,48)             | 49                        | 30              | 272.7                        |
| Alfalfa, OK    | 50              | (37,67)                | 84              | 1.68              | 34            | (17,47)              | 621                       | 10              | 29.4                         |
| Atoka, OK      | 179             | (144,201)              | 210             | 1.17              | 31            | (9,66)               | 224                       | 21              | 67.7                         |
| Beaver, OK     | 63              | (50,85)                | 62              | 0.98              | -1            | (-23,12)             | -19                       | 10              | NA                           |
| Beckham, OK    | 244             | (216,284)              | 300             | 1.23              | 56            | (16,84)              | 260                       | 51              | 91.1                         |
| Blaine, OK     | 139             | (118,169)              | 158             | 1.14              | 19            | (-11,40)             | 201                       | 20              | 105.3                        |
| Bryan, OK      | 554             | (501,602)              | 626             | 1.13              | 72            | (24,125)             | 148                       | 73              | 101.4                        |
| Caddo, OK      | 383             | (345,432)              | 471             | 1.23              | 88            | (39,126)             | 310                       | 90              | 102.3                        |
| Canadian, OK   | 1169            | (1102,1250)            | 1293            | 1.11              | 124           | (43,191)             | 81                        | 175             | 141.1                        |
| Carter, OK     | 579             | (520,631)              | 696             | 1.20              | 117           | (65,176)             | 244                       | 59              | 50.4                         |
| Cherokee, OK   | 513             | (465,564)              | 601             | 1.17              | 88            | (37,136)             | 183                       | 60              | 68.2                         |
| Choctaw, OK    | 212             | (174,238)              | 268             | 1.26              | 56            | (30,94)              | 390                       | 23              | 41.1                         |
| Cimarron, OK   | 25              | (13,34)                | 22              | 0.88              | -3            | (-12,9)              | -139                      | 5               | NA                           |
| Cleveland, OK  | 2143            | (2053,2268)            | 2439            | 1.14              | 296           | (171,386)            | 104                       | 285             | 96.3                         |
| Coal, OK       | 91              | (74,114)               | 103             | 1.13              | 12            | (-11,29)             | 226                       | 11              | 91.7                         |
| Comanche, OK   | 1093            | (1019,1170)            | 1279            | 1.17              | 186           | (109,260)            | 158                       | 107             | 57.5                         |
| Cotton, OK     | 75              | (58,96)                | 94              | 1.25              | 19            | (-2,36)              | 337                       | 16              | 84.2                         |
| Craig, OK      | 203             | (175,237)              | 230             | 1.13              | 27            | (-7,55)              | 190                       | 22              | 81.5                         |
| Creek, OK      | 890             | (826,968)              | 977             | 1.10              | 87            | (9,151)              | 122                       | 114             | 131.0                        |
| Custer, OK     | 319             | (279,357)              | 399             | 1.25              | 80            | (42,120)             | 274                       | 84              | 105.0                        |
| Delaware, OK   | 583             | (523,626)              | 702             | 1.20              | 119           | (76,179)             | 277                       | 102             | 85.7                         |
| Dewey, OK      | 68              | (52,87)                | 72              | 1.06              | 4             | (-15,20)             | 81                        | 15              | 375.0                        |
| Ellis, OK      | 59              | (39,70)                | 55              | 0.93              | -4            | (-15,16)             | -102                      | 5               | NA                           |
| Garfield, OK   | 685             | (636,752)              | 838             | 1.22              | 153           | (86,202)             | 256                       | 134             | 87.6                         |
| Garvin, OK     | 350             | (315,403)              | 423             | 1.21              | 73            | (20,108)             | 264                       | 53              | 72.6                         |
| Grady, OK      | 588             | (543,652)              | 710             | 1.21              | 122           | (58,167)             | 214                       | 101             | 82.8                         |



Table C1: Primary Estimates for Each County

| County           | Expected Deaths | Expected Deaths 95% CI | Observed Deaths | Observed/Expected | Excess Deaths | Excess Deaths 95% CI | Excess Deaths Per 100,000 | COVID-19 Deaths | COVID-19 to Excess Ratio (%) |
|------------------|-----------------|------------------------|-----------------|-------------------|---------------|----------------------|---------------------------|-----------------|------------------------------|
| Grant, OK        | 61              | (48,82)                | 75              | 1.23              | 14            | (-7,27)              | 332                       | 5               | 35.7                         |
| Greer, OK        | 69              | (49,87)                | 87              | 1.26              | 18            | (0,38)               | 307                       | 20              | 111.1                        |
| Harmon, OK       | 36              | (26,52)                | 43              | 1.19              | 7             | (-9,17)              | 269                       | 5               | 71.4                         |
| Harper, OK       | 39              | (27,52)                | 58              | 1.49              | 19            | (6,31)               | 517                       | 5               | 26.3                         |
| Haskell, OK      | 174             | (144,205)              | 186             | 1.07              | 12            | (-19,42)             | 96                        | 15              | 125.0                        |
| Hughes, OK       | 198             | (165,230)              | 230             | 1.16              | 32            | (0,65)               | 238                       | 27              | 84.4                         |
| Jackson, OK      | 257             | (220,291)              | 325             | 1.26              | 68            | (34,105)             | 278                       | 62              | 91.2                         |
| Jefferson, OK    | 87              | (65,105)               | 105             | 1.21              | 18            | (0,40)               | 299                       | 10              | 55.6                         |
| Johnston, OK     | 140             | (116,169)              | 143             | 1.02              | 3             | (-26,27)             | 28                        | 19              | 633.3                        |
| Kay, OK          | 611             | (567,681)              | 711             | 1.16              | 100           | (30,144)             | 230                       | 109             | 109.0                        |
| Kingfisher, OK   | 166             | (143,202)              | 178             | 1.07              | 12            | (-24,35)             | 74                        | 37              | 308.3                        |
| Kiowa, OK        | 141             | (115,169)              | 187             | 1.33              | 46            | (18,72)              | 543                       | 29              | 63.0                         |
| Latimer, OK      | 168             | (132,189)              | 124             | 0.74              | -44           | (-65,-8)             | -440                      | 11              | NA                           |
| Le Flore, OK     | 666             | (619,730)              | 743             | 1.12              | 77            | (13,124)             | 153                       | 67              | 87.0                         |
| Lincoln, OK      | 408             | (360,445)              | 444             | 1.09              | 36            | (-1,84)              | 104                       | 53              | 147.2                        |
| Logan, OK        | 403             | (363,446)              | 435             | 1.08              | 32            | (-11,72)             | 66                        | 40              | 125.0                        |
| Love, OK         | 126             | (101,151)              | 144             | 1.14              | 18            | (-7,43)              | 175                       | 18              | 100.0                        |
| McClain, OK      | 417             | (370,458)              | 445             | 1.07              | 28            | (-13,75)             | 68                        | 72              | 257.1                        |
| McCurtain, OK    | 429             | (386,481)              | 534             | 1.24              | 105           | (53,148)             | 325                       | 97              | 92.4                         |
| McIntosh, OK     | 314             | (285,361)              | 366             | 1.17              | 52            | (5,81)               | 260                       | 44              | 84.6                         |
| Major, OK        | 117             | (91,135)               | 124             | 1.06              | 7             | (-11,33)             | 92                        | 20              | 285.7                        |
| Marshall, OK     | 217             | (180,243)              | 249             | 1.15              | 32            | (6,69)               | 182                       | 21              | 65.6                         |
| Mayes, OK        | 510             | (464,564)              | 548             | 1.07              | 38            | (-16,84)             | 92                        | 63              | 165.8                        |
| Murray, OK       | 196             | (169,234)              | 218             | 1.11              | 22            | (-16,49)             | 156                       | 19              | 86.4                         |
| Muskogee, OK     | 930             | (862,993)              | 1064            | 1.14              | 134           | (71,202)             | 199                       | 119             | 88.8                         |
| Noble, OK        | 155             | (129,183)              | 153             | 0.99              | -2            | (-30,24)             | -18                       | 13              | NA                           |
| Nowata, OK       | 140             | (113,165)              | 134             | 0.96              | -6            | (-31,21)             | -60                       | 15              | NA                           |
| Okfuskee, OK     | 202             | (179,244)              | 210             | 1.04              | 8             | (-34,31)             | 66                        | 32              | 400.0                        |
| Oklahoma, OK     | 7512            | (7332,7739)            | 8934            | 1.19              | 1422          | (1195,1602)          | 177                       | 1020            | 71.7                         |
| Okmulgee, OK     | 525             | (482,582)              | 617             | 1.18              | 92            | (35,135)             | 246                       | 68              | 73.9                         |
| Osage, OK        | 479             | (439,531)              | 518             | 1.08              | 39            | (-13,79)             | 84                        | 50              | 128.2                        |
| Ottawa, OK       | 443             | (397,490)              | 481             | 1.09              | 38            | (-9,84)              | 123                       | 64              | 168.4                        |
| Pawnee, OK       | 211             | (184,244)              | 249             | 1.18              | 38            | (5,65)               | 234                       | 32              | 84.2                         |
| Payne, OK        | 628             | (582,690)              | 686             | 1.09              | 58            | (-4,104)             | 70                        | 58              | 100.0                        |
| Pittsburg, OK    | 631             | (582,690)              | 695             | 1.10              | 64            | (5,113)              | 148                       | 63              | 98.4                         |
| Pontotoc, OK     | 450             | (403,496)              | 502             | 1.12              | 52            | (6,99)               | 137                       | 47              | 90.4                         |
| Pottawatomie, OK | 921             | (859,996)              | 1009            | 1.10              | 88            | (13,150)             | 120                       | 87              | 98.9                         |
| Pushmataha, OK   | 159             | (132,187)              | 193             | 1.21              | 34            | (6,61)               | 301                       | 14              | 41.2                         |
| Roger Mills, OK  | 39              | (28,55)                | 56              | 1.44              | 17            | (1,28)               | 469                       | 11              | 64.7                         |
| Rogers, OK       | 990             | (918,1053)             | 1098            | 1.11              | 108           | (45,180)             | 116                       | 122             | 113.0                        |
| Seminole, OK     | 359             | (317,403)              | 422             | 1.18              | 63            | (19,105)             | 263                       | 47              | 74.6                         |
| Sequoyah, OK     | 549             | (494,594)              | 661             | 1.20              | 112           | (67,167)             | 274                       | 66              | 58.9                         |
| Stephens, OK     | 598             | (556,663)              | 626             | 1.05              | 28            | (-37,70)             | 65                        | 61              | 217.9                        |
| Texas, OK        | 198             | (169,229)              | 197             | 0.99              | -1            | (-32,28)             | -5                        | 40              | NA                           |
| Tillman, OK      | 96              | (75,116)               | 120             | 1.25              | 24            | (4,45)               | 334                       | 19              | 79.2                         |
| Tulsa, OK        | 6112            | (5940,6313)            | 7046            | 1.15              | 934           | (733,1106)           | 143                       | 735             | 78.7                         |
| Wagoner, OK      | 668             | (622,733)              | 784             | 1.17              | 116           | (51,162)             | 141                       | 78              | 67.2                         |
| Washington, OK   | 691             | (640,754)              | 719             | 1.04              | 28            | (-35,79)             | 54                        | 79              | 282.1                        |
| Washita, OK      | 155             | (133,187)              | 168             | 1.08              | 13            | (-19,35)             | 117                       | 23              | 176.9                        |
| Woods, OK        | 98              | (83,129)               | 108             | 1.10              | 10            | (-21,25)             | 117                       | 10              | 100.0                        |
| Woodward, OK     | 201             | (175,240)              | 253             | 1.26              | 52            | (13,78)              | 264                       | 31              | 59.6                         |
| Baker, OR        | 218             | (188,253)              | 243             | 1.11              | 25            | (-10,55)             | 158                       | 5               | 20.0                         |
| Benton, OR       | 599             | (549,656)              | 616             | 1.03              | 17            | (-40,67)             | 18                        | 13              | 76.5                         |
| Clackamas, OR    | 3608            | (3475,3751)            | 3768            | 1.04              | 160           | (17,293)             | 38                        | 137             | 85.6                         |
| Clatsop, OR      | 424             | (377,471)              | 415             | 0.98              | -9            | (-56,38)             | -22                       | 5               | NA                           |
| Columbia, OR     | 505             | (459,557)              | 536             | 1.06              | 31            | (-21,77)             | 58                        | 22              | 71.0                         |
| Coos, OR         | 987             | (920,1068)             | 940             | 0.95              | -47           | (-128,20)            | -72                       | 12              | NA                           |
| Crook, OR        | 303             | (262,337)              | 266             | 0.88              | -37           | (-71,4)              | -145                      | 5               | NA                           |
| Curry, OR        | 396             | (344,436)              | 470             | 1.19              | 74            | (34,126)             | 321                       | 5               | 6.8                          |
| Deschutes, OR    | 1630            | (1525,1701)            | 1589            | 0.97              | -41           | (-112,64)            | -20                       | 27              | NA                           |
| Douglas, OR      | 1613            | (1528,1713)            | 1689            | 1.05              | 76            | (-24,161)            | 68                        | 38              | 50.0                         |
| Gilliam, OR      | 22              | (11,30)                | 16              | 0.73              | -6            | (-14,5)              | -307                      | 5               | NA                           |
| Grant, OR        | 101             | (81,126)               | 105             | 1.04              | 4             | (-21,24)             | 56                        | 5               | 125.0                        |
| Harney, OR       | 91              | (72,115)               | 98              | 1.08              | 7             | (-17,26)             | 94                        | 5               | 71.4                         |

Table C1: Primary Estimates for Each County

| County         | Expected Deaths | Expected Deaths 95% CI | Observed Deaths | Observed/Expected | Excess Deaths | Excess Deaths 95% CI | Excess Deaths Per 100,000 | COVID-19 Deaths | COVID-19 to Excess Ratio (%) |
|----------------|-----------------|------------------------|-----------------|-------------------|---------------|----------------------|---------------------------|-----------------|------------------------------|
| Hood River, OR | 189             | (158,220)              | 190             | 1.01              | 1             | (-30,32)             | 4                         | 14              | 1400.0                       |
| Jackson, OR    | 2535            | (2402,2636)            | 2641            | 1.04              | 106           | (5,239)              | 47                        | 76              | 71.7                         |
| Jefferson, OR  | 227             | (196,262)              | 306             | 1.35              | 79            | (44,110)             | 314                       | 21              | 26.6                         |
| Josephine, OR  | 1273            | (1199,1355)            | 1334            | 1.05              | 61            | (-21,135)            | 69                        | 26              | 42.6                         |
| Klamath, OR    | 907             | (857,986)              | 923             | 1.02              | 16            | (-63,66)             | 23                        | 26              | 162.5                        |
| Lake, OR       | 111             | (91,140)               | 111             | 1.00              | 0             | (-29,20)             | 0                         | 5               | Inf                          |
| Lane, OR       | 3898            | (3777,4068)            | 4053            | 1.04              | 155           | (-15,276)            | 40                        | 89              | 57.4                         |
| Lincoln, OR    | 658             | (606,718)              | 681             | 1.03              | 23            | (-37,75)             | 46                        | 17              | 73.9                         |
| Linn, OR       | 1460            | (1377,1552)            | 1495            | 1.02              | 35            | (-57,118)            | 26                        | 42              | 120.0                        |
| Malheur, OR    | 313             | (267,344)              | 385             | 1.23              | 72            | (41,118)             | 230                       | 52              | 72.2                         |
| Marion, OR     | 3021            | (2903,3143)            | 3174            | 1.05              | 153           | (31,271)             | 43                        | 214             | 139.9                        |
| Morrow, OR     | 87              | (66,108)               | 107             | 1.23              | 20            | (-1,41)              | 171                       | 12              | 60.0                         |
| Multnomah, OR  | 5861            | (5684,6035)            | 6473            | 1.10              | 612           | (438,789)            | 75                        | 433             | 70.8                         |
| Polk, OR       | 759             | (697,829)              | 784             | 1.03              | 25            | (-45,87)             | 28                        | 34              | 136.0                        |
| Sherman, OR    | 22              | (12,32)                | 22              | 1.00              | 0             | (-10,10)             | 0                         | 0               | NA                           |
| Tillamook, OR  | 322             | (281,362)              | 347             | 1.08              | 25            | (-15,66)             | 92                        | 5               | 20.0                         |
| Umatilla, OR   | 696             | (638,754)              | 838             | 1.20              | 142           | (84,200)             | 181                       | 64              | 45.1                         |
| Union, OR      | 298             | (264,340)              | 291             | 0.98              | -7            | (-49,27)             | -26                       | 10              | NA                           |
| Wallowa, OR    | 91              | (70,110)               | 80              | 0.88              | -11           | (-30,10)             | -153                      | 5               | NA                           |
| Wasco, OR      | 340             | (294,374)              | 342             | 1.01              | 2             | (-32,48)             | 7                         | 30              | 1500.0                       |
| Washington, OR | 3639            | (3502,3779)            | 3780            | 1.04              | 141           | (1,278)              | 23                        | 148             | 105.0                        |
| Wheeler, OR    | 20              | (9,27)                 | 19              | 0.95              | -1            | (-8,10)              | -72                       | 5               | NA                           |
| Yamhill, OR    | 1041            | (962,1104)             | 1049            | 1.01              | 8             | (-55,87)             | 7                         | 41              | 512.5                        |
| Adams, PA      | 1127            | (1047,1196)            | 1182            | 1.05              | 55            | (-14,135)            | 53                        | 100             | 181.8                        |
| Allegheny, PA  | 13909           | (13554,14213)          | 15201           | 1.09              | 1292          | (988,1647)           | 106                       | 1237            | 95.7                         |
| Armstrong, PA  | 880             | (821,955)              | 938             | 1.07              | 58            | (-17,117)            | 91                        | 77              | 132.8                        |
| Beaver, PA     | 2246            | (2156,2366)            | 2462            | 1.10              | 216           | (96,306)             | 133                       | 278             | 128.7                        |
| Bedford, PA    | 611             | (557,672)              | 740             | 1.21              | 129           | (68,183)             | 271                       | 108             | 83.7                         |
| Berks, PA      | 4182            | (4029,4346)            | 4624            | 1.11              | 442           | (278,595)            | 104                       | 614             | 138.9                        |
| Blair, PA      | 1630            | (1537,1712)            | 1906            | 1.17              | 276           | (194,369)            | 228                       | 203             | 73.6                         |
| Bradford, PA   | 733             | (676,794)              | 721             | 0.98              | -12           | (-73,45)             | -20                       | 62              | NA                           |
| Bucks, PA      | 6515            | (6355,6727)            | 7218            | 1.11              | 703           | (491,863)            | 112                       | 965             | 137.3                        |
| Butler, PA     | 2135            | (2051,2267)            | 2327            | 1.09              | 192           | (60,276)             | 101                       | 255             | 132.8                        |
| Cambria, PA    | 1937            | (1842,2046)            | 2165            | 1.12              | 228           | (119,323)            | 177                       | 315             | 138.2                        |
| Cameron, PA    | 64              | (46,81)                | 69              | 1.08              | 5             | (-12,23)             | 118                       | 5               | 100.0                        |
| Carbon, PA     | 827             | (735,868)              | 972             | 1.18              | 145           | (104,237)            | 223                       | 95              | 65.5                         |
| Centre, PA     | 1014            | (943,1091)             | 1224            | 1.21              | 210           | (133,281)            | 128                       | 158             | 75.2                         |
| Chester, PA    | 4231            | (4089,4382)            | 4664            | 1.10              | 433           | (282,575)            | 82                        | 602             | 139.0                        |
| Clarion, PA    | 428             | (389,478)              | 520             | 1.21              | 92            | (42,131)             | 240                       | 53              | 57.6                         |
| Clearfield, PA | 992             | (946,1082)             | 1016            | 1.02              | 24            | (-66,70)             | 31                        | 60              | 250.0                        |
| Clinton, PA    | 437             | (403,494)              | 424             | 0.97              | -13           | (-70,21)             | -34                       | 30              | NA                           |
| Columbia, PA   | 733             | (677,793)              | 774             | 1.06              | 41            | (-19,97)             | 63                        | 85              | 207.3                        |
| Crawford, PA   | 1015            | (938,1091)             | 1094            | 1.08              | 79            | (3,156)              | 94                        | 105             | 132.9                        |
| Cumberland, PA | 2521            | (2406,2643)            | 2795            | 1.11              | 274           | (152,389)            | 107                       | 337             | 123.0                        |
| Dauphin, PA    | 2627            | (2510,2739)            | 3030            | 1.15              | 403           | (291,520)            | 144                       | 370             | 91.8                         |
| Delaware, PA   | 5573            | (5420,5783)            | 6586            | 1.18              | 1013          | (803,1166)           | 179                       | 1042            | 102.9                        |
| Elk, PA        | 390             | (345,428)              | 378             | 0.97              | -12           | (-50,33)             | -40                       | 22              | NA                           |
| Erie, PA       | 2980            | (2870,3131)            | 3296            | 1.11              | 316           | (165,426)            | 118                       | 277             | 87.7                         |
| Fayette, PA    | 1851            | (1764,1955)            | 1984            | 1.07              | 133           | (29,220)             | 104                       | 183             | 137.6                        |
| Forest, PA     | 84              | (67,108)               | 97              | 1.15              | 13            | (-11,30)             | 181                       | 10              | 76.9                         |
| Franklin, PA   | 1710            | (1612,1805)            | 1980            | 1.16              | 270           | (175,368)            | 174                       | 258             | 95.6                         |
| Fulton, PA     | 177             | (143,201)              | 183             | 1.03              | 6             | (-18,40)             | 41                        | 15              | 250.0                        |
| Greene, PA     | 457             | (409,504)              | 493             | 1.08              | 36            | (-11,84)             | 101                       | 37              | 102.8                        |
| Huntingdon, PA | 506             | (458,559)              | 578             | 1.14              | 72            | (19,120)             | 161                       | 95              | 131.9                        |
| Indiana, PA    | 945             | (884,1024)             | 1092            | 1.16              | 147           | (68,208)             | 176                       | 131             | 89.1                         |
| Jefferson, PA  | 564             | (507,613)              | 625             | 1.11              | 61            | (12,118)             | 141                       | 66              | 108.2                        |
| Juniata, PA    | 264             | (226,297)              | 332             | 1.26              | 68            | (35,106)             | 274                       | 67              | 98.5                         |
| Lackawanna, PA | 2712            | (2565,2809)            | 2954            | 1.09              | 242           | (145,389)            | 115                       | 289             | 119.4                        |
| Lancaster, PA  | 5365            | (5193,5545)            | 6070            | 1.13              | 705           | (525,877)            | 129                       | 793             | 112.5                        |
| Lawrence, PA   | 1228            | (1156,1316)            | 1414            | 1.15              | 186           | (98,258)             | 218                       | 154             | 82.8                         |
| Lebanon, PA    | 1611            | (1523,1704)            | 1809            | 1.12              | 198           | (105,286)            | 137                       | 165             | 83.3                         |
| Lehigh, PA     | 3505            | (3377,3636)            | 3967            | 1.13              | 462           | (331,590)            | 124                       | 550             | 119.0                        |
| Luzerne, PA    | 4204            | (4094,4391)            | 4751            | 1.13              | 547           | (360,657)            | 172                       | 509             | 93.1                         |
| Lycoming, PA   | 1332            | (1267,1429)            | 1478            | 1.11              | 146           | (49,211)             | 129                       | 154             | 105.5                        |

Table C1: Primary Estimates for Each County

| County             | Expected Deaths | Expected Deaths 95% CI | Observed Deaths | Observed/Expected | Excess Deaths | Excess Deaths 95% CI | Excess Deaths Per 100,000 | COVID-19 Deaths | COVID-19 Excess Ratio (%) |
|--------------------|-----------------|------------------------|-----------------|-------------------|---------------|----------------------|---------------------------|-----------------|---------------------------|
| Mc Kean, PA        | 531             | (488,584)              | 530             | 1.00              | -1            | (-54,42)             | -2                        | 35              | NA                        |
| Mercer, PA         | 1554            | (1474,1658)            | 1718            | 1.11              | 164           | (60,244)             | 151                       | 193             | 117.7                     |
| Mifflin, PA        | 600             | (547,651)              | 734             | 1.22              | 134           | (83,187)             | 291                       | 129             | 96.3                      |
| Monroe, PA         | 1658            | (1563,1744)            | 1811            | 1.09              | 153           | (67,248)             | 89                        | 230             | 150.3                     |
| Montgomery, PA     | 7948            | (7757,8201)            | 8965            | 1.13              | 1017          | (764,1208)           | 122                       | 1246            | 122.5                     |
| Montour, PA        | 235             | (202,269)              | 261             | 1.11              | 26            | (-8,59)              | 143                       | 29              | 111.5                     |
| Northampton, PA    | 3246            | (3108,3371)            | 3602            | 1.11              | 356           | (231,494)            | 116                       | 477             | 134.0                     |
| Northumberland, PA | 1180            | (1112,1262)            | 1465            | 1.24              | 285           | (203,353)            | 318                       | 251             | 88.1                      |
| Perry, PA          | 478             | (426,523)              | 529             | 1.11              | 51            | (6,103)              | 110                       | 46              | 90.2                      |
| Philadelphia, PA   | 14211           | (13890,14528)          | 18135           | 1.28              | 3924          | (3607,4245)          | 247                       | 2679            | 68.3                      |
| Pike, PA           | 599             | (540,647)              | 628             | 1.05              | 29            | (-19,88)             | 51                        | 51              | 175.9                     |
| Potter, PA         | 219             | (189,258)              | 222             | 1.01              | 3             | (-36,33)             | 19                        | 15              | 500.0                     |
| Schuylkill, PA     | 1969            | (1876,2087)            | 2285            | 1.16              | 316           | (198,409)            | 224                       | 265             | 83.9                      |
| Snyder, PA         | 375             | (341,430)              | 424             | 1.13              | 49            | (-6,83)              | 121                       | 47              | 95.9                      |
| Somerset, PA       | 1006            | (937,1079)             | 1117            | 1.11              | 111           | (38,180)             | 152                       | 116             | 104.5                     |
| Sullivan, PA       | 89              | (69,111)               | 102             | 1.15              | 13            | (-9,33)              | 219                       | 5               | 38.5                      |
| Susquehanna, PA    | 519             | (467,561)              | 559             | 1.08              | 40            | (-2,92)              | 100                       | 42              | 105.0                     |
| Tioga, PA          | 494             | (444,548)              | 524             | 1.06              | 30            | (-24,80)             | 73                        | 85              | 283.3                     |
| Union, PA          | 375             | (338,419)              | 483             | 1.29              | 108           | (64,145)             | 241                       | 50              | 46.3                      |
| Venango, PA        | 632             | (587,693)              | 754             | 1.19              | 122           | (61,167)             | 243                       | 58              | 47.5                      |
| Warren, PA         | 513             | (461,558)              | 578             | 1.13              | 65            | (20,117)             | 166                       | 60              | 92.3                      |
| Washington, PA     | 2634            | (2505,2764)            | 2790            | 1.06              | 156           | (26,285)             | 75                        | 157             | 100.6                     |
| Wayne, PA          | 634             | (583,695)              | 698             | 1.10              | 64            | (3,115)              | 125                       | 32              | 50.0                      |
| Westmoreland, PA   | 4715            | (4579,4920)            | 5078            | 1.08              | 363           | (158,499)            | 105                       | 486             | 133.9                     |
| Wyoming, PA        | 359             | (325,410)              | 330             | 0.92              | -29           | (-80,5)              | -110                      | 32              | NA                        |
| York, PA           | 4480            | (4324,4633)            | 4990            | 1.11              | 510           | (357,666)            | 113                       | 498             | 97.6                      |
| Bristol, RI        | 554             | (498,606)              | 568             | 1.03              | 14            | (-38,70)             | 29                        | 73              | 521.4                     |
| Kent, RI           | 1817            | (1738,1934)            | 2009            | 1.11              | 192           | (75,271)             | 117                       | 256             | 133.3                     |
| Newport, RI        | 837             | (781,903)              | 837             | 1.00              | 0             | (-66,56)             | 0                         | 41              | Inf                       |
| Providence, RI     | 5846            | (5651,6027)            | 6995            | 1.20              | 1149          | (968,1344)           | 180                       | 1392            | 121.1                     |
| Washington, RI     | 1289            | (1213,1377)            | 1410            | 1.09              | 121           | (33,197)             | 96                        | 107             | 88.4                      |
| Abbeville, SC      | 329             | (290,369)              | 369             | 1.12              | 40            | (0,79)               | 163                       | 35              | 87.5                      |
| Aiken, SC          | 1963            | (1891,2090)            | 2230            | 1.14              | 267           | (140,339)            | 156                       | 174             | 65.2                      |
| Allendale, SC      | 129             | (109,159)              | 140             | 1.09              | 11            | (-19,31)             | 126                       | 14              | 127.3                     |
| Anderson, SC       | 2399            | (2278,2505)            | 2868            | 1.20              | 469           | (363,590)            | 229                       | 315             | 67.2                      |
| Bamberg, SC        | 208             | (177,241)              | 254             | 1.22              | 46            | (13,77)              | 328                       | 36              | 78.3                      |
| Barnwell, SC       | 268             | (239,310)              | 340             | 1.27              | 72            | (30,101)             | 349                       | 38              | 52.8                      |
| Beaufort, SC       | 1741            | (1666,1851)            | 1925            | 1.11              | 184           | (74,259)             | 95                        | 113             | 61.4                      |
| Berkeley, SC       | 1760            | (1677,1866)            | 1902            | 1.08              | 142           | (36,225)             | 60                        | 136             | 95.8                      |
| Calhoun, SC        | 185             | (157,213)              | 228             | 1.23              | 43            | (15,71)              | 303                       | 19              | 44.2                      |
| Charleston, SC     | 3465            | (3334,3602)            | 3841            | 1.11              | 376           | (239,507)            | 91                        | 305             | 81.1                      |
| Cherokee, SC       | 712             | (652,773)              | 814             | 1.14              | 102           | (41,162)             | 178                       | 88              | 86.3                      |
| Chester, SC        | 464             | (434,532)              | 571             | 1.23              | 107           | (39,137)             | 333                       | 56              | 52.3                      |
| Chesterfield, SC   | 570             | (524,631)              | 698             | 1.22              | 128           | (67,174)             | 282                       | 68              | 53.1                      |
| Clarendon, SC      | 433             | (393,486)              | 578             | 1.33              | 145           | (92,185)             | 435                       | 78              | 53.8                      |
| Colleton, SC       | 594             | (544,655)              | 663             | 1.12              | 69            | (8,119)              | 183                       | 63              | 91.3                      |
| Darlington, SC     | 911             | (863,997)              | 1046            | 1.15              | 135           | (49,183)             | 204                       | 106             | 78.5                      |
| Dillon, SC         | 403             | (363,454)              | 519             | 1.29              | 116           | (65,156)             | 378                       | 49              | 42.2                      |
| Dorchester, SC     | 1346            | (1272,1439)            | 1469            | 1.09              | 123           | (30,197)             | 75                        | 116             | 94.3                      |
| Edgefield, SC      | 257             | (222,292)              | 329             | 1.28              | 72            | (37,107)             | 263                       | 30              | 41.7                      |
| Fairfield, SC      | 311             | (273,352)              | 372             | 1.20              | 61            | (20,99)              | 277                       | 43              | 70.5                      |
| Florence, SC       | 1611            | (1562,1746)            | 2022            | 1.26              | 411           | (276,460)            | 299                       | 256             | 62.3                      |
| Georgetown, SC     | 854             | (798,928)              | 1034            | 1.21              | 180           | (106,236)            | 286                       | 97              | 53.9                      |
| Greenville, SC     | 4706            | (4529,4844)            | 5330            | 1.13              | 624           | (486,801)            | 118                       | 497             | 79.6                      |
| Greenwood, SC      | 895             | (837,973)              | 994             | 1.11              | 99            | (21,157)             | 139                       | 97              | 98.0                      |
| Hampton, SC        | 265             | (237,313)              | 291             | 1.10              | 26            | (-22,54)             | 136                       | 35              | 134.6                     |
| Horry, SC          | 4217            | (4081,4400)            | 4751            | 1.13              | 534           | (351,670)            | 145                       | 368             | 68.9                      |
| Jasper, SC         | 288             | (254,328)              | 323             | 1.12              | 35            | (-5,69)              | 115                       | 26              | 74.3                      |
| Kershaw, SC        | 730             | (673,798)              | 871             | 1.19              | 141           | (73,198)             | 212                       | 80              | 56.7                      |
| Lancaster, SC      | 1000            | (933,1070)             | 1161            | 1.16              | 161           | (91,228)             | 159                       | 113             | 70.2                      |
| Laurens, SC        | 923             | (874,1011)             | 996             | 1.08              | 73            | (-15,122)            | 109                       | 89              | 121.9                     |
| Lee, SC            | 262             | (238,310)              | 294             | 1.12              | 32            | (-16,56)             | 192                       | 56              | 175.0                     |
| Lexington, SC      | 2760            | (2655,2896)            | 3097            | 1.12              | 337           | (201,442)            | 111                       | 262             | 77.7                      |
| McCormick, SC      | 162             | (148,204)              | 157             | 0.97              | -5            | (-47,9)              | -53                       | 18              | NA                        |

Table C1: Primary Estimates for Each County

| County           | Expected Deaths | Expected Deaths 95% CI | Observed Deaths | Observed/Expected | Excess Deaths | Excess Deaths 95% CI | Excess Deaths Per 100,000 | COVID-19 Deaths | COVID-19 to Excess Ratio (%) |
|------------------|-----------------|------------------------|-----------------|-------------------|---------------|----------------------|---------------------------|-----------------|------------------------------|
| Marion, SC       | 445             | (408,504)              | 546             | 1.23              | 101           | (42,138)             | 331                       | 84              | 83.2                         |
| Marlboro, SC     | 364             | (332,416)              | 419             | 1.15              | 55            | (3,87)               | 212                       | 39              | 70.9                         |
| Newberry, SC     | 446             | (394,485)              | 591             | 1.33              | 145           | (106,197)            | 375                       | 75              | 51.7                         |
| Oconee, SC       | 1007            | (934,1076)             | 1034            | 1.03              | 27            | (-42,100)            | 34                        | 84              | 311.1                        |
| Orangeburg, SC   | 1137            | (1083,1226)            | 1364            | 1.20              | 227           | (138,281)            | 266                       | 142             | 62.6                         |
| Pickens, SC      | 1321            | (1251,1414)            | 1592            | 1.21              | 271           | (178,341)            | 213                       | 157             | 57.9                         |
| Richland, SC     | 3261            | (3131,3385)            | 3839            | 1.18              | 578           | (454,708)            | 137                       | 338             | 58.5                         |
| Saluda, SC       | 219             | (185,253)              | 308             | 1.41              | 89            | (55,123)             | 428                       | 34              | 38.2                         |
| Spartanburg, SC  | 3464            | (3315,3591)            | 3893            | 1.12              | 429           | (302,578)            | 130                       | 416             | 97.0                         |
| Sumter, SC       | 1235            | (1156,1319)            | 1435            | 1.16              | 200           | (116,279)            | 188                       | 138             | 69.0                         |
| Union, SC        | 407             | (361,448)              | 480             | 1.18              | 73            | (32,119)             | 268                       | 49              | 67.1                         |
| Williamsburg, SC | 437             | (398,490)              | 555             | 1.27              | 118           | (65,157)             | 395                       | 83              | 70.3                         |
| York, SC         | 2348            | (2235,2460)            | 2646            | 1.13              | 298           | (186,411)            | 102                       | 267             | 89.6                         |
| Aurora, SD       | 32              | (22,48)                | 46              | 1.44              | 14            | (-2,24)              | 485                       | 11              | 78.6                         |
| Beadle, SD       | 198             | (168,227)              | 218             | 1.10              | 20            | (-9,50)              | 103                       | 39              | 195.0                        |
| Bennett, SD      | 44              | (30,58)                | 38              | 0.86              | -6            | (-20,8)              | -170                      | 5               | NA                           |
| Bon Homme, SD    | 87              | (71,112)               | 118             | 1.36              | 31            | (6,47)               | 444                       | 22              | 71.0                         |
| Brookings, SD    | 197             | (167,227)              | 253             | 1.28              | 56            | (26,86)              | 154                       | 33              | 58.9                         |
| Brown, SD        | 354             | (310,390)              | 462             | 1.31              | 108           | (72,152)             | 275                       | 62              | 57.4                         |
| Brule, SD        | 47              | (33,64)                | 54              | 1.15              | 7             | (-10,21)             | 139                       | 5               | 71.4                         |
| Buffalo, SD      | 28              | (18,40)                | 36              | 1.29              | 8             | (-4,18)              | 384                       | 13              | 162.5                        |
| Butte, SD        | 113             | (92,139)               | 116             | 1.03              | 3             | (-23,24)             | 29                        | 19              | 633.3                        |
| Campbell, SD     | 14              | (7,22)                 | 21              | 1.50              | 7             | (-1,14)              | 507                       | 5               | 71.4                         |
| Charles Mix, SD  | 120             | (93,140)               | 150             | 1.25              | 30            | (10,57)              | 327                       | 16              | 53.3                         |
| Clark, SD        | 36              | (23,50)                | 45              | 1.25              | 9             | (-5,22)              | 234                       | 5               | 55.6                         |
| Clay, SD         | 107             | (85,128)               | 114             | 1.07              | 7             | (-14,29)             | 50                        | 13              | 185.7                        |
| Codington, SD    | 252             | (221,293)              | 357             | 1.42              | 105           | (64,136)             | 377                       | 70              | 66.7                         |
| Corson, SD       | 53              | (39,71)                | 68              | 1.28              | 15            | (-3,29)              | 367                       | 15              | 100.0                        |
| Custer, SD       | 110             | (89,136)               | 107             | 0.97              | -3            | (-29,18)             | -34                       | 12              | NA                           |
| Davison, SD      | 237             | (207,277)              | 255             | 1.08              | 18            | (-22,48)             | 92                        | 53              | 294.4                        |
| Day, SD          | 80              | (62,100)               | 102             | 1.27              | 22            | (2,40)               | 402                       | 26              | 118.2                        |
| Deuel, SD        | 53              | (38,69)                | 48              | 0.91              | -5            | (-21,10)             | -113                      | 5               | NA                           |
| Dewey, SD        | 59              | (42,74)                | 90              | 1.53              | 31            | (16,48)              | 516                       | 18              | 58.1                         |
| Douglas, SD      | 40              | (27,55)                | 51              | 1.27              | 11            | (-4,24)              | 372                       | 10              | 90.9                         |
| Edmunds, SD      | 39              | (24,53)                | 53              | 1.36              | 14            | (0,29)               | 370                       | 10              | 71.4                         |
| Fall River, SD   | 127             | (106,154)              | 138             | 1.09              | 11            | (-16,32)             | 160                       | 10              | 90.9                         |
| Faulk, SD        | 35              | (22,47)                | 42              | 1.20              | 7             | (-5,20)              | 301                       | 12              | 171.4                        |
| Grant, SD        | 95              | (76,119)               | 113             | 1.19              | 18            | (-6,37)              | 255                       | 33              | 183.3                        |
| Gregory, SD      | 58              | (42,75)                | 86              | 1.48              | 28            | (11,44)              | 666                       | 27              | 96.4                         |
| Haakon, SD       | 26              | (15,36)                | 26              | 1.00              | 0             | (-10,11)             | 0                         | 5               | Inf                          |
| Hamlin, SD       | 61              | (46,81)                | 103             | 1.69              | 42            | (22,57)              | 669                       | 30              | 71.4                         |
| Hand, SD         | 48              | (32,60)                | 52              | 1.08              | 4             | (-8,20)              | 124                       | 5               | 125.0                        |
| Hanson, SD       | 25              | (15,38)                | 24              | 0.96              | -1            | (-14,9)              | -30                       | 5               | NA                           |
| Hughes, SD       | 180             | (159,218)              | 204             | 1.13              | 24            | (-14,45)             | 136                       | 28              | 116.7                        |
| Hutchinson, SD   | 115             | (91,136)               | 118             | 1.03              | 3             | (-18,27)             | 41                        | 19              | 633.3                        |
| Hyde, SD         | 24              | (15,38)                | 22              | 0.92              | -2            | (-16,7)              | -161                      | 5               | NA                           |
| Jackson, SD      | 32              | (18,42)                | 48              | 1.50              | 16            | (6,30)               | 483                       | 14              | 87.5                         |
| Jerauld, SD      | 30              | (21,46)                | 36              | 1.20              | 6             | (-10,15)             | 291                       | 15              | 250.0                        |
| Kingsbury, SD    | 63              | (44,77)                | 64              | 1.02              | 1             | (-13,20)             | 20                        | 12              | 1200.0                       |
| Lake, SD         | 122             | (95,141)               | 102             | 0.84              | -20           | (-39,7)              | -147                      | 16              | NA                           |
| Lawrence, SD     | 254             | (216,287)              | 294             | 1.16              | 40            | (7,78)               | 154                       | 44              | 110.0                        |
| Lincoln, SD      | 313             | (278,353)              | 376             | 1.20              | 63            | (23,98)              | 100                       | 71              | 112.7                        |
| Lyman, SD        | 35              | (21,46)                | 54              | 1.54              | 19            | (8,33)               | 514                       | 5               | 26.3                         |
| McCook, SD       | 73              | (53,91)                | 86              | 1.18              | 13            | (-5,33)              | 232                       | 23              | 176.9                        |
| McPherson, SD    | 34              | (24,49)                | 37              | 1.09              | 3             | (-12,13)             | 125                       | 5               | 166.7                        |
| Marshall, SD     | 39              | (26,53)                | 46              | 1.18              | 7             | (-7,20)              | 131                       | 5               | 71.4                         |
| Meade, SD        | 241             | (211,282)              | 230             | 0.95              | -11           | (-52,19)             | -38                       | 22              | NA                           |
| Mellette, SD     | 33              | (21,46)                | 29              | 0.88              | -4            | (-17,8)              | -201                      | 5               | NA                           |
| Miner, SD        | 34              | (22,47)                | 32              | 0.94              | -2            | (-15,10)             | -90                       | 5               | NA                           |
| Minnehaha, SD    | 1588            | (1505,1693)            | 1893            | 1.19              | 305           | (200,388)            | 154                       | 293             | 96.1                         |
| Moody, SD        | 65              | (49,83)                | 85              | 1.31              | 20            | (2,36)               | 300                       | 17              | 85.0                         |
| Pennington, SD   | 1058            | (1007,1146)            | 1184            | 1.12              | 126           | (38,177)             | 110                       | 141             | 111.9                        |
| Perkins, SD      | 36              | (25,51)                | 53              | 1.47              | 17            | (2,28)               | 593                       | 13              | 76.5                         |
| Potter, SD       | 31              | (18,40)                | 45              | 1.45              | 14            | (5,27)               | 637                       | 5               | 35.7                         |

Table C1: Primary Estimates for Each County

| County         | Expected Deaths | Expected Deaths 95% CI | Observed Deaths | Observed/Expected | Excess Deaths | Excess Deaths 95% CI | Excess Deaths Per 100,000 | COVID-19 Deaths | COVID-19 Excess Ratio (%) |
|----------------|-----------------|------------------------|-----------------|-------------------|---------------|----------------------|---------------------------|-----------------|---------------------------|
| Roberts, SD    | 121             | (98,148)               | 134             | 1.11              | 13            | (-14,36)             | 121                       | 29              | 223.1                     |
| Sanborn, SD    | 26              | (16,39)                | 24              | 0.92              | -2            | (-15,8)              | -84                       | 5               | NA                        |
| Spink, SD      | 74              | (54,93)                | 105             | 1.42              | 31            | (12,51)              | 481                       | 24              | 77.4                      |
| Stanley, SD    | 20              | (11,31)                | 21              | 1.05              | 1             | (-10,10)             | 32                        | 5               | 500.0                     |
| Todd, SD       | 96              | (75,118)               | 132             | 1.38              | 36            | (14,57)              | 348                       | 24              | 66.7                      |
| Tripp, SD      | 81              | (64,106)               | 95              | 1.17              | 14            | (-11,31)             | 253                       | 15              | 107.1                     |
| Turner, SD     | 117             | (92,136)               | 142             | 1.21              | 25            | (6,50)               | 289                       | 43              | 172.0                     |
| Union, SD      | 146             | (123,175)              | 166             | 1.14              | 20            | (-9,43)              | 122                       | 30              | 150.0                     |
| Walworth, SD   | 79              | (55,92)                | 80              | 1.01              | 1             | (-12,25)             | 18                        | 14              | 1400.0                    |
| Yankton, SD    | 276             | (243,318)              | 265             | 0.96              | -11           | (-53,22)             | -47                       | 29              | NA                        |
| Ziebach, SD    | 20              | (12,30)                | 25              | 1.25              | 5             | (-5,13)              | 184                       | 5               | 100.0                     |
| Anderson, TN   | 1081            | (1025,1176)            | 1112            | 1.03              | 31            | (-64,87)             | 40                        | 76              | 245.2                     |
| Bedford, TN    | 554             | (507,614)              | 607             | 1.10              | 53            | (-7,100)             | 104                       | 71              | 134.0                     |
| Benton, TN     | 289             | (257,334)              | 313             | 1.08              | 24            | (-21,56)             | 144                       | 36              | 150.0                     |
| Bledsoe, TN    | 151             | (124,178)              | 175             | 1.16              | 24            | (-3,51)              | 162                       | 5               | 20.8                      |
| Blount, TN     | 1581            | (1518,1703)            | 1693            | 1.07              | 112           | (-10,175)            | 83                        | 114             | 101.8                     |
| Bradley, TN    | 1223            | (1154,1318)            | 1395            | 1.14              | 172           | (77,241)             | 157                       | 79              | 45.9                      |
| Campbell, TN   | 666             | (612,727)              | 663             | 1.00              | -3            | (-64,51)             | -8                        | 44              | NA                        |
| Cannon, TN     | 200             | (161,224)              | 214             | 1.07              | 14            | (-10,53)             | 93                        | 16              | 114.3                     |
| Carroll, TN    | 449             | (389,483)              | 527             | 1.17              | 78            | (44,138)             | 277                       | 59              | 75.6                      |
| Carter, TN     | 822             | (786,916)              | 925             | 1.13              | 103           | (9,139)              | 184                       | 91              | 88.3                      |
| Cheatham, TN   | 467             | (422,516)              | 486             | 1.04              | 19            | (-30,64)             | 47                        | 31              | 163.2                     |
| Chester, TN    | 207             | (181,244)              | 224             | 1.08              | 17            | (-20,43)             | 97                        | 35              | 205.9                     |
| Claiborne, TN  | 447             | (398,489)              | 492             | 1.10              | 45            | (3,94)               | 141                       | 25              | 55.6                      |
| Clay, TN       | 116             | (89,136)               | 168             | 1.45              | 52            | (32,79)              | 669                       | 27              | 51.9                      |
| Cocke, TN      | 592             | (550,659)              | 662             | 1.12              | 70            | (3,112)              | 193                       | 68              | 97.1                      |
| Coffee, TN     | 728             | (664,784)              | 813             | 1.12              | 85            | (29,149)             | 149                       | 86              | 101.2                     |
| Crockett, TN   | 206             | (177,239)              | 241             | 1.17              | 35            | (2,64)               | 249                       | 33              | 94.3                      |
| Cumberland, TN | 916             | (854,980)              | 1030            | 1.12              | 114           | (50,176)             | 187                       | 67              | 58.8                      |
| Davidson, TN   | 5652            | (5499,5865)            | 6521            | 1.15              | 869           | (656,1022)           | 124                       | 589             | 67.8                      |
| Decatur, TN    | 183             | (153,216)              | 242             | 1.32              | 59            | (26,89)              | 506                       | 22              | 37.3                      |
| DeKalb, TN     | 265             | (237,309)              | 316             | 1.19              | 51            | (7,79)               | 246                       | 31              | 60.8                      |
| Dickson, TN    | 653             | (600,712)              | 648             | 0.99              | -5            | (-64,48)             | -9                        | 73              | NA                        |
| Dyer, TN       | 526             | (491,595)              | 619             | 1.18              | 93            | (24,128)             | 250                       | 74              | 79.6                      |
| Fayette, TN    | 490             | (442,540)              | 536             | 1.09              | 46            | (-4,94)              | 111                       | 45              | 97.8                      |
| Fentress, TN   | 279             | (237,312)              | 324             | 1.16              | 45            | (12,87)              | 244                       | 35              | 77.8                      |
| Franklin, TN   | 523             | (473,576)              | 631             | 1.21              | 108           | (55,158)             | 254                       | 56              | 51.9                      |
| Gibson, TN     | 688             | (633,751)              | 874             | 1.27              | 186           | (123,241)            | 380                       | 97              | 52.2                      |
| Giles, TN      | 416             | (386,479)              | 490             | 1.18              | 74            | (11,104)             | 249                       | 46              | 62.2                      |
| Grainger, TN   | 323             | (284,367)              | 385             | 1.19              | 62            | (18,101)             | 267                       | 32              | 51.6                      |
| Greene, TN     | 1044            | (1003,1150)            | 1130            | 1.08              | 86            | (-20,127)            | 123                       | 92              | 107.0                     |
| Grundy, TN     | 212             | (180,244)              | 240             | 1.13              | 28            | (-4,60)              | 209                       | 19              | 67.9                      |
| Hamblen, TN    | 829             | (781,910)              | 1028            | 1.24              | 199           | (118,247)            | 304                       | 89              | 44.7                      |
| Hamilton, TN   | 3917            | (3809,4114)            | 4239            | 1.08              | 322           | (125,430)            | 87                        | 288             | 89.4                      |
| Hancock, TN    | 103             | (78,121)               | 110             | 1.07              | 7             | (-11,32)             | 108                       | 5               | 71.4                      |
| Hardeman, TN   | 323             | (291,368)              | 381             | 1.18              | 58            | (13,90)              | 233                       | 54              | 93.1                      |
| Hardin, TN     | 421             | (386,473)              | 469             | 1.11              | 48            | (-4,83)              | 186                       | 41              | 85.4                      |
| Hawkins, TN    | 791             | (747,874)              | 903             | 1.14              | 112           | (29,156)             | 198                       | 61              | 54.5                      |
| Haywood, TN    | 239             | (209,277)              | 266             | 1.11              | 27            | (-11,57)             | 160                       | 42              | 155.6                     |
| Henderson, TN  | 366             | (323,410)              | 435             | 1.19              | 69            | (25,112)             | 246                       | 59              | 85.5                      |
| Henry, TN      | 492             | (448,545)              | 571             | 1.16              | 79            | (26,123)             | 245                       | 50              | 63.3                      |
| Hickman, TN    | 318             | (280,360)              | 388             | 1.22              | 70            | (28,108)             | 275                       | 34              | 48.6                      |
| Houston, TN    | 133             | (110,163)              | 164             | 1.23              | 31            | (1,54)               | 367                       | 17              | 54.8                      |
| Humphreys, TN  | 274             | (236,307)              | 273             | 1.00              | -1            | (-34,37)             | -5                        | 19              | NA                        |
| Jackson, TN    | 175             | (144,201)              | 204             | 1.17              | 29            | (3,60)               | 243                       | 25              | 86.2                      |
| Jefferson, TN  | 702             | (642,764)              | 759             | 1.08              | 57            | (-5,117)             | 104                       | 69              | 121.1                     |
| Johnson, TN    | 298             | (274,349)              | 292             | 0.98              | -6            | (-57,18)             | -33                       | 35              | NA                        |
| Knox, TN       | 4906            | (4782,5108)            | 5380            | 1.10              | 474           | (272,598)            | 100                       | 323             | 68.1                      |
| Lake, TN       | 105             | (84,128)               | 115             | 1.10              | 10            | (-13,31)             | 137                       | 12              | 120.0                     |
| Lauderdale, TN | 327             | (297,374)              | 347             | 1.06              | 20            | (-27,50)             | 79                        | 35              | 175.0                     |
| Lawrence, TN   | 617             | (560,672)              | 716             | 1.16              | 99            | (44,156)             | 222                       | 67              | 67.7                      |
| Lewis, TN      | 175             | (151,210)              | 201             | 1.15              | 26            | (-9,50)              | 213                       | 18              | 69.2                      |
| Lincoln, TN    | 475             | (431,529)              | 531             | 1.12              | 56            | (2,100)              | 161                       | 45              | 80.4                      |
| Loudon, TN     | 729             | (682,801)              | 729             | 1.00              | 0             | (-72,47)             | 0                         | 50              | Inf                       |

Table C1: Primary Estimates for Each County

| County         | Expected Deaths | Expected Deaths 95% CI | Observed Deaths | Observed/Expected | Excess Deaths | Excess Deaths 95% CI | Excess Deaths Per 100,000 | COVID-19 Deaths | COVID-19 Excess Ratio (%) |
|----------------|-----------------|------------------------|-----------------|-------------------|---------------|----------------------|---------------------------|-----------------|---------------------------|
| McMinn, TN     | 735             | (687,806)              | 857             | 1.17              | 122           | (51,170)             | 226                       | 65              | 53.3                      |
| McNairy, TN    | 422             | (375,474)              | 471             | 1.12              | 49            | (-3,96)              | 192                       | 39              | 79.6                      |
| Macon, TN      | 289             | (244,315)              | 354             | 1.22              | 65            | (39,110)             | 260                       | 43              | 66.2                      |
| Madison, TN    | 1155            | (1083,1233)            | 1310            | 1.13              | 155           | (77,227)             | 159                       | 170             | 109.7                     |
| Marion, TN     | 403             | (354,443)              | 424             | 1.05              | 21            | (-19,70)             | 73                        | 38              | 181.0                     |
| Marshall, TN   | 398             | (355,439)              | 443             | 1.11              | 45            | (4,88)               | 128                       | 34              | 75.6                      |
| Maurry, TN     | 1077            | (1013,1159)            | 1081            | 1.00              | 4             | (-78,68)             | 4                         | 116             | 2900.0                    |
| Meigs, TN      | 193             | (169,232)              | 192             | 0.99              | -1            | (-40,23)             | -8                        | 18              | NA                        |
| Monroe, TN     | 654             | (616,732)              | 720             | 1.10              | 66            | (-12,104)            | 141                       | 59              | 89.4                      |
| Montgomery, TN | 1591            | (1513,1680)            | 1750            | 1.10              | 159           | (70,237)             | 73                        | 125             | 78.6                      |
| Moore, TN      | 69              | (49,87)                | 81              | 1.17              | 12            | (-6,32)              | 185                       | 5               | 41.7                      |
| Morgan, TN     | 277             | (245,319)              | 261             | 0.94              | -16           | (-58,16)             | -74                       | 13              | NA                        |
| Obion, TN      | 392             | (357,447)              | 525             | 1.34              | 133           | (78,168)             | 444                       | 80              | 60.2                      |
| Overton, TN    | 344             | (309,390)              | 392             | 1.14              | 48            | (2,83)               | 216                       | 48              | 100.0                     |
| Perry, TN      | 144             | (112,163)              | 135             | 0.94              | -9            | (-28,23)             | -109                      | 20              | NA                        |
| Pickett, TN    | 85              | (68,110)               | 89              | 1.05              | 4             | (-21,21)             | 78                        | 20              | 500.0                     |
| Polk, TN       | 254             | (225,295)              | 276             | 1.09              | 22            | (-19,51)             | 128                       | 13              | 59.1                      |
| Putnam, TN     | 912             | (833,969)              | 1070            | 1.17              | 158           | (101,237)            | 193                       | 127             | 80.4                      |
| Rhea, TN       | 487             | (427,529)              | 503             | 1.03              | 16            | (-26,76)             | 48                        | 51              | 318.8                     |
| Roane, TN      | 829             | (781,918)              | 877             | 1.06              | 48            | (-41,96)             | 90                        | 61              | 127.1                     |
| Robertson, TN  | 740             | (681,798)              | 886             | 1.20              | 146           | (88,205)             | 201                       | 83              | 56.8                      |
| Rutherford, TN | 2334            | (2241,2463)            | 2649            | 1.13              | 315           | (186,408)            | 92                        | 250             | 79.4                      |
| Scott, TN      | 292             | (255,327)              | 284             | 0.97              | -8            | (-43,29)             | -36                       | 30              | NA                        |
| Sequatchie, TN | 170             | (141,197)              | 188             | 1.11              | 18            | (-9,47)              | 119                       | 12              | 66.7                      |
| Sevier, TN     | 1204            | (1143,1294)            | 1286            | 1.07              | 82            | (-8,143)             | 83                        | 88              | 107.3                     |
| Shelby, TN     | 8791            | (8620,9088)            | 10654           | 1.21              | 1863          | (1566,2034)          | 199                       | 1042            | 55.9                      |
| Smith, TN      | 223             | (198,263)              | 264             | 1.18              | 41            | (1,66)               | 200                       | 25              | 61.0                      |
| Stewart, TN    | 173             | (149,207)              | 192             | 1.11              | 19            | (-15,43)             | 136                       | 22              | 115.8                     |
| Sullivan, TN   | 2209            | (2108,2330)            | 2531            | 1.15              | 322           | (201,423)            | 202                       | 205             | 63.7                      |
| Sumner, TN     | 1816            | (1732,1926)            | 2026            | 1.12              | 210           | (100,294)            | 108                       | 210             | 100.0                     |
| Tipton, TN     | 685             | (630,742)              | 710             | 1.04              | 25            | (-32,80)             | 40                        | 65              | 260.0                     |
| Trousdale, TN  | 99              | (70,114)               | 130             | 1.31              | 31            | (16,60)              | 273                       | 13              | 41.9                      |
| Unicoi, TN     | 317             | (283,365)              | 346             | 1.09              | 29            | (-19,63)             | 163                       | 27              | 93.1                      |
| Union, TN      | 242             | (204,271)              | 298             | 1.23              | 56            | (27,94)              | 276                       | 17              | 30.4                      |
| Van Buren, TN  | 102             | (89,135)               | 94              | 0.92              | -8            | (-41,5)              | -136                      | 5               | NA                        |
| Warren, TN     | 536             | (488,592)              | 584             | 1.09              | 48            | (-8,96)              | 116                       | 54              | 112.5                     |
| Washington, TN | 1565            | (1492,1670)            | 1811            | 1.16              | 246           | (141,319)            | 189                       | 161             | 65.4                      |
| Wayne, TN      | 228             | (195,259)              | 231             | 1.01              | 3             | (-28,36)             | 18                        | 20              | 666.7                     |
| Weakley, TN    | 418             | (378,470)              | 449             | 1.07              | 31            | (-21,71)             | 92                        | 38              | 122.6                     |
| White, TN      | 396             | (345,429)              | 424             | 1.07              | 28            | (-5,79)              | 101                       | 34              | 121.4                     |
| Williamson, TN | 1529            | (1454,1631)            | 1627            | 1.06              | 98            | (-4,173)             | 40                        | 144             | 146.9                     |
| Wilson, TN     | 1269            | (1204,1357)            | 1525            | 1.20              | 256           | (168,321)            | 172                       | 150             | 58.6                      |
| Anderson, TX   | 696             | (644,760)              | 737             | 1.06              | 41            | (-23,93)             | 71                        | 95              | 231.7                     |
| Andrews, TX    | 135             | (108,155)              | 156             | 1.16              | 21            | (1,48)               | 110                       | 34              | 161.9                     |
| Angelina, TX   | 947             | (887,1024)             | 1162            | 1.23              | 215           | (138,275)            | 250                       | 173             | 80.5                      |
| Aransas, TX    | 290             | (257,332)              | 438             | 1.51              | 148           | (106,181)            | 706                       | 26              | 17.6                      |
| Archer, TX     | 100             | (80,125)               | 89              | 0.89              | -11           | (-36,9)              | -125                      | 5               | NA                        |
| Armstrong, TX  | 29              | (16,40)                | 38              | 1.31              | 9             | (-2,22)              | 470                       | 5               | 55.6                      |
| Atascosa, TX   | 448             | (401,498)              | 573             | 1.28              | 125           | (75,172)             | 237                       | 95              | 76.0                      |
| Austin, TX     | 299             | (265,341)              | 324             | 1.08              | 25            | (-17,59)             | 82                        | 20              | 80.0                      |
| Bailey, TX     | 58              | (45,78)                | 75              | 1.29              | 17            | (-3,30)              | 244                       | 17              | 100.0                     |
| Bandera, TX    | 292             | (262,339)              | 312             | 1.07              | 20            | (-27,50)             | 84                        | 17              | 85.0                      |
| Bastrop, TX    | 767             | (699,827)              | 826             | 1.08              | 59            | (-1,127)             | 65                        | 53              | 89.8                      |
| Baylor, TX     | 70              | (55,91)                | 69              | 0.99              | -1            | (-22,14)             | -27                       | 5               | NA                        |
| Bee, TX        | 295             | (258,332)              | 321             | 1.09              | 26            | (-11,63)             | 80                        | 54              | 207.7                     |
| Bell, TX       | 2567            | (2462,2690)            | 2832            | 1.10              | 265           | (142,370)            | 71                        | 221             | 83.4                      |
| Bexar, TX      | 14500           | (14232,14842)          | 16704           | 1.15              | 2204          | (1862,2472)          | 108                       | 2082            | 94.5                      |
| Blanco, TX     | 140             | (113,165)              | 133             | 0.95              | -7            | (-32,20)             | -58                       | 5               | NA                        |
| Bosque, TX     | 275             | (243,321)              | 334             | 1.21              | 59            | (13,91)              | 303                       | 22              | 37.3                      |
| Bowie, TX      | 1130            | (1057,1199)            | 1243            | 1.10              | 113           | (44,186)             | 119                       | 137             | 121.2                     |
| Brazoria, TX   | 2561            | (2467,2678)            | 2882            | 1.13              | 321           | (204,415)            | 83                        | 256             | 79.8                      |
| Brazos, TX     | 1152            | (1071,1229)            | 1347            | 1.17              | 195           | (118,276)            | 84                        | 155             | 79.5                      |
| Brewster, TX   | 91              | (73,114)               | 102             | 1.12              | 11            | (-12,29)             | 120                       | 12              | 109.1                     |
| Briscoe, TX    | 19              | (10,30)                | 28              | 1.47              | 9             | (-2,18)              | 596                       | 5               | 55.6                      |

Table C1: Primary Estimates for Each County

| County            | Expected Deaths | Expected Deaths 95% CI | Observed Deaths | Observed/Expected | Excess Deaths | Excess Deaths 95% CI | Excess Deaths Per 100,000 | COVID-19 Deaths | COVID-19 Excess Ratio (%) |
|-------------------|-----------------|------------------------|-----------------|-------------------|---------------|----------------------|---------------------------|-----------------|---------------------------|
| Brooks, TX        | 81              | (62,102)               | 116             | 1.43              | 35            | (14,54)              | 497                       | 31              | 88.6                      |
| Brown, TX         | 516             | (471,574)              | 671             | 1.30              | 155           | (97,200)             | 408                       | 89              | 57.4                      |
| Burleson, TX      | 263             | (229,305)              | 257             | 0.98              | -6            | (-48,28)             | -32                       | 22              | NA                        |
| Burnet, TX        | 581             | (529,630)              | 593             | 1.02              | 12            | (-37,64)             | 24                        | 40              | 333.3                     |
| Caldwell, TX      | 416             | (375,468)              | 482             | 1.16              | 66            | (14,107)             | 147                       | 53              | 80.3                      |
| Calhoun, TX       | 207             | (178,241)              | 253             | 1.22              | 46            | (12,75)              | 218                       | 12              | 26.1                      |
| Callahan, TX      | 183             | (153,210)              | 234             | 1.28              | 51            | (24,81)              | 363                       | 28              | 54.9                      |
| Cameron, TX       | 2923            | (2823,3046)            | 4243            | 1.45              | 1320          | (1197,1420)          | 310                       | 1136            | 86.1                      |
| Camp, TX          | 146             | (122,175)              | 201             | 1.38              | 55            | (26,79)              | 412                       | 25              | 45.5                      |
| Carson, TX        | 59              | (42,76)                | 97              | 1.64              | 38            | (21,55)              | 634                       | 15              | 39.5                      |
| Cass, TX          | 427             | (383,475)              | 541             | 1.27              | 114           | (66,158)             | 375                       | 64              | 56.1                      |
| Castro, TX        | 65              | (48,83)                | 87              | 1.34              | 22            | (4,39)               | 294                       | 24              | 109.1                     |
| Chambers, TX      | 303             | (260,337)              | 386             | 1.27              | 83            | (49,126)             | 186                       | 32              | 38.6                      |
| Cherokee, TX      | 602             | (544,652)              | 687             | 1.14              | 85            | (35,143)             | 159                       | 102             | 120.0                     |
| Childress, TX     | 79              | (63,100)               | 86              | 1.09              | 7             | (-14,23)             | 96                        | 13              | 185.7                     |
| Clay, TX          | 133             | (111,161)              | 147             | 1.11              | 14            | (-14,36)             | 135                       | 15              | 107.1                     |
| Cochran, TX       | 27              | (17,39)                | 37              | 1.37              | 10            | (-2,20)              | 357                       | 11              | 110.0                     |
| Coke, TX          | 53              | (37,68)                | 62              | 1.17              | 9             | (-6,25)              | 257                       | 13              | 144.4                     |
| Coleman, TX       | 152             | (134,191)              | 152             | 1.00              | 0             | (-39,18)             | 0                         | 17              | Inf                       |
| Collin, TX        | 5200            | (5069,5384)            | 5721            | 1.10              | 521           | (337,652)            | 48                        | 483             | 92.7                      |
| Collingsworth, TX | 36              | (23,49)                | 48              | 1.33              | 12            | (-1,25)              | 409                       | 5               | 41.7                      |
| Colorado, TX      | 252             | (221,291)              | 306             | 1.21              | 54            | (15,85)              | 255                       | 19              | 35.2                      |
| Comal, TX         | 1433            | (1347,1514)            | 1614            | 1.13              | 181           | (100,267)            | 110                       | 150             | 82.9                      |
| Comanche, TX      | 197             | (166,229)              | 238             | 1.21              | 41            | (9,72)               | 304                       | 37              | 90.2                      |
| Concho, TX        | 51              | (40,73)                | 34              | 0.67              | -17           | (-39,-6)             | -403                      | 5               | NA                        |
| Cooke, TX         | 434             | (389,484)              | 491             | 1.13              | 57            | (7,102)              | 137                       | 43              | 75.4                      |
| Coryell, TX       | 552             | (507,604)              | 612             | 1.11              | 60            | (8,105)              | 80                        | 44              | 73.3                      |
| Cottle, TX        | 25              | (11,31)                | 35              | 1.40              | 10            | (4,24)               | 713                       | 5               | 50.0                      |
| Crane, TX         | 37              | (25,52)                | 48              | 1.30              | 11            | (-4,23)              | 222                       | 5               | 45.5                      |
| Crockett, TX      | 40              | (29,58)                | 61              | 1.52              | 21            | (3,32)               | 619                       | 11              | 52.4                      |
| Crosby, TX        | 77              | (58,97)                | 97              | 1.26              | 20            | (0,39)               | 357                       | 24              | 120.0                     |
| Culberson, TX     | 24              | (15,38)                | 36              | 1.50              | 12            | (-2,21)              | 560                       | 5               | 41.7                      |
| Dallam, TX        | 40              | (28,54)                | 80              | 2.00              | 40            | (26,52)              | 557                       | 15              | 37.5                      |
| Dallas, TX        | 17059           | (16750,17408)          | 20063           | 1.18              | 3004          | (2655,3313)          | 113                       | 2481            | 82.6                      |
| Dawson, TX        | 136             | (111,163)              | 193             | 1.42              | 57            | (30,82)              | 462                       | 57              | 100.0                     |
| Deaf Smith, TX    | 153             | (127,184)              | 206             | 1.35              | 53            | (22,79)              | 285                       | 61              | 115.1                     |
| Delta, TX         | 74              | (53,89)                | 90              | 1.22              | 16            | (1,37)               | 292                       | 5               | 31.2                      |
| Denton, TX        | 4266            | (4136,4429)            | 4863            | 1.14              | 597           | (434,727)            | 66                        | 436             | 73.0                      |
| DeWitt, TX        | 284             | (255,330)              | 305             | 1.07              | 21            | (-25,50)             | 104                       | 54              | 257.1                     |
| Dickens, TX       | 31              | (20,44)                | 42              | 1.35              | 11            | (-2,22)              | 471                       | 5               | 45.5                      |
| Dimmit, TX        | 95              | (76,118)               | 107             | 1.13              | 12            | (-11,31)             | 117                       | 13              | 108.3                     |
| Donley, TX        | 49              | (36,68)                | 55              | 1.12              | 6             | (-13,19)             | 184                       | 5               | 83.3                      |
| Duval, TX         | 134             | (106,154)              | 137             | 1.02              | 3             | (-17,31)             | 27                        | 26              | 866.7                     |
| Eastland, TX      | 265             | (228,304)              | 279             | 1.05              | 14            | (-25,51)             | 77                        | 18              | 128.6                     |
| Ector, TX         | 1265            | (1184,1346)            | 1629            | 1.29              | 364           | (283,445)            | 211                       | 289             | 79.4                      |
| Edwards, TX       | 29              | (17,40)                | 34              | 1.17              | 5             | (-6,17)              | 263                       | 5               | 100.0                     |
| Ellis, TX         | 1439            | (1350,1519)            | 1675            | 1.16              | 236           | (156,325)            | 123                       | 189             | 80.1                      |
| El Paso, TX       | 5804            | (5678,6019)            | 8435            | 1.45              | 2631          | (2416,2757)          | 313                       | 2173            | 82.6                      |
| Erath, TX         | 364             | (321,404)              | 365             | 1.00              | 1             | (-39,44)             | 2                         | 43              | 4300.0                    |
| Falls, TX         | 192             | (160,222)              | 199             | 1.04              | 7             | (-23,39)             | 41                        | 24              | 342.9                     |
| Fannin, TX        | 485             | (431,524)              | 491             | 1.01              | 6             | (-33,60)             | 16                        | 69              | 1150.0                    |
| Fayette, TX       | 331             | (285,364)              | 378             | 1.14              | 47            | (14,93)              | 183                       | 40              | 85.1                      |
| Fisher, TX        | 39              | (27,52)                | 70              | 1.79              | 31            | (18,43)              | 835                       | 13              | 41.9                      |
| Floyd, TX         | 66              | (48,84)                | 110             | 1.67              | 44            | (26,62)              | 761                       | 30              | 68.2                      |
| Foard, TX         | 24              | (16,37)                | 31              | 1.29              | 7             | (-6,15)              | 589                       | 5               | 71.4                      |
| Fort Bend, TX     | 3817            | (3698,3972)            | 4565            | 1.20              | 748           | (593,867)            | 90                        | 461             | 61.6                      |
| Franklin, TX      | 130             | (106,154)              | 160             | 1.23              | 30            | (6,54)               | 279                       | 15              | 50.0                      |
| Freestone, TX     | 226             | (199,267)              | 281             | 1.24              | 55            | (14,82)              | 273                       | 34              | 61.8                      |
| Frio, TX          | 150             | (122,175)              | 191             | 1.27              | 41            | (16,69)              | 202                       | 22              | 53.7                      |
| Gaines, TX        | 121             | (98,145)               | 167             | 1.38              | 46            | (22,69)              | 215                       | 33              | 71.7                      |
| Galveston, TX     | 3030            | (2901,3153)            | 3348            | 1.10              | 318           | (195,447)            | 92                        | 239             | 75.2                      |
| Garza, TX         | 48              | (32,63)                | 67              | 1.40              | 19            | (4,35)               | 287                       | 16              | 84.2                      |
| Gillespie, TX     | 376             | (335,423)              | 389             | 1.03              | 13            | (-34,54)             | 48                        | 27              | 207.7                     |
| Goliad, TX        | 89              | (66,109)               | 75              | 0.84              | -14           | (-34,9)              | -183                      | 5               | NA                        |

Table C1: Primary Estimates for Each County

| County         | Expected Deaths | Expected Deaths 95% CI | Observed Deaths | Observed/Expected | Excess Deaths | Excess Deaths 95% CI | Excess Deaths Per 100,000 | COVID-19 Deaths | COVID-19 Excess Ratio (%) |
|----------------|-----------------|------------------------|-----------------|-------------------|---------------|----------------------|---------------------------|-----------------|---------------------------|
| Gonzales, TX   | 220             | (194,260)              | 260             | 1.18              | 40            | (0,66)               | 192                       | 29              | 72.5                      |
| Gray, TX       | 274             | (239,311)              | 296             | 1.08              | 22            | (-15,57)             | 103                       | 43              | 195.5                     |
| Grayson, TX    | 1580            | (1466,1653)            | 1795            | 1.14              | 215           | (142,329)            | 154                       | 208             | 96.7                      |
| Gregg, TX      | 1393            | (1320,1494)            | 1642            | 1.18              | 249           | (148,322)            | 199                       | 187             | 75.1                      |
| Grimes, TX     | 303             | (266,343)              | 355             | 1.17              | 52            | (12,89)              | 179                       | 53              | 101.9                     |
| Guadalupe, TX  | 1257            | (1187,1342)            | 1380            | 1.10              | 123           | (38,193)             | 72                        | 131             | 106.5                     |
| Hale, TX       | 336             | (299,380)              | 454             | 1.35              | 118           | (74,155)             | 353                       | 134             | 113.6                     |
| Hall, TX       | 40              | (25,52)                | 53              | 1.32              | 13            | (1,28)               | 439                       | 5               | 38.5                      |
| Hamilton, TX   | 145             | (114,168)              | 122             | 0.84              | -23           | (-46,8)              | -266                      | 16              | NA                        |
| Hansford, TX   | 49              | (34,67)                | 58              | 1.18              | 9             | (-9,24)              | 166                       | 19              | 211.1                     |
| Hardeman, TX   | 54              | (39,70)                | 76              | 1.41              | 22            | (6,37)               | 573                       | 10              | 45.5                      |
| Hardin, TX     | 626             | (583,690)              | 670             | 1.07              | 44            | (-20,87)             | 77                        | 59              | 134.1                     |
| Harris, TX     | 27880           | (27509,28366)          | 32980           | 1.18              | 5100          | (4614,5471)          | 107                       | 3871            | 75.9                      |
| Harrison, TX   | 711             | (647,767)              | 789             | 1.11              | 78            | (22,142)             | 116                       | 90              | 115.4                     |
| Hartley, TX    | 49              | (32,62)                | 54              | 1.10              | 5             | (-8,22)              | 92                        | 12              | 240.0                     |
| Haskell, TX    | 75              | (59,97)                | 84              | 1.12              | 9             | (-13,25)             | 153                       | 16              | 177.8                     |
| Hays, TX       | 1297            | (1214,1375)            | 1349            | 1.04              | 52            | (-26,135)            | 22                        | 110             | 211.5                     |
| Hemphill, TX   | 32              | (20,45)                | 24              | 0.75              | -8            | (-21,4)              | -222                      | 5               | NA                        |
| Henderson, TX  | 1221            | (1141,1303)            | 1326            | 1.09              | 105           | (23,185)             | 124                       | 110             | 104.8                     |
| Hidalgo, TX    | 4841            | (4711,5017)            | 7270            | 1.50              | 2429          | (2253,2559)          | 276                       | 2097            | 86.3                      |
| Hill, TX       | 501             | (448,548)              | 527             | 1.05              | 26            | (-21,79)             | 69                        | 44              | 169.2                     |
| Hockley, TX    | 229             | (199,263)              | 324             | 1.41              | 95            | (61,125)             | 414                       | 93              | 97.9                      |
| Hood, TX       | 844             | (761,892)              | 903             | 1.07              | 59            | (11,142)             | 90                        | 86              | 145.8                     |
| Hopkins, TX    | 440             | (401,496)              | 524             | 1.19              | 84            | (28,123)             | 224                       | 89              | 106.0                     |
| Houston, TX    | 303             | (264,342)              | 355             | 1.17              | 52            | (13,91)              | 223                       | 29              | 55.8                      |
| Howard, TX     | 379             | (325,409)              | 467             | 1.23              | 88            | (58,142)             | 238                       | 90              | 102.3                     |
| Hudspeth, TX   | 32              | (22,46)                | 39              | 1.22              | 7             | (-7,17)              | 135                       | 5               | 71.4                      |
| Hunt, TX       | 1063            | (982,1122)             | 1163            | 1.09              | 100           | (41,181)             | 98                        | 101             | 101.0                     |
| Hutchinson, TX | 249             | (215,284)              | 318             | 1.28              | 69            | (34,103)             | 331                       | 57              | 82.6                      |
| Irion, TX      | 14              | (7,24)                 | 19              | 1.36              | 5             | (-5,12)              | 324                       | 0               | 0.0                       |
| Jack, TX       | 107             | (87,130)               | 104             | 0.97              | -3            | (-26,17)             | -34                       | 13              | NA                        |
| Jackson, TX    | 167             | (140,195)              | 184             | 1.10              | 17            | (-11,44)             | 113                       | 24              | 141.2                     |
| Jasper, TX     | 478             | (427,524)              | 531             | 1.11              | 53            | (7,104)              | 145                       | 56              | 105.7                     |
| Jeff Davis, TX | 22              | (13,34)                | 29              | 1.32              | 7             | (-5,16)              | 316                       | 5               | 71.4                      |
| Jefferson, TX  | 2560            | (2443,2674)            | 2967            | 1.16              | 407           | (293,524)            | 162                       | 289             | 71.0                      |
| Jim Hogg, TX   | 53              | (38,70)                | 60              | 1.13              | 7             | (-10,22)             | 133                       | 13              | 185.7                     |
| Jim Wells, TX  | 416             | (372,462)              | 494             | 1.19              | 78            | (32,122)             | 192                       | 74              | 94.9                      |
| Johnson, TX    | 1612            | (1537,1713)            | 1839            | 1.14              | 227           | (126,302)            | 126                       | 183             | 80.6                      |
| Jones, TX      | 174             | (142,198)              | 263             | 1.51              | 89            | (65,121)             | 451                       | 41              | 46.1                      |
| Karnes, TX     | 147             | (126,178)              | 189             | 1.29              | 42            | (11,63)              | 264                       | 24              | 57.1                      |
| Kaufman, TX    | 1165            | (1093,1247)            | 1282            | 1.10              | 117           | (35,189)             | 83                        | 143             | 122.2                     |
| Kendall, TX    | 407             | (350,442)              | 456             | 1.12              | 49            | (14,106)             | 100                       | 40              | 81.6                      |
| Kerr, TX       | 775             | (703,828)              | 831             | 1.07              | 56            | (3,128)              | 105                       | 57              | 101.8                     |
| Kimble, TX     | 66              | (50,85)                | 65              | 0.98              | -1            | (-20,15)             | -23                       | 5               | NA                        |
| Kinney, TX     | 47              | (33,63)                | 47              | 1.00              | 0             | (-16,14)             | 0                         | 5               | Inf                       |
| Kleberg, TX    | 317             | (291,369)              | 349             | 1.10              | 32            | (-20,58)             | 103                       | 67              | 209.4                     |
| Knox, TX       | 53              | (35,65)                | 75              | 1.42              | 22            | (10,40)              | 612                       | 12              | 54.5                      |
| Lamar, TX      | 650             | (587,702)              | 791             | 1.22              | 141           | (89,204)             | 282                       | 103             | 73.0                      |
| Lamb, TX       | 152             | (131,184)              | 225             | 1.48              | 73            | (41,94)              | 558                       | 70              | 95.9                      |
| Lampasas, TX   | 236             | (207,275)              | 286             | 1.21              | 50            | (11,79)              | 229                       | 14              | 28.0                      |
| La Salle, TX   | 53              | (37,68)                | 77              | 1.45              | 24            | (9,40)               | 322                       | 21              | 87.5                      |
| Lavaca, TX     | 277             | (236,308)              | 319             | 1.15              | 42            | (11,83)              | 207                       | 52              | 123.8                     |
| Lee, TX        | 199             | (163,225)              | 227             | 1.14              | 28            | (2,64)               | 163                       | 32              | 114.3                     |
| Leon, TX       | 220             | (188,252)              | 252             | 1.15              | 32            | (0,64)               | 185                       | 24              | 75.0                      |
| Liberty, TX    | 942             | (867,1005)             | 888             | 0.94              | -54           | (-117,21)            | -59                       | 103             | NA                        |
| Limestone, TX  | 293             | (255,332)              | 338             | 1.15              | 45            | (6,83)               | 191                       | 32              | 71.1                      |
| Lipscomb, TX   | 28              | (18,42)                | 36              | 1.29              | 8             | (-6,18)              | 241                       | 10              | 125.0                     |
| Live Oak, TX   | 127             | (98,146)               | 157             | 1.24              | 30            | (11,59)              | 247                       | 18              | 60.0                      |
| Llano, TX      | 354             | (315,401)              | 378             | 1.07              | 24            | (-23,63)             | 106                       | 21              | 87.5                      |
| Lubbock, TX    | 2720            | (2608,2854)            | 3481            | 1.28              | 761           | (627,873)            | 244                       | 664             | 87.3                      |
| Lynn, TX       | 64              | (50,84)                | 94              | 1.47              | 30            | (10,44)              | 504                       | 18              | 60.0                      |
| McCulloch, TX  | 110             | (88,135)               | 125             | 1.14              | 15            | (-10,37)             | 187                       | 13              | 86.7                      |
| McLennan, TX   | 2335            | (2222,2447)            | 2748            | 1.18              | 413           | (301,526)            | 158                       | 340             | 82.3                      |
| Madison, TX    | 160             | (132,191)              | 168             | 1.05              | 8             | (-23,36)             | 54                        | 21              | 262.5                     |



Table C1: Primary Estimates for Each County

| County            | Expected Deaths | Expected Deaths 95% CI | Observed Deaths | Observed/Expected | Excess Deaths | Excess Deaths 95% CI | Excess Deaths Per 100,000 | COVID-19 Deaths | COVID-19 Excess Ratio (%) |
|-------------------|-----------------|------------------------|-----------------|-------------------|---------------|----------------------|---------------------------|-----------------|---------------------------|
| Marion, TX        | 161             | (131,188)              | 187             | 1.16              | 26            | (-1,56)              | 270                       | 24              | 92.3                      |
| Martin, TX        | 58              | (41,75)                | 66              | 1.14              | 8             | (-9,25)              | 130                       | 18              | 225.0                     |
| Mason, TX         | 57              | (42,75)                | 48              | 0.84              | -9            | (-27,6)              | -203                      | 5               | NA                        |
| Matagorda, TX     | 428             | (388,478)              | 467             | 1.09              | 39            | (-11,79)             | 108                       | 73              | 187.2                     |
| Maverick, TX      | 421             | (379,471)              | 690             | 1.64              | 269           | (219,311)            | 456                       | 223             | 82.9                      |
| Medina, TX        | 487             | (441,542)              | 522             | 1.07              | 35            | (-20,81)             | 67                        | 61              | 174.3                     |
| Menard, TX        | 38              | (25,51)                | 41              | 1.08              | 3             | (-10,16)             | 138                       | 5               | 166.7                     |
| Midland, TX       | 1211            | (1140,1290)            | 1316            | 1.09              | 105           | (26,176)             | 56                        | 211             | 201.0                     |
| Milam, TX         | 317             | (279,358)              | 308             | 0.97              | -9            | (-50,29)             | -35                       | 24              | NA                        |
| Mills, TX         | 78              | (64,107)               | 78              | 1.00              | 0             | (-29,14)             | 0                         | 14              | Inf                       |
| Mitchell, TX      | 93              | (70,114)               | 92              | 0.99              | -1            | (-22,22)             | -13                       | 18              | NA                        |
| Montague, TX      | 288             | (260,334)              | 375             | 1.30              | 87            | (41,115)             | 437                       | 45              | 51.7                      |
| Montgomery, TX    | 4337            | (4187,4479)            | 4688            | 1.08              | 351           | (209,501)            | 56                        | 312             | 88.9                      |
| Moore, TX         | 157             | (127,183)              | 197             | 1.25              | 40            | (14,70)              | 193                       | 67              | 167.5                     |
| Morris, TX        | 193             | (165,227)              | 196             | 1.02              | 3             | (-31,31)             | 24                        | 15              | 500.0                     |
| Motley, TX        | 20              | (12,33)                | 23              | 1.15              | 3             | (-10,11)             | 241                       | 5               | 166.7                     |
| Nacogdoches, TX   | 602             | (550,657)              | 760             | 1.26              | 158           | (103,210)            | 240                       | 110             | 69.6                      |
| Navarro, TX       | 615             | (563,672)              | 635             | 1.03              | 20            | (-37,72)             | 39                        | 81              | 405.0                     |
| Newton, TX        | 156             | (129,181)              | 214             | 1.37              | 58            | (33,85)              | 434                       | 20              | 34.5                      |
| Nolan, TX         | 180             | (156,218)              | 229             | 1.27              | 49            | (11,73)              | 336                       | 34              | 69.4                      |
| Nueces, TX        | 3050            | (2941,3175)            | 3792            | 1.24              | 742           | (617,851)            | 203                       | 527             | 71.0                      |
| Ochiltree, TX     | 68              | (49,84)                | 107             | 1.57              | 39            | (23,58)              | 401                       | 20              | 51.3                      |
| Oldham, TX        | 18              | (9,27)                 | 20              | 1.11              | 2             | (-7,11)              | 92                        | 5               | 250.0                     |
| Orange, TX        | 1000            | (929,1070)             | 1152            | 1.15              | 152           | (82,223)             | 188                       | 83              | 54.6                      |
| Palo Pinto, TX    | 363             | (318,402)              | 457             | 1.26              | 94            | (55,139)             | 319                       | 56              | 59.6                      |
| Panola, TX        | 281             | (247,319)              | 391             | 1.39              | 110           | (72,144)             | 478                       | 48              | 43.6                      |
| Parker, TX        | 1328            | (1264,1423)            | 1424            | 1.07              | 96            | (1,160)              | 65                        | 127             | 132.3                     |
| Parmar, TX        | 83              | (62,104)               | 121             | 1.46              | 38            | (17,59)              | 380                       | 40              | 105.3                     |
| Pecos, TX         | 127             | (103,154)              | 194             | 1.53              | 67            | (40,91)              | 425                       | 28              | 41.8                      |
| Polk, TX          | 725             | (649,769)              | 837             | 1.15              | 112           | (68,188)             | 215                       | 70              | 62.5                      |
| Potter, TX        | 1279            | (1224,1391)            | 1644            | 1.29              | 365           | (253,420)            | 309                       | 310             | 84.9                      |
| Presidio, TX      | 52              | (38,70)                | 66              | 1.27              | 14            | (-4,28)              | 213                       | 21              | 150.0                     |
| Rains, TX         | 180             | (146,206)              | 193             | 1.07              | 13            | (-13,47)             | 100                       | 21              | 161.5                     |
| Randall, TX       | 1140            | (1066,1218)            | 1407            | 1.23              | 267           | (189,341)            | 191                       | 217             | 81.3                      |
| Reagan, TX        | 27              | (16,38)                | 34              | 1.26              | 7             | (-4,18)              | 183                       | 5               | 71.4                      |
| Real, TX          | 53              | (38,68)                | 72              | 1.36              | 19            | (4,34)               | 531                       | 12              | 63.2                      |
| Red River, TX     | 183             | (163,224)              | 255             | 1.39              | 72            | (31,92)              | 594                       | 30              | 41.7                      |
| Reeves, TX        | 124             | (102,151)              | 150             | 1.21              | 26            | (-1,48)              | 157                       | 32              | 123.1                     |
| Refugio, TX       | 81              | (58,98)                | 110             | 1.36              | 29            | (12,52)              | 431                       | 18              | 62.1                      |
| Robertson, TX     | 201             | (171,233)              | 235             | 1.17              | 34            | (2,64)               | 195                       | 23              | 67.6                      |
| Rockwall, TX      | 692             | (638,749)              | 753             | 1.09              | 61            | (4,115)              | 56                        | 67              | 109.8                     |
| Runnels, TX       | 138             | (116,167)              | 163             | 1.18              | 25            | (-4,47)              | 249                       | 25              | 100.0                     |
| Rusk, TX          | 551             | (501,603)              | 684             | 1.24              | 133           | (81,183)             | 243                       | 83              | 62.4                      |
| Sabine, TX        | 180             | (149,208)              | 194             | 1.08              | 14            | (-14,45)             | 129                       | 19              | 135.7                     |
| San Augustine, TX | 122             | (99,148)               | 174             | 1.43              | 52            | (26,75)              | 641                       | 29              | 55.8                      |
| San Jacinto, TX   | 352             | (315,394)              | 379             | 1.08              | 27            | (-15,64)             | 91                        | 25              | 92.6                      |
| San Patricio, TX  | 646             | (589,702)              | 770             | 1.19              | 124           | (68,181)             | 187                       | 107             | 86.3                      |
| San Saba, TX      | 77              | (60,97)                | 100             | 1.30              | 23            | (3,40)               | 377                       | 15              | 65.2                      |
| Schleicher, TX    | 31              | (22,46)                | 28              | 0.90              | -3            | (-18,6)              | -111                      | 5               | NA                        |
| Scurry, TX        | 165             | (137,192)              | 223             | 1.35              | 58            | (31,86)              | 350                       | 38              | 65.5                      |
| Shackelford, TX   | 28              | (18,41)                | 51              | 1.82              | 23            | (10,33)              | 730                       | 5               | 21.7                      |
| Shelby, TX        | 315             | (280,356)              | 336             | 1.07              | 21            | (-20,56)             | 82                        | 48              | 228.6                     |
| Sherman, TX       | 26              | (15,38)                | 29              | 1.12              | 3             | (-9,14)              | 95                        | 13              | 433.3                     |
| Smith, TX         | 2246            | (2135,2359)            | 2735            | 1.22              | 489           | (376,600)            | 207                       | 312             | 63.8                      |
| Somervell, TX     | 105             | (82,126)               | 113             | 1.08              | 8             | (-13,31)             | 85                        | 10              | 125.0                     |
| Starr, TX         | 453             | (411,503)              | 721             | 1.59              | 268           | (218,310)            | 412                       | 219             | 81.7                      |
| Stephens, TX      | 113             | (91,138)               | 144             | 1.27              | 31            | (6,53)               | 320                       | 17              | 54.8                      |
| Sutton, TX        | 30              | (19,44)                | 49              | 1.63              | 19            | (5,30)               | 516                       | 5               | 26.3                      |
| Swisher, TX       | 96              | (77,119)               | 117             | 1.22              | 21            | (-2,40)              | 283                       | 16              | 76.2                      |
| Tarrant, TX       | 14099           | (13842,14415)          | 16416           | 1.16              | 2317          | (2001,2574)          | 108                       | 1878            | 81.1                      |
| Taylor, TX        | 1505            | (1430,1600)            | 1636            | 1.09              | 131           | (36,206)             | 94                        | 243             | 185.5                     |
| Terry, TX         | 135             | (111,162)              | 175             | 1.30              | 40            | (13,64)              | 335                       | 47              | 117.5                     |
| Throckmorton, TX  | 22              | (12,32)                | 17              | 0.77              | -5            | (-15,5)              | -330                      | 5               | NA                        |
| Titus, TX         | 324             | (289,364)              | 346             | 1.07              | 22            | (-18,57)             | 66                        | 62              | 281.8                     |

Table C1: Primary Estimates for Each County

| County         | Expected Deaths | Expected Deaths 95% CI | Observed Deaths | Observed/Expected | Excess Deaths | Excess Deaths 95% CI | Excess Deaths Per 100,000 | COVID-19 Deaths | COVID-19 to Excess Ratio (%) |
|----------------|-----------------|------------------------|-----------------|-------------------|---------------|----------------------|---------------------------|-----------------|------------------------------|
| Tom Green, TX  | 1122            | (1060,1208)            | 1439            | 1.28              | 317           | (231,379)            | 266                       | 202             | 63.7                         |
| Travis, TX     | 6097            | (5930,6275)            | 6988            | 1.15              | 891           | (713,1058)           | 69                        | 617             | 69.2                         |
| Trinity, TX    | 265             | (228,302)              | 255             | 0.96              | -10           | (-47,27)             | -68                       | 11              | NA                           |
| Tyler, TX      | 292             | (255,330)              | 322             | 1.10              | 30            | (-8,67)              | 136                       | 20              | 66.7                         |
| Upshur, TX     | 493             | (441,543)              | 557             | 1.13              | 64            | (14,116)             | 154                       | 54              | 84.4                         |
| Upton, TX      | 28              | (16,39)                | 44              | 1.57              | 16            | (5,28)               | 433                       | 5               | 31.2                         |
| Uvalde, TX     | 261             | (235,307)              | 328             | 1.26              | 67            | (21,93)              | 255                       | 43              | 64.2                         |
| Val Verde, TX  | 430             | (394,481)              | 571             | 1.33              | 141           | (90,177)             | 285                       | 167             | 118.4                        |
| Van Zandt, TX  | 682             | (629,745)              | 839             | 1.23              | 157           | (94,210)             | 272                       | 78              | 49.7                         |
| Victoria, TX   | 850             | (792,922)              | 1040            | 1.22              | 190           | (118,248)            | 207                       | 138             | 72.6                         |
| Walker, TX     | 560             | (511,614)              | 673             | 1.20              | 113           | (59,162)             | 155                       | 104             | 92.0                         |
| Waller, TX     | 359             | (316,400)              | 459             | 1.28              | 100           | (59,143)             | 175                       | 32              | 32.0                         |
| Ward, TX       | 117             | (89,135)               | 135             | 1.15              | 18            | (0,46)               | 146                       | 13              | 72.2                         |
| Washington, TX | 374             | (333,411)              | 478             | 1.28              | 104           | (67,145)             | 293                       | 67              | 64.4                         |
| Webb, TX       | 1485            | (1397,1573)            | 2185            | 1.47              | 700           | (612,788)            | 250                       | 535             | 76.4                         |
| Wharton, TX    | 443             | (402,497)              | 538             | 1.21              | 95            | (41,136)             | 232                       | 82              | 86.3                         |
| Wheeler, TX    | 67              | (46,84)                | 75              | 1.12              | 8             | (-9,29)              | 162                       | 11              | 137.5                        |
| Wichita, TX    | 1454            | (1387,1552)            | 1641            | 1.13              | 187           | (89,254)             | 141                       | 253             | 135.3                        |
| Wilbarger, TX  | 169             | (141,198)              | 210             | 1.24              | 41            | (12,69)              | 316                       | 40              | 97.6                         |
| Willacy, TX    | 190             | (163,222)              | 254             | 1.34              | 64            | (32,91)              | 299                       | 68              | 106.2                        |
| Williamson, TX | 3418            | (3294,3558)            | 3691            | 1.08              | 273           | (133,397)            | 45                        | 280             | 102.6                        |
| Wilson, TX     | 459             | (410,506)              | 459             | 1.00              | 0             | (-47,49)             | 0                         | 39              | Inf                          |
| Winkler, TX    | 76              | (58,97)                | 89              | 1.17              | 13            | (-8,31)              | 162                       | 18              | 138.5                        |
| Wise, TX       | 740             | (692,814)              | 785             | 1.06              | 45            | (-29,93)             | 61                        | 83              | 184.4                        |
| Wood, TX       | 678             | (626,743)              | 754             | 1.11              | 76            | (11,128)             | 162                       | 81              | 106.6                        |
| Yoakum, TX     | 63              | (47,80)                | 96              | 1.52              | 33            | (16,49)              | 382                       | 23              | 69.7                         |
| Young, TX      | 268             | (237,306)              | 333             | 1.24              | 65            | (27,96)              | 358                       | 33              | 50.8                         |
| Zapata, TX     | 101             | (81,125)               | 127             | 1.26              | 26            | (2,46)               | 186                       | 22              | 84.6                         |
| Zavala, TX     | 124             | (99,148)               | 156             | 1.26              | 32            | (8,57)               | 267                       | 29              | 90.6                         |
| Beaver, UT     | 69              | (49,86)                | 50              | 0.72              | -19           | (-36,1)              | -273                      | 5               | NA                           |
| Box Elder, UT  | 433             | (390,481)              | 493             | 1.14              | 60            | (12,103)             | 105                       | 31              | 51.7                         |
| Cache, UT      | 628             | (577,687)              | 657             | 1.05              | 29            | (-30,80)             | 22                        | 34              | 117.2                        |
| Carbon, UT     | 225             | (192,257)              | 262             | 1.16              | 37            | (5,70)               | 180                       | 10              | 27.0                         |
| Davis, UT      | 1983            | (1886,2087)            | 2213            | 1.12              | 230           | (126,327)            | 64                        | 113             | 49.1                         |
| Duchesne, UT   | 155             | (129,184)              | 163             | 1.05              | 8             | (-21,34)             | 40                        | 5               | 62.5                         |
| Emery, UT      | 115             | (96,148)               | 108             | 0.94              | -7            | (-40,12)             | -70                       | 5               | NA                           |
| Garfield, UT   | 55              | (38,71)                | 60              | 1.09              | 5             | (-11,22)             | 98                        | 5               | 100.0                        |
| Grand, UT      | 93              | (73,115)               | 81              | 0.87              | -12           | (-34,8)              | -120                      | 5               | NA                           |
| Iron, UT       | 365             | (322,401)              | 404             | 1.11              | 39            | (3,82)               | 69                        | 20              | 51.3                         |
| Juab, UT       | 80              | (64,105)               | 86              | 1.07              | 6             | (-19,22)             | 49                        | 5               | 83.3                         |
| Kane, UT       | 84              | (64,104)               | 66              | 0.79              | -18           | (-38,2)              | -223                      | 5               | NA                           |
| Millard, UT    | 106             | (84,129)               | 138             | 1.30              | 32            | (9,54)               | 241                       | 5               | 15.6                         |
| Morgan, UT     | 70              | (54,91)                | 81              | 1.16              | 11            | (-10,27)             | 89                        | 5               | 45.5                         |
| Piute, UT      | 22              | (12,31)                | 18              | 0.82              | -4            | (-13,6)              | -265                      | 5               | NA                           |
| Salt Lake, UT  | 7187            | (6998,7396)            | 7887            | 1.10              | 700           | (491,889)            | 59                        | 665             | 95.0                         |
| San Juan, UT   | 136             | (115,165)              | 168             | 1.24              | 32            | (3,53)               | 204                       | 45              | 140.6                        |
| Sanpete, UT    | 208             | (177,242)              | 246             | 1.18              | 38            | (4,69)               | 119                       | 14              | 36.8                         |
| Sevier, UT     | 223             | (195,263)              | 228             | 1.02              | 5             | (-35,33)             | 23                        | 5               | 100.0                        |
| Summit, UT     | 161             | (135,189)              | 172             | 1.07              | 11            | (-17,37)             | 26                        | 5               | 45.5                         |
| Tooele, UT     | 435             | (390,481)              | 418             | 0.96              | -17           | (-63,28)             | -23                       | 20              | NA                           |
| Uintah, UT     | 269             | (239,310)              | 302             | 1.12              | 33            | (-8,63)              | 92                        | 17              | 51.5                         |
| Utah, UT       | 2851            | (2732,2965)            | 3098            | 1.09              | 247           | (133,366)            | 38                        | 266             | 107.7                        |
| Wasatch, UT    | 159             | (134,187)              | 195             | 1.23              | 36            | (8,61)               | 100                       | 18              | 50.0                         |
| Washington, UT | 1578            | (1497,1671)            | 1745            | 1.11              | 167           | (74,248)             | 91                        | 123             | 73.7                         |
| Wayne, UT      | 24              | (13,35)                | 37              | 1.54              | 13            | (2,24)               | 494                       | 0               | 0.0                          |
| Weber, UT      | 1926            | (1814,2018)            | 2095            | 1.09              | 169           | (77,281)             | 64                        | 124             | 73.4                         |
| Addison, VT    | 328             | (289,366)              | 333             | 1.02              | 5             | (-33,44)             | 14                        | 5               | 100.0                        |
| Bennington, VT | 494             | (447,545)              | 482             | 0.98              | -12           | (-63,35)             | -34                       | 5               | NA                           |
| Caledonia, VT  | 329             | (293,370)              | 327             | 0.99              | -2            | (-43,34)             | -7                        | 5               | NA                           |
| Chittenden, VT | 1260            | (1187,1345)            | 1262            | 1.00              | 2             | (-83,75)             | 1                         | 69              | 3450.0                       |
| Essex, VT      | 89              | (71,111)               | 80              | 0.90              | -9            | (-31,9)              | -142                      | 5               | NA                           |
| Franklin, VT   | 473             | (425,523)              | 473             | 1.00              | 0             | (-50,48)             | 0                         | 29              | Inf                          |
| Grand Isle, VT | 62              | (43,76)                | 66              | 1.06              | 4             | (-10,23)             | 55                        | 5               | 125.0                        |
| Lamoille, VT   | 209             | (180,244)              | 246             | 1.18              | 37            | (2,66)               | 147                       | 5               | 13.5                         |

Table C1: Primary Estimates for Each County

| County             | Expected Deaths | Expected Deaths 95% CI | Observed Deaths | Observed/Expected | Excess Deaths | Excess Deaths 95% CI | Excess Deaths Per 100,000 | COVID-19 Deaths | COVID-19 Excess Ratio (%) |
|--------------------|-----------------|------------------------|-----------------|-------------------|---------------|----------------------|---------------------------|-----------------|---------------------------|
| Orange, VT         | 305             | (272,348)              | 290             | 0.95              | -15           | (-58,18)             | -52                       | 5               | NA                        |
| Orleans, VT        | 331             | (290,368)              | 342             | 1.03              | 11            | (-26,52)             | 41                        | 5               | 45.5                      |
| Rutland, VT        | 742             | (683,804)              | 781             | 1.05              | 39            | (-23,98)             | 67                        | 5               | 12.8                      |
| Washington, VT     | 564             | (515,618)              | 644             | 1.14              | 80            | (26,129)             | 138                       | 13              | 16.2                      |
| Windham, VT        | 469             | (421,519)              | 463             | 0.99              | -6            | (-56,42)             | -14                       | 11              | NA                        |
| Windsor, VT        | 618             | (559,669)              | 670             | 1.08              | 52            | (1,111)              | 94                        | 5               | 9.6                       |
| Accomack, VA       | 428             | (384,479)              | 509             | 1.19              | 81            | (30,125)             | 252                       | 39              | 48.1                      |
| Albemarle, VA      | 908             | (842,970)              | 1019            | 1.12              | 111           | (49,177)             | 100                       | 47              | 42.3                      |
| Alleghany, VA      | 213             | (188,252)              | 263             | 1.23              | 50            | (11,75)              | 345                       | 26              | 52.0                      |
| Amelia, VA         | 166             | (145,201)              | 188             | 1.13              | 22            | (-13,43)             | 168                       | 11              | 50.0                      |
| Amherst, VA        | 357             | (328,416)              | 387             | 1.08              | 30            | (-29,59)             | 96                        | 19              | 63.3                      |
| Appomattox, VA     | 206             | (175,238)              | 180             | 0.87              | -26           | (-58,5)              | -161                      | 5               | NA                        |
| Arlington, VA      | 881             | (809,944)              | 1162            | 1.32              | 281           | (218,353)            | 116                       | 158             | 56.2                      |
| Augusta, VA        | 749             | (698,821)              | 843             | 1.13              | 94            | (22,145)             | 124                       | 50              | 53.2                      |
| Bath, VA           | 70              | (55,93)                | 79              | 1.13              | 9             | (-14,24)             | 209                       | 5               | 55.6                      |
| Bedford, VA        | 931             | (876,1010)             | 961             | 1.03              | 30            | (-49,85)             | 38                        | 45              | 150.0                     |
| Bland, VA          | 81              | (60,100)               | 95              | 1.17              | 14            | (-5,35)              | 226                       | 10              | 71.4                      |
| Botetourt, VA      | 387             | (351,439)              | 390             | 1.01              | 3             | (-49,39)             | 9                         | 21              | 700.0                     |
| Brunswick, VA      | 234             | (201,270)              | 227             | 0.97              | -7            | (-43,26)             | -44                       | 16              | NA                        |
| Buchanan, VA       | 331             | (292,377)              | 383             | 1.16              | 52            | (6,91)               | 252                       | 32              | 61.5                      |
| Buckingham, VA     | 167             | (144,200)              | 210             | 1.26              | 43            | (10,66)              | 254                       | 24              | 55.8                      |
| Campbell, VA       | 620             | (568,679)              | 689             | 1.11              | 69            | (10,121)             | 126                       | 48              | 69.6                      |
| Caroline, VA       | 315             | (281,359)              | 343             | 1.09              | 28            | (-16,62)             | 89                        | 23              | 82.1                      |
| Carroll, VA        | 365             | (330,410)              | 476             | 1.30              | 111           | (66,146)             | 377                       | 54              | 48.6                      |
| Charles City, VA   | 94              | (79,123)               | 100             | 1.06              | 6             | (-23,21)             | 88                        | 10              | 166.7                     |
| Charlotte, VA      | 167             | (143,201)              | 190             | 1.14              | 23            | (-11,47)             | 197                       | 14              | 60.9                      |
| Chesterfield, VA   | 2879            | (2774,3022)            | 3070            | 1.07              | 191           | (48,296)             | 53                        | 196             | 102.6                     |
| Clarke, VA         | 161             | (138,194)              | 191             | 1.19              | 30            | (-3,53)              | 205                       | 10              | 33.3                      |
| Craig, VA          | 55              | (41,74)                | 71              | 1.29              | 16            | (-3,30)              | 316                       | 5               | 31.2                      |
| Culpeper, VA       | 494             | (446,545)              | 460             | 0.93              | -34           | (-85,14)             | -64                       | 37              | NA                        |
| Cumberland, VA     | 104             | (86,129)               | 117             | 1.12              | 13            | (-12,31)             | 133                       | 5               | 38.5                      |
| Dickenson, VA      | 218             | (189,254)              | 235             | 1.08              | 17            | (-19,46)             | 120                       | 16              | 94.1                      |
| Dinwiddie, VA      | 298             | (271,349)              | 330             | 1.11              | 32            | (-19,59)             | 111                       | 18              | 56.2                      |
| Essex, VA          | 132             | (109,155)              | 162             | 1.23              | 30            | (7,53)               | 279                       | 5               | 16.7                      |
| Fairfax, VA        | 5343            | (5198,5518)            | 6330            | 1.18              | 987           | (812,1132)           | 85                        | 731             | 74.1                      |
| Fauquier, VA       | 599             | (545,652)              | 620             | 1.04              | 21            | (-32,75)             | 29                        | 27              | 128.6                     |
| Floyd, VA          | 178             | (145,202)              | 233             | 1.31              | 55            | (31,88)              | 348                       | 15              | 27.3                      |
| Fluvanna, VA       | 254             | (217,286)              | 257             | 1.01              | 3             | (-29,40)             | 11                        | 15              | 500.0                     |
| Franklin, VA       | 657             | (601,713)              | 724             | 1.10              | 67            | (11,123)             | 119                       | 42              | 62.7                      |
| Frederick, VA      | 835             | (777,905)              | 890             | 1.07              | 55            | (-15,113)            | 60                        | 56              | 101.8                     |
| Giles, VA          | 244             | (213,281)              | 298             | 1.22              | 54            | (17,85)              | 318                       | 14              | 25.9                      |
| Gloucester, VA     | 459             | (422,516)              | 497             | 1.08              | 38            | (-19,75)             | 101                       | 15              | 39.5                      |
| Goochland, VA      | 225             | (197,263)              | 247             | 1.10              | 22            | (-16,50)             | 91                        | 13              | 59.1                      |
| Grayson, VA        | 193             | (165,226)              | 254             | 1.32              | 61            | (28,89)              | 391                       | 33              | 54.1                      |
| Greene, VA         | 170             | (141,201)              | 182             | 1.07              | 12            | (-19,41)             | 60                        | 5               | 41.7                      |
| Greensville, VA    | 165             | (122,174)              | 159             | 0.96              | -6            | (-15,37)             | -52                       | 21              | NA                        |
| Halifax, VA        | 495             | (460,561)              | 586             | 1.18              | 91            | (25,126)             | 273                       | 68              | 74.7                      |
| Hanover, VA        | 1041            | (975,1121)             | 1136            | 1.09              | 95            | (15,161)             | 86                        | 83              | 87.4                      |
| Henrico, VA        | 2978            | (2840,3087)            | 3499            | 1.17              | 521           | (412,659)            | 156                       | 290             | 55.7                      |
| Henry, VA          | 696             | (672,790)              | 877             | 1.26              | 181           | (87,205)             | 360                       | 83              | 45.9                      |
| Highland, VA       | 32              | (21,46)                | 28              | 0.88              | -4            | (-18,7)              | -182                      | 0               | 0.0                       |
| Isle of Wight, VA  | 374             | (340,426)              | 423             | 1.13              | 49            | (-3,83)              | 130                       | 31              | 63.3                      |
| James City, VA     | 879             | (800,921)              | 918             | 1.04              | 39            | (-3,118)             | 50                        | 38              | 97.4                      |
| King and Queen, VA | 107             | (94,141)               | 107             | 1.00              | 0             | (-34,13)             | 0                         | 5               | Inf                       |
| King George, VA    | 200             | (172,235)              | 226             | 1.13              | 26            | (-9,54)              | 96                        | 16              | 61.5                      |
| King William, VA   | 162             | (133,188)              | 187             | 1.15              | 25            | (-1,54)              | 144                       | 5               | 20.0                      |
| Lancaster, VA      | 234             | (206,278)              | 241             | 1.03              | 7             | (-37,35)             | 65                        | 5               | 71.4                      |
| Lee, VA            | 323             | (292,371)              | 374             | 1.16              | 51            | (3,82)               | 221                       | 35              | 68.6                      |
| Loudoun, VA        | 1635            | (1555,1731)            | 1864            | 1.14              | 229           | (133,309)            | 54                        | 184             | 80.3                      |
| Louisa, VA         | 398             | (364,450)              | 406             | 1.02              | 8             | (-44,42)             | 21                        | 15              | 187.5                     |
| Lunenburg, VA      | 161             | (139,196)              | 169             | 1.05              | 8             | (-27,30)             | 68                        | 5               | 62.5                      |
| Madison, VA        | 156             | (129,184)              | 154             | 0.99              | -2            | (-30,25)             | -15                       | 5               | NA                        |
| Mathews, VA        | 140             | (110,163)              | 141             | 1.01              | 1             | (-22,31)             | 11                        | 10              | 1000.0                    |
| Mecklenburg, VA    | 498             | (454,552)              | 518             | 1.04              | 20            | (-34,64)             | 66                        | 54              | 270.0                     |

Table C1: Primary Estimates for Each County

| County                    | Expected Deaths | Expected Deaths 95% CI | Observed Deaths | Observed/Expected | Excess Deaths | Excess Deaths 95% CI | Excess Deaths Per 100,000 | COVID-19 Deaths | COVID-19 Excess Ratio (%) |
|---------------------------|-----------------|------------------------|-----------------|-------------------|---------------|----------------------|---------------------------|-----------------|---------------------------|
| Middlesex, VA             | 176             | (151,212)              | 191             | 1.09              | 15            | (-21,40)             | 136                       | 11              | 73.3                      |
| Montgomery, VA            | 663             | (612,724)              | 725             | 1.09              | 62            | (1,113)              | 62                        | 55              | 88.7                      |
| Nelson, VA                | 190             | (164,224)              | 220             | 1.16              | 30            | (-4,56)              | 201                       | 5               | 16.7                      |
| New Kent, VA              | 207             | (177,239)              | 208             | 1.00              | 1             | (-31,31)             | 4                         | 14              | 1400.0                    |
| Northampton, VA           | 169             | (137,194)              | 230             | 1.36              | 61            | (36,93)              | 534                       | 26              | 42.6                      |
| Northumberland, VA        | 173             | (156,214)              | 209             | 1.21              | 36            | (-5,53)              | 303                       | 14              | 38.9                      |
| Nottoway, VA              | 219             | (190,255)              | 224             | 1.02              | 5             | (-31,34)             | 33                        | 23              | 460.0                     |
| Orange, VA                | 452             | (407,507)              | 453             | 1.00              | 1             | (-54,46)             | 3                         | 13              | 1300.0                    |
| Page, VA                  | 310             | (276,359)              | 370             | 1.19              | 60            | (11,94)              | 247                       | 37              | 61.7                      |
| Patrick, VA               | 265             | (223,294)              | 313             | 1.18              | 48            | (19,90)              | 273                       | 41              | 85.4                      |
| Pittsylvania, VA          | 753             | (717,841)              | 839             | 1.11              | 86            | (-2,122)             | 143                       | 61              | 70.9                      |
| Powhatan, VA              | 241             | (210,280)              | 291             | 1.21              | 50            | (11,81)              | 165                       | 10              | 20.0                      |
| Prince Edward, VA         | 255             | (223,292)              | 273             | 1.07              | 18            | (-19,50)             | 78                        | 18              | 100.0                     |
| Prince George, VA         | 254             | (225,295)              | 286             | 1.13              | 32            | (-9,61)              | 83                        | 12              | 37.5                      |
| Prince William, VA        | 2203            | (2110,2318)            | 2702            | 1.23              | 499           | (384,592)            | 105                       | 345             | 69.1                      |
| Pulaski, VA               | 472             | (445,542)              | 542             | 1.15              | 70            | (0,97)               | 207                       | 53              | 75.7                      |
| Rappahannock, VA          | 69              | (53,90)                | 76              | 1.10              | 7             | (-14,23)             | 99                        | 5               | 71.4                      |
| Richmond, VA              | 141             | (114,165)              | 130             | 0.92              | -11           | (-35,16)             | -120                      | 5               | NA                        |
| Roanoke, VA               | 1080            | (1006,1151)            | 1174            | 1.09              | 94            | (23,168)             | 99                        | 100             | 106.4                     |
| Rockbridge, VA            | 282             | (245,318)              | 324             | 1.15              | 42            | (6,79)               | 182                       | 24              | 57.1                      |
| Rockingham, VA            | 779             | (723,849)              | 915             | 1.17              | 136           | (66,192)             | 163                       | 88              | 64.7                      |
| Russell, VA               | 369             | (335,420)              | 402             | 1.09              | 33            | (-18,67)             | 126                       | 24              | 72.7                      |
| Scott, VA                 | 323             | (287,361)              | 382             | 1.18              | 59            | (21,95)              | 280                       | 41              | 69.5                      |
| Shenandoah, VA            | 520             | (467,572)              | 635             | 1.22              | 115           | (63,168)             | 262                       | 69              | 60.0                      |
| Smyth, VA                 | 475             | (437,540)              | 535             | 1.13              | 60            | (-5,98)              | 200                       | 53              | 88.3                      |
| Southampton, VA           | 189             | (167,228)              | 226             | 1.20              | 37            | (-2,59)              | 214                       | 39              | 105.4                     |
| Spotsylvania, VA          | 1051            | (990,1138)             | 1153            | 1.10              | 102           | (15,163)             | 74                        | 76              | 74.5                      |
| Stafford, VA              | 900             | (842,975)              | 901             | 1.00              | 1             | (-74,59)             | 1                         | 38              | 3800.0                    |
| Surry, VA                 | 83              | (60,99)                | 89              | 1.07              | 6             | (-10,29)             | 94                        | 5               | 83.3                      |
| Sussex, VA                | 138             | (113,166)              | 149             | 1.08              | 11            | (-17,36)             | 100                       | 18              | 163.6                     |
| Tazewell, VA              | 597             | (560,676)              | 706             | 1.18              | 109           | (30,146)             | 274                       | 34              | 31.2                      |
| Warren, VA                | 427             | (391,482)              | 442             | 1.04              | 15            | (-40,51)             | 36                        | 32              | 213.3                     |
| Washington, VA            | 705             | (668,787)              | 821             | 1.16              | 116           | (34,153)             | 213                       | 68              | 58.6                      |
| Westmoreland, VA          | 255             | (221,290)              | 276             | 1.08              | 21            | (-14,55)             | 117                       | 18              | 85.7                      |
| Wise, VA                  | 514             | (473,572)              | 591             | 1.15              | 77            | (19,118)             | 207                       | 54              | 70.1                      |
| Wythe, VA                 | 441             | (386,479)              | 471             | 1.07              | 30            | (-8,85)              | 105                       | 43              | 143.3                     |
| York, VA                  | 486             | (449,543)              | 534             | 1.10              | 48            | (-9,85)              | 71                        | 24              | 50.0                      |
| Alexandria city, VA       | 729             | (673,786)              | 833             | 1.14              | 104           | (47,160)             | 64                        | 88              | 84.6                      |
| Bristol city, VA          | 270             | (217,292)              | 297             | 1.10              | 27            | (5,80)               | 167                       | 22              | 81.5                      |
| Buena Vista city, VA      | 78              | (61,99)                | 100             | 1.28              | 22            | (1,39)               | 368                       | 10              | 45.5                      |
| Charlottesville city, VA  | 307             | (271,348)              | 307             | 1.00              | 0             | (-41,36)             | 0                         | 28              | Inf                       |
| Chesapeake city, VA       | 1966            | (1878,2073)            | 2186            | 1.11              | 220           | (113,308)            | 89                        | 146             | 66.4                      |
| Colonial Heights city, VA | 297             | (252,333)              | 277             | 0.93              | -20           | (-56,25)             | -110                      | 15              | NA                        |
| Covington city, VA        | 142             | (107,157)              | 103             | 0.73              | -39           | (-54,-4)             | -719                      | 5               | NA                        |
| Danville city, VA         | 687             | (646,766)              | 776             | 1.13              | 89            | (10,130)             | 223                       | 76              | 85.4                      |
| Emporia city, VA          | 46              | (39,72)                | 121             | 2.63              | 75            | (49,82)              | 1564                      | 21              | 28.0                      |
| Fairfax city, VA          | 296             | (264,341)              | 254             | 0.86              | -42           | (-87,-10)            | -166                      | 18              | NA                        |
| Falls Church city, VA     | 108             | (93,140)               | 100             | 0.93              | -8            | (-40,7)              | -52                       | 15              | NA                        |
| Franklin city, VA         | 147             | (123,175)              | 160             | 1.09              | 13            | (-15,37)             | 167                       | 22              | 169.2                     |
| Fredericksburg city, VA   | 215             | (186,251)              | 234             | 1.09              | 19            | (-17,48)             | 63                        | 11              | 57.9                      |
| Galax city, VA            | 223             | (177,246)              | 144             | 0.65              | -79           | (-102,-33)           | -1255                     | 26              | NA                        |
| Hampton city, VA          | 1395            | (1321,1485)            | 1460            | 1.05              | 65            | (-25,139)            | 48                        | 77              | 118.5                     |
| Harrisonburg city, VA     | 343             | (300,383)              | 348             | 1.01              | 5             | (-35,48)             | 9                         | 41              | 820.0                     |
| Hopewell city, VA         | 339             | (297,375)              | 335             | 0.99              | -4            | (-40,38)             | -18                       | 20              | NA                        |
| Lexington city, VA        | 97              | (74,118)               | 84              | 0.87              | -13           | (-34,10)             | -180                      | 5               | NA                        |
| Lynchburg city, VA        | 844             | (783,907)              | 924             | 1.09              | 80            | (17,141)             | 95                        | 60              | 75.0                      |
| Manassas city, VA         | 288             | (253,331)              | 289             | 1.00              | 1             | (-42,36)             | 2                         | 48              | 4800.0                    |
| Manassas Park city, VA    | 38              | (26,56)                | 38              | 1.00              | 0             | (-18,12)             | 0                         | 5               | Inf                       |
| Martinsville city, VA     | 375             | (328,415)              | 297             | 0.79              | -78           | (-118,-31)           | -611                      | 33              | NA                        |
| Newport News city, VA     | 1641            | (1558,1750)            | 1899            | 1.16              | 258           | (149,341)            | 146                       | 98              | 38.0                      |
| Norfolk city, VA          | 2080            | (1995,2196)            | 2237            | 1.08              | 157           | (41,242)             | 65                        | 134             | 85.4                      |
| Norton city, VA           | 68              | (51,87)                | 73              | 1.07              | 5             | (-14,22)             | 121                       | 5               | 100.0                     |
| Petersburg city, VA       | 641             | (592,712)              | 619             | 0.97              | -22           | (-93,27)             | -70                       | 41              | NA                        |
| Poquoson city, VA         | 139             | (114,166)              | 135             | 0.97              | -4            | (-31,21)             | -32                       | 5               | NA                        |

Table C1: Primary Estimates for Each County

| County                  | Expected Deaths | Expected Deaths 95% CI | Observed Deaths | Observed/Expected | Excess Deaths | Excess Deaths 95% CI | Excess Deaths Per 100,000 | COVID-19 Deaths | COVID-19 Excess Ratio (%) |
|-------------------------|-----------------|------------------------|-----------------|-------------------|---------------|----------------------|---------------------------|-----------------|---------------------------|
| Portsmouth city, VA     | 1084            | (997,1140)             | 1264            | 1.17              | 180           | (124,267)            | 190                       | 99              | 55.0                      |
| Radford city, VA        | 136             | (110,160)              | 130             | 0.96              | -6            | (-30,20)             | -32                       | 5               | NA                        |
| Richmond city, VA       | 1837            | (1770,1959)            | 2040            | 1.11              | 203           | (81,270)             | 87                        | 148             | 72.9                      |
| Roanoke city, VA        | 1279            | (1230,1388)            | 1501            | 1.17              | 222           | (113,271)            | 220                       | 123             | 55.4                      |
| Salem city, VA          | 388             | (346,429)              | 426             | 1.10              | 38            | (-3,80)              | 149                       | 27              | 71.1                      |
| Staunton city, VA       | 414             | (355,445)              | 408             | 0.99              | -6            | (-37,53)             | -23                       | 40              | NA                        |
| Suffolk city, VA        | 803             | (744,866)              | 977             | 1.22              | 174           | (111,233)            | 187                       | 92              | 52.9                      |
| Virginia Beach city, VA | 3342            | (3235,3493)            | 3628            | 1.09              | 286           | (135,393)            | 63                        | 180             | 62.9                      |
| Waynesboro city, VA     | 304             | (262,338)              | 274             | 0.90              | -30           | (-64,12)             | -129                      | 16              | NA                        |
| Williamsburg city, VA   | 70              | (58,98)                | 95              | 1.36              | 25            | (-3,37)              | 165                       | 5               | 20.0                      |
| Winchester city, VA     | 257             | (225,298)              | 327             | 1.27              | 70            | (29,102)             | 253                       | 25              | 35.7                      |
| Adams, WA               | 121             | (96,144)               | 126             | 1.04              | 5             | (-18,30)             | 25                        | 18              | 360.0                     |
| Asotin, WA              | 267             | (229,304)              | 308             | 1.15              | 41            | (4,79)               | 180                       | 26              | 63.4                      |
| Benton, WA              | 1581            | (1487,1660)            | 1784            | 1.13              | 203           | (124,297)            | 97                        | 168             | 82.8                      |
| Chelan, WA              | 727             | (676,797)              | 759             | 1.04              | 32            | (-38,83)             | 41                        | 47              | 146.9                     |
| Clallam, WA             | 1101            | (1055,1204)            | 1086            | 0.99              | -15           | (-118,31)            | -19                       | 5               | NA                        |
| Clark, WA               | 3874            | (3744,4049)            | 4194            | 1.08              | 320           | (145,450)            | 64                        | 144             | 45.0                      |
| Columbia, WA            | 62              | (44,79)                | 62              | 1.00              | 0             | (-17,18)             | 0                         | 5               | Inf                       |
| Cowlitz, WA             | 1316            | (1238,1406)            | 1323            | 1.01              | 7             | (-83,85)             | 6                         | 28              | 400.0                     |
| Douglas, WA             | 318             | (279,358)              | 341             | 1.07              | 23            | (-17,62)             | 52                        | 13              | 56.5                      |
| Ferry, WA               | 85              | (66,109)               | 102             | 1.20              | 17            | (-7,36)              | 219                       | 5               | 29.4                      |
| Franklin, WA            | 439             | (395,492)              | 528             | 1.20              | 89            | (36,133)             | 90                        | 78              | 87.6                      |
| Garfield, WA            | 27              | (16,37)                | 27              | 1.00              | 0             | (-10,11)             | 0                         | 5               | Inf                       |
| Grant, WA               | 737             | (675,791)              | 826             | 1.12              | 89            | (35,151)             | 89                        | 92              | 103.4                     |
| Grays Harbor, WA        | 943             | (887,1023)             | 963             | 1.02              | 20            | (-60,76)             | 26                        | 30              | 150.0                     |
| Island, WA              | 869             | (811,936)              | 855             | 0.98              | -14           | (-81,44)             | -16                       | 34              | NA                        |
| Jefferson, WA           | 420             | (376,467)              | 412             | 0.98              | -8            | (-55,36)             | -24                       | 5               | NA                        |
| King, WA                | 13653           | (13353,13965)          | 14510           | 1.06              | 857           | (545,1157)           | 37                        | 1093            | 127.5                     |
| Kitsap, WA              | 2438            | (2353,2567)            | 2364            | 0.97              | -74           | (-203,11)            | -27                       | 50              | NA                        |
| Kittitas, WA            | 348             | (310,392)              | 363             | 1.04              | 15            | (-29,53)             | 30                        | 29              | 193.3                     |
| Klickitat, WA           | 216             | (189,254)              | 213             | 0.99              | -3            | (-41,24)             | -13                       | 5               | NA                        |
| Lewis, WA               | 993             | (915,1058)             | 1023            | 1.03              | 30            | (-35,108)            | 36                        | 32              | 106.7                     |
| Lincoln, WA             | 122             | (99,148)               | 127             | 1.04              | 5             | (-21,28)             | 45                        | 5               | 100.0                     |
| Mason, WA               | 757             | (691,816)              | 746             | 0.99              | -11           | (-70,55)             | -16                       | 17              | NA                        |
| Okanogan, WA            | 470             | (424,520)              | 487             | 1.04              | 17            | (-33,63)             | 40                        | 38              | 223.5                     |
| Pacific, WA             | 360             | (312,395)              | 325             | 0.90              | -35           | (-70,13)             | -154                      | 5               | NA                        |
| Pend Oreille, WA        | 178             | (151,208)              | 177             | 0.99              | -1            | (-31,26)             | -7                        | 5               | NA                        |
| Pierce, WA              | 7368            | (7166,7573)            | 7490            | 1.02              | 122           | (-83,324)            | 13                        | 353             | 289.3                     |
| San Juan, WA            | 149             | (121,175)              | 146             | 0.98              | -3            | (-29,25)             | -17                       | 5               | NA                        |
| Skagit, WA              | 1331            | (1251,1410)            | 1364            | 1.02              | 33            | (-46,113)            | 25                        | 47              | 142.4                     |
| Skamania, WA            | 94              | (76,119)               | 101             | 1.07              | 7             | (-18,25)             | 58                        | 5               | 71.4                      |
| Spohomish, WA           | 5903            | (5728,6076)            | 6206            | 1.05              | 303           | (130,478)            | 36                        | 408             | 134.7                     |
| Spokane, WA             | 5011            | (4817,5148)            | 5297            | 1.06              | 286           | (149,480)            | 54                        | 352             | 123.1                     |
| Stevens, WA             | 503             | (447,543)              | 516             | 1.03              | 13            | (-27,69)             | 28                        | 23              | 176.9                     |
| Thurston, WA            | 2537            | (2430,2651)            | 2533            | 1.00              | -4            | (-118,103)           | -1                        | 63              | NA                        |
| Wahkiakum, WA           | 50              | (37,67)                | 55              | 1.10              | 5             | (-12,18)             | 106                       | 5               | 100.0                     |
| Walla Walla, WA         | 619             | (559,668)              | 642             | 1.04              | 23            | (-26,83)             | 37                        | 43              | 187.0                     |
| Whatcom, WA             | 1828            | (1746,1929)            | 1903            | 1.04              | 75            | (-26,157)            | 32                        | 65              | 86.7                      |
| Whitman, WA             | 283             | (247,317)              | 320             | 1.13              | 37            | (3,73)               | 73                        | 26              | 70.3                      |
| Yakima, WA              | 2163            | (2055,2276)            | 2535            | 1.17              | 372           | (259,480)            | 147                       | 335             | 90.1                      |
| Barbour, WV             | 197             | (169,229)              | 251             | 1.27              | 54            | (22,82)              | 325                       | 13              | 24.1                      |
| Berkeley, WV            | 1176            | (1106,1261)            | 1364            | 1.16              | 188           | (103,258)            | 155                       | 68              | 36.2                      |
| Boone, WV               | 330             | (293,376)              | 350             | 1.06              | 20            | (-26,57)             | 95                        | 19              | 95.0                      |
| Braxton, WV             | 188             | (160,220)              | 169             | 0.90              | -19           | (-51,9)              | -137                      | 5               | NA                        |
| Brooke, WV              | 315             | (278,355)              | 398             | 1.26              | 83            | (43,120)             | 380                       | 43              | 51.8                      |
| Cabell, WV              | 1368            | (1312,1483)            | 1371            | 1.00              | 3             | (-112,59)            | 3                         | 104             | 3466.7                    |
| Calhoun, WV             | 97              | (77,119)               | 106             | 1.09              | 9             | (-13,29)             | 126                       | 0               | 0.0                       |
| Clay, WV                | 134             | (111,165)              | 141             | 1.05              | 7             | (-24,30)             | 83                        | 5               | 71.4                      |
| Doddridge, WV           | 75              | (54,93)                | 91              | 1.21              | 16            | (-2,37)              | 196                       | 5               | 31.2                      |
| Fayette, WV             | 648             | (602,715)              | 687             | 1.06              | 39            | (-28,85)             | 93                        | 43              | 110.3                     |
| Gilmer, WV              | 97              | (78,122)               | 98              | 1.01              | 1             | (-24,20)             | 13                        | 5               | 500.0                     |
| Grant, WV               | 147             | (127,181)              | 170             | 1.16              | 23            | (-11,43)             | 199                       | 23              | 100.0                     |
| Greenbrier, WV          | 495             | (463,565)              | 550             | 1.11              | 55            | (-15,87)             | 162                       | 47              | 85.5                      |
| Hampshire, WV           | 285             | (252,328)              | 316             | 1.11              | 31            | (-12,64)             | 133                       | 26              | 83.9                      |

Table C1: Primary Estimates for Each County

| County          | Expected Deaths | Expected Deaths 95% CI | Observed Deaths | Observed/Expected | Excess Deaths | Excess Deaths 95% CI | Excess Deaths Per 100,000 | COVID-19 Deaths | COVID-19 Excess Ratio (%) |
|-----------------|-----------------|------------------------|-----------------|-------------------|---------------|----------------------|---------------------------|-----------------|---------------------------|
| Hancock, WV     | 456             | (414,508)              | 539             | 1.18              | 83            | (31,125)             | 292                       | 65              | 78.3                      |
| Hardy, WV       | 167             | (137,193)              | 205             | 1.23              | 38            | (12,68)              | 279                       | 5               | 13.2                      |
| Harrison, WV    | 868             | (818,956)              | 861             | 0.99              | -7            | (-95,43)             | -10                       | 33              | NA                        |
| Jackson, WV     | 386             | (341,427)              | 395             | 1.02              | 9             | (-32,54)             | 32                        | 31              | 344.4                     |
| Jefferson, WV   | 541             | (496,600)              | 613             | 1.13              | 72            | (13,117)             | 125                       | 36              | 50.0                      |
| Kanawha, WV     | 2626            | (2525,2775)            | 2943            | 1.12              | 317           | (168,418)            | 181                       | 217             | 68.5                      |
| Lewis, WV       | 250             | (214,286)              | 268             | 1.07              | 18            | (-18,54)             | 115                       | 5               | 27.8                      |
| Lincoln, WV     | 295             | (273,353)              | 322             | 1.09              | 27            | (-31,49)             | 135                       | 12              | 44.4                      |
| Logan, WV       | 572             | (525,630)              | 596             | 1.04              | 24            | (-34,71)             | 76                        | 64              | 266.7                     |
| McDowell, WV    | 320             | (284,365)              | 365             | 1.14              | 45            | (0,81)               | 255                       | 5               | 11.1                      |
| Marion, WV      | 747             | (689,809)              | 735             | 0.98              | -12           | (-74,46)             | -22                       | 20              | NA                        |
| Marshall, WV    | 388             | (350,433)              | 461             | 1.19              | 73            | (28,111)             | 244                       | 62              | 84.9                      |
| Mason, WV       | 379             | (344,430)              | 394             | 1.04              | 15            | (-36,50)             | 57                        | 22              | 146.7                     |
| Mercer, WV      | 877             | (817,949)              | 1037            | 1.18              | 160           | (88,220)             | 277                       | 54              | 33.8                      |
| Mineral, WV     | 343             | (303,384)              | 407             | 1.19              | 64            | (23,104)             | 242                       | 71              | 110.9                     |
| Mingo, WV       | 355             | (329,419)              | 411             | 1.16              | 56            | (-8,82)              | 243                       | 27              | 48.2                      |
| Monongalia, WV  | 748             | (688,809)              | 808             | 1.08              | 60            | (-1,120)             | 56                        | 35              | 58.3                      |
| Monroe, WV      | 179             | (153,212)              | 219             | 1.22              | 40            | (7,66)               | 305                       | 18              | 45.0                      |
| Morgan, WV      | 248             | (217,287)              | 249             | 1.00              | 1             | (-38,32)             | 6                         | 10              | 1000.0                    |
| Nicholas, WV    | 330             | (302,379)              | 353             | 1.07              | 23            | (-26,51)             | 95                        | 11              | 47.8                      |
| Ohio, WV        | 585             | (541,656)              | 692             | 1.18              | 107           | (36,151)             | 260                       | 48              | 44.9                      |
| Pendleton, WV   | 100             | (82,125)               | 125             | 1.25              | 25            | (0,43)               | 355                       | 5               | 20.0                      |
| Pleasants, WV   | 99              | (82,124)               | 102             | 1.03              | 3             | (-22,20)             | 39                        | 5               | 166.7                     |
| Pocahontas, WV  | 107             | (85,135)               | 120             | 1.12              | 13            | (-15,35)             | 157                       | 5               | 38.5                      |
| Preston, WV     | 397             | (347,439)              | 438             | 1.10              | 41            | (-1,91)              | 121                       | 36              | 87.8                      |
| Putnam, WV      | 655             | (612,730)              | 690             | 1.05              | 35            | (-40,78)             | 62                        | 58              | 165.7                     |
| Raleigh, WV     | 1104            | (1051,1204)            | 1212            | 1.10              | 108           | (8,161)              | 149                       | 31              | 28.7                      |
| Randolph, WV    | 367             | (327,413)              | 391             | 1.07              | 24            | (-22,64)             | 84                        | 5               | 20.8                      |
| Ritchie, WV     | 125             | (99,148)               | 136             | 1.09              | 11            | (-12,37)             | 115                       | 5               | 45.5                      |
| Roane, WV       | 233             | (201,268)              | 205             | 0.88              | -28           | (-63,4)              | -203                      | 11              | NA                        |
| Summers, WV     | 200             | (166,227)              | 220             | 1.10              | 20            | (-7,54)              | 160                       | 12              | 60.0                      |
| Taylor, WV      | 199             | (167,228)              | 253             | 1.27              | 54            | (25,86)              | 322                       | 10              | 18.5                      |
| Tucker, WV      | 93              | (79,122)               | 124             | 1.33              | 31            | (2,45)               | 451                       | 5               | 16.1                      |
| Tyler, WV       | 106             | (84,129)               | 98              | 0.92              | -8            | (-31,14)             | -93                       | 5               | NA                        |
| Upshur, WV      | 279             | (240,314)              | 304             | 1.09              | 25            | (-10,64)             | 104                       | 5               | 20.0                      |
| Wayne, WV       | 569             | (518,627)              | 632             | 1.11              | 63            | (5,114)              | 160                       | 34              | 54.0                      |
| Webster, WV     | 126             | (102,153)              | 118             | 0.94              | -8            | (-35,16)             | -98                       | 5               | NA                        |
| Wetzel, WV      | 226             | (197,263)              | 233             | 1.03              | 7             | (-30,36)             | 47                        | 14              | 200.0                     |
| Wirt, WV        | 65              | (47,81)                | 67              | 1.03              | 2             | (-14,20)             | 34                        | 5               | 250.0                     |
| Wood, WV        | 1141            | (1078,1232)            | 1201            | 1.05              | 60            | (-31,123)            | 73                        | 81              | 135.0                     |
| Wyoming, WV     | 309             | (266,343)              | 378             | 1.22              | 69            | (35,112)             | 347                       | 27              | 39.1                      |
| Adams, WI       | 302             | (267,346)              | 299             | 0.99              | -3            | (-47,32)             | -14                       | 18              | NA                        |
| Ashland, WI     | 206             | (179,244)              | 201             | 0.98              | -5            | (-43,22)             | -32                       | 16              | NA                        |
| Barron, WI      | 542             | (506,612)              | 587             | 1.08              | 45            | (-25,81)             | 100                       | 66              | 146.7                     |
| Bayfield, WI    | 175             | (144,201)              | 200             | 1.14              | 25            | (-1,56)              | 166                       | 18              | 72.0                      |
| Brown, WI       | 2184            | (2095,2303)            | 2453            | 1.12              | 269           | (150,358)            | 101                       | 255             | 94.8                      |
| Buffalo, WI     | 141             | (119,171)              | 133             | 0.94              | -8            | (-38,14)             | -61                       | 11              | NA                        |
| Burnett, WI     | 212             | (182,249)              | 205             | 0.97              | -7            | (-44,23)             | -45                       | 28              | NA                        |
| Calumet, WI     | 400             | (357,446)              | 418             | 1.04              | 18            | (-28,61)             | 36                        | 39              | 216.7                     |
| Chippewa, WI    | 658             | (603,717)              | 693             | 1.05              | 35            | (-24,90)             | 54                        | 68              | 194.3                     |
| Clark, WI       | 363             | (320,401)              | 395             | 1.09              | 32            | (-6,75)              | 91                        | 57              | 178.1                     |
| Columbia, WI    | 580             | (533,638)              | 634             | 1.09              | 54            | (-4,101)             | 94                        | 48              | 88.9                      |
| Crawford, WI    | 181             | (154,215)              | 209             | 1.15              | 28            | (-6,55)              | 170                       | 13              | 46.4                      |
| Dane, WI        | 3525            | (3399,3675)            | 3984            | 1.13              | 459           | (309,585)            | 83                        | 247             | 53.8                      |
| Dodge, WI       | 1006            | (943,1088)             | 1210            | 1.20              | 204           | (122,267)            | 232                       | 156             | 76.5                      |
| Door, WI        | 359             | (314,395)              | 390             | 1.09              | 31            | (-5,76)              | 111                       | 28              | 90.3                      |
| Douglas, WI     | 421             | (386,473)              | 548             | 1.30              | 127           | (75,162)             | 295                       | 67              | 52.8                      |
| Dunn, WI        | 391             | (351,434)              | 365             | 0.93              | -26           | (-69,14)             | -56                       | 25              | NA                        |
| Eau Claire, WI  | 939             | (865,998)              | 1020            | 1.09              | 81            | (22,155)             | 76                        | 89              | 109.9                     |
| Florence, WI    | 77              | (59,97)                | 78              | 1.01              | 1             | (-19,19)             | 23                        | 15              | 1500.0                    |
| Fond du Lac, WI | 1015            | (956,1102)             | 1167            | 1.15              | 152           | (65,211)             | 146                       | 115             | 75.7                      |
| Forest, WI      | 127             | (105,156)              | 128             | 1.01              | 1             | (-28,23)             | 11                        | 25              | 2500.0                    |
| Grant, WI       | 510             | (471,573)              | 591             | 1.16              | 81            | (18,120)             | 157                       | 82              | 101.2                     |
| Green, WI       | 365             | (322,406)              | 421             | 1.15              | 56            | (15,99)              | 151                       | 17              | 30.4                      |

Table C1: Primary Estimates for Each County

| County          | Expected Deaths | Expected Deaths 95% CI | Observed Deaths | Observed/Expected | Excess Deaths | Excess Deaths 95% CI | Excess Deaths Per 100,000 | COVID-19 Deaths | COVID-19 Excess Ratio (%) |
|-----------------|-----------------|------------------------|-----------------|-------------------|---------------|----------------------|---------------------------|-----------------|---------------------------|
| Green Lake, WI  | 259             | (226,298)              | 263             | 1.02              | 4             | (-35,37)             | 21                        | 21              | 525.0                     |
| Iowa, WI        | 204             | (172,235)              | 239             | 1.17              | 35            | (4,67)               | 146                       | 11              | 31.4                      |
| Iron, WI        | 90              | (70,111)               | 109             | 1.21              | 19            | (-2,39)              | 335                       | 24              | 126.3                     |
| Jackson, WI     | 212             | (178,241)              | 269             | 1.27              | 57            | (28,91)              | 278                       | 20              | 35.1                      |
| Jefferson, WI   | 786             | (735,863)              | 863             | 1.10              | 77            | (0,128)              | 89                        | 90              | 116.9                     |
| Juneau, WI      | 314             | (277,358)              | 306             | 0.97              | -8            | (-52,29)             | -30                       | 22              | NA                        |
| Kenosha, WI     | 1532            | (1457,1636)            | 1746            | 1.14              | 214           | (110,289)            | 125                       | 261             | 122.0                     |
| Kewaunee, WI    | 197             | (168,230)              | 229             | 1.16              | 32            | (-1,61)              | 157                       | 33              | 103.1                     |
| La Crosse, WI   | 1064            | (1006,1147)            | 1185            | 1.11              | 121           | (38,179)             | 102                       | 76              | 62.8                      |
| Lafayette, WI   | 152             | (131,185)              | 166             | 1.09              | 14            | (-19,35)             | 84                        | 5               | 35.7                      |
| Langlade, WI    | 235             | (207,277)              | 291             | 1.24              | 56            | (14,84)              | 289                       | 43              | 76.8                      |
| Lincoln, WI     | 345             | (302,383)              | 435             | 1.26              | 90            | (52,133)             | 327                       | 71              | 78.9                      |
| Manitowoc, WI   | 931             | (856,988)              | 1012            | 1.09              | 81            | (24,156)             | 103                       | 66              | 81.5                      |
| Marathon, WI    | 1284            | (1215,1374)            | 1433            | 1.12              | 149           | (59,218)             | 110                       | 188             | 126.2                     |
| Marinette, WI   | 570             | (536,640)              | 641             | 1.12              | 71            | (1,105)              | 174                       | 70              | 98.6                      |
| Marquette, WI   | 219             | (183,244)              | 243             | 1.11              | 24            | (-1,60)              | 153                       | 24              | 100.0                     |
| Menominee, WI   | 54              | (40,72)                | 69              | 1.28              | 15            | (-3,29)              | 320                       | 14              | 93.3                      |
| Milwaukee, WI   | 8590            | (8434,8882)            | 10377           | 1.21              | 1787          | (1495,1943)          | 190                       | 1076            | 60.2                      |
| Monroe, WI      | 446             | (405,498)              | 495             | 1.11              | 49            | (-3,90)              | 104                       | 29              | 59.2                      |
| Oconto, WI      | 401             | (364,451)              | 462             | 1.15              | 61            | (11,98)              | 159                       | 59              | 96.7                      |
| Oneida, WI      | 494             | (442,540)              | 573             | 1.16              | 79            | (33,131)             | 221                       | 51              | 64.6                      |
| Outagamie, WI   | 1599            | (1514,1688)            | 1757            | 1.10              | 158           | (69,243)             | 83                        | 186             | 117.7                     |
| Ozaukee, WI     | 862             | (802,927)              | 937             | 1.09              | 75            | (10,135)             | 83                        | 89              | 118.7                     |
| Pepin, WI       | 74              | (56,95)                | 75              | 1.01              | 1             | (-20,19)             | 14                        | 5               | 500.0                     |
| Pierce, WI      | 324             | (283,362)              | 350             | 1.08              | 26            | (-12,67)             | 60                        | 31              | 119.2                     |
| Polk, WI        | 503             | (458,556)              | 496             | 0.99              | -7            | (-60,38)             | -16                       | 33              | NA                        |
| Portage, WI     | 559             | (512,616)              | 624             | 1.12              | 65            | (8,112)              | 91                        | 51              | 78.5                      |
| Price, WI       | 198             | (167,228)              | 206             | 1.04              | 8             | (-22,39)             | 60                        | 5               | 62.5                      |
| Racine, WI      | 1999            | (1924,2128)            | 2298            | 1.15              | 299           | (170,374)            | 151                       | 288             | 96.3                      |
| Richland, WI    | 203             | (173,237)              | 222             | 1.09              | 19            | (-15,49)             | 111                       | 15              | 78.9                      |
| Rock, WI        | 1628            | (1552,1727)            | 1855            | 1.14              | 227           | (128,303)            | 138                       | 154             | 67.8                      |
| Rusk, WI        | 189             | (156,220)              | 195             | 1.03              | 6             | (-25,39)             | 43                        | 18              | 300.0                     |
| St. Croix, WI   | 664             | (611,721)              | 748             | 1.13              | 84            | (27,137)             | 91                        | 45              | 53.6                      |
| Sauk, WI        | 691             | (631,741)              | 747             | 1.08              | 56            | (6,116)              | 86                        | 46              | 82.1                      |
| Sawyer, WI      | 222             | (192,257)              | 264             | 1.19              | 42            | (7,72)               | 252                       | 19              | 45.2                      |
| Shawano, WI     | 507             | (465,567)              | 561             | 1.11              | 54            | (-6,96)              | 133                       | 78              | 144.4                     |
| Sheboygan, WI   | 1169            | (1095,1255)            | 1337            | 1.14              | 168           | (82,242)             | 145                       | 148             | 88.1                      |
| Taylor, WI      | 204             | (173,237)              | 206             | 1.01              | 2             | (-31,33)             | 10                        | 35              | 1750.0                    |
| Trempealeau, WI | 308             | (269,345)              | 321             | 1.04              | 13            | (-24,52)             | 44                        | 37              | 284.6                     |
| Vernon, WI      | 302             | (260,340)              | 371             | 1.23              | 69            | (31,111)             | 223                       | 30              | 43.5                      |
| Vilas, WI       | 325             | (297,377)              | 331             | 1.02              | 6             | (-46,34)             | 27                        | 32              | 533.3                     |
| Walworth, WI    | 1005            | (947,1088)             | 1196            | 1.19              | 191           | (108,249)            | 183                       | 133             | 69.6                      |
| Washburn, WI    | 205             | (177,241)              | 248             | 1.21              | 43            | (7,71)               | 267                       | 17              | 39.5                      |
| Washington, WI  | 1277            | (1220,1373)            | 1393            | 1.09              | 116           | (20,173)             | 85                        | 127             | 109.5                     |
| Waukesha, WI    | 3772            | (3661,3941)            | 4277            | 1.13              | 505           | (336,616)            | 124                       | 477             | 94.5                      |
| Waupaca, WI     | 745             | (678,798)              | 824             | 1.11              | 79            | (26,146)             | 155                       | 125             | 158.2                     |
| Waushara, WI    | 299             | (264,343)              | 337             | 1.13              | 38            | (-6,73)              | 156                       | 26              | 68.4                      |
| Winnebago, WI   | 1603            | (1531,1710)            | 1809            | 1.13              | 206           | (99,278)             | 120                       | 197             | 95.6                      |
| Wood, WI        | 893             | (843,973)              | 984             | 1.10              | 91            | (11,141)             | 125                       | 62              | 68.1                      |
| Albany, WY      | 197             | (171,233)              | 253             | 1.28              | 56            | (20,82)              | 144                       | 11              | 19.6                      |
| Big Horn, WY    | 148             | (130,183)              | 147             | 0.99              | -1            | (-36,17)             | -8                        | 23              | NA                        |
| Campbell, WY    | 264             | (233,303)              | 332             | 1.26              | 68            | (29,99)              | 148                       | 42              | 61.8                      |
| Carbon, WY      | 136             | (113,163)              | 169             | 1.24              | 33            | (6,56)               | 228                       | 17              | 51.5                      |
| Converse, WY    | 119             | (95,142)               | 144             | 1.21              | 25            | (2,49)               | 186                       | 11              | 44.0                      |
| Crook, WY       | 65              | (48,85)                | 105             | 1.62              | 40            | (20,57)              | 533                       | 11              | 27.5                      |
| Fremont, WY     | 438             | (395,488)              | 561             | 1.28              | 123           | (73,166)             | 316                       | 69              | 56.1                      |
| Goshen, WY      | 155             | (131,187)              | 194             | 1.25              | 39            | (7,63)               | 293                       | 20              | 51.3                      |
| Hot Springs, WY | 76              | (59,97)                | 103             | 1.36              | 27            | (6,44)               | 627                       | 5               | 18.5                      |
| Johnson, WY     | 111             | (84,132)               | 101             | 0.91              | -10           | (-31,17)             | -118                      | 5               | NA                        |
| Laramie, WY     | 904             | (847,981)              | 982             | 1.09              | 78            | (1,135)              | 78                        | 71              | 91.0                      |
| Lincoln, WY     | 149             | (124,178)              | 176             | 1.18              | 27            | (-2,52)              | 137                       | 11              | 40.7                      |
| Natrona, WY     | 742             | (689,807)              | 924             | 1.25              | 182           | (117,235)            | 233                       | 110             | 60.4                      |
| Niobrara, WY    | 27              | (14,37)                | 39              | 1.44              | 12            | (2,25)               | 506                       | 5               | 41.7                      |
| Park, WY        | 310             | (275,355)              | 349             | 1.13              | 39            | (-6,74)              | 132                       | 18              | 46.2                      |

Table C1: Primary Estimates for Each County

| County         | Expected Deaths | Expected Deaths 95% CI | Observed Deaths | Observed/Expected | Excess Deaths | Excess Deaths 95% CI | Excess Deaths Per 100,000 | COVID-19 Deaths | COVID-19 to Excess Ratio (%) |
|----------------|-----------------|------------------------|-----------------|-------------------|---------------|----------------------|---------------------------|-----------------|------------------------------|
| Platte, WY     | 108             | (86,131)               | 110             | 1.02              | 2             | (-21,24)             | 23                        | 10              | 500.0                        |
| Sheridan, WY   | 348             | (302,390)              | 344             | 0.99              | -4            | (-46,42)             | -13                       | 19              | NA                           |
| Sublette, WY   | 73              | (56,93)                | 74              | 1.01              | 1             | (-19,18)             | 10                        | 5               | 500.0                        |
| Sweetwater, WY | 326             | (294,373)              | 414             | 1.27              | 88            | (41,120)             | 209                       | 26              | 29.5                         |
| Teton, WY      | 97              | (78,121)               | 95              | 0.98              | -2            | (-26,17)             | -9                        | 5               | NA                           |
| Uinta, WY      | 160             | (135,191)              | 181             | 1.13              | 21            | (-10,46)             | 105                       | 5               | 23.8                         |
| Washakie, WY   | 87              | (65,109)               | 105             | 1.21              | 18            | (-4,40)              | 237                       | 22              | 122.2                        |
| Weston, WY     | 67              | (52,87)                | 81              | 1.21              | 14            | (-6,29)              | 202                       | 5               | 35.7                         |
